# Supplementary material for: Transcription and potential functions of a novel XIST isoform in male peripheral glia
Source: HighWire-hosted journal article supplement (doi:10.1101/gr.280832.125), 2025-12-12
Supplement: Supplemental_Tables.xlsx [file Supplemental_Tables.xlsx]

## Sheet: Supplemental Table S1
Supplemental Table S1: Summary of public datasets used in this study
Human peripheal nerve bulk RNA-seq data
sample	sample abbreviation	sex	group
GSM7974768	CON_1	m	control
GSM7974769	CON_2	m	control
GSM7974770	CON_3	f	control
GSM7974771	CON_4	m	control
GSM7974772	CON_5	m	control
GSM7974773	CON_6	m	control
GSM7974774	CON_7	f	control
GSM7974775	CON_8	f	control
GSM7974776	CON_9	f	control
GSM7974777	CON_10	m	control
GSM7974778	CON_11	m	control
GSM7974779	MN_1	f	Morton's neuroma
GSM7974780	MN_2	f	Morton's neuroma
GSM7974781	MN_3	f	Morton's neuroma
GSM7974782	MN_4	f	Morton's neuroma
GSM7974783	MN_5	f	Morton's neuroma
GSM7974784	MN_6	f	Morton's neuroma
GSM7974785	MN_7	m	Morton's neuroma
GSM7974786	MN_8	f	Morton's neuroma
GSM7974787	MN_9	f	Morton's neuroma
GSM7974788	MN_10	m	Morton's neuroma
GSM7974789	MN_11	f	Morton's neuroma
GSM7974790	MN_12	f	Morton's neuroma
GSM7974791	MN_13	f	Morton's neuroma
GSM7974792	MN_14	m	Morton's neuroma
GSM7974793	MN_15	f	Morton's neuroma
GSM7974794	MN_16	f	Morton's neuroma
GSM7974795	MN_17	f	Morton's neuroma
GSM7974796	MN_18	f	Morton's neuroma
GSM7974797	MN_19	f	Morton's neuroma
GSM7974798	MN_20	f	Morton's neuroma
GSM7974799	MN_21	f	Morton's neuroma
GSM7974800	MN_22	m	Morton's neuroma
Huamn tibial and sciatic nerve bulk RNA-seq, ATAC-seq, and ChIP-seq data
sample	sex	age	tissue	technology	used for
ENCFF035PZL	m	54	tibial nerve	H3K9me3	Fig 3
ENCFF583SHF	m	54	tibial nerve	H3K36me3	Fig 3
ENCFF897XKD	m	54	tibial nerve	H3K4me3	Fig 3
ENCFF191XFU	m	37	tibial nerve	H3K4me3	Fig 3
ENCFF644VHX	m	37	tibial nerve	DNase-seq	Fig 3
ENCFF900QPE	m	37	tibial nerve	RNA-seq	Fig 3
ENCFF304ZAM	m	54	tibial nerve	RNA-seq	Fig 3
ENCFF723HDY	m	54	tibial nerve	H3K4me1	Fig 3
ENCFF358NLK	m	37	tibial nerve	H3K4me1	Fig 3
ENCFF726GTH	m	26	sciatic nerve	ATAC-seq	Fig 3
ENCFF408LFB	m	37	tibial nerve	H3K36me3	Fig 3
ENCFF782LED	m	37	tibial nerve	H3K9me3	Fig 3
ENCFF410TEC	m	54	tibial nerve	RNA-seq	Fig 3
ENCFF798CZY	m	54	tibial nerve	DNase-seq	Fig 3
ENCFF470DSV	m	26	sciatic nerve	ATAC-seq	Fig 3
ENCFF846HBS	m	37	tibial nerve	H3K27me3	Fig 3
ENCFF506GVK	m	54	tibial nerve	H3K27ac	Fig 3
ENCFF865AIG	m	37	tibial nerve	H3K27ac	Fig 3
ENCFF532KPO	m	37	tibial nerve	RNA-seq	Fig 3
ENCFF897ESV	m	54	tibial nerve	H3K27me3	Fig 3
ENCFF389XBN	f	47	sciatic nerve	ATAC-seq	Fig 3
ENCFF005AXK	m	37	tibial nerve	RNA-seq	Fig S7
ENCFF390ZIX	f	53	tibial nerve	RNA-seq	Fig S7
ENCFF753PVA	f	85	dorsolateral prefrontal cortex	RNA-seq	Fig S7
ENCFF109VUF	m	54	tibial nerve	RNA-seq	Fig S7
ENCFF428KEE	f	53	tibial nerve	RNA-seq	Fig S7
ENCFF848HHK	f	90+	dorsolateral prefrontal cortex	RNA-seq	Fig S7
ENCFF142ZMY	f	41	sciatic nerve	RNA-seq	Fig S7
ENCFF447MVI	f	87	dorsolateral prefrontal cortex	RNA-seq	Fig S7
ENCFF854SRF	m	54	tibial nerve	RNA-seq	Fig S7
ENCFF214CNN	f	51	tibial nerve	RNA-seq	Fig S7
ENCFF465BBX	f	90+	dorsolateral prefrontal cortex	RNA-seq	Fig S7
ENCFF932JDT	f	51	tibial nerve	RNA-seq	Fig S7
ENCFF218HKY	f	87	dorsolateral prefrontal cortex	RNA-seq	Fig S7
ENCFF574LHU	f	85	dorsolateral prefrontal cortex	RNA-seq	Fig S7
ENCFF982PYU	m	54	tibial nerve	RNA-seq	Fig S7
ENCFF235OLK	m	37	tibial nerve	RNA-seq	Fig S7
ENCFF605DTN	f	83	dorsolateral prefrontal cortex	RNA-seq	Fig S7
ENCFF241ZTE	f	83	dorsolateral prefrontal cortex	RNA-seq	Fig S7
ENCFF635PBX	f	41	sciatic nerve	RNA-seq	Fig S7
ENCFF086PHD	m	82	dorsolateral prefrontal cortex	RNA-seq	Fig S7
ENCFF284PNH	m	82	dorsolateral prefrontal cortex	RNA-seq	Fig S7
ENCFF753LRK	m	84	dorsolateral prefrontal cortex	RNA-seq	Fig S7
ENCFF157TGD	m	83	dorsolateral prefrontal cortex	RNA-seq	Fig S7
ENCFF334RCT	m	84	dorsolateral prefrontal cortex	RNA-seq	Fig S7
ENCFF797SHB	m	83	dorsolateral prefrontal cortex	RNA-seq	Fig S7
ENCFF229UAB	m	87	dorsolateral prefrontal cortex	RNA-seq	Fig S7
ENCFF561RWD	m	87	dorsolateral prefrontal cortex	RNA-seq	Fig S7
Human heart long-read RNA-seq data
sample	sex	age	tissue	technology
ENCFF330VRX	m	60	right cardiac atrium	long read RNA-seq
ENCFF327SFR	f	46	right cardiac ventricle	long read RNA-seq
Human heart sc/snRNA-seq data
sample	age (range for heart cell atlas)	sex	collection location	Study (Author)	external ID	original set #s (in code)	Sample number (in code)	technology	kit	lab	doublets already removed?	demographic info (if available)
1	4 yrs	m	left ventricle	Mehdiabadi et al.	na	set17	11	snRNA seq	3' v3	Porrello	no	na
2	10 yrs	f	left ventricle	Mehdiabadi et al.	na	set18	12	snRNA seq	3' v3	Porrello	no	na
3	14 yrs	m	left ventricle	Mehdiabadi et al.	na	set19	13	snRNA seq	3' v3	Porrello	no	na
4	35 yrs	f	left ventricle	Sim et al.	na	set20	14	snRNA seq	3' v3	Porrello	no	na
5	41 yrs	m	left ventricle	Sim et al.	na	set21	15	snRNA seq	3' v3	Porrello	no	na
6	42 yrs	m	left ventricle	Sim et al.	na	set22	16	snRNA seq	3' v3	Porrello	no	na
7	40-45 yrs	f	apex, left atrium, left ventricle, right atrium, right ventricle, and intraventricular septum	Kanemaru et al.	H6	set42	33	snRNA seq	3' v3	harvard	yes, scrublet	caucasian
8	45-50 yrs	f	apex, left atrium, left ventricle, right atrium, right ventricle, and intraventricular septum	Kanemaru et al.	H7	set43	34	snRNA seq	3' v3	harvard	yes, scrublet	caucasian
9	50-55 yrs	m	apex, left atrium, left ventricle, right atrium, right ventricle, and intraventricular septum	Kanemaru et al.	H3	set39	30	snRNA seq	3' v3	harvard	yes, scrublet	asian
10	50-55 yrs	m	apex, left atrium, left ventricle, right atrium, right ventricle, and intraventricular septum	Kanemaru et al.	H2	set38	29	snRNA seq	3' v3	harvard	yes, scrublet	caucasian
11	50-55 yrs	f	apex, left atrium, left ventricle, right atrium, right ventricle, and intraventricular septum	Kanemaru et al.	d1	set30	21	snRNA seq	3' v2	sanger	yes, scrublet	caucasian
12	50-55 yrs	f	apex, left atrium, left ventricle, right atrium, right ventricle, and intraventricular septum	Kanemaru et al.	H5	set41	32	snRNA seq	3' v3	harvard	yes, scrublet	caucasian
13	55-60 yrs	m	apex, left atrium, left ventricle, right atrium, right ventricle, and intraventricular septum	Kanemaru et al.	d3	set32	23	sc/sn/multiome	3' v2	sanger	yes, scrublet	caucasian
14	55-60 yrs	m	apex, left atrium, left ventricle, right atrium, right ventricle, and intraventricular septum	Kanemaru et al.	H4	set40	31	snRNA seq	3' v3	harvard	yes, scrublet	caucasian
15	60-65 yrs	m	apex, left atrium, left ventricle, right atrium, right ventricle, and intraventricular septum	Kanemaru et al.	d2	set31	22	snRNA seq	3' v2	sanger	yes, scrublet	caucasian
16	60-65 yrs	m	apex, left atrium, left ventricle, right atrium, right ventricle, and intraventricular septum	Kanemaru et al.	d7	set36	27	sc/sn/multiome	3' v2	sanger	yes, scrublet	caucasian
17	60-65 yrs	f	apex, left atrium, left ventricle, right atrium, right ventricle, and intraventricular septum	Kanemaru et al.	d11	set37	28	both	3' v3	sanger	yes, scrublet	caucasian
18	65-70 yrs	m	apex, left atrium, left ventricle, right atrium, right ventricle, and intraventricular septum	Kanemaru et al.	d6	set35	26	both	3' v2	sanger	yes, scrublet	caucasian
19	65-70 yrs	f	apex, left atrium, left ventricle, right atrium, right ventricle, and intraventricular septum	Kanemaru et al.	d5	set34	25	both	3' v2	sanger	yes, scrublet	caucasian
20	70-75 yrs	f	apex, left atrium, left ventricle, right atrium, right ventricle, and intraventricular septum	Kanemaru et al.	d4	set33	24	both	3' v2	sanger	yes, scrublet	caucasian
Human skeletal muscle atlas data
sample	age group	sex
339C	70-75 yrs	f
343B	70-75 yrs	f
362C	60-65 yrs	m
367C	70-75 yrs	m
411C	25-30 yrs	m
464C	35-40 yrs	m
470BR	15-20 yrs	m
582C	55-60 yrs	f
583B	25-30 yrs	m
591C	35-40 yrs	m
621B	50-55 yrs	m
640C	70-75 yrs	f
Cardiomyopathy heart snRNA-seq data
sample	sex	age group	demographic info (if available)	disease group
D1	f	50-59	Caucasian	Healthy
D2	m	60-69	Caucasian	Healthy
D4	f	70-79	Caucasian	Healthy
D5	f	60-69	Caucasian	Healthy
D6	m	70-79	Caucasian	Healthy
D7	m	60-69	Caucasian	Healthy
H2	m	50-59	Caucasian	Healthy
H3	m	50-59	Asian	Healthy
H4	m	50-59	Caucasian	Healthy
H5	f	50-59	Caucasian	Healthy
H6	f	40-49	Caucasian	Healthy
H7	f	40-49	Caucasian	Healthy
H46	m	20-29	NA	Healthy
H49	f	40-49	NA	Healthy
H51	m	50-59	NA	Healthy
H53	m	60-69	NA	Healthy
H55	m	40-49	NA	Healthy
H67	m	40-49	NA	Healthy
H78	m	50-59	NA	DCM
H12	m	60-69	NA	DCM
H13	m	40-49	NA	DCM
DS3	m	50-59	Caucasian	DCM
H03_IC	m	30-39	Caucasian	DCM
H73	m	10-19	Caucasian	DCM
H32	m	60-69	Caucasian	DCM
H06	f	30-39	NA	DCM
H24	f	50-59	NA	DCM
H25	m	50-59	NA	DCM
H26	f	40-49	Caucasian	DCM
H27	f	50-59	NA	DCM
H28	m	60-69	NA	DCM
H29	f	40-49	NA	ACM
H31	m	40-49	NA	DCM
H04	m	40-49	South Asian	DCM
H05	m	10-19	NA	DCM
DL2	m	40-49	Caucasian	DCM
DL3	m	60-69	Caucasian	DCM
H07	m	60-69	NA	ACM
H08	f	30-39	NA	ACM
H09	m	60-69	NA	ACM
H10	m	60-69	NA	ACM
H11	m	40-49	NA	ACM
H42	m	50-59	NA	ACM
H44	f	50-59	Caucasian	ACM
DP1	f	40-49	Caucasian	DCM
DP2	f	40-49	Caucasian	DCM
H01	m	50-59	NA	DCM
H02	m	50-59	NA	DCM
H03	f	40-49	NA	DCM
H56	m	50-59	Caucasian	DCM
H57	m	30-39	Caucasian	DCM
H58	f	30-39	Caucasian	DCM
H59	m	0-9	Caucasian	DCM
H04_IC	f	60-69	Caucasian	DCM
H15	m	60-69	NA	DCM
H17	m	20-29	Caucasian	DCM
H19	m	30-39	NA	DCM
H20	m	40-49	NA	DCM
H21	f	20-29	Caucasian	DCM
H22	m	20-29	NA	DCM
H33	m	30-39	Caucasian	DCM
H18	m	20-29	Caucasian	DCM
H79	m	0-9	NA	DCM
H80	m	10-19	NA	DCM
H81	f	10-19	Caucasian	DCM
DO1	m	10-19	Caucasian	DCM
H84	f	10-19	NA	RCM/LVNC
H14	m	40-49	NA	DCM
H16	m	20-29	Caucasian	DCM
H34	f	30-39	NA	DCM
H35	m	40-49	NA	DCM
H36	m	40-49	NA	DCM
H37	m	50-59	NA	DCM
H39	m	60-69	NA	DCM
H40	m	60-69	NA	DCM
H41	f	60-69	NA	DCM
DT4	m	60-69	Caucasian	DCM
H01_IC	m	40-49	Caucasian	DCM
H02_IC	m	10-19	Caucasian	DCM
Mouse snRNA-seq data
study	sex	# predicted male cells	# predicted female cells	age group	nerve type
GSE182098	pooled m+f	3445	6231	8-12 weeks	sciatic, sural, vagus, peroneall
GSE137870	pooled m+f	1262	2594	P1 & P60	sciatic

## Sheet: Supplemental Table S2
Supplemental Table S2: Number and percentage of human male and female cells expressing XIST for all identified skeletal muscle and heart cell types
cell type	sex	total cells	XIST+ cells	% XIST+	dataset
aCM	F	12300	8702	70.75	skeletal muscle atlas
aCM	M	16083	11	0.07	skeletal muscle atlas
Adipocyte	F	2106	1835	87.13	skeletal muscle atlas
Adipocyte	M	1997	11	0.55	skeletal muscle atlas
EC	F	34356	21243	61.83	skeletal muscle atlas
EC	M	71614	102	0.14	skeletal muscle atlas
FB	F	34576	19958	57.72	skeletal muscle atlas
FB	M	47423	41	0.09	skeletal muscle atlas
Lymphoid Lineage	F	4490	2587	57.62	skeletal muscle atlas
Lymphoid Lineage	M	13933	37	0.27	skeletal muscle atlas
Mural	F	37319	18218	48.82	skeletal muscle atlas
Mural	M	49557	13	0.03	skeletal muscle atlas
Myeloid Lineage	F	8133	5438	66.86	skeletal muscle atlas
Myeloid Lineage	M	18273	8	0.04	skeletal muscle atlas
vCM	F	83788	62019	74.02	skeletal muscle atlas
vCM	M	69290	24	0.03	skeletal muscle atlas
mSchwann	F	148	88	59.46	skeletal muscle atlas
mSchwann	M	502	109	21.71	skeletal muscle atlas
nmSchwann	F	1761	1123	63.77	skeletal muscle atlas
nmSchwann	M	2522	785	31.13	skeletal muscle atlas
aCM	F	12300	8702	70.75	integrated heart
aCM	M	16083	11	0.07	integrated heart
Adipocyte	F	2106	1835	87.13	integrated heart
Adipocyte	M	1997	11	0.55	integrated heart
EC	F	34356	21243	61.83	integrated heart
EC	M	71614	102	0.14	integrated heart
FB	F	34576	19958	57.72	integrated heart
FB	M	47423	41	0.09	integrated heart
Lymphoid Lineage	F	4490	2587	57.62	integrated heart
Lymphoid Lineage	M	13933	37	0.27	integrated heart
Mural	F	37319	18218	48.82	integrated heart
Mural	M	49557	13	0.03	integrated heart
Myeloid Lineage	F	8133	5438	66.86	integrated heart
Myeloid Lineage	M	18273	8	0.04	integrated heart
vCM	F	83788	62019	74.02	integrated heart
vCM	M	69290	24	0.03	integrated heart
Other Glia	F	296	242	81.76	integrated heart
Other Glia	M	552	146	26.45	integrated heart
mSchwann	F	232	150	64.66	integrated heart
mSchwann	M	621	126	20.29	integrated heart
nmSchwann	F	1381	819	59.3	integrated heart
nmSchwann	M	1851	622	33.6	integrated heart

## Sheet: Supplemental Table S3
Supplemental Table S3: Human CELLxGENE data used to determine male and female cell types with a high percentage of XIST-positive cells across tissues
Tissue	Cell Type Fixed	Cell Count	Tissue Composition	Sex	Gene Symbol	Expression	Expression, Scaled	Number of Cells Expressing Genes	Percent Expressing XIST
liver	endothelial stalk cell	4224	0.0037	female	XIST	2.5142	0.457849	4205	99.5502
skin of body	malignant cell	6669	0.0092	female	XIST	2.65618	0.515544	6625	99.3402
skin of body	blood vessel endothelial cell	736	0.001	female	XIST	2.44092	0.428069	728	98.913
brain	L2/3-6 intratelencephalic projecting glutamatergic neuron	792760	0.0526	female	XIST	2.41232	0.416447	781521	98.5823
chest wall	blood vessel endothelial cell	1732	0.0909	female	XIST	2.50594	0.454493	1697	97.9792
axilla	blood vessel endothelial cell	4275	0.0493	female	XIST	2.32008	0.378966	4173	97.614
brain	near-projecting glutamatergic cortical neuron	27611	0.0018	female	XIST	2.36985	0.399192	26868	97.309
axilla	endothelial cell	4922	0.0565	female	XIST	2.28938	0.366492	4782	97.1556
brain	caudal ganglionic eminence derived interneuron	10741	0.0007	female	XIST	2.33264	0.384069	10425	97.058
brain	lamp5 GABAergic cortical interneuron	83647	0.0055	female	XIST	2.38384	0.404875	81178	97.0483
brain	sncg GABAergic cortical interneuron	24615	0.0016	female	XIST	2.32856	0.382411	23863	96.945
chest wall	macrophage	2389	0.124	female	XIST	2.63977	0.508875	2315	96.9025
chest wall	cell of skeletal muscle	1765	0.0914	female	XIST	2.71557	0.539678	1706	96.6572
breast	blood vessel smooth muscle cell	288	0.0001	female	XIST	2.6835	0.526645	278	96.5278
brain	cerebral cortex neuron	1387248	0.09	female	XIST	2.37164	0.399917	1338005	96.4503
brain	corticothalamic-projecting glutamatergic cortical neuron	38118	0.0025	female	XIST	2.35371	0.39263	36756	96.4269
brain	sst GABAergic cortical interneuron	92513	0.006	female	XIST	2.35178	0.391847	89147	96.3616
brain	cerebral cortex GABAergic interneuron	465092	0.0301	female	XIST	2.30972	0.374758	447714	96.2635
brain	GABAergic interneuron	465995	0.0302	female	XIST	2.30987	0.374817	448434	96.2315
brain	direct pathway medium spiny neuron	2382	0.0002	female	XIST	2.37247	0.400255	2290	96.1377
brain	pvalb GABAergic cortical interneuron	141855	0.0092	female	XIST	2.22127	0.338815	136290	96.077
brain	cortical interneuron	473967	0.0306	female	XIST	2.31228	0.375798	454611	95.9162
brain	CNS interneuron	475419	0.0307	female	XIST	2.31356	0.376316	455732	95.859
chest wall	mononuclear cell	3234	0.1661	female	XIST	2.64543	0.511174	3100	95.8565
brain	indirect pathway medium spiny neuron	2836	0.0002	female	XIST	2.38561	0.405593	2718	95.8392
brain	medium spiny neuron	5447	0.0004	female	XIST	2.37939	0.403065	5220	95.8326
brain	vip GABAergic cortical interneuron	122389	0.0079	female	XIST	2.32545	0.381146	117169	95.7349
brain	L4 intratelencephalic projecting glutamatergic neuron	311	0	female	XIST	2.53399	0.465891	297	95.4984
brain	type II pneumocyte	484	0	female	XIST	3.19486	0.734442	461	95.2479
brain	chandelier pvalb GABAergic cortical interneuron	15950	0.001	female	XIST	2.16257	0.314961	15174	95.1348
brain	L6b glutamatergic cortical neuron	26494	0.0017	female	XIST	2.18969	0.325979	25153	94.9385
brain	L5 extratelencephalic projecting glutamatergic cortical neuron	5107	0.0003	female	XIST	2.11315	0.294878	4844	94.8502
brain	chandelier cell	16108	0.001	female	XIST	2.16108	0.314354	15274	94.8224
chest wall	blood vessel smooth muscle cell	247	0.0125	female	XIST	2.52644	0.462822	234	94.7368
liver	blood vessel smooth muscle cell	2622	0.0022	female	XIST	2.48298	0.445161	2483	94.6987
brain	L5/6 near-projecting glutamatergic neuron	483	0	female	XIST	2.20399	0.331792	457	94.617
chest wall	connective tissue cell	2229	0.113	female	XIST	2.73215	0.546416	2109	94.6164
chest wall	fibroblast	2228	0.113	female	XIST	2.73216	0.546417	2108	94.614
brain	L5/6 near-projecting glutamatergic neuron of the primary motor cortex	386	0	female	XIST	2.12721	0.300592	365	94.5596
brain	L2/3 intratelencephalic projecting glutamatergic neuron	9182	0.0006	female	XIST	2.20632	0.332738	8610	93.7704
brain	inhibitory interneuron	520906	0.0327	female	XIST	2.3192	0.378609	486198	93.337
embryo	forebrain neuroblast	4039	0.0242	female	XIST	2.72249	0.542488	3768	93.2904
embryo	cortical interneuron	4067	0.0243	female	XIST	2.71958	0.541307	3794	93.2874
breast	malignant cell	27957	0.0111	female	XIST	2.60566	0.495015	25975	92.9105
chest wall	T cell	845	0.0421	female	XIST	2.66211	0.517953	785	92.8994
embryo	glutamatergic neuron	524	0.0031	female	XIST	2.58013	0.48464	486	92.7481
embryo	secretory cell	537	0.0032	female	XIST	2.57259	0.481576	498	92.7374
embryo	cerebral cortex GABAergic interneuron	13	0.0001	female	XIST	2.26727	0.357505	12	92.3077
axilla	blood vessel smooth muscle cell	1503	0.0164	female	XIST	2.48847	0.447392	1387	92.2821
brain	interneuron	551700	0.0342	female	XIST	2.32523	0.381058	508933	92.2481
brain	astrocyte of the cerebral cortex	97401	0.006	female	XIST	2.46202	0.436643	89785	92.1808
embryo	neuron	8774	0.0519	female	XIST	2.57182	0.481264	8086	92.1587
eye	ON midget ganglion cell	66075	0.0166	female	XIST	2.23591	0.344762	60884	92.1438
embryo	interneuron	8250	0.0487	female	XIST	2.57129	0.481048	7600	92.1212
embryo	neural cell	13646	0.0806	female	XIST	2.60468	0.494616	12569	92.1076
eye	midget ganglion cell of retina	155497	0.0388	female	XIST	2.23661	0.345045	142762	91.8101
eye	OFF midget ganglion cell	89400	0.0223	female	XIST	2.23714	0.345262	81876	91.5839
eye	H1 horizontal cell	26191	0.0065	female	XIST	2.40531	0.4136	23964	91.4971
eye	OFF parasol ganglion cell	5424	0.0013	female	XIST	2.19834	0.329494	4959	91.427
embryo	inhibitory interneuron	4194	0.0245	female	XIST	2.42285	0.420726	3816	90.9871
eye	parasol ganglion cell of retina	8960	0.0022	female	XIST	2.22136	0.338848	8150	90.9598
liver	blood vessel endothelial cell	13933	0.011	female	XIST	2.46486	0.437799	12669	90.928
liver	squamous epithelial cell	14021	0.011	female	XIST	2.46441	0.437616	12710	90.6497
eye	retinal ganglion cell	194647	0.0478	female	XIST	2.24152	0.347041	175888	90.3626
eye	ON parasol ganglion cell	3536	0.0009	female	XIST	2.25713	0.353384	3191	90.2432
eye	H2 horizontal cell	4028	0.001	female	XIST	2.44481	0.429651	3623	89.9454
adipose tissue	Schwann cell	157	0.0006	female	XIST	2.54294	0.469526	141	89.8089
axilla	B cell	3273	0.0347	female	XIST	2.58268	0.485677	2938	89.7647
axilla	connective tissue cell	10100	0.1071	female	XIST	2.53218	0.465155	9057	89.6733
axilla	fibroblast	10099	0.107	female	XIST	2.53211	0.465126	9056	89.6722
eye	retina horizontal cell	33519	0.0082	female	XIST	2.38997	0.407365	30030	89.591
brain	sst chodl GABAergic cortical interneuron	37	0	female	XIST	2.20373	0.331687	33	89.1892
liver	endothelial cell of vascular tree	14491	0.0112	female	XIST	2.47174	0.440593	12907	89.0691
axilla	lymphocyte of B lineage	3948	0.0415	female	XIST	2.68136	0.525774	3515	89.0324
heart	adipocyte of epicardial fat of left ventricle	221	0.0001	female	XIST	2.2451	0.348495	196	88.6878
brain	GABAergic neuron	522028	0.0311	female	XIST	2.3149	0.376862	462530	88.6025
brain	immature astrocyte	328	0	female	XIST	2.42466	0.421462	287	87.5
brain	meningeal macrophage	416	0	female	XIST	2.62415	0.502526	364	87.5
spinal cord	astrocyte	1054	0.0207	female	XIST	3.06558	0.681907	922	87.4763
brain	forebrain neuroblast	3209	0.0002	female	XIST	2.82049	0.582311	2806	87.4416
brain	cerebellar granule cell precursor	3022	0.0002	female	XIST	2.72128	0.541998	2640	87.3594
brain	ependymal cell	7861	0.0005	female	XIST	2.66582	0.519459	6862	87.2917
brain	columnar/cuboidal epithelial cell	7862	0.0005	female	XIST	2.66582	0.519459	6862	87.2806
spinal cord	oligodendrocyte precursor cell	557	0.0109	female	XIST	2.6339	0.506489	486	87.2531
brain	L6 intratelencephalic projecting glutamatergic neuron of the primary motor cortex	860	0.0001	female	XIST	1.96816	0.235958	750	87.2093
embryo	brain vascular cell	704	0.0039	female	XIST	2.34895	0.390695	613	87.0739
brain	ciliated epithelial cell	7883	0.0005	female	XIST	2.66582	0.519459	6862	87.0481
liver	periportal region hepatocyte	44727	0.0338	female	XIST	2.63676	0.507651	38909	86.9922
embryo	cell	24731	0.138	female	XIST	2.46943	0.439655	21513	86.988
liver	hepatocyte	167575	0.1265	female	XIST	2.60747	0.495749	145674	86.9306
eye	invaginating midget bipolar cell	38650	0.0091	female	XIST	2.33833	0.386383	33580	86.8823
eye	astrocyte	4481	0.0011	female	XIST	2.54215	0.469205	3888	86.7663
adipose tissue	fibro/adipogenic progenitor cell	14831	0.0506	female	XIST	2.48142	0.444526	12860	86.7103
lymph node	hematopoietic stem cell	30	0.0001	female	XIST	2.30962	0.374715	26	86.6667
brain	brainstem motor neuron	1938	0.0001	female	XIST	2.75453	0.555507	1676	86.4809
eye	GABAergic amacrine cell	139876	0.0328	female	XIST	2.1976	0.329196	120461	86.1198
brain	choroid plexus epithelial cell	4944	0.0003	female	XIST	2.70102	0.533764	4248	85.9223
liver	hepatic stellate cell	8723	0.0065	female	XIST	2.61813	0.500082	7493	85.8993
liver	stromal cell	8724	0.0065	female	XIST	2.61813	0.500082	7493	85.8895
heart	cardiac muscle myoblast	19958	0.0096	female	XIST	2.17675	0.320721	17137	85.8653
adipose tissue	adipocyte	36512	0.1231	female	XIST	2.3345	0.384826	31274	85.654
heart	myoblast	20753	0.0099	female	XIST	2.18492	0.324041	17755	85.5539
axilla	plasma cell	675	0.0068	female	XIST	3.18378	0.72994	577	85.4815
eye	amacrine cell	226746	0.0526	female	XIST	2.21314	0.33551	193469	85.3241
spinal cord	macroglial cell	5322	0.1017	female	XIST	2.80845	0.577418	4539	85.2875
adipose tissue	mesothelial cell	21729	0.073	female	XIST	2.37257	0.400295	18532	85.2869
spinal cord	glial cell	6215	0.1187	female	XIST	2.78602	0.568306	5300	85.2776
spinal cord	neuron associated cell	6254	0.1194	female	XIST	2.78658	0.568533	5332	85.2574
spinal cord	microglial cell	893	0.017	female	XIST	2.65228	0.513958	761	85.2184
embryo	precursor cell	14287	0.0779	female	XIST	2.42882	0.423153	12143	84.9934
eye	starburst amacrine cell	4752	0.0011	female	XIST	2.27551	0.360853	4033	84.8695
spinal cord	oligodendrocyte	4268	0.081	female	XIST	2.7429	0.550783	3617	84.747
spinal cord	leukocyte	1085	0.0206	female	XIST	2.65412	0.514707	919	84.7005
bone marrow	stromal cell of bone marrow	103	0.0002	female	XIST	2.28149	0.363286	87	84.466
brain	vascular leptomeningeal cell	6282	0.0004	female	XIST	2.47165	0.440556	5305	84.4476
liver	epithelial cell	225271	0.1651	female	XIST	2.56416	0.478149	190132	84.4015
adipose tissue	progenitor cell	16257	0.054	female	XIST	2.48001	0.443955	13714	84.3575
lung	IgA plasma cell	292	0.0001	female	XIST	2.82275	0.583232	246	84.2466
eye	diffuse bipolar 4 cell	17639	0.004	female	XIST	2.29505	0.368793	14854	84.2111
spinal cord	central nervous system macrophage	943	0.0178	female	XIST	2.65866	0.516551	794	84.1994
mucosa	basal-myoepithelial cell of mammary gland	829	0.0066	female	XIST	2.72462	0.543355	698	84.1978
axilla	lymphocyte	13079	0.13	female	XIST	2.47502	0.441929	10998	84.089
mucosa	basal cell	2222	0.0176	female	XIST	2.61537	0.49896	1859	83.6634
eye	glycinergic amacrine cell	41351	0.0094	female	XIST	2.24011	0.346467	34587	83.6425
liver	fibroblast	20138	0.0146	female	XIST	2.57903	0.484193	16824	83.5435
brain	secretory cell	1828437	0.1028	female	XIST	2.38723	0.406254	1527298	83.5303
brain	fibroblast	6421	0.0004	female	XIST	2.46788	0.439026	5361	83.4917
colon	type EC enteroendocrine cell	12	0	female	XIST	1.96549	0.234874	10	83.3333
mucosa	neuroendocrine cell	12	0.0001	female	XIST	2.47405	0.441533	10	83.3333
liver	connective tissue cell	20263	0.0147	female	XIST	2.57663	0.483216	16876	83.2848
lung	serous secreting cell of bronchus submucosal gland	1950	0.0005	female	XIST	2.34118	0.387541	1624	83.2821
embryo	oligodendrocyte precursor cell	365	0.0019	female	XIST	2.37393	0.40085	303	83.0137
adipose tissue	epithelial cell	43326	0.1415	female	XIST	2.42259	0.42062	35948	82.971
brain	neural progenitor cell	1933	0.0001	female	XIST	2.49818	0.451338	1603	82.9281
placenta	uterine smooth muscle cell	15168	0.0256	female	XIST	2.45969	0.435698	12543	82.6938
mucosa	columnar/cuboidal epithelial cell	859	0.0067	female	XIST	2.71861	0.540913	710	82.6542
placenta	smooth muscle cell	15223	0.0257	female	XIST	2.46042	0.435995	12574	82.5987
adipose tissue	endothelial cell of lymphatic vessel	3183	0.0103	female	XIST	2.53525	0.466401	2625	82.4694
axilla	mononuclear cell	21289	0.2074	female	XIST	2.4043	0.413191	17546	82.4182
axilla	leukocyte	21370	0.208	female	XIST	2.40273	0.412553	17600	82.3584
mucosa	myeloid dendritic cell	118	0.0009	female	XIST	2.64284	0.510121	97	82.2034
eye	interneuron	526769	0.1177	female	XIST	2.2187	0.33777	432923	82.1846
spinal cord	differentiation-committed oligodendrocyte precursor	39	0.0007	female	XIST	2.87904	0.606105	32	82.0513
axilla	T cell	9131	0.0884	female	XIST	2.3781	0.402544	7483	81.9516
lung	tracheobronchial serous cell	1990	0.0005	female	XIST	2.34011	0.387106	1626	81.7085
embryo	neural progenitor cell	9883	0.0518	female	XIST	2.2938	0.368285	8072	81.6756
lung	non-myelinating Schwann cell	49	0	female	XIST	2.45293	0.43295	40	81.6327
brain	glutamatergic neuron	1301488	0.0714	female	XIST	2.41961	0.419412	1061605	81.5686
eye	ON-bipolar cell	108616	0.0241	female	XIST	2.25026	0.350594	88552	81.5276
brain	neuron	2432025	0.1333	female	XIST	2.35986	0.39513	1980371	81.4289
axilla	macrophage	7871	0.0757	female	XIST	2.29799	0.369989	6408	81.4128
eye	secretory cell	447736	0.0991	female	XIST	2.20233	0.331116	364379	81.3826
heart	cardiac neuron	2468	0.0011	female	XIST	2.70433	0.535109	2008	81.3614
lung	airway submucosal gland duct basal cell	160	0	female	XIST	2.4952	0.450129	130	81.25
adipose tissue	stromal cell of endometrium	291	0.0009	female	XIST	2.73042	0.545712	236	81.0997
eye	Schwann cell	4080	0.0009	female	XIST	2.57436	0.482294	3303	80.9559
heart	precursor cell	24432	0.011	female	XIST	2.18839	0.325452	19741	80.7998
blood	precursor B cell	11626	0.001	female	XIST	2.24026	0.34653	9388	80.75
adipose tissue	endothelial cell	21596	0.0686	female	XIST	2.47581	0.442248	17416	80.6446
mucosa	glandular epithelial cell	380	0.0029	female	XIST	2.71065	0.537679	306	80.5263
heart	neuronal receptor cell	656	0.0003	female	XIST	2.48492	0.445948	526	80.1829
eye	diffuse bipolar 3a cell	7591	0.0017	female	XIST	2.19709	0.328987	6084	80.1475
adipose tissue	macrophage	19360	0.0611	female	XIST	2.43238	0.424601	15508	80.1033
endocrine gland	endothelial cell of lymphatic vessel	15	0	female	XIST	2.09661	0.288155	12	80
stomach	glandular cell of esophagus	10	0.0001	female	XIST	1.80485	0.169597	8	80
axilla	mononuclear phagocyte	8210	0.0774	female	XIST	2.28552	0.364923	6548	79.7564
axilla	myeloid leukocyte	8291	0.078	female	XIST	2.28231	0.363617	6602	79.6285
brain	neural cell	3607582	0.1932	female	XIST	2.41354	0.416945	2871720	79.6023
liver	intrahepatic cholangiocyte	4907	0.0034	female	XIST	2.5323	0.465202	3891	79.2949
lung	bronchial epithelial cell	357	0.0001	female	XIST	2.72475	0.543408	283	79.2717
eye	S cone cell	2911	0.0006	female	XIST	1.9975	0.247884	2305	79.1824
liver	endothelial cell of hepatic sinusoid	20220	0.0139	female	XIST	2.48899	0.447603	16002	79.1395
embryo	glial cell	129	0.0007	female	XIST	2.39456	0.40923	102	79.0698
blood	hematopoietic multipotent progenitor cell	775	0.0001	female	XIST	2.15682	0.312623	612	78.9677
eye	diffuse bipolar 3b cell	12228	0.0026	female	XIST	2.18015	0.322105	9654	78.95
endocrine gland	mature NK T cell	194	0.0004	female	XIST	2.33014	0.383054	153	78.866
liver	cholangiocyte	7773	0.0053	female	XIST	2.56503	0.478502	6130	78.8627
adipose tissue	myeloid cell	22777	0.0707	female	XIST	2.43226	0.424549	17960	78.8515
eye	retinal bipolar neuron	266197	0.0569	female	XIST	2.19874	0.329658	209241	78.6038
eye	bipolar neuron	266210	0.0569	female	XIST	2.19878	0.329674	209249	78.603
heart	fibroblast of cardiac tissue	42335	0.0186	female	XIST	2.42348	0.420983	33247	78.5331
eye	rod bipolar cell	34166	0.0073	female	XIST	2.17489	0.319967	26831	78.5313
brain	neuroblast (sensu Vertebrata)	10187	0.0005	female	XIST	2.65941	0.516857	7996	78.4922
adipose tissue	myeloid leukocyte	21810	0.0673	female	XIST	2.44059	0.427937	17102	78.4136
adipose tissue	professional antigen presenting cell	21509	0.0663	female	XIST	2.42826	0.422927	16851	78.3439
brain	epithelial cell of lung	973	0.0001	female	XIST	2.79686	0.57271	762	78.3145
tongue	capillary endothelial cell	23	0.0012	female	XIST	2.23855	0.345834	18	78.2609
embryo	microglial cell	124	0.0006	female	XIST	2.38744	0.406336	97	78.2258
brain	oligodendrocyte precursor cell	113698	0.006	female	XIST	2.39357	0.40883	88878	78.1702
adipose tissue	cell	182281	0.5587	female	XIST	2.42692	0.422383	141911	77.8529
eye	neuron	1177929	0.2493	female	XIST	2.1746	0.319848	916592	77.8139
eye	diffuse bipolar 2 cell	23809	0.005	female	XIST	2.17413	0.319657	18523	77.7983
heart	smooth muscle myoblast	795	0.0003	female	XIST	2.41148	0.416107	618	77.7358
liver	endothelial cell	49269	0.0332	female	XIST	2.39943	0.411211	38186	77.5051
eye	neural cell	1282663	0.2702	female	XIST	2.176	0.320419	993615	77.465
brain	oligodendrocyte	462519	0.0241	female	XIST	2.54604	0.470785	358182	77.4416
brain	cell	4026440	0.2096	female	XIST	2.40598	0.413873	3115211	77.3689
heart	adipocyte	7609	0.0033	female	XIST	2.48304	0.445188	5881	77.2901
endocrine gland	immature natural killer cell	44	0.0001	female	XIST	2.41359	0.416965	34	77.2727
liver	centrilobular region hepatocyte	30831	0.0207	female	XIST	2.70817	0.536669	23819	77.2567
adipose tissue	mononuclear phagocyte	22932	0.0697	female	XIST	2.42979	0.423546	17704	77.2022
musculature	perineurial cell	162	0.0003	female	XIST	2.47469	0.441794	125	77.1605
musculature	adipocyte	148	0.0003	female	XIST	2.64215	0.509841	114	77.027
spinal cord	neural cell	7473	0.1289	female	XIST	2.76625	0.560273	5756	77.024
eye	flat midget bipolar cell	52108	0.0109	female	XIST	2.15765	0.312959	40044	76.8481
exocrine gland	alternatively activated macrophage	367	0.0028	female	XIST	2.36369	0.396688	282	76.8392
heart	subcutaneous adipocyte	129	0.0001	female	XIST	2.46087	0.436177	99	76.7442
eye	mast cell	60	0	female	XIST	2.42646	0.422194	46	76.6667
eye	ON-blue cone bipolar cell	1312	0.0003	female	XIST	2.17956	0.321863	1005	76.6006
heart	neuron	5442	0.0023	female	XIST	2.59151	0.489262	4163	76.4976
small intestine	gut endothelial cell	484	0.0005	female	XIST	2.14563	0.308074	370	76.4463
adipose tissue	smooth muscle cell	4581	0.0138	female	XIST	2.51687	0.458934	3500	76.4025
eye	retinal cone cell	48983	0.0102	female	XIST	2.03371	0.262595	37417	76.3877
brain	macroglial cell	767691	0.0395	female	XIST	2.52981	0.46419	586257	76.3663
colon	gut endothelial cell	1209	0.0021	female	XIST	2.21816	0.337549	923	76.3441
ureter	endothelial cell	198	0.0043	female	XIST	2.18641	0.324646	151	76.2626
brain	connective tissue cell	9506	0.0005	female	XIST	2.43708	0.42651	7239	76.1519
kidney	kidney connecting tubule epithelial cell	9179	0.0061	female	XIST	2.3336	0.38446	6975	75.9887
kidney	kidney loop of Henle thin descending limb epithelial cell	12293	0.0082	female	XIST	2.41804	0.418773	9338	75.9619
spinal cord	cell	9058	0.154	female	XIST	2.72646	0.544103	6873	75.8777
mucosa	basal epithelial cell of tracheobronchial tree	6799	0.0488	female	XIST	2.75432	0.555423	5157	75.8494
adipose tissue	connective tissue cell	83197	0.2484	female	XIST	2.40703	0.414299	63093	75.8357
liver	plasma cell	2890	0.0019	female	XIST	2.94534	0.633045	2191	75.8131
eye	OFF-bipolar cell	119788	0.0247	female	XIST	2.15466	0.311745	90740	75.7505
brain	precursor cell	139530	0.0071	female	XIST	2.39963	0.411291	105627	75.702
breast	alternatively activated macrophage	8997	0.0029	female	XIST	2.22072	0.338591	6797	75.5474
blood	common lymphoid progenitor	4964	0.0004	female	XIST	2.13905	0.305401	3750	75.5439
placenta	contractile cell	17145	0.0265	female	XIST	2.43889	0.427244	12951	75.5381
eye	cell	1371541	0.2817	female	XIST	2.18496	0.32406	1035742	75.5167
eye	giant bipolar cell	7832	0.0016	female	XIST	2.12309	0.298918	5912	75.4852
brain	progenitor cell	127020	0.0064	female	XIST	2.37616	0.401754	95849	75.4598
hindlimb	endothelial cell of artery	134	0.0012	female	XIST	1.99203	0.245661	101	75.3731
brain	astrocyte	292062	0.0148	female	XIST	2.50823	0.455421	219924	75.3004
eye	diffuse bipolar 6 cell	6505	0.0013	female	XIST	2.16196	0.31471	4892	75.2037
tongue	blood vessel endothelial cell	100	0.0051	female	XIST	2.2386	0.345857	75	75
eye	non-pigmented ciliary epithelial cell	2319	0.0005	female	XIST	2.58582	0.486951	1738	74.9461
bone marrow	common lymphoid progenitor	2087	0.0029	female	XIST	2.31077	0.375183	1559	74.7005
blood	early pro-B cell	23269	0.0018	female	XIST	2.09556	0.287728	17381	74.6959
brain	cerebral cortex endothelial cell	3158	0.0002	female	XIST	2.27372	0.360127	2356	74.6042
kidney	papillary tips cell	251	0.0002	female	XIST	2.10193	0.290318	187	74.502
brain	brain vascular cell	2032	0.0001	female	XIST	2.25262	0.351552	1509	74.2618
blood	plasmacytoid dendritic cell, human	1067	0.0001	female	XIST	1.94943	0.228347	791	74.1331
musculature	non-myelinating Schwann cell	27	0.0001	female	XIST	2.47923	0.443639	20	74.0741
adipose tissue	hematopoietic cell	34618	0.1008	female	XIST	2.44464	0.429584	25603	73.9586
heart	epicardial adipocyte	2613	0.0011	female	XIST	2.39512	0.409461	1932	73.938
brain	glial cell	953259	0.0474	female	XIST	2.51505	0.458195	704782	73.9339
tongue	vein endothelial cell	69	0.0034	female	XIST	2.24979	0.350401	51	73.913
heart	neural cell	6958	0.0029	female	XIST	2.60355	0.494155	5142	73.9005
blood	granulocyte monocyte progenitor cell	2094	0.0002	female	XIST	1.93689	0.223251	1546	73.83
musculature	glial cell	221	0.0004	female	XIST	2.47896	0.443526	163	73.7557
kidney	parietal epithelial cell	2535	0.0016	female	XIST	2.37576	0.40159	1868	73.6884
esophagogastric junction	endothelial cell of artery	19	0.0012	female	XIST	2.58139	0.485152	14	73.6842
eye	glial cell	103872	0.0208	female	XIST	2.1923	0.32704	76470	73.6195
brain	neuron associated cell	967116	0.0479	female	XIST	2.51452	0.457978	711724	73.5924
adipose tissue	mononuclear cell	32625	0.0945	female	XIST	2.44646	0.430323	24004	73.5755
tongue	endothelial cell of vascular tree	121	0.006	female	XIST	2.19957	0.329994	89	73.5537
adipose tissue	leukocyte	33649	0.0974	female	XIST	2.4508	0.432087	24744	73.5356
adipose tissue	mast cell	992	0.0029	female	XIST	2.58918	0.488315	728	73.3871
breast	subcutaneous adipocyte	1548	0.0005	female	XIST	2.69	0.529288	1133	73.1912
endocrine gland	vein endothelial cell	662	0.0013	female	XIST	2.22173	0.339	484	73.1118
breast	adipocyte	11375	0.0035	female	XIST	2.29961	0.370647	8309	73.0462
kidney	neural cell	81	0.0001	female	XIST	2.54892	0.471958	59	72.8395
stomach	epithelial cell of esophagus	11	0.0001	female	XIST	1.80485	0.169597	8	72.7273
eye	Mueller cell	90538	0.0179	female	XIST	2.15049	0.310051	65804	72.6811
eye	radial glial cell	90553	0.0179	female	XIST	2.15045	0.310035	65813	72.679
eye	cone retinal bipolar cell	3916	0.0008	female	XIST	2.30487	0.372784	2846	72.6762
placenta	endothelial cell of lymphatic vessel	1502	0.0022	female	XIST	2.41095	0.415893	1090	72.5699
colon	mesenchymal cell	2580	0.0042	female	XIST	2.09424	0.287192	1869	72.4419
uterus	stromal cell of ovary	37110	0.2403	female	XIST	2.0366	0.263769	26871	72.4091
blood	hematopoietic oligopotent progenitor cell	7784	0.0006	female	XIST	2.08828	0.284773	5636	72.4049
placenta	endothelial cell of uterus	5167	0.0076	female	XIST	2.35084	0.391464	3740	72.3824
uterus	stromal cell	37196	0.2404	female	XIST	2.03672	0.263818	26881	72.2685
blood	pro-B cell	32564	0.0025	female	XIST	2.05495	0.271229	23531	72.2608
esophagus	interstitial cell of Cajal	54	0.0003	female	XIST	2.91818	0.622008	39	72.2222
endocrine gland	capillary endothelial cell	978	0.0019	female	XIST	2.40661	0.414129	706	72.1881
endocrine gland	blood vessel endothelial cell	1821	0.0035	female	XIST	2.30861	0.374305	1311	71.9934
endocrine gland	endothelial cell of vascular tree	1848	0.0035	female	XIST	2.30796	0.374042	1330	71.9697
liver	neuron	271	0.0002	female	XIST	2.07702	0.280195	195	71.9557
milk	fibroblast	139	0.0021	female	XIST	2.16151	0.314531	100	71.9424
pleural fluid	plasmacytoid dendritic cell	174	0.0015	female	XIST	1.90324	0.209579	125	71.8391
liver	endothelial cell of pericentral hepatic sinusoid	10512	0.0066	female	XIST	2.52307	0.461451	7548	71.8037
musculature	plasmacytoid dendritic cell	39	0.0001	female	XIST	2.12775	0.300809	28	71.7949
eye	diffuse bipolar 1 cell	15868	0.0031	female	XIST	2.12548	0.299886	11377	71.6978
kidney	kidney loop of Henle descending limb epithelial cell	13051	0.0082	female	XIST	2.41756	0.418579	9346	71.6114
liver	vascular associated smooth muscle cell	6618	0.0041	female	XIST	2.24251	0.347444	4737	71.5775
liver	perivascular cell	6625	0.0041	female	XIST	2.24233	0.347372	4738	71.517
adipose tissue	contractile cell	10324	0.0291	female	XIST	2.5231	0.461464	7383	71.513
breast	adipocyte of breast	9246	0.0028	female	XIST	2.22704	0.341158	6612	71.512
kidney	renal alpha-intercalated cell	1877	0.0012	female	XIST	2.60931	0.496497	1342	71.4971
kidney	kidney interstitial fibroblast	10362	0.0065	female	XIST	2.45284	0.432916	7404	71.4534
placenta	endothelial cell of vascular tree	1572	0.0023	female	XIST	2.42053	0.419783	1123	71.4377
kidney	neuron	14	0	female	XIST	2.17978	0.321952	10	71.4286
skin of body	subcutaneous adipocyte	14	0	female	XIST	2.78591	0.56826	10	71.4286
liver	neural cell	300	0.0002	female	XIST	2.07249	0.278357	214	71.3333
heart	regular atrial cardiac myocyte	23313	0.0093	female	XIST	2.58942	0.488416	16609	71.2435
large intestine	enteroendocrine cell of colon	66	0.0004	female	XIST	1.91598	0.214756	47	71.2121
liver	smooth muscle cell	6672	0.0041	female	XIST	2.24206	0.347261	4746	71.1331
blood	common dendritic progenitor	675	0.0001	female	XIST	1.89322	0.205508	480	71.1111
eye	microglial cell	2001	0.0004	female	XIST	2.47618	0.442397	1421	71.0145
musculature	subcutaneous adipocyte	79	0.0002	female	XIST	2.81058	0.578285	56	70.8861
small intestine	mesenchymal cell	22151	0.0195	female	XIST	2.05743	0.272233	15670	70.7417
liver	contractile cell	6796	0.0042	female	XIST	2.23726	0.345309	4798	70.6004
exocrine gland	memory B cell	2873	0.0203	female	XIST	2.05769	0.272342	2028	70.5882
endocrine gland	squamous epithelial cell	1976	0.0037	female	XIST	2.27613	0.361105	1394	70.5466
heart	mesothelial cell of epicardium	1733	0.0007	female	XIST	2.27921	0.362357	1220	70.3982
uterus	connective tissue cell	41244	0.2591	female	XIST	2.04573	0.267481	28977	70.2575
kidney	mesangial cell	13533	0.0084	female	XIST	2.86891	0.601988	9503	70.2209
lung	respiratory suprabasal cell	218	0	female	XIST	2.36937	0.398994	153	70.1835
nose	brush cell of trachea	20	0.0001	female	XIST	2.25512	0.35257	14	70
heart	mesothelial cell	2334	0.0009	female	XIST	2.2668	0.357314	1633	69.9657
heart	fibroblast	129121	0.0504	female	XIST	2.48785	0.447141	90255	69.8996
endocrine gland	fast muscle cell	86	0.0002	female	XIST	2.24809	0.349711	60	69.7674
bladder organ	capillary endothelial cell	66	0.0017	female	XIST	1.96553	0.234889	46	69.697
kidney	pericyte	17191	0.0105	female	XIST	2.79399	0.571545	11961	69.5771
kidney	kidney loop of Henle thick ascending limb epithelial cell	58037	0.0355	female	XIST	2.37772	0.402387	40351	69.5263
esophagogastric junction	mast cell	13	0.0008	female	XIST	2.01504	0.255011	9	69.2308
esophagus	macrophage	779	0.0036	female	XIST	2.88496	0.608511	537	68.9345
bladder organ	myofibroblast cell	1987	0.0515	female	XIST	1.99845	0.248266	1368	68.8475
tongue	squamous epithelial cell	109	0.0051	female	XIST	2.2386	0.345857	75	68.8073
esophagus	Schwann cell	192	0.0009	female	XIST	3.04401	0.673142	132	68.75
kidney	kidney distal convoluted tubule epithelial cell	15440	0.0093	female	XIST	2.38059	0.403553	10599	68.6464
blood	hematopoietic precursor cell	45741	0.0033	female	XIST	2.05665	0.271919	31346	68.5293
liver	midzonal region hepatocyte	14075	0.0083	female	XIST	2.54498	0.470355	9600	68.206
kidney	kidney loop of Henle epithelial cell	76912	0.0462	female	XIST	2.3731	0.40051	52455	68.2013
adipose tissue	preadipocyte	40623	0.109	female	XIST	2.46915	0.439542	27695	68.1757
adipose tissue	fibroblast	40651	0.109	female	XIST	2.4691	0.439523	27700	68.141
heart	vein endothelial cell	7231	0.0028	female	XIST	2.44299	0.428911	4927	68.1372
spinal cord	mural cell	354	0.0054	female	XIST	2.42013	0.419623	241	68.0791
small intestine	peripheral nervous system neuron	1196	0.001	female	XIST	1.93348	0.221867	814	68.0602
embryo	ependymal cell	837	0.0036	female	XIST	2.02416	0.258717	569	67.9809
eye	retinal pigment epithelial cell	766	0.0001	female	XIST	2.26886	0.358154	520	67.8851
mucosa	Schwann cell	56	0.0004	female	XIST	2.78932	0.569645	38	67.8571
heart	endothelial cell of lymphatic vessel	1897	0.0007	female	XIST	2.54179	0.469061	1285	67.7385
kidney	epithelial cell of distal tubule	79234	0.0472	female	XIST	2.36717	0.398099	53665	67.7298
bone marrow	stromal cell	133	0.0002	female	XIST	2.25672	0.353217	90	67.6692
heart	regular ventricular cardiac myocyte	110347	0.0417	female	XIST	2.27351	0.36004	74650	67.6502
esophagus	neural cell	204	0.0009	female	XIST	3.03542	0.669651	138	67.6471
adipose tissue	pericyte	5743	0.0153	female	XIST	2.52871	0.463745	3883	67.6127
kidney	kidney loop of Henle ascending limb epithelial cell	63794	0.0379	female	XIST	2.36386	0.396757	43066	67.5079
eye	eye photoreceptor cell	455923	0.0836	female	XIST	2.07376	0.278872	307527	67.4515
eye	photoreceptor cell	456246	0.0837	female	XIST	2.07424	0.279066	307720	67.4461
kidney	kidney glomerular epithelial cell	9185	0.0055	female	XIST	2.24142	0.347003	6191	67.4034
endocrine gland	CD4-positive helper T cell	4254	0.0076	female	XIST	2.16808	0.317198	2864	67.3249
eye	epithelial cell of lacrimal sac	52	0	female	XIST	1.80408	0.169284	35	67.3077
kidney	renal interstitial pericyte	3655	0.0022	female	XIST	2.50415	0.453763	2458	67.2503
axilla	secretory cell	82	0.0007	female	XIST	1.91586	0.214708	55	67.0732
lung	bronchial goblet cell	94	0	female	XIST	2.30519	0.372916	63	67.0213
heart	cardiac muscle cell	218831	0.0819	female	XIST	2.29968	0.370677	146652	67.0161
brain	differentiation-committed oligodendrocyte precursor	397	0	female	XIST	2.08726	0.284355	266	67.0025
kidney	mesonephric nephron tubule epithelial cell	569	0.0003	female	XIST	2.07002	0.277349	381	66.9596
stomach	P/D1 enteroendocrine cell	647	0.005	female	XIST	2.07979	0.281321	433	66.9243
heart	myeloid cell	46407	0.0173	female	XIST	2.45467	0.433657	31026	66.8563
endocrine gland	endothelial cell of artery	181	0.0003	female	XIST	2.08432	0.283163	121	66.8508
stomach	memory B cell	434	0.0034	female	XIST	2.13864	0.305235	290	66.8203
kidney	fibroblast	12193	0.0072	female	XIST	2.42264	0.42064	8131	66.6858
axilla	mast cell	81	0.0006	female	XIST	1.89249	0.205208	54	66.6667
endocrine gland	mesothelial cell	12	0	female	XIST	2.08398	0.283022	8	66.6667
spinal cord	perivascular cell	402	0.006	female	XIST	2.41655	0.418167	268	66.6667
tongue	endothelial cell of lymphatic vessel	21	0.0009	female	XIST	1.99045	0.245017	14	66.6667
eye	retinal rod cell	406375	0.0734	female	XIST	2.07919	0.281078	269823	66.3975
heart	connective tissue cell	183806	0.0681	female	XIST	2.48044	0.444128	122005	66.377
blood	CD8-positive, alpha-beta cytokine secreting effector T cell	1377	0.0001	female	XIST	2.05864	0.272726	912	66.2309
heart	mast cell	1686	0.0006	female	XIST	2.63276	0.506028	1116	66.1922
heart	immature innate lymphoid cell	5057	0.0019	female	XIST	2.38907	0.407001	3340	66.0471
neck	malignant cell	10249	0.5348	female	XIST	1.75396	0.148919	6764	65.9967
stomach	B cell	441	0.0034	female	XIST	2.144	0.307413	291	65.9864
heart	cell	663573	0.2444	female	XIST	2.39531	0.409535	437713	65.9631
breast	elicited macrophage	17824	0.005	female	XIST	2.10008	0.289565	11747	65.9055
eye	macrophage	4160	0.0007	female	XIST	2.49837	0.451417	2740	65.8654
brain	efferent neuron	124945	0.0055	female	XIST	2.37051	0.399459	82198	65.7873
exocrine gland	elicited macrophage	679	0.0045	female	XIST	2.28843	0.366104	446	65.6848
heart	muscle cell	236225	0.0865	female	XIST	2.3011	0.371254	154942	65.5909
liver	glial cell	29	0	female	XIST	2.02606	0.259487	19	65.5172
brain	Purkinje cell	123007	0.0054	female	XIST	2.36252	0.396211	80522	65.4613
breast	classical monocyte	4148	0.0012	female	XIST	2.03847	0.264531	2714	65.4291
lung	tracheobronchial goblet cell	107	0	female	XIST	2.27329	0.359951	70	65.4206
eye	professional antigen presenting cell	4219	0.0008	female	XIST	2.49436	0.449786	2760	65.4183
exocrine gland	mature B cell	3992	0.0261	female	XIST	2.04933	0.268942	2608	65.3307
adipose tissue	B cell	279	0.0007	female	XIST	2.539	0.467925	182	65.233
eye	corneal endothelial cell	3525	0.0006	female	XIST	2.35753	0.394182	2299	65.2199
brain	Bergmann glial cell	3137	0.0001	female	XIST	2.63022	0.504992	2044	65.1578
vasculature	collagen secreting cell	295	0.0007	female	XIST	2.55694	0.475217	192	65.0847
endocrine gland	endothelial cell	2632	0.0045	female	XIST	2.23932	0.346149	1711	65.0076
brain	epithelial cell	32637	0.0014	female	XIST	2.46135	0.436372	21214	64.9998
adipose tissue	lymphocyte	9693	0.0248	female	XIST	2.49333	0.449368	6300	64.9954
kidney	podocyte	6642	0.0038	female	XIST	2.18375	0.323565	4316	64.9804
heart	lymphoid lineage restricted progenitor cell	1235	0.0004	female	XIST	2.42883	0.423157	801	64.8583
musculature	mesenchymal stem cell	9278	0.0162	female	XIST	2.04653	0.267805	6014	64.82
kidney	perivascular cell	19831	0.0113	female	XIST	2.72464	0.543363	12840	64.7471
exocrine gland	ionocyte	312	0.002	female	XIST	2.30074	0.371106	202	64.7436
heart	cardiac endothelial cell	11412	0.0041	female	XIST	2.40908	0.415132	7387	64.7301
tongue	fibroblast	119	0.0052	female	XIST	2.19615	0.328607	77	64.7059
endocrine gland	cortical thymic epithelial cell	5513	0.0094	female	XIST	1.8441	0.185545	3567	64.7016
heart	hematopoietic cell	67634	0.0244	female	XIST	2.4528	0.432899	43756	64.6953
lung	IgG plasma cell	175	0	female	XIST	2.82016	0.582179	113	64.5714
heart	hematopoietic precursor cell	1244	0.0004	female	XIST	2.42821	0.422904	803	64.5498
hindlimb	endothelial cell of lymphatic vessel	45	0.0003	female	XIST	1.97742	0.239724	29	64.4444
musculature	Schwann cell	59	0.0001	female	XIST	2.49298	0.449226	38	64.4068
eye	myeloid cell	4646	0.0008	female	XIST	2.46558	0.43809	2991	64.378
placenta	epithelial cell	25473	0.0335	female	XIST	2.41004	0.415523	16366	64.2484
eye	myeloid leukocyte	4615	0.0008	female	XIST	2.46585	0.438202	2965	64.247
ureter	basal cell of urothelium	2417	0.0437	female	XIST	1.93253	0.221481	1552	64.2118
eye	retinal astrocyte	117	0	female	XIST	2.29604	0.369197	75	64.1026
colon	neuron	103	0.0001	female	XIST	2.04179	0.265878	66	64.0777
breast	activated CD8-positive, alpha-beta T cell	996	0.0003	female	XIST	2.43513	0.425717	638	64.0562
exocrine gland	endothelial cell of lymphatic vessel	89	0.0006	female	XIST	2.11221	0.294495	57	64.0449
kidney	secretory cell	7048	0.004	female	XIST	2.18798	0.325284	4508	63.9614
heart	contractile cell	283105	0.1011	female	XIST	2.32334	0.380291	181051	63.9519
eye	OFFx cell	5406	0.0009	female	XIST	2.03886	0.264687	3450	63.818
brain	central nervous system macrophage	175433	0.0075	female	XIST	2.42761	0.422662	111956	63.817
brain	tissue-resident macrophage	175640	0.0075	female	XIST	2.42755	0.422636	112031	63.7844
brain	microglial cell	174949	0.0075	female	XIST	2.42687	0.422363	111537	63.754
eye	mononuclear phagocyte	4612	0.0008	female	XIST	2.46292	0.437012	2939	63.7251
bladder organ	B cell	245	0.0059	female	XIST	2.1748	0.319929	156	63.6735
colon	type L enteroendocrine cell	11	0	female	XIST	1.81814	0.174997	7	63.6364
lung	serous secreting cell	3632	0.0007	female	XIST	2.22131	0.338828	2307	63.5187
exocrine gland	CD8-positive, alpha-beta regulatory T cell	52	0.0003	female	XIST	2.57165	0.481196	33	63.4615
intestine	endothelial cell of lymphatic vessel	101	0.0016	female	XIST	2.61284	0.497931	64	63.3663
lung	type I pneumocyte	16457	0.0032	female	XIST	2.25008	0.350519	10426	63.353
hindlimb	endothelial cell of vascular tree	690	0.0051	female	XIST	1.91599	0.21476	437	63.3333
hindlimb	blood vessel endothelial cell	645	0.0048	female	XIST	1.91163	0.212986	408	63.2558
kidney	kidney interstitial cell	20472	0.0114	female	XIST	2.41278	0.416634	12948	63.2474
heart	epithelial cell	112619	0.0398	female	XIST	2.42293	0.420761	71222	63.2415
tongue	basal cell	5357	0.2285	female	XIST	2.18773	0.325184	3387	63.2257
exocrine gland	B cell	4656	0.0295	female	XIST	2.09842	0.28889	2943	63.2088
lung	lung perichondrial fibroblast	144	0	female	XIST	2.54344	0.469729	91	63.1944
kidney	connective tissue cell	36968	0.0206	female	XIST	2.54649	0.47097	23354	63.1736
musculature	capillary endothelial cell	3282	0.0056	female	XIST	2.45648	0.434391	2073	63.1627
brain	cerebellar granule cell	25955	0.0011	female	XIST	2.1109	0.293962	16381	63.1131
heart	endothelial cell	110276	0.0389	female	XIST	2.42661	0.422256	69588	63.1035
brain	dopaminergic neuron	3842	0.0002	female	XIST	1.85345	0.189345	2422	63.0401
brain	squamous epithelial cell	714	0	female	XIST	2.66358	0.518551	448	62.7451
brain	blood vessel endothelial cell	713	0	female	XIST	2.66294	0.518289	447	62.6928
liver	endothelial cell of periportal hepatic sinusoid	2952	0.0016	female	XIST	2.3447	0.388968	1850	62.6694
adipose tissue	immature NK T cell	2011	0.005	female	XIST	2.47623	0.442419	1260	62.6554
adipose tissue	dendritic cell	2146	0.0053	female	XIST	2.38131	0.403847	1342	62.5349
vasculature	endothelial cell of vascular tree	9713	0.0233	female	XIST	1.94551	0.226753	6068	62.473
vasculature	endothelial cell of artery	9712	0.0233	female	XIST	1.9456	0.22679	6067	62.4691
breast	basal cell	123785	0.0329	female	XIST	2.22265	0.339374	77207	62.3719
musculature	fibroblast	16918	0.0285	female	XIST	2.28238	0.363647	10550	62.3596
breast	activated CD4-positive, alpha-beta T cell	1977	0.0005	female	XIST	2.33833	0.386382	1232	62.3166
kidney	renal beta-intercalated cell	405	0.0002	female	XIST	2.39287	0.408546	252	62.2222
musculature	stem cell	18982	0.0319	female	XIST	2.14503	0.307833	11809	62.2116
exocrine gland	professional antigen presenting cell	5440	0.0338	female	XIST	2.09644	0.288087	3375	62.0404
bladder organ	macrophage	4884	0.1142	female	XIST	2.05969	0.273154	3030	62.0393
musculature	connective tissue cell	29277	0.049	female	XIST	2.20527	0.332312	18157	62.018
bladder organ	professional antigen presenting cell	4904	0.1146	female	XIST	2.0592	0.272955	3041	62.0106
bladder organ	mononuclear phagocyte	4905	0.1146	female	XIST	2.0592	0.272955	3041	61.998
bladder organ	contractile cell	2945	0.0688	female	XIST	1.98376	0.2423	1825	61.9694
lymph node	type I NK T cell	728	0.0011	female	XIST	2.02921	0.260768	451	61.9505
brain	pericyte	2933	0.0001	female	XIST	2.33534	0.385165	1817	61.9502
colon	peripheral nervous system neuron	89	0.0001	female	XIST	2.0311	0.261537	55	61.7978
heart	innate lymphoid cell	8079	0.0028	female	XIST	2.32845	0.382368	4991	61.7774
kidney	glomerular endothelial cell	102	0.0001	female	XIST	2.40017	0.411511	63	61.7647
endocrine gland	memory B cell	2890	0.0047	female	XIST	2.17272	0.319084	1784	61.7301
musculature	precursor cell	19955	0.0332	female	XIST	2.15346	0.311259	12313	61.7038
ureter	fibroblast	1402	0.0243	female	XIST	1.99098	0.245232	863	61.5549
adipose tissue	T cell	7585	0.0184	female	XIST	2.53171	0.464964	4668	61.5425
milk	B cell	52	0.0007	female	XIST	2.20124	0.330675	32	61.5385
musculature	myelinating Schwann cell	13	0	female	XIST	2.13464	0.303609	8	61.5385
spinal cord	cerebellar granule cell	91	0.0013	female	XIST	2.8646	0.600238	56	61.5385
lung	plasmacytoid dendritic cell, human	49	0	female	XIST	1.84387	0.185454	30	61.2245
colon	pericyte	1773	0.0025	female	XIST	2.08276	0.282528	1085	61.1957
spinal cord	glutamatergic neuron	201	0.0028	female	XIST	2.71026	0.537517	123	61.194
brain	mesenchymal cell	353	0	female	XIST	2.5347	0.466181	216	61.1898
esophagus	myeloid leukocyte	1101	0.0045	female	XIST	2.7712	0.562282	673	61.1262
ureter	smooth muscle cell	352	0.0061	female	XIST	1.99552	0.247076	215	61.0795
musculature	endothelial cell of artery	184	0.0003	female	XIST	2.08866	0.284928	112	60.8696
ovary	endothelial cell of lymphatic vessel	46	0.0004	female	XIST	2.07646	0.279968	28	60.8696
bone marrow	plasmacytoid dendritic cell, human	5364	0.006	female	XIST	2.12961	0.301567	3259	60.7569
heart	dendritic cell	254	0.0001	female	XIST	2.53507	0.466331	154	60.6299
ovary	pericyte	3578	0.0344	female	XIST	2.10499	0.29156	2169	60.6205
ureter	mature NK T cell	452	0.0077	female	XIST	2.03962	0.264997	274	60.6195
ovary	supporting cell	3579	0.0344	female	XIST	2.10499	0.29156	2169	60.6035
bladder organ	mature NK T cell	484	0.011	female	XIST	2.13404	0.303365	293	60.5372
bone marrow	late pro-B cell	4139	0.0046	female	XIST	2.27151	0.359228	2503	60.4735
brain	granule cell	56276	0.0023	female	XIST	2.35197	0.391926	33990	60.3987
esophagus	myeloid cell	1116	0.0045	female	XIST	2.76924	0.561487	674	60.3943
neck	endothelial cell	159	0.0076	female	XIST	2.16864	0.317427	96	60.3774
heart	natural killer cell	1478	0.0005	female	XIST	2.28654	0.365338	892	60.3518
musculature	dendritic cell	536	0.0009	female	XIST	2.08693	0.284222	323	60.2612
heart	squamous epithelial cell	48511	0.0163	female	XIST	2.35334	0.392482	29233	60.2606
vasculature	endothelial cell	12293	0.0284	female	XIST	1.96988	0.236657	7404	60.2294
esophagus	professional antigen presenting cell	1174	0.0048	female	XIST	2.7467	0.552326	707	60.2215
musculature	blood vessel endothelial cell	4477	0.0073	female	XIST	2.41076	0.415815	2693	60.1519
adipose tissue	alpha-beta T cell	2123	0.005	female	XIST	2.46695	0.438648	1276	60.1036
musculature	squamous epithelial cell	4482	0.0073	female	XIST	2.41076	0.415815	2693	60.0848
hindlimb	vein endothelial cell	511	0.0036	female	XIST	1.88517	0.202236	307	60.0783
musculature	endothelial cell of vascular tree	8651	0.014	female	XIST	2.29593	0.369152	5192	60.0162
exocrine gland	pro-T cell	60	0.0004	female	XIST	2.33963	0.386908	36	60
eye	lens fiber cell	35	0	female	XIST	2.46844	0.439254	21	60
lamina propria	non-classical monocyte	10	0.0003	female	XIST	1.95795	0.23181	6	60
musculature	eosinophil	35	0.0001	female	XIST	2.29659	0.36942	21	60
ureter	mast cell	35	0.0006	female	XIST	1.92296	0.217592	21	60
musculature	epithelial cell	8656	0.014	female	XIST	2.29593	0.369152	5192	59.9815
adipose tissue	monocyte	1426	0.0034	female	XIST	2.45884	0.435353	854	59.8878
kidney	contractile cell	23619	0.0125	female	XIST	2.6447	0.510879	14143	59.8798
lymph node	mature NK T cell	1156	0.0017	female	XIST	2.03248	0.262098	692	59.8616
colon	neural cell	2138	0.0029	female	XIST	2.11284	0.29475	1279	59.8223
heart	blood vessel endothelial cell	46177	0.0154	female	XIST	2.35846	0.394563	27600	59.77
endocrine gland	muscle cell	1190	0.0019	female	XIST	2.17387	0.319553	711	59.7479
musculature	skeletal muscle satellite stem cell	9704	0.0156	female	XIST	2.24726	0.349374	5795	59.7176
eye	hematopoietic cell	6297	0.001	female	XIST	2.40451	0.413276	3760	59.711
lung	myoepithelial cell	568	0.0001	female	XIST	2.23384	0.343922	339	59.6831
breast	stem cell	132579	0.0337	female	XIST	2.21217	0.335115	79100	59.6625
endocrine gland	vascular associated smooth muscle cell	1070	0.0017	female	XIST	2.1684	0.317329	638	59.6262
bone marrow	basophil mast progenitor cell	1109	0.0012	female	XIST	2.12016	0.297727	661	59.6032
esophagus	enteric smooth muscle cell	2334	0.0094	female	XIST	2.62347	0.502253	1391	59.5973
eye	leukocyte	6266	0.001	female	XIST	2.40431	0.413192	3734	59.5914
heart	endothelial cell of vascular tree	51691	0.0172	female	XIST	2.38685	0.406098	30800	59.5848
vasculature	epithelial cell	12436	0.0284	female	XIST	1.96992	0.236676	7408	59.569
eye	ganglion interneuron	294	0	female	XIST	2.8019	0.57476	175	59.5238
heart	endothelial cell of artery	11637	0.0039	female	XIST	2.27166	0.35929	6922	59.4827
mucosa	endothelial cell of vascular tree	19372	0.1091	female	XIST	2.31756	0.377943	11522	59.4776
musculature	macrophage	4235	0.0068	female	XIST	2.314	0.376497	2518	59.4569
musculature	skeletal muscle satellite cell	9988	0.016	female	XIST	2.26156	0.355185	5935	59.4213
kidney	endothelial cell of vascular tree	2761	0.0014	female	XIST	2.60184	0.493462	1640	59.3988
exocrine gland	IgG plasma cell	593	0.0035	female	XIST	2.16723	0.316853	352	59.3592
neck	cell	12648	0.5935	female	XIST	1.7708	0.15576	7507	59.3533
esophagogastric junction	blood vessel endothelial cell	91	0.0045	female	XIST	2.16101	0.314324	54	59.3407
eye	mononuclear cell	6062	0.001	female	XIST	2.40353	0.412877	3594	59.2874
uterus	endothelial cell of uterus	7577	0.0402	female	XIST	2.02975	0.260987	4491	59.2715
brain	macrophage	275058	0.011	female	XIST	2.34238	0.388028	162727	59.161
heart	mural cell	81338	0.0268	female	XIST	2.46622	0.438351	48076	59.1064
brain	professional antigen presenting cell	277627	0.011	female	XIST	2.34077	0.387373	163819	59.0069
fallopian tube	stromal cell	58412	0.1573	female	XIST	2.0998	0.289453	34452	58.981
endocrine gland	epithelial cell of thymus	6496	0.0101	female	XIST	1.85449	0.189769	3831	58.9748
endocrine gland	smooth muscle cell	1104	0.0017	female	XIST	2.16703	0.316773	651	58.9674
endocrine gland	neuron	290	0.0005	female	XIST	1.78487	0.161476	171	58.9655
lung	lung goblet cell	448	0.0001	female	XIST	2.55695	0.475219	264	58.9286
intestine	endothelial cell of vascular tree	304	0.0045	female	XIST	2.6704	0.521321	179	58.8816
mucosa	capillary endothelial cell	2418	0.0135	female	XIST	2.21011	0.334278	1422	58.8089
brain	myeloid leukocyte	289270	0.0114	female	XIST	2.33454	0.384843	170092	58.8004
kidney	renal principal cell	31517	0.0163	female	XIST	2.22995	0.342339	18532	58.8
chest wall	cell	18663	0.5879	female	XIST	2.5808	0.484913	10972	58.7901
brain	myeloid cell	289562	0.0115	female	XIST	2.33438	0.384777	170203	58.7795
endocrine gland	neural cell	650	0.001	female	XIST	1.80609	0.170098	382	58.7692
heart	perivascular cell	84204	0.0276	female	XIST	2.46212	0.436685	49486	58.7692
mucosa	epithelial cell	33166	0.1846	female	XIST	2.43656	0.426299	19490	58.765
esophagogastric junction	enteroendocrine cell	97	0.0048	female	XIST	1.91716	0.215233	57	58.7629
ureter	leukocyte	5346	0.0885	female	XIST	2.01005	0.252984	3141	58.7542
lung	seromucus secreting cell	6402	0.0012	female	XIST	2.19217	0.326988	3761	58.7473
musculature	conventional dendritic cell	487	0.0008	female	XIST	2.07267	0.278427	286	58.7269
tongue	connective tissue cell	201	0.008	female	XIST	2.16983	0.317912	118	58.7065
brain	mononuclear phagocyte	290896	0.0115	female	XIST	2.33313	0.38427	170769	58.7045
musculature	mononuclear phagocyte	5460	0.0087	female	XIST	2.27338	0.359988	3205	58.6996
musculature	professional antigen presenting cell	5048	0.008	female	XIST	2.28477	0.364618	2960	58.6371
endocrine gland	glial cell	360	0.0006	female	XIST	1.82328	0.177087	211	58.6111
lung	vein endothelial cell	15889	0.0029	female	XIST	2.28272	0.363783	9312	58.6066
bladder organ	myeloid leukocyte	5872	0.1296	female	XIST	2.0575	0.272265	3440	58.5831
uterus	mature NK T cell	53	0.0003	female	XIST	2.04851	0.268612	31	58.4906
lung	club cell	5673	0.001	female	XIST	2.23966	0.346286	3317	58.4699
nose	brush cell of trachebronchial tree	36	0.0001	female	XIST	2.16271	0.315015	21	58.3333
ureter	myeloid leukocyte	36	0.0006	female	XIST	1.92296	0.217592	21	58.3333
lymph node	intermediate monocyte	247	0.0004	female	XIST	2.01464	0.254846	144	58.2996
breast	non-classical monocyte	987	0.0002	female	XIST	2.00246	0.249899	575	58.2573
mucosa	neural cell	86	0.0005	female	XIST	2.68845	0.528657	50	58.1395
small intestine	endothelial cell of artery	372	0.0003	female	XIST	2.13061	0.301972	216	58.0645
heart	CD14-positive, CD16-positive monocyte	1024	0.0003	female	XIST	2.05216	0.270092	594	58.0078
bladder organ	smooth muscle cell	250	0.0055	female	XIST	2.02662	0.259716	145	58
kidney	renal intercalated cell	18803	0.0096	female	XIST	2.3079	0.374018	10901	57.9748
placenta	endothelial cell	10046	0.0119	female	XIST	2.3192	0.378608	5818	57.9136
brain	contractile cell	4397	0.0002	female	XIST	2.35203	0.391948	2546	57.9031
breast	mast cell	1382	0.0003	female	XIST	2.34701	0.389907	800	57.8871
mucosa	macrophage	1632	0.0089	female	XIST	2.57367	0.482013	944	57.8431
kidney	kidney collecting duct intercalated cell	16106	0.0082	female	XIST	2.26214	0.355423	9307	57.7859
heart	leukocyte	33098	0.0107	female	XIST	2.43315	0.424912	19124	57.7799
brain	neuronal brush cell	5300	0.0002	female	XIST	2.72852	0.544941	3059	57.717
heart	capillary endothelial cell	27309	0.0088	female	XIST	2.37017	0.39932	15751	57.677
heart	lymphocyte	17799	0.0057	female	XIST	2.44924	0.43145	10265	57.6718
brain	hippocampal granule cell	10404	0.0004	female	XIST	2.60138	0.493276	5995	57.6221
bone marrow	plasmacytoid dendritic cell	6295	0.0067	female	XIST	2.10806	0.292807	3627	57.6172
esophagus	contractile cell	3122	0.0121	female	XIST	2.61584	0.499149	1798	57.5913
bladder organ	blood vessel endothelial cell	332	0.0072	female	XIST	1.97745	0.239732	191	57.5301
exocrine gland	basal cell	593	0.0034	female	XIST	2.0958	0.287826	341	57.5042
kidney	kidney collecting duct cell	45781	0.0232	female	XIST	2.22791	0.341511	26305	57.4583
intestine	stromal cell	2221	0.0319	female	XIST	2.79417	0.571616	1276	57.4516
kidney	kidney collecting duct epithelial cell	45756	0.0231	female	XIST	2.22804	0.341565	26287	57.4504
esophagus	smooth muscle cell	2883	0.0112	female	XIST	2.58924	0.488341	1655	57.4055
kidney	kidney collecting duct principal cell	29612	0.0149	female	XIST	2.20937	0.333978	16979	57.3382
kidney	collagen secreting cell	316	0.0002	female	XIST	2.46335	0.437186	181	57.2785
musculature	phagocyte	5633	0.0087	female	XIST	2.27148	0.359216	3223	57.2164
eye	columnar/cuboidal epithelial cell	18416	0.0029	female	XIST	2.42966	0.423494	10528	57.1677
brain	endothelial cell	22806	0.0009	female	XIST	2.34978	0.391035	13027	57.1209
lung	alveolar capillary type 1 endothelial cell	2479	0.0004	female	XIST	2.26008	0.354585	1416	57.1198
kidney	taste receptor cell	3015	0.0015	female	XIST	2.58465	0.486478	1722	57.1144
kidney	kidney interstitial alternatively activated macrophage	2257	0.0011	female	XIST	2.46414	0.437504	1289	57.1112
kidney	endo-epithelial cell	3016	0.0015	female	XIST	2.58465	0.486478	1722	57.0955
mucosa	endothelial cell of venule	10139	0.0548	female	XIST	2.15409	0.311515	5785	57.0569
uterus	endothelial cell of lymphatic vessel	86	0.0004	female	XIST	1.9067	0.210985	49	56.9767
colon	fibroblast	11517	0.0148	female	XIST	2.21224	0.335145	6555	56.9159
brain	stellate neuron	15745	0.0006	female	XIST	2.49909	0.451708	8948	56.8307
uterus	macrophage	389	0.002	female	XIST	1.98061	0.241019	221	56.8123
kidney	capillary endothelial cell	81	0	female	XIST	2.31939	0.378685	46	56.7901
uterus	myometrial cell	199	0.001	female	XIST	2.01718	0.255879	113	56.7839
brain	mural cell	4917	0.0002	female	XIST	2.26705	0.357415	2792	56.7826
bone marrow	hematopoietic stem cell	4339	0.0046	female	XIST	2.12045	0.297845	2463	56.7642
bone marrow	stem cell	4340	0.0046	female	XIST	2.12045	0.297845	2463	56.7512
mucosa	regulatory T cell	462	0.0025	female	XIST	2.19899	0.32976	262	56.71
musculature	myeloid leukocyte	5618	0.0086	female	XIST	2.30365	0.372289	3182	56.6394
musculature	myeloid cell	5630	0.0086	female	XIST	2.30382	0.372359	3186	56.5897
eye	pigmented ciliary epithelial cell	6224	0.001	female	XIST	2.4184	0.418918	3520	56.5553
lung	intermediate monocyte	255	0	female	XIST	2.01493	0.254965	144	56.4706
bone marrow	pre-conventional dendritic cell	2277	0.0024	female	XIST	1.97353	0.238143	1285	56.4339
eye	smooth muscle cell of sphincter of pupil	312	0	female	XIST	2.44357	0.429146	176	56.4103
mucosa	endothelial cell of lymphatic vessel	2336	0.0125	female	XIST	2.58594	0.487	1317	56.3784
liver	mature NK T cell	4743	0.0023	female	XIST	2.21794	0.337461	2670	56.2935
kidney	alternatively activated macrophage	2290	0.0011	female	XIST	2.46414	0.437504	1289	56.2882
bone marrow	group 3 innate lymphoid cell	16	0	female	XIST	2.0972	0.288394	9	56.25
intestine	connective tissue cell	2288	0.0322	female	XIST	2.79387	0.571496	1287	56.25
skin of body	epithelial cell of sweat gland	32	0	female	XIST	3.25918	0.760579	18	56.25
spinal cord	vascular associated smooth muscle cell	48	0.0006	female	XIST	2.38457	0.405173	27	56.25
mucosa	blood vessel endothelial cell	4370	0.0233	female	XIST	2.17616	0.320481	2458	56.2471
uterus	mononuclear phagocyte	395	0.002	female	XIST	1.98189	0.241537	222	56.2025
uterus	professional antigen presenting cell	395	0.002	female	XIST	1.98189	0.241537	222	56.2025
esophagus	mononuclear phagocyte	1371	0.0052	female	XIST	2.668	0.520346	770	56.1634
esophagus	fibroblast	3853	0.0146	female	XIST	2.75396	0.555278	2161	56.0862
breast	inflammatory macrophage	8827	0.0021	female	XIST	1.93441	0.222245	4950	56.0779
endocrine gland	contractile cell	1362	0.002	female	XIST	2.14014	0.305844	763	56.0206
brain	vein endothelial cell	75	0	female	XIST	2.0551	0.271288	42	56
bladder organ	mononuclear cell	9397	0.1982	female	XIST	2.03926	0.264851	5262	55.9966
liver	cell	754534	0.3669	female	XIST	2.38942	0.407144	422449	55.9881
heart	mononuclear cell	29475	0.0092	female	XIST	2.41876	0.419067	16498	55.9729
stomach	gamma-delta T cell	286	0.0019	female	XIST	2.34997	0.391112	160	55.9441
esophagus	enteroendocrine cell	59	0.0002	female	XIST	2.14448	0.307609	33	55.9322
brain	mononuclear cell	330029	0.0124	female	XIST	2.32776	0.382088	184465	55.8936
spleen	mature NK T cell	1648	0.0029	female	XIST	2.05709	0.272097	921	55.8859
brain	leukocyte	330840	0.0124	female	XIST	2.32799	0.38218	184820	55.8639
brain	hematopoietic cell	331134	0.0124	female	XIST	2.32785	0.382122	184932	55.8481
heart	pericyte	45672	0.0142	female	XIST	2.45014	0.431817	25501	55.8351
kidney	stromal cell	387	0.0002	female	XIST	2.49916	0.451736	216	55.814
milk	lymphocyte	837	0.0098	female	XIST	2.20279	0.331302	467	55.7945
brain	perivascular cell	5323	0.0002	female	XIST	2.27421	0.360324	2968	55.758
bone marrow	CD16-positive, CD56-dim natural killer cell, human	4982	0.0051	female	XIST	2.06775	0.276428	2776	55.7206
esophagogastric junction	vein endothelial cell	70	0.0033	female	XIST	2.02102	0.257441	39	55.7143
uterus	myeloid leukocyte	399	0.002	female	XIST	1.98159	0.241415	222	55.6391
lung	mucus secreting cell of tracheobronchial tree submucosal gland	444	0.0001	female	XIST	1.75336	0.148674	247	55.6306
lung	epithelial cell of lower respiratory tract	28063	0.0048	female	XIST	2.60168	0.493395	15609	55.6213
lung	pulmonary capillary endothelial cell	2978	0.0005	female	XIST	2.23551	0.344598	1656	55.6078
ovary	contractile cell	4346	0.0383	female	XIST	2.09406	0.287118	2415	55.5683
bladder organ	plasmacytoid dendritic cell	18	0.0004	female	XIST	1.86279	0.193143	10	55.5556
uterus	glandular epithelial cell	13100	0.065	female	XIST	1.94208	0.225363	7269	55.4885
uterus	secretory cell	13111	0.065	female	XIST	1.94212	0.225377	7270	55.4496
breast	macrophage	30469	0.0072	female	XIST	2.07513	0.27943	16887	55.4235
milk	T cell	785	0.0092	female	XIST	2.2029	0.331348	435	55.414
heart	Schwann cell	148	0	female	XIST	2.83763	0.589278	82	55.4054
colon	intestinal tuft cell	325	0.0004	female	XIST	2.21685	0.337015	180	55.3846
lung	bronchus fibroblast of lung	3569	0.0006	female	XIST	2.02379	0.258564	1976	55.3656
endocrine gland	mature B cell	4442	0.0065	female	XIST	2.13578	0.304072	2459	55.3579
bone marrow	hematopoietic oligopotent progenitor cell	27785	0.0284	female	XIST	2.06351	0.274706	15375	55.3356
breast	myeloid cell	49105	0.0116	female	XIST	2.14477	0.307725	27166	55.3223
breast	capillary endothelial cell	32457	0.0077	female	XIST	2.11942	0.297423	17952	55.3101
bone marrow	CD14-positive, CD16-positive monocyte	1679	0.0017	female	XIST	2.00411	0.250567	928	55.271
hindlimb	epithelial cell	1041	0.0067	female	XIST	1.90852	0.211722	575	55.2354
musculature	mast cell	440	0.0007	female	XIST	2.45249	0.432771	243	55.2273
nose	follicular dendritic cell	29	0.0001	female	XIST	2.10356	0.29098	16	55.1724
bone marrow	common myeloid progenitor	6112	0.0062	female	XIST	2.01212	0.253825	3372	55.1702
uterus	leukocyte	3359	0.0166	female	XIST	2.02834	0.260415	1851	55.1057
musculature	CD14-positive, CD16-low monocyte	503	0.0007	female	XIST	2.17825	0.32133	277	55.0696
colon	enteric smooth muscle cell	1293	0.0016	female	XIST	1.91695	0.21515	712	55.0657
hindlimb	basal cell	149	0.001	female	XIST	1.97534	0.238877	82	55.0336
bladder organ	dendritic cell	20	0.0004	female	XIST	1.92457	0.218247	11	55
lamina propria	mast cell	1476	0.0344	female	XIST	1.9485	0.227971	811	54.9458
heart	myeloid leukocyte	13109	0.004	female	XIST	2.40596	0.413862	7196	54.8936
breast	myeloid dendritic cell	443	0.0001	female	XIST	1.94479	0.226463	243	54.8533
colon	contractile cell	4430	0.0055	female	XIST	2.03973	0.265044	2430	54.8533
heart	professional antigen presenting cell	10142	0.0031	female	XIST	2.45245	0.432757	5560	54.8215
hindlimb	squamous epithelial cell	996	0.0064	female	XIST	1.90486	0.210235	546	54.8193
esophagus	connective tissue cell	4001	0.0148	female	XIST	2.74117	0.550078	2193	54.8113
kidney	epithelial cell of nephron	269161	0.1298	female	XIST	2.35246	0.392123	147451	54.7817
musculature	cell	104512	0.1545	female	XIST	2.2652	0.356666	57249	54.7774
vasculature	macrophage	10070	0.0212	female	XIST	1.92094	0.216772	5515	54.7666
lung	basal cell	6319	0.0011	female	XIST	2.16192	0.314694	3457	54.708
lung	mesothelial fibroblast	64	0	female	XIST	2.34236	0.388019	35	54.6875
intestine	glial cell	410	0.0056	female	XIST	2.73687	0.548333	224	54.6341
spinal cord	capillary endothelial cell	346	0.0042	female	XIST	2.33128	0.383519	189	54.6243
bladder organ	leukocyte	10384	0.2137	female	XIST	2.03941	0.264912	5672	54.6225
heart	CD8-positive, alpha-beta cytotoxic T cell	520	0.0002	female	XIST	2.37146	0.399844	284	54.6154
breast	myeloid leukocyte	39854	0.0093	female	XIST	2.07186	0.278099	21756	54.5893
milk	dendritic cell	425	0.0049	female	XIST	1.99328	0.246168	232	54.5882
exocrine gland	macrophage	1101	0.006	female	XIST	2.26858	0.358037	601	54.5867
bone marrow	conventional dendritic cell	2220	0.0022	female	XIST	1.97996	0.240756	1211	54.5495
spleen	CD16-positive, CD56-dim natural killer cell, human	2253	0.0038	female	XIST	2.17608	0.320449	1229	54.5495
intestine	intestinal epithelial cell	10367	0.1414	female	XIST	2.54374	0.469851	5653	54.5288
bladder organ	vein endothelial cell	266	0.0055	female	XIST	1.98123	0.241269	145	54.5113
lung	lung microvascular endothelial cell	3463	0.0006	female	XIST	2.2131	0.335491	1887	54.4903
breast	regulatory T cell	2351	0.0005	female	XIST	2.04853	0.26862	1280	54.4449
vasculature	professional antigen presenting cell	10163	0.0212	female	XIST	1.92028	0.216501	5533	54.4426
breast	gamma-delta T cell	529	0.0001	female	XIST	2.03874	0.264642	288	54.4423
liver	Kupffer cell	9187	0.0043	female	XIST	2.37266	0.400333	5001	54.4356
brain	hippocampal interneuron	2300	0.0001	female	XIST	2.44867	0.431221	1252	54.4348
liver	tissue-resident macrophage	9190	0.0043	female	XIST	2.37266	0.400333	5001	54.4178
breast	mononuclear phagocyte	42639	0.0099	female	XIST	2.04946	0.268997	23201	54.4126
intestine	endo-epithelial cell	10412	0.1415	female	XIST	2.54322	0.469641	5657	54.3315
adrenal gland	sympathetic neuron	324	0.0013	female	XIST	2.90472	0.616539	176	54.321
heart	progenitor cell	3603	0.0011	female	XIST	2.21359	0.33569	1957	54.3158
lung	respiratory epithelial cell	31808	0.0054	female	XIST	2.56137	0.477015	17264	54.2757
lung	endo-epithelial cell	31811	0.0054	female	XIST	2.5613	0.47699	17265	54.2737
ureter	cell	15149	0.2316	female	XIST	1.96821	0.235978	8220	54.261
esophagogastric junction	P/D1 enteroendocrine cell	59	0.0027	female	XIST	1.86905	0.195683	32	54.2373
brain	unipolar brush cell	277	0	female	XIST	2.35097	0.391519	150	54.1516
exocrine gland	mature NK T cell	416	0.0023	female	XIST	2.17871	0.321517	225	54.0865
bladder organ	endothelial cell of vascular tree	405	0.0083	female	XIST	1.95293	0.229772	219	54.0741
mucosa	cell	67602	0.3462	female	XIST	2.36901	0.398851	36554	54.0724
mucosa	neuron associated cell	74	0.0004	female	XIST	2.74205	0.550438	40	54.0541
lamina propria	myeloid leukocyte	1914	0.0439	female	XIST	2.00807	0.252176	1034	54.023
small intestine	neuron	3664	0.0025	female	XIST	2.16569	0.316229	1979	54.012
heart	macrophage	9302	0.0028	female	XIST	2.42505	0.421622	5019	53.9561
esophagus	endothelial cell of lymphatic vessel	165	0.0006	female	XIST	2.57537	0.482706	89	53.9394
lung	goblet cell	2140	0.0004	female	XIST	2.22172	0.338998	1154	53.9252
endocrine gland	B cell	4771	0.0068	female	XIST	2.13278	0.302855	2571	53.8881
kidney	kidney cell	306726	0.1455	female	XIST	2.35041	0.391292	165282	53.8859
colon	smooth muscle cell	1329	0.0016	female	XIST	1.92073	0.216685	716	53.8751
hindlimb	natural killer cell	26	0.0002	female	XIST	1.78125	0.160008	14	53.8462
uterus	cell	111833	0.5381	female	XIST	2.00837	0.252299	60181	53.8133
adrenal gland	cortical cell of adrenal gland	50493	0.1952	female	XIST	2.70876	0.536912	27163	53.7956
musculature	type I muscle cell	17046	0.0247	female	XIST	2.22055	0.33852	9164	53.7604
vasculature	mononuclear phagocyte	10398	0.0214	female	XIST	1.92051	0.216596	5585	53.7123
lymph node	effector CD4-positive, alpha-beta T cell	1566	0.0021	female	XIST	1.97185	0.23746	841	53.7037
uterus	hematopoietic cell	4120	0.0198	female	XIST	2.01346	0.254366	2212	53.6893
eye	endothelial cell	6705	0.001	female	XIST	2.3941	0.409045	3597	53.6465
lung	endothelial cell	64618	0.0108	female	XIST	2.276	0.361053	34661	53.6399
vasculature	myeloid leukocyte	10609	0.0218	female	XIST	1.92266	0.217472	5690	53.6337
vasculature	myeloid cell	10612	0.0218	female	XIST	1.92266	0.217472	5690	53.6185
lung	basophil	687	0.0001	female	XIST	2.02156	0.25766	368	53.5662
exocrine gland	duct epithelial cell	7818	0.0419	female	XIST	2.07296	0.278544	4186	53.5431
lung	pulmonary ionocyte	43	0	female	XIST	2.0786	0.280837	23	53.4884
musculature	tendon cell	518	0.0007	female	XIST	2.19087	0.32646	277	53.4749
ureter	lymphocyte of B lineage	260	0.0039	female	XIST	1.91821	0.215662	139	53.4615
adrenal gland	secretory cell	55336	0.2123	female	XIST	2.70941	0.537174	29554	53.4083
lamina propria	macrophage	382	0.0087	female	XIST	2.2416	0.347075	204	53.4031
musculature	slow muscle cell	17315	0.025	female	XIST	2.22189	0.339066	9244	53.3872
heart	mononuclear phagocyte	11676	0.0035	female	XIST	2.36858	0.398673	6233	53.383
breast	conventional dendritic cell	4412	0.001	female	XIST	1.93968	0.224386	2352	53.3092
ureter	B cell	259	0.0039	female	XIST	1.91603	0.214777	138	53.2819
axilla	mature NK T cell	107	0.0007	female	XIST	2.02543	0.25923	57	53.271
kidney	kidney epithelial cell	283238	0.1328	female	XIST	2.3496	0.390961	150835	53.2538
kidney	epithelial cell	317625	0.1487	female	XIST	2.35074	0.391425	168852	53.1608
spleen	type I NK T cell	448	0.0007	female	XIST	2.09417	0.287163	238	53.125
mucosa	endothelial cell of artery	1952	0.0098	female	XIST	2.12955	0.301544	1036	53.0738
musculature	CD16-positive, CD56-dim natural killer cell, human	2427	0.0035	female	XIST	2.08688	0.284201	1288	53.0696
endocrine gland	lymphocyte of B lineage	4994	0.007	female	XIST	2.13131	0.302258	2649	53.0437
lung	secondary crest myofibroblast	313	0.0001	female	XIST	2.28071	0.362969	166	53.0351
lung	epithelial cell of alveolus of lung	124348	0.0205	female	XIST	2.19438	0.327885	65937	53.0262
fallopian tube	natural killer cell	4425	0.0107	female	XIST	2.11809	0.296886	2346	53.0169
ureter	lymphocyte	3038	0.0454	female	XIST	1.99644	0.247452	1610	52.9954
ureter	mononuclear cell	3040	0.0454	female	XIST	1.99644	0.247452	1610	52.9605
ureter	T cell	2778	0.0414	female	XIST	2.00384	0.250456	1471	52.9518
musculature	CD14-positive monocyte	682	0.001	female	XIST	2.15872	0.313395	361	52.9326
brain	pyramidal neuron	14733	0.0005	female	XIST	2.2141	0.335897	7795	52.9084
breast	dendritic cell	4730	0.0011	female	XIST	1.94278	0.225644	2502	52.8964
kidney	endothelial cell	31458	0.0146	female	XIST	2.34122	0.387554	16639	52.8927
mucosa	mononuclear phagocyte	3272	0.0164	female	XIST	2.42983	0.423562	1729	52.8423
mucosa	professional antigen presenting cell	3272	0.0164	female	XIST	2.42983	0.423562	1729	52.8423
musculature	monocyte	689	0.001	female	XIST	2.15779	0.313019	364	52.8302
pancreas	endothelial cell of lymphatic vessel	53	0.0002	female	XIST	2.42565	0.421865	28	52.8302
ureter	mature T cell	1791	0.0266	female	XIST	2.02724	0.259965	946	52.8197
spleen	CD16-negative, CD56-bright natural killer cell, human	2660	0.0044	female	XIST	2.011	0.253368	1405	52.8195
liver	plasmacytoid dendritic cell	1578	0.0007	female	XIST	1.98683	0.243547	833	52.7883
lung	alveolar type 1 fibroblast cell	2517	0.0004	female	XIST	2.32057	0.379163	1328	52.7612
lung	stromal cell	6547	0.0011	female	XIST	2.55072	0.472687	3454	52.757
brain	malignant cell	111817	0.004	female	XIST	2.34165	0.38773	58951	52.721
esophagus	gamma-delta T cell	74	0.0003	female	XIST	2.19079	0.326428	39	52.7027
fallopian tube	endothelial cell	18416	0.0443	female	XIST	2.18896	0.325683	9698	52.6607
stomach	professional antigen presenting cell	773	0.0047	female	XIST	2.1247	0.299571	407	52.652
intestine	mesothelial cell	76	0.001	female	XIST	2.37837	0.402654	40	52.6316
hindlimb	fibroblast of dermis	3180	0.0196	female	XIST	1.91011	0.212368	1673	52.6101
bone marrow	bone marrow cell	14022	0.0136	female	XIST	2.03253	0.262118	7374	52.5888
kidney	blood vessel endothelial cell	1198	0.0006	female	XIST	2.36798	0.39843	630	52.5876
kidney	squamous epithelial cell	1202	0.0006	female	XIST	2.36615	0.397688	632	52.579
exocrine gland	inflammatory macrophage	312	0.0016	female	XIST	2.15901	0.313514	164	52.5641
hindlimb	Schwann cell precursor	59	0.0004	female	XIST	1.98908	0.24446	31	52.5424
lung	glandular epithelial cell	2341	0.0004	female	XIST	2.19754	0.329169	1230	52.5416
kidney	kidney capillary endothelial cell	1125	0.0005	female	XIST	2.36688	0.397984	591	52.5333
brain	mast cell	461	0	female	XIST	2.4006	0.411684	242	52.4946
lung	mucus secreting cell	2770	0.0005	female	XIST	2.14594	0.3082	1454	52.491
adipose tissue	neuron associated cell	1728	0.0036	female	XIST	2.36284	0.396341	907	52.4884
kidney	kidney cortex tubule cell	194291	0.0897	female	XIST	2.39174	0.408086	101943	52.4692
endocrine gland	keratinocyte	143	0.0002	female	XIST	1.72882	0.138701	75	52.4476
brain	monocyte	13269	0.0005	female	XIST	2.15313	0.311122	6950	52.3777
musculature	natural killer cell	2601	0.0037	female	XIST	2.07944	0.28118	1362	52.3645
bone marrow	granulocyte monocyte progenitor cell	13919	0.0135	female	XIST	2.02956	0.26091	7287	52.3529
exocrine gland	lymphocyte of B lineage	8010	0.042	female	XIST	2.07658	0.280016	4191	52.3221
hindlimb	pericyte	610	0.0037	female	XIST	1.94167	0.225193	319	52.2951
intestine	endothelial cell	356	0.0047	female	XIST	2.67946	0.525004	186	52.2472
exocrine gland	endothelial cell	4417	0.0231	female	XIST	2.35059	0.391364	2307	52.23
breast	effector memory CD4-positive, alpha-beta T cell	4816	0.0011	female	XIST	2.10897	0.293179	2514	52.201
stomach	CD4-positive helper T cell	205	0.0012	female	XIST	2.11136	0.294148	107	52.1951
heart	CD8-positive, alpha-beta T cell	1206	0.0004	female	XIST	2.49321	0.44932	629	52.1559
lung	epithelial cell of lung	138615	0.0225	female	XIST	2.18231	0.32298	72273	52.1394
exocrine gland	fibroblast	10300	0.0537	female	XIST	2.2421	0.347279	5365	52.0874
uterus	endothelial cell	11924	0.0555	female	XIST	2.06517	0.27538	6206	52.0463
hindlimb	articular chondrocyte	125	0.0008	female	XIST	1.9872	0.243696	65	52
eye	pericyte	481	0.0001	female	XIST	2.52307	0.461453	250	51.9751
liver	basophil	189	0.0001	female	XIST	2.0604	0.27344	98	51.8519
lung	blood vessel endothelial cell	42135	0.0068	female	XIST	2.27191	0.359391	21843	51.8405
exocrine gland	naive B cell	1119	0.0058	female	XIST	2.02007	0.257054	580	51.832
ureter	urothelial cell	7403	0.1081	female	XIST	1.9182	0.215659	3836	51.8168
uterus	fibroblast	3953	0.0183	female	XIST	2.16747	0.316949	2048	51.8088
musculature	cell of skeletal muscle	49767	0.0695	female	XIST	2.33542	0.385199	25746	51.7331
mucosa	B cell	808	0.004	female	XIST	2.23451	0.344193	418	51.7327
hindlimb	Schwann cell	610	0.0037	female	XIST	1.87972	0.20002	315	51.6393
eye	pigmented epithelial cell	12572	0.0018	female	XIST	2.41339	0.416885	6491	51.6306
lung	lung interstitial macrophage	525	0.0001	female	XIST	2.01453	0.254804	271	51.619
small intestine	intestinal tuft cell	62	0	female	XIST	2.14931	0.30957	32	51.6129
fallopian tube	connective tissue cell	92629	0.2179	female	XIST	2.05355	0.27066	47723	51.5206
exocrine gland	connective tissue cell	10952	0.0564	female	XIST	2.23279	0.343496	5635	51.4518
intestine	neural cell	1286	0.0165	female	XIST	2.6351	0.506977	661	51.3997
eye	corneal epithelial cell	13959	0.0019	female	XIST	2.46742	0.438839	7168	51.3504
heart	CD14-positive monocyte	1711	0.0005	female	XIST	2.02063	0.257281	878	51.315
mucosa	lymphocyte of B lineage	2366	0.0115	female	XIST	2.13542	0.303928	1214	51.3102
breast	monocyte	7440	0.0016	female	XIST	2.00575	0.251235	3812	51.2366
eye	epithelial cell	42492	0.0059	female	XIST	2.39474	0.409303	21767	51.2261
mucosa	plasma cell	1558	0.0075	female	XIST	2.08339	0.282783	796	51.0911
endocrine gland	plasmacytoid dendritic cell	734	0.001	female	XIST	1.94172	0.225213	375	51.0899
bone marrow	central memory CD8-positive, alpha-beta T cell	1429	0.0014	female	XIST	2.17206	0.318817	730	51.0847
kidney	mesenchymal stem cell	3412	0.0015	female	XIST	1.94716	0.227427	1743	51.0844
musculature	vein endothelial cell	787	0.0011	female	XIST	2.30333	0.372157	402	51.0801
small intestine	paneth cell of epithelium of small intestine	470	0.0003	female	XIST	2.01364	0.25444	240	51.0638
brain	capillary endothelial cell	147	0	female	XIST	2.58561	0.486866	75	51.0204
lung	squamous epithelial cell	43575	0.0069	female	XIST	2.26514	0.356639	22204	50.9558
lung	endothelial cell of vascular tree	50141	0.0079	female	XIST	2.28237	0.363643	25542	50.9403
hindlimb	mesenchymal cell	3848	0.0229	female	XIST	1.90708	0.211139	1960	50.9356
brain	hippocampal neuron	18549	0.0006	female	XIST	2.5622	0.477354	9448	50.9354
liver	vein endothelial cell	882	0.0004	female	XIST	2.18469	0.323948	449	50.907
lung	airway submucosal gland collecting duct epithelial cell	222	0	female	XIST	1.77011	0.15548	113	50.9009
bone marrow	dendritic cell	10179	0.0096	female	XIST	2.05729	0.272179	5181	50.8989
musculature	mural cell	2284	0.0031	female	XIST	2.24619	0.34894	1162	50.8757
heart	mature alpha-beta T cell	2440	0.0007	female	XIST	2.42935	0.423369	1239	50.7787
eye	squamous epithelial cell	14583	0.002	female	XIST	2.46543	0.438031	7400	50.744
liver	malignant cell	180328	0.0794	female	XIST	2.30087	0.371159	91404	50.6876
lung	pneumocyte	113182	0.0178	female	XIST	2.12529	0.299811	57360	50.6794
brain	erythroid lineage cell	85	0	female	XIST	2.12495	0.299674	43	50.5882
mucosa	contractile cell	4830	0.0231	female	XIST	2.4105	0.415709	2443	50.5797
axilla	cell	78655	0.4702	female	XIST	2.34042	0.387232	39779	50.574
tongue	contractile cell	89	0.003	female	XIST	2.10752	0.29259	45	50.5618
liver	inflammatory macrophage	987	0.0004	female	XIST	2.4877	0.44708	499	50.5572
endocrine gland	epithelial cell	13322	0.0178	female	XIST	2.04851	0.268612	6734	50.548
uterus	pericyte	95	0.0004	female	XIST	1.89976	0.208164	48	50.5263
breast	endothelial cell of lymphatic vessel	29358	0.0063	female	XIST	2.26257	0.355596	14819	50.4769
lung	stem cell	7715	0.0012	female	XIST	2.2193	0.338013	3894	50.4731
musculature	skeletal muscle fiber	36355	0.0495	female	XIST	2.33615	0.385498	18346	50.4635
hindlimb	osteoblast	222	0.0013	female	XIST	1.91994	0.216366	112	50.4505
heart	activated CD4-positive, alpha-beta T cell	270	0.0001	female	XIST	2.05635	0.271794	136	50.3704
lung	epithelial cell	272463	0.0426	female	XIST	2.23997	0.346413	137193	50.3529
uterus	perivascular cell	485	0.0022	female	XIST	1.93637	0.223041	244	50.3093
heart	activated CD8-positive, alpha-beta T cell	686	0.0002	female	XIST	2.59344	0.490048	345	50.2915
intestine	epithelial cell	12048	0.1516	female	XIST	2.54051	0.46854	6059	50.2905
bladder organ	T cell	3109	0.0589	female	XIST	2.04806	0.268428	1563	50.2734
uterus	myeloid cell	1160	0.0052	female	XIST	1.95406	0.230231	583	50.2586
uterus	vascular associated smooth muscle cell	390	0.0018	female	XIST	1.94534	0.226685	196	50.2564
hindlimb	supporting cell	977	0.0057	female	XIST	1.93059	0.220694	491	50.2559
breast	pericyte	30093	0.0064	female	XIST	2.12447	0.299476	15112	50.2177
bone marrow	megakaryocyte-erythroid progenitor cell	2562	0.0024	female	XIST	2.03736	0.264078	1286	50.1952
ureter	cytotoxic T cell	1339	0.0189	female	XIST	2.02219	0.257914	672	50.1867
musculature	stromal cell	917	0.0012	female	XIST	2.42702	0.422423	460	50.1636
breast	memory T cell	35505	0.0076	female	XIST	2.06842	0.276702	17800	50.1338
brain	neuron associated cell (sensu Vertebrata)	13857	0.0005	female	XIST	2.46029	0.435942	6942	50.0974
esophagus	neuron	12	0	female	XIST	2.84642	0.592847	6	50
exocrine gland	adventitial cell	324	0.0016	female	XIST	1.99139	0.245398	162	50
heart	dermis microvascular lymphatic vessel endothelial cell	128	0	female	XIST	2.71653	0.540065	64	50
heart	monocyte	2120	0.0006	female	XIST	2.07698	0.28018	1060	50
kidney	kidney resident macrophage	14	0	female	XIST	2.4537	0.433265	7	50
lymph node	bronchus fibroblast of lung	26	0	female	XIST	2.03932	0.264875	13	50
small intestine	type D enteroendocrine cell	10	0	female	XIST	1.52063	0.0541008	5	50
small intestine	duodenum glandular cell	44	0	female	XIST	1.95116	0.229052	22	50
stomach	endothelial cell of lymphatic vessel	16	0.0001	female	XIST	2.53822	0.467607	8	50
tongue	pericyte	82	0.0028	female	XIST	2.1204	0.297825	41	50
musculature	muscle cell	39039	0.0527	female	XIST	2.32854	0.382404	19519	49.9987
fallopian tube	macrophage	14658	0.0334	female	XIST	2.08809	0.284695	7324	49.9659
musculature	contractile cell	41015	0.0553	female	XIST	2.32199	0.37974	20480	49.933
breast	mural cell	32350	0.0069	female	XIST	2.11637	0.296188	16146	49.9104
mucosa	fibroblast	13192	0.0624	female	XIST	2.17422	0.319693	6583	49.9015
intestine	neuron	876	0.0109	female	XIST	2.58293	0.485779	437	49.8858
exocrine gland	myoepithelial cell	2120	0.0106	female	XIST	2.16925	0.317676	1057	49.8585
esophagus	vein endothelial cell	528	0.0018	female	XIST	2.11169	0.294284	263	49.8106
breast	CD8-positive, alpha-beta memory T cell	30689	0.0065	female	XIST	2.06175	0.273992	15286	49.8094
brain	smooth muscle cell	1464	0	female	XIST	2.39364	0.408857	729	49.7951
neck	macrophage	414	0.0163	female	XIST	1.97605	0.239164	206	49.7585
fallopian tube	peg cell	8769	0.0199	female	XIST	2.14982	0.309778	4360	49.7206
ureter	epithelial cell	8049	0.1127	female	XIST	1.92897	0.220035	4001	49.708
adrenal gland	neuron	5162	0.0184	female	XIST	2.73036	0.545686	2565	49.69
bone marrow	central memory CD4-positive, alpha-beta T cell	6594	0.0061	female	XIST	2.16024	0.314013	3276	49.6815
small intestine	epithelial cell of small intestine	550	0.0003	female	XIST	2.00311	0.25016	273	49.6364
lung	mesenchymal cell	23587	0.0036	female	XIST	1.93275	0.221569	11706	49.629
lung	lung secretory cell	97612	0.015	female	XIST	2.11488	0.295582	48440	49.625
lung	respiratory goblet cell	1598	0.0002	female	XIST	2.19814	0.329413	793	49.6245
heart	CD4-positive, alpha-beta T cell	766	0.0002	female	XIST	2.31588	0.37726	380	49.6084
fallopian tube	professional antigen presenting cell	14801	0.0335	female	XIST	2.08862	0.284908	7341	49.598
fallopian tube	mononuclear phagocyte	14803	0.0335	female	XIST	2.08862	0.284908	7341	49.5913
adrenal gland	chromaffin cell	4825	0.0172	female	XIST	2.71751	0.540466	2389	49.513
bladder organ	lymphocyte	4492	0.0837	female	XIST	2.01195	0.253754	2221	49.4435
adrenal gland	neural cell	5242	0.0186	female	XIST	2.73098	0.54594	2589	49.3895
brain	glioblast	241	0	female	XIST	2.33586	0.385377	119	49.3776
lung	capillary endothelial cell	13875	0.0021	female	XIST	2.30488	0.372788	6841	49.3045
exocrine gland	vascular associated smooth muscle cell	69	0.0003	female	XIST	1.86713	0.194904	34	49.2754
intestine	innate lymphoid cell	410	0.0051	female	XIST	2.63858	0.508393	202	49.2683
exocrine gland	fibroblast of breast	2479	0.0122	female	XIST	2.07122	0.277837	1221	49.2537
lung	microvascular endothelial cell	14360	0.0022	female	XIST	2.29663	0.369437	7072	49.2479
adrenal gland	erythroblast	63	0.0002	female	XIST	2.79236	0.570881	31	49.2063
heart	CD4-positive, alpha-beta cytotoxic T cell	496	0.0001	female	XIST	2.46054	0.436044	244	49.1935
lung	type II pneumocyte	92032	0.0141	female	XIST	2.10912	0.293238	45267	49.1862
spinal cord	blood vessel endothelial cell	484	0.0053	female	XIST	2.35524	0.393251	238	49.1736
brain	endothelial cell of vascular tree	5655	0.0002	female	XIST	2.44322	0.429005	2780	49.16
heart	mature NK T cell	468	0.0001	female	XIST	2.44217	0.428579	230	49.1453
exocrine gland	CD4-positive helper T cell	1217	0.006	female	XIST	2.00169	0.249585	598	49.1372
bladder organ	cell	22151	0.4098	female	XIST	1.99522	0.246955	10877	49.1039
breast	professional antigen presenting cell	48423	0.0101	female	XIST	2.04138	0.265712	23731	49.0077
lung	secretory cell	127979	0.0194	female	XIST	2.12279	0.298794	62613	48.9244
placenta	group 3 innate lymphoid cell, human	1901	0.0019	female	XIST	2.38813	0.406617	930	48.9216
lung	vein endothelial cell of respiratory system	916	0.0001	female	XIST	1.90338	0.209636	448	48.9083
lymph node	effector CD8-positive, alpha-beta T cell	790	0.001	female	XIST	1.99878	0.248403	386	48.8608
esophagus	endothelial cell of vascular tree	2031	0.0067	female	XIST	2.41668	0.41822	992	48.8429
lung	myofibroblast cell	2237	0.0003	female	XIST	2.23433	0.344118	1092	48.8154
lung	peripheral nervous system neuron	80	0	female	XIST	1.89832	0.207578	39	48.75
musculature	mononuclear cell	14870	0.0196	female	XIST	2.17508	0.320043	7246	48.729
small intestine	endothelial cell	8988	0.0054	female	XIST	2.12869	0.301192	4379	48.7205
small intestine	blood vessel endothelial cell	3878	0.0023	female	XIST	2.13596	0.304145	1887	48.6591
esophagus	natural killer cell	72	0.0002	female	XIST	2.11168	0.294279	35	48.6111
musculature	leukocyte	15615	0.0205	female	XIST	2.18638	0.324635	7581	48.5495
musculature	hematopoietic cell	15627	0.0205	female	XIST	2.18651	0.324689	7585	48.5378
bone marrow	CD4-positive, CD25-positive, alpha-beta regulatory T cell	763	0.0007	female	XIST	2.0641	0.274944	370	48.4928
bone marrow	small pre-B-II cell	976	0.0009	female	XIST	2.23877	0.345923	473	48.4631
fallopian tube	myeloid leukocyte	18493	0.0409	female	XIST	2.07313	0.278614	8956	48.4291
breast	natural killer cell	5968	0.0012	female	XIST	2.09882	0.289052	2890	48.4249
mucosa	connective tissue cell	15097	0.0692	female	XIST	2.17112	0.318433	7310	48.4202
fallopian tube	perivascular cell	13539	0.0299	female	XIST	1.96506	0.234699	6549	48.3714
breast	innate lymphoid cell	6017	0.0012	female	XIST	2.09856	0.28895	2908	48.3297
fallopian tube	pericyte	11681	0.0258	female	XIST	1.9681	0.235933	5644	48.3178
lung	T follicular helper cell	29	0	female	XIST	2.25047	0.350677	14	48.2759
neck	mononuclear phagocyte	429	0.0164	female	XIST	1.97398	0.238325	207	48.2517
neck	myeloid leukocyte	429	0.0164	female	XIST	1.97398	0.238325	207	48.2517
musculature	pericyte	1854	0.0024	female	XIST	2.15569	0.312163	894	48.2201
hindlimb	chondroblast	502	0.0028	female	XIST	1.9496	0.228418	242	48.2072
brain	hippocampal astrocyte	8001	0.0003	female	XIST	2.73174	0.546248	3854	48.169
lamina propria	mononuclear phagocyte	517	0.0106	female	XIST	2.19982	0.330098	249	48.1625
endocrine gland	immature B cell	54	0.0001	female	XIST	1.8913	0.204728	26	48.1481
lamina propria	professional antigen presenting cell	505	0.0103	female	XIST	2.20573	0.332496	243	48.1188
lung	alveolar capillary type 2 endothelial cell	499	0.0001	female	XIST	2.09051	0.285676	240	48.0962
kidney	kidney loop of Henle thin ascending limb epithelial cell	5377	0.0023	female	XIST	2.17717	0.320894	2585	48.0751
skin of body	inflammatory macrophage	1515	0.001	female	XIST	2.28856	0.366157	728	48.0528
endocrine gland	professional antigen presenting cell	7888	0.01	female	XIST	2.07011	0.277387	3789	48.035
endocrine gland	mast cell	98	0.0001	female	XIST	1.99222	0.245738	47	47.9592
uterus	mononuclear cell	1022	0.0044	female	XIST	1.96988	0.236659	490	47.9452
kidney	kidney pelvis urothelial cell	48	0	female	XIST	1.68737	0.121856	23	47.9167
uterus	supporting cell	8038	0.0344	female	XIST	1.96802	0.235903	3850	47.8975
placenta	plasma cell	236	0.0002	female	XIST	2.07864	0.280854	113	47.8814
mucosa	dendritic cell	1640	0.0074	female	XIST	2.25685	0.353272	785	47.8659
breast	mature NK T cell	3965	0.0008	female	XIST	2.06553	0.275525	1897	47.8436
exocrine gland	dendritic cell	347	0.0017	female	XIST	2.2134	0.335614	166	47.8386
esophagogastric junction	gamma-delta T cell	23	0.0009	female	XIST	2.13621	0.304247	11	47.8261
exocrine gland	mononuclear phagocyte	1789	0.0086	female	XIST	2.26165	0.355221	855	47.7921
exocrine gland	mononuclear cell	18240	0.0873	female	XIST	2.17413	0.319657	8716	47.7851
exocrine gland	lymphocyte	16451	0.0787	female	XIST	2.16461	0.315789	7861	47.7843
bone marrow	natural killer cell	10504	0.0093	female	XIST	2.09329	0.286806	5018	47.7723
adrenal gland	epithelial cell	66348	0.2277	female	XIST	2.66917	0.520823	31692	47.7663
breast	CD4-positive helper T cell	26170	0.0053	female	XIST	2.01052	0.253174	12500	47.7646
mucosa	mononuclear cell	12872	0.0582	female	XIST	2.3395	0.386858	6140	47.7004
heart	smooth muscle cell	17394	0.0046	female	XIST	2.32621	0.381458	8290	47.6601
bone marrow	innate lymphoid cell	10566	0.0093	female	XIST	2.09314	0.286748	5034	47.6434
bone marrow	large pre-B-II cell	2566	0.0023	female	XIST	1.89503	0.206243	1222	47.6228
lymph node	capillary endothelial cell	21	0	female	XIST	2.58325	0.485908	10	47.619
hindlimb	smooth muscle cell	664	0.0037	female	XIST	1.88272	0.20124	316	47.5904
ovary	endothelial cell	2507	0.0189	female	XIST	2.19061	0.326352	1193	47.5868
bladder organ	lymphocyte of B lineage	1383	0.0248	female	XIST	1.92617	0.218897	658	47.5777
exocrine gland	hematopoietic cell	18428	0.0877	female	XIST	2.17485	0.319949	8759	47.5309
placenta	granulocyte	282	0.0003	female	XIST	2.12426	0.299393	134	47.5177
liver	T cell	87595	0.0361	female	XIST	2.16687	0.316708	41615	47.5084
exocrine gland	leukocyte	18363	0.0873	female	XIST	2.17414	0.319663	8722	47.4977
lung	endothelial cell of artery	5630	0.0008	female	XIST	2.19486	0.328082	2673	47.4778
eye	contractile cell	13028	0.0017	female	XIST	2.51149	0.456748	6182	47.4516
kidney	non-classical monocyte	782	0.0003	female	XIST	2.12251	0.29868	371	47.4425
heart	T cell	2716	0.0007	female	XIST	2.44134	0.42824	1288	47.4227
musculature	extrafusal muscle fiber	30344	0.0388	female	XIST	2.238	0.345613	14387	47.413
eye	keratocyte	154	0	female	XIST	2.11435	0.295363	73	47.4026
stomach	CD4-positive, alpha-beta T cell	1045	0.0058	female	XIST	2.10279	0.290667	495	47.3684
colon	myofibroblast cell	1328	0.0014	female	XIST	2.10098	0.289934	629	47.3645
bone marrow	hematopoietic precursor cell	80216	0.0703	female	XIST	2.04646	0.267777	37987	47.3559
musculature	endothelial cell of arteriole	224	0.0003	female	XIST	2.26455	0.3564	106	47.3214
kidney	mast cell	406	0.0002	female	XIST	2.28306	0.363922	192	47.2906
eye	smooth muscle cell	12547	0.0016	female	XIST	2.511	0.45655	5932	47.2782
blood	type I NK T cell	800	0	female	XIST	2.07245	0.278339	378	47.25
hindlimb	fibroblast	9629	0.0531	female	XIST	1.86826	0.195365	4546	47.2115
colon	endothelial cell	2662	0.0028	female	XIST	2.18765	0.325152	1256	47.1826
exocrine gland	luminal epithelial cell of mammary gland	5373	0.0254	female	XIST	1.88651	0.202778	2534	47.1617
hindlimb	connective tissue cell	12375	0.0681	female	XIST	1.87714	0.198972	5830	47.1111
stomach	natural killer cell	51	0.0003	female	XIST	1.94365	0.226001	24	47.0588
eye	ciliary muscle cell	12235	0.0016	female	XIST	2.51307	0.457388	5756	47.0454
small intestine	vein endothelial cell	770	0.0004	female	XIST	2.11726	0.296548	362	47.013
musculature	CD14-low, CD16-positive monocyte	179	0.0002	female	XIST	2.09433	0.287229	84	46.9274
breast	luminal hormone-sensing cell of mammary gland	201197	0.0403	female	XIST	1.93292	0.221637	94392	46.9152
bladder organ	endothelial cell	567	0.01	female	XIST	2.04425	0.266878	266	46.9136
breast	class switched memory B cell	4349	0.0009	female	XIST	1.99813	0.248136	2039	46.8843
hindlimb	tendon cell	367	0.002	female	XIST	1.91006	0.212348	172	46.8665
bladder organ	connective tissue cell	7660	0.1352	female	XIST	1.89995	0.20824	3589	46.8538
endocrine gland	endo-epithelial cell	10519	0.013	female	XIST	1.98746	0.2438	4927	46.8391
hindlimb	lymphocyte	47	0.0003	female	XIST	1.74472	0.145161	22	46.8085
lung	connective tissue cell	69009	0.01	female	XIST	2.32453	0.380776	32291	46.7924
tongue	cell	9408	0.2969	female	XIST	2.15951	0.313718	4402	46.79
exocrine gland	precursor cell	994	0.0047	female	XIST	2.15433	0.311611	465	46.7807
small intestine	endothelial cell of vascular tree	5334	0.0031	female	XIST	2.10481	0.291488	2494	46.7567
uterus	epithelial cell	43522	0.1819	female	XIST	1.94498	0.22654	20339	46.7327
colon	connective tissue cell	22488	0.0238	female	XIST	2.1245	0.299491	10503	46.7049
adrenal gland	columnar/cuboidal epithelial cell	5121	0.0172	female	XIST	2.71661	0.540099	2391	46.6901
lung	chondrocyte	3088	0.0004	female	XIST	2.13959	0.305621	1440	46.6321
blood	megakaryocyte-erythroid progenitor cell	723	0	female	XIST	2.218	0.337482	337	46.6113
liver	macrophage	71376	0.0289	female	XIST	2.20995	0.334213	33251	46.5857
lung	fibroblast	48150	0.007	female	XIST	2.30605	0.373266	22415	46.5524
kidney	kidney loop of Henle cortical thick ascending limb epithelial cell	460	0.0002	female	XIST	1.90294	0.209457	214	46.5217
bone marrow	naive thymus-derived CD8-positive, alpha-beta T cell	5766	0.005	female	XIST	2.18476	0.323978	2682	46.514
esophagus	capillary endothelial cell	43	0.0001	female	XIST	2.65024	0.513129	20	46.5116
brain	smooth muscle cell of the brain vasculature	228	0	female	XIST	2.26316	0.355835	106	46.4912
bone marrow	erythroid progenitor cell	11470	0.0099	female	XIST	1.92965	0.220309	5329	46.4603
exocrine gland	endothelial cell of artery	168	0.0008	female	XIST	2.04662	0.267841	78	46.4286
lung	respiratory basal cell	2548	0.0004	female	XIST	2.14475	0.30772	1183	46.4286
lung	pulmonary artery endothelial cell	3593	0.0005	female	XIST	2.20546	0.332389	1667	46.3958
large intestine	intestinal enteroendocrine cell	194	0.0007	female	XIST	2.03279	0.262224	90	46.3918
stomach	T cell	2658	0.0144	female	XIST	2.16526	0.316051	1232	46.3506
hindlimb	contractile cell	1733	0.0094	female	XIST	1.89836	0.207597	803	46.3358
musculature	skeletal muscle fibroblast	2110	0.0026	female	XIST	2.59884	0.492241	977	46.3033
breast	effector memory CD8-positive, alpha-beta T cell	7775	0.0015	female	XIST	2.03802	0.264349	3596	46.2508
lymph node	hematopoietic precursor cell	80	0.0001	female	XIST	2.14865	0.309301	37	46.25
bone marrow	CD14-positive monocyte	19266	0.0165	female	XIST	2.09922	0.289218	8905	46.2213
eye	endothelial cell of lymphatic vessel	751	0.0001	female	XIST	2.53224	0.465179	347	46.2051
stomach	natural T-regulatory cell	840	0.0045	female	XIST	2.10043	0.289707	388	46.1905
kidney	mesenchymal cell	3963	0.0016	female	XIST	1.93507	0.222512	1830	46.1771
eye	fibroblast	14605	0.0018	female	XIST	2.38566	0.405615	6742	46.1623
breast	plasmacytoid dendritic cell	104	0	female	XIST	2.34142	0.387636	48	46.1538
lung	ionocyte	78	0	female	XIST	2.03294	0.262284	36	46.1538
spleen	erythroblast	13	0	female	XIST	2.49436	0.449785	6	46.1538
stomach	innate lymphoid cell	65	0.0003	female	XIST	2.15177	0.310573	30	46.1538
blood	IgG memory B cell	1205	0.0001	female	XIST	1.81524	0.173819	556	46.1411
breast	keratinocyte	297	0.0001	female	XIST	1.65363	0.108145	137	46.1279
hindlimb	cell	24381	0.1313	female	XIST	1.87715	0.198975	11235	46.081
kidney	plasma cell	823	0.0003	female	XIST	2.60712	0.495606	379	46.051
exocrine gland	mucus secreting cell	50	0.0002	female	XIST	2.22376	0.339824	23	46
skin of body	melanocyte of skin	87	0.0001	female	XIST	2.62222	0.501744	40	45.977
stomach	mature alpha-beta T cell	2062	0.011	female	XIST	2.13651	0.304371	948	45.9748
musculature	supporting cell	4291	0.0053	female	XIST	2.1089	0.293152	1972	45.9567
mucosa	lymphocyte	9600	0.0418	female	XIST	2.3041	0.372472	4411	45.9479
eye	connective tissue cell	15282	0.0019	female	XIST	2.39109	0.40782	7021	45.9429
liver	hepatoblast	8419	0.0034	female	XIST	2.56264	0.477533	3867	45.9318
endocrine gland	macrophage	1159	0.0014	female	XIST	2.00251	0.249919	532	45.9016
esophagus	mast cell	181	0.0006	female	XIST	2.55918	0.476127	83	45.8564
heart	blood cell	24	0	female	XIST	2.13968	0.30566	11	45.8333
mucosa	leukocyte	14864	0.0645	female	XIST	2.31839	0.37828	6807	45.7952
lung	pericyte	6766	0.001	female	XIST	2.19416	0.327798	3093	45.7139
pleural fluid	dendritic cell	777	0.0043	female	XIST	1.82202	0.176574	355	45.6885
lung	precursor cell	71064	0.0101	female	XIST	2.13181	0.302461	32464	45.6828
bone marrow	CD4-positive, alpha-beta memory T cell	12094	0.0102	female	XIST	2.12324	0.298977	5522	45.659
kidney	cell	500783	0.2013	female	XIST	2.31248	0.375877	228607	45.6499
lung	supporting cell	10160	0.0014	female	XIST	2.25164	0.351153	4625	45.5217
breast	connective tissue cell	549675	0.1066	female	XIST	2.07495	0.279353	249929	45.4685
bone marrow	professional antigen presenting cell	17499	0.0147	female	XIST	2.08408	0.283066	7951	45.4369
lung	columnar/cuboidal epithelial cell	2037	0.0003	female	XIST	2.08784	0.284591	925	45.4099
stomach	mature T cell	2361	0.0125	female	XIST	2.13654	0.304383	1071	45.3621
hindlimb	stromal cell	688	0.0036	female	XIST	1.91965	0.216247	312	45.3488
liver	mesothelial cell	86	0	female	XIST	2.35583	0.393495	39	45.3488
blood	plasmacytoid dendritic cell	12763	0.0006	female	XIST	1.97459	0.238571	5785	45.3263
lung	glial cell	342	0	female	XIST	2.05527	0.271357	155	45.3216
endocrine gland	early T lineage precursor	203	0.0002	female	XIST	1.98574	0.243105	92	45.3202
eye	monocyte	395	0	female	XIST	1.9782	0.240041	179	45.3165
bone marrow	hematopoietic multipotent progenitor cell	6946	0.0058	female	XIST	2.10802	0.292792	3147	45.3067
kidney	CD4-positive helper T cell	181	0.0001	female	XIST	1.98934	0.244564	82	45.3039
kidney	columnar/cuboidal epithelial cell	156213	0.0623	female	XIST	2.36075	0.395491	70745	45.2875
lung	regulatory T cell	12895	0.0018	female	XIST	2.19259	0.327157	5833	45.2346
mucosa	myeloid leukocyte	3834	0.0164	female	XIST	2.39621	0.409902	1732	45.1748
eye	lymphocyte	1450	0.0002	female	XIST	2.13704	0.304587	655	45.1724
musculature	naive T cell	744	0.0009	female	XIST	1.94324	0.225834	336	45.1613
fallopian tube	smooth muscle cell	9141	0.0188	female	XIST	1.99809	0.248123	4127	45.1482
lung	adventitial cell	3394	0.0005	female	XIST	2.36767	0.398306	1532	45.1385
breast	endothelial cell of artery	18297	0.0035	female	XIST	2.18657	0.324714	8254	45.1112
small intestine	intestinal enteroendocrine cell	102	0.0001	female	XIST	2.00431	0.25065	46	45.098
fallopian tube	cell	219015	0.451	female	XIST	2.05048	0.26941	98770	45.0974
lung	progenitor cell	63354	0.0089	female	XIST	2.11986	0.297605	28570	45.0958
endocrine gland	double negative thymocyte	24168	0.0288	female	XIST	1.93288	0.221624	10898	45.0927
eye	endothelial cell of vascular tree	1766	0.0002	female	XIST	2.33647	0.385624	796	45.0736
lung	alveolar type 2 fibroblast cell	3167	0.0004	female	XIST	2.47926	0.443651	1427	45.0584
liver	myeloid leukocyte	92212	0.036	female	XIST	2.16809	0.317204	41470	44.9725
breast	vascular associated smooth muscle cell	27849	0.0053	female	XIST	2.00052	0.24911	12508	44.9136
lung	perivascular cell	9098	0.0013	female	XIST	2.18686	0.324829	4083	44.878
esophagus	dendritic cell	328	0.001	female	XIST	2.30236	0.371766	147	44.8171
fallopian tube	fallopian tube secretory epithelial cell	2098	0.0043	female	XIST	1.96195	0.233437	940	44.8046
endocrine gland	CD4-positive, alpha-beta T cell	12760	0.0151	female	XIST	2.0341	0.262753	5714	44.7806
esophagus	blood vessel endothelial cell	1200	0.0036	female	XIST	2.09088	0.285828	537	44.75
pancreas	endothelial cell of vascular tree	2132	0.0054	female	XIST	2.55116	0.472869	954	44.7467
liver	mononuclear phagocyte	96324	0.0374	female	XIST	2.15662	0.312541	43093	44.7376
liver	phagocyte	96325	0.0374	female	XIST	2.15662	0.312541	43093	44.7371
bone marrow	CD16-negative, CD56-bright natural killer cell, human	1938	0.0016	female	XIST	2.08108	0.281844	867	44.7368
small intestine	enteroendocrine cell	2497	0.0014	female	XIST	2.07607	0.27981	1116	44.6936
breast	mononuclear cell	191135	0.0364	female	XIST	2.06115	0.273747	85315	44.636
breast	fibroblast	508206	0.0966	female	XIST	2.0634	0.274661	226507	44.5699
hindlimb	muscle fibroblast	3968	0.0207	female	XIST	1.83058	0.180053	1768	44.5565
stomach	activated CD8-positive, alpha-beta T cell	1017	0.0053	female	XIST	2.17336	0.319345	453	44.5428
large intestine	capillary endothelial cell	155	0.0005	female	XIST	2.26902	0.358217	69	44.5161
endocrine gland	myeloid leukocyte	1936	0.0023	female	XIST	1.98019	0.240846	861	44.4731
exocrine gland	CD4-positive, alpha-beta T cell	3084	0.0137	female	XIST	2.31329	0.376205	1371	44.4553
lung	epithelial cell of distal tubule	36	0	female	XIST	2.66243	0.518085	16	44.4444
small intestine	progenitor cell of endocrine pancreas	18	0	female	XIST	1.7547	0.149219	8	44.4444
breast	hematopoietic cell	231412	0.0439	female	XIST	2.08169	0.282094	102842	44.4411
exocrine gland	myeloid leukocyte	1565	0.007	female	XIST	2.27258	0.359664	695	44.4089
breast	secretory cell	218613	0.0414	female	XIST	1.93125	0.220958	97065	44.4004
adrenal gland	cell	80614	0.257	female	XIST	2.60053	0.49293	35767	44.3682
mucosa	T cell	6730	0.0283	female	XIST	2.38205	0.404147	2985	44.3536
exocrine gland	myeloid cell	1570	0.007	female	XIST	2.27274	0.359727	696	44.3312
lung	contractile cell	18288	0.0025	female	XIST	2.17536	0.320157	8093	44.2531
lung	CD4-positive helper T cell	1397	0.0002	female	XIST	2.03134	0.261634	618	44.2377
placenta	cell	244978	0.2215	female	XIST	2.26811	0.357847	108325	44.2183
placenta	stromal cell	90167	0.0815	female	XIST	2.28152	0.363298	39845	44.1902
kidney	vasa recta ascending limb cell	206	0.0001	female	XIST	2.20817	0.333488	91	44.1748
lung	pulmonary interstitial fibroblast	6806	0.0009	female	XIST	2.34984	0.391059	3005	44.1522
bladder organ	plasma cell	1138	0.0189	female	XIST	1.84891	0.1875	502	44.1125
exocrine gland	mature alpha-beta T cell	5437	0.024	female	XIST	2.38881	0.406896	2398	44.1052
hindlimb	secretory cell	329	0.0017	female	XIST	1.92921	0.220132	145	44.0729
bladder organ	pericyte	708	0.0118	female	XIST	1.89947	0.208046	312	44.0678
lung	monocyte	56734	0.0078	female	XIST	2.10295	0.290732	24994	44.0547
adrenal gland	dendritic cell	243	0.0008	female	XIST	1.99759	0.24792	107	44.0329
mucosa	plasmacytoid dendritic cell	318	0.0013	female	XIST	1.96057	0.232874	140	44.0252
adrenal gland	collagen secreting cell	25	0.0001	female	XIST	2.49406	0.449663	11	44
bone marrow	naive T cell	24279	0.0198	female	XIST	2.15779	0.313016	10681	43.9928
liver	endothelial cell of artery	571	0.0002	female	XIST	2.02961	0.260929	251	43.958
exocrine gland	T cell	8358	0.0367	female	XIST	2.26514	0.356641	3670	43.91
exocrine gland	effector CD8-positive, alpha-beta T cell	1123	0.0049	female	XIST	2.55672	0.475127	493	43.9003
blood	effector CD4-positive, alpha-beta T cell	6627	0.0003	female	XIST	1.89802	0.207456	2908	43.8811
breast	leukocyte	222161	0.0416	female	XIST	2.06191	0.274056	97432	43.8565
lung	neural cell	2702	0.0004	female	XIST	2.21222	0.335136	1185	43.8564
lung	CD16-positive, CD56-dim natural killer cell, human	2951	0.0004	female	XIST	2.09098	0.28587	1293	43.8157
liver	monocyte	17264	0.0066	female	XIST	2.00711	0.251785	7564	43.8137
endocrine gland	naive B cell	1535	0.0018	female	XIST	2.03876	0.264648	672	43.7785
esophagogastric junction	macrophage	48	0.0018	female	XIST	2.06239	0.274249	21	43.75
exocrine gland	myofibroblast cell	32	0.0001	female	XIST	1.90142	0.208838	14	43.75
lung	neuron	2360	0.0003	female	XIST	2.23584	0.344734	1030	43.6441
adrenal gland	blood vessel endothelial cell	204	0.0006	female	XIST	2.72164	0.542143	89	43.6275
hindlimb	chondrocyte	321	0.0016	female	XIST	1.93144	0.221037	140	43.6137
lung	endothelial cell of lymphatic vessel	6861	0.0009	female	XIST	2.22574	0.340627	2992	43.6088
adrenal gland	endothelial cell of vascular tree	1071	0.0034	female	XIST	2.73167	0.546218	467	43.6041
liver	mononuclear cell	245904	0.0931	female	XIST	2.14724	0.308732	107194	43.5918
liver	myofibroblast cell	117	0	female	XIST	1.80658	0.170299	51	43.5897
bone marrow	CD4-positive, alpha-beta T cell	32331	0.0261	female	XIST	2.13188	0.302486	14092	43.5867
small intestine	intestinal crypt stem cell	340	0.0002	female	XIST	1.88298	0.201347	148	43.5294
bone marrow	regulatory T cell	1112	0.0009	female	XIST	2.0078	0.252069	484	43.5252
liver	professional antigen presenting cell	83127	0.0314	female	XIST	2.18125	0.32255	36174	43.5165
heart	erythrocyte	23	0	female	XIST	2.13869	0.305256	10	43.4783
mucosa	gamma-delta T cell	444	0.0018	female	XIST	2.06185	0.274031	193	43.4685
ovary	epithelial cell	7448	0.0513	female	XIST	2.21043	0.33441	3237	43.4613
endocrine gland	thymocyte	86398	0.0991	female	XIST	1.9023	0.209195	37523	43.4304
fallopian tube	epithelial cell	42798	0.0849	female	XIST	2.13487	0.303704	18584	43.4226
tongue	leukocyte	1599	0.0468	female	XIST	2.10104	0.289955	694	43.4021
brain	vascular associated smooth muscle cell	406	0	female	XIST	2.38778	0.406474	176	43.3498
uterus	T cell	609	0.0024	female	XIST	1.96233	0.233591	264	43.3498
endocrine gland	early lymphoid progenitor	30	0	female	XIST	1.70108	0.127427	13	43.3333
endocrine gland	pro-T cell	5057	0.0058	female	XIST	1.74799	0.14649	2190	43.3063
endocrine gland	lymphoid lineage restricted progenitor cell	5064	0.0058	female	XIST	1.74826	0.146602	2193	43.3057
eye	natural killer cell	164	0	female	XIST	1.83787	0.183016	71	43.2927
ureter	intermediate cell of urothelium	1422	0.0173	female	XIST	1.75142	0.147885	615	43.2489
liver	leukocyte	249498	0.0937	female	XIST	2.14577	0.308132	107850	43.2268
bone marrow	naive thymus-derived CD4-positive, alpha-beta T cell	18513	0.0148	female	XIST	2.14874	0.309341	7999	43.2075
large intestine	vein endothelial cell	88	0.0003	female	XIST	2.24031	0.346549	38	43.1818
fallopian tube	mononuclear cell	47864	0.0943	female	XIST	2.03334	0.262446	20662	43.1681
colon	mature NK T cell	51	0	female	XIST	1.83135	0.180364	22	43.1373
small intestine	erythroblast	102	0.0001	female	XIST	1.76186	0.152127	44	43.1373
breast	CD8-positive, alpha-beta T cell	43270	0.008	female	XIST	2.06354	0.274716	18663	43.1315
fallopian tube	leukocyte	51697	0.1018	female	XIST	2.03134	0.261632	22294	43.1244
fallopian tube	contractile cell	34725	0.0683	female	XIST	1.95816	0.231896	14967	43.1015
hindlimb	muscle cell	1123	0.0057	female	XIST	1.86982	0.195999	484	43.0988
heart	endocardial cell	1919	0.0005	female	XIST	2.21275	0.33535	827	43.0954
endocrine gland	cell	161832	0.1842	female	XIST	1.94101	0.224925	69733	43.0897
liver	erythroblast	5478	0.002	female	XIST	2.69171	0.529981	2359	43.0632
musculature	lymphocyte	9410	0.0109	female	XIST	2.09712	0.288362	4041	42.9437
breast	cell	2344924	0.4289	female	XIST	2.07001	0.277348	1005672	42.8872
eye	melanocyte	7707	0.0009	female	XIST	2.25637	0.353075	3305	42.8831
skin of body	Merkel cell	674	0.0004	female	XIST	1.71129	0.131579	289	42.8783
esophagus	endothelial cell of artery	56	0.0002	female	XIST	2.61921	0.500519	24	42.8571
liver	epithelial cell of nephron	14	0	female	XIST	1.86382	0.193561	6	42.8571
liver	lymphocyte	149580	0.0557	female	XIST	2.14094	0.306171	64101	42.854
bone marrow	memory T cell	21194	0.0168	female	XIST	2.14739	0.308789	9082	42.8518
skin of body	columnar/cuboidal epithelial cell	675	0.0004	female	XIST	1.71129	0.131579	289	42.8148
large intestine	mesodermal cell	1024	0.0033	female	XIST	2.03646	0.263712	438	42.7734
fallopian tube	mast cell	3811	0.0074	female	XIST	2.00649	0.251537	1629	42.7447
uterus	lymphocyte	627	0.0024	female	XIST	1.95994	0.232618	268	42.7432
ovary	granulosa cell	4298	0.0291	female	XIST	2.15615	0.312349	1837	42.7408
blood	CD4-positive, CD25-positive, alpha-beta regulatory T cell	695	0	female	XIST	2.01463	0.254841	297	42.7338
bone marrow	alpha-beta T cell	48505	0.0383	female	XIST	2.14548	0.308014	20724	42.7255
adrenal gland	IgG plasma cell	96	0.0003	female	XIST	2.20011	0.330214	41	42.7083
bone marrow	mature alpha-beta T cell	48438	0.0383	female	XIST	2.14434	0.30755	20679	42.6917
large intestine	enteroendocrine cell	415	0.0013	female	XIST	2.05964	0.273132	177	42.6506
bone marrow	adipocyte	272	0.0002	female	XIST	1.89073	0.204494	116	42.6471
liver	skeletal muscle satellite cell	61	0	female	XIST	1.85389	0.189523	26	42.623
bone marrow	mature T cell	48787	0.0385	female	XIST	2.14259	0.306839	20793	42.62
intestine	cell	20216	0.2154	female	XIST	2.57349	0.48194	8609	42.5851
exocrine gland	IgA plasma cell	1971	0.0084	female	XIST	1.97563	0.238993	839	42.5672
liver	early lymphoid progenitor	174	0.0001	female	XIST	1.85468	0.189845	74	42.5287
brain	dendritic cell	2569	0.0001	female	XIST	2.1008	0.28986	1092	42.5068
endocrine gland	lymphocyte	127814	0.1434	female	XIST	1.93555	0.222706	54296	42.4805
lung	vascular associated smooth muscle cell	2332	0.0003	female	XIST	2.16404	0.315556	990	42.4528
endocrine gland	fibroblast	7973	0.0089	female	XIST	1.9256	0.218664	3384	42.4432
bone marrow	T cell	49337	0.0387	female	XIST	2.14287	0.306955	20934	42.4306
fallopian tube	endothelial cell of lymphatic vessel	6298	0.0122	female	XIST	2.00568	0.251206	2672	42.4262
small intestine	type I enteroendocrine cell	33	0	female	XIST	1.89448	0.206017	14	42.4242
exocrine gland	epithelial cell	28735	0.1221	female	XIST	2.15387	0.311422	12189	42.4187
musculature	endothelial cell of lymphatic vessel	302	0.0003	female	XIST	2.37631	0.401814	128	42.3841
endocrine gland	leukocyte	132035	0.1478	female	XIST	1.93591	0.222854	55955	42.3789
endocrine gland	mononuclear cell	131892	0.1477	female	XIST	1.93568	0.222759	55890	42.3756
breast	T cell	120810	0.0218	female	XIST	2.08199	0.282216	51191	42.3731
kidney	vein endothelial cell	439	0.0002	female	XIST	2.11087	0.293951	186	42.369
bone marrow	effector memory CD8-positive, alpha-beta T cell	5587	0.0044	female	XIST	2.21143	0.334815	2367	42.3662
mucosa	neutrophil	668	0.0027	female	XIST	2.09333	0.286824	283	42.3653
small intestine	mature NK T cell	2876	0.0015	female	XIST	1.80936	0.171428	1218	42.3505
intestine	chromaffin cell	111	0.0012	female	XIST	2.71693	0.540228	47	42.3423
esophagus	leukocyte	3066	0.0088	female	XIST	2.46352	0.437252	1298	42.3353
endocrine gland	hematopoietic cell	138106	0.1541	female	XIST	1.92804	0.219657	58346	42.2473
endocrine gland	T cell	121099	0.1351	female	XIST	1.926	0.218826	51154	42.2415
lung	Schwann cell	109	0	female	XIST	2.37383	0.400806	46	42.2018
esophagogastric junction	glandular cell of esophagus	64	0.0023	female	XIST	1.81086	0.172037	27	42.1875
breast	luminal epithelial cell of mammary gland	676178	0.1216	female	XIST	1.97675	0.23945	285189	42.1766
esophagus	hematopoietic cell	3081	0.0088	female	XIST	2.46274	0.436935	1299	42.1616
adrenal gland	stromal cell	954	0.0029	female	XIST	2.77683	0.56457	402	42.1384
nose	club cell	13805	0.0214	female	XIST	1.9217	0.217079	5812	42.1007
lung	blood vessel smooth muscle cell	677	0.0001	female	XIST	2.37405	0.400896	285	42.0975
large intestine	blood vessel endothelial cell	278	0.0009	female	XIST	2.2603	0.354673	117	42.0863
endocrine gland	connective tissue cell	8320	0.0092	female	XIST	1.92027	0.216498	3501	42.0793
mucosa	natural killer cell	504	0.002	female	XIST	2.17246	0.31898	212	42.0635
esophagus	mononuclear cell	2880	0.0082	female	XIST	2.45526	0.433896	1211	42.0486
mucosa	conventional dendritic cell	1104	0.0044	female	XIST	2.11525	0.295729	464	42.029
endocrine gland	monocyte	657	0.0007	female	XIST	1.93892	0.224076	276	42.0091
lung	myeloid dendritic cell, human	50	0	female	XIST	1.63597	0.100971	21	42
spleen	CD141-positive myeloid dendritic cell	50	0.0001	female	XIST	1.81028	0.171803	21	42
lung	smooth muscle cell	8225	0.0011	female	XIST	2.13228	0.30265	3453	41.9818
bone marrow	mononuclear phagocyte	40031	0.0311	female	XIST	2.05509	0.271285	16793	41.95
mucosa	squamous epithelial cell	10144	0.0403	female	XIST	2.1562	0.31237	4255	41.946
small intestine	squamous epithelial cell	4649	0.0024	female	XIST	2.12584	0.300033	1949	41.923
placenta	lymphocyte of B lineage	912	0.0008	female	XIST	2.06158	0.27392	382	41.886
mucosa	vascular associated smooth muscle cell	1719	0.0068	female	XIST	2.1651	0.315988	720	41.8848
breast	lymphocyte	148496	0.0265	female	XIST	2.06552	0.275522	62114	41.8287
endocrine gland	progenitor cell	6070	0.0067	female	XIST	1.77109	0.155876	2539	41.8287
lung	dendritic cell, human	189	0	female	XIST	1.77788	0.158636	79	41.7989
heart	visceromotor neuron	134	0	female	XIST	2.31975	0.37883	56	41.791
breast	mature T cell	111014	0.0198	female	XIST	2.04068	0.265429	46378	41.7767
musculature	fibroblast of the aortic adventitia	1919	0.0022	female	XIST	2.02834	0.260414	801	41.7405
intestine	myeloid cell	544	0.0057	female	XIST	2.65504	0.515078	227	41.7279
liver	stem cell	10140	0.0037	female	XIST	2.50835	0.455471	4231	41.7258
breast	plasma cell	6574	0.0012	female	XIST	1.89048	0.204392	2742	41.7098
small intestine	endothelial cell of lymphatic vessel	1456	0.0008	female	XIST	2.00798	0.252142	607	41.6896
exocrine gland	neutrophil	12	0.0001	female	XIST	2.28919	0.366412	5	41.6667
lung	deuterosomal cell	36	0	female	XIST	2.02696	0.259852	15	41.6667
yolk sac	keratinocyte	24	0.0002	female	XIST	1.8838	0.201677	10	41.6667
placenta	regulatory T cell	1076	0.0009	female	XIST	2.19735	0.329094	448	41.6357
exocrine gland	cell	65693	0.2737	female	XIST	2.17724	0.320921	27336	41.6117
exocrine gland	mature T cell	5765	0.024	female	XIST	2.38881	0.406896	2398	41.5958
bone marrow	phagocyte	40458	0.0311	female	XIST	2.05492	0.271215	16814	41.5591
bladder organ	mast cell	987	0.0154	female	XIST	2.04133	0.265694	410	41.54
bone marrow	CD8-positive, alpha-beta T cell	15439	0.0119	female	XIST	2.17754	0.321043	6413	41.5377
bone marrow	mononuclear cell	126926	0.0975	female	XIST	2.10763	0.292633	52700	41.5203
breast	mature alpha-beta T cell	108663	0.0192	female	XIST	2.04046	0.265338	45098	41.5026
endocrine gland	cell of skeletal muscle	253	0.0003	female	XIST	1.99885	0.248429	105	41.502
large intestine	progenitor cell	1559	0.0048	female	XIST	1.78782	0.162675	647	41.501
stomach	brush cell	176	0.0009	female	XIST	2.7398	0.549522	73	41.4773
endocrine gland	precursor cell	6235	0.0068	female	XIST	1.76927	0.155136	2584	41.4435
placenta	connective tissue cell	98025	0.083	female	XIST	2.27739	0.361619	40603	41.4211
exocrine gland	CD8-positive, alpha-beta T cell	1937	0.008	female	XIST	2.57687	0.483315	802	41.4042
breast	Tc1 cell	1302	0.0002	female	XIST	2.05297	0.270423	539	41.3978
hindlimb	precursor cell	5583	0.027	female	XIST	1.85971	0.191888	2310	41.3756
lung	lung resident memory CD8-positive, alpha-beta T cell	1113	0.0001	female	XIST	2.30465	0.372696	460	41.3297
bone marrow	lymphocyte	86895	0.0664	female	XIST	2.13219	0.302616	35907	41.3223
exocrine gland	contractile cell	3186	0.0132	female	XIST	2.20056	0.330397	1316	41.3057
axilla	monocyte	339	0.0017	female	XIST	1.71486	0.133027	140	41.2979
exocrine gland	supporting cell	620	0.0026	female	XIST	2.05581	0.271575	256	41.2903
stomach	enteroendocrine cell	2529	0.0122	female	XIST	2.08257	0.282451	1044	41.2811
stomach	lymphocyte	4070	0.0196	female	XIST	2.14194	0.306577	1679	41.2531
small intestine	neural cell	9173	0.0047	female	XIST	2.10258	0.290584	3783	41.2406
stomach	endocrine cell	2540	0.0122	female	XIST	2.08329	0.282745	1047	41.2205
bone marrow	immature natural killer cell	17	0	female	XIST	1.65839	0.11008	7	41.1765
heart	B cell	464	0.0001	female	XIST	2.26041	0.354718	191	41.1638
stomach	memory T cell	299	0.0014	female	XIST	2.13679	0.304484	123	41.1371
esophagogastric junction	myeloid leukocyte	90	0.0031	female	XIST	2.00593	0.251309	37	41.1111
small intestine	activated CD4-positive, alpha-beta T cell, human	90	0	female	XIST	1.73029	0.139298	37	41.1111
bone marrow	CD8-positive, alpha-beta memory T cell, CD45RO-positive	7743	0.0059	female	XIST	2.1957	0.328423	3182	41.0952
lung	helper T cell	275	0	female	XIST	1.89246	0.205198	113	41.0909
bone marrow	myeloid lineage restricted progenitor cell	27299	0.0208	female	XIST	1.97686	0.239495	11217	41.0894
blood	activated CD8-positive, alpha-beta T cell, human	222	0	female	XIST	1.77618	0.157946	91	40.991
exocrine gland	CD8-positive, alpha-beta cytotoxic T cell	653	0.0027	female	XIST	2.63746	0.507937	267	40.8882
bone marrow	leukocyte	131945	0.0998	female	XIST	2.10626	0.292078	53944	40.8837
pleural fluid	natural killer cell	345	0.0017	female	XIST	1.89113	0.204658	141	40.8696
bone marrow	effector memory CD4-positive, alpha-beta T cell	5500	0.0042	female	XIST	2.06927	0.277046	2246	40.8364
eye	B cell	98	0	female	XIST	1.96479	0.23459	40	40.8163
heart	vascular associated smooth muscle cell	4402	0.001	female	XIST	2.19508	0.32817	1796	40.7996
mucosa	secretory cell	1716	0.0066	female	XIST	2.39791	0.410591	700	40.7925
uterus	uterine smooth muscle cell	7944	0.029	female	XIST	2.12109	0.298103	3240	40.7855
kidney	vasa recta descending limb cell	233	0.0001	female	XIST	2.01767	0.256079	95	40.7725
esophagogastric junction	fibroblast	27	0.0009	female	XIST	1.91386	0.213894	11	40.7407
hindlimb	early lymphoid progenitor	27	0.0001	female	XIST	1.9441	0.226183	11	40.7407
musculature	CD16-negative, CD56-bright natural killer cell, human	162	0.0002	female	XIST	1.96178	0.233365	66	40.7407
neck	B cell	27	0.0009	female	XIST	1.8778	0.199242	11	40.7407
vasculature	mast cell	302	0.0005	female	XIST	1.99033	0.244968	123	40.7285
endocrine gland	hematopoietic precursor cell	5843	0.0063	female	XIST	1.74367	0.144735	2379	40.7154
esophagogastric junction	myeloid cell	91	0.0031	female	XIST	2.00593	0.251309	37	40.6593
lung	muscle cell	8656	0.0011	female	XIST	2.12613	0.300151	3519	40.6539
lymph node	plasmacytoid dendritic cell	369	0.0004	female	XIST	1.93054	0.220672	150	40.6504
bone marrow	precursor cell	102944	0.0774	female	XIST	2.03662	0.263777	41839	40.6425
bone marrow	progenitor cell	102793	0.0773	female	XIST	2.03675	0.263833	41777	40.6419
large intestine	type EC enteroendocrine cell	160	0.0005	female	XIST	2.04347	0.266562	65	40.625
stomach	mononuclear cell	4449	0.021	female	XIST	2.13781	0.304898	1806	40.5934
breast	IgA plasma cell	5078	0.0009	female	XIST	1.84423	0.185597	2060	40.5672
stomach	leukocyte	4660	0.022	female	XIST	2.13347	0.303135	1886	40.4721
blood	immature neutrophil	388	0	female	XIST	1.985	0.242801	157	40.4639
vasculature	pericyte	388	0.0006	female	XIST	1.93511	0.222528	157	40.4639
brain	stem cell	151	0	female	XIST	2.76306	0.558976	61	40.3974
pleural fluid	professional antigen presenting cell	1183	0.0057	female	XIST	1.82741	0.178764	477	40.3212
mucosa	mature NK T cell	397	0.0015	female	XIST	2.29816	0.370059	160	40.3023
lung	B cell	30092	0.0038	female	XIST	2.10311	0.290797	12127	40.2997
hindlimb	progenitor cell	4680	0.022	female	XIST	1.8456	0.186154	1886	40.2991
fallopian tube	lymphocyte	33061	0.0608	female	XIST	2.00288	0.250068	13321	40.2922
lung	lymphocyte of B lineage	53378	0.0067	female	XIST	2.13068	0.302	21503	40.2844
brain	mesenchymal stem cell	149	0	female	XIST	2.76179	0.55846	60	40.2685
lung	plasma cell	23286	0.0029	female	XIST	2.16633	0.316489	9376	40.2645
stomach	hematopoietic cell	4711	0.0221	female	XIST	2.13472	0.303644	1895	40.225
small intestine	capillary endothelial cell	1917	0.001	female	XIST	2.08916	0.285129	771	40.2191
bone marrow	mature B cell	6167	0.0046	female	XIST	2.15719	0.312773	2479	40.1978
eye	lymphocyte of B lineage	102	0	female	XIST	1.95828	0.231944	41	40.1961
lung	lung ciliated cell	4028	0.0005	female	XIST	1.91145	0.212914	1618	40.1688
bone marrow	common dendritic progenitor	558	0.0004	female	XIST	1.98624	0.243304	224	40.1434
breast	mammary gland epithelial cell	889158	0.152	female	XIST	1.99151	0.245447	356509	40.0951
adrenal gland	mature B cell	10	0	female	XIST	1.50132	0.0462554	4	40
intestine	progenitor cell	10	0.0001	female	XIST	2.60789	0.495919	4	40
intestine	endocrine cell	120	0.0012	female	XIST	2.69016	0.529351	48	40
kidney	fraction A pre-pro B cell	10	0	female	XIST	1.60975	0.0903135	4	40
breast	contractile cell	203450	0.0347	female	XIST	2.10063	0.289788	81324	39.9725
breast	CD4-positive, alpha-beta T cell	61428	0.0105	female	XIST	2.02097	0.257418	24538	39.946
bone marrow	promonocyte	10096	0.0075	female	XIST	2.04321	0.266455	4032	39.9366
mucosa	perivascular cell	3624	0.0137	female	XIST	2.15402	0.311484	1447	39.9283
lymph node	mast cell	268	0.0003	female	XIST	1.98549	0.243001	107	39.9254
lung	neuroendocrine cell	1468	0.0002	female	XIST	2.00337	0.250268	586	39.9183
adrenal gland	connective tissue cell	1133	0.0032	female	XIST	2.68985	0.529227	452	39.8941
lung	efferent neuron	1497	0.0002	female	XIST	2.00972	0.252846	597	39.8798
hindlimb	skeletal muscle myoblast	4308	0.0201	female	XIST	1.83696	0.182644	1717	39.8561
hindlimb	myoblast	4560	0.0212	female	XIST	1.83567	0.182119	1817	39.8465
breast	epithelial cell	1231611	0.2092	female	XIST	2.02669	0.259742	490480	39.8243
musculature	type II muscle cell	12707	0.0137	female	XIST	2.2609	0.354919	5059	39.8127
mucosa	mature T cell	3834	0.0145	female	XIST	2.20955	0.334049	1526	39.8018
placenta	B cell	676	0.0006	female	XIST	2.05441	0.271007	269	39.7929
lung	mast cell	13941	0.0017	female	XIST	2.1052	0.291647	5545	39.7748
pleural fluid	CD1c-positive myeloid dendritic cell	511	0.0024	female	XIST	1.73813	0.142484	203	39.726
lung	lung pericyte	1280	0.0002	female	XIST	2.35494	0.393133	508	39.6875
lamina propria	gamma-delta T cell	1278	0.0215	female	XIST	1.95114	0.229043	507	39.6714
lung	endocrine cell	1669	0.0002	female	XIST	1.98284	0.241924	661	39.6046
breast	precursor cell	462068	0.078	female	XIST	1.98743	0.24379	182944	39.5924
endocrine gland	alpha-beta T cell	64348	0.0672	female	XIST	1.97325	0.238029	25445	39.5428
endocrine gland	mature alpha-beta T cell	24126	0.0252	female	XIST	1.99019	0.244913	9536	39.5258
placenta	innate lymphoid cell	40650	0.0328	female	XIST	2.13699	0.304566	16059	39.5055
lung	cell	1057575	0.1297	female	XIST	2.15043	0.310028	417508	39.4779
breast	memory B cell	7293	0.0012	female	XIST	1.97924	0.240464	2879	39.4762
musculature	fast muscle cell	13029	0.0139	female	XIST	2.26697	0.357382	5143	39.4735
small intestine	gamma-delta T cell	3459	0.0017	female	XIST	1.94267	0.225599	1365	39.4623
endocrine gland	gamma-delta T cell	1345	0.0014	female	XIST	1.84629	0.186438	530	39.4052
musculature	immature neutrophil	33	0	female	XIST	2.0195	0.256823	13	39.3939
bone marrow	endothelial cell of sinusoid	457	0.0003	female	XIST	1.91056	0.212552	180	39.3873
small intestine	interneuron	94	0	female	XIST	1.98521	0.242889	37	39.3617
bone marrow	monocyte	28934	0.0211	female	XIST	2.05916	0.27294	11387	39.3551
large intestine	endothelial cell of vascular tree	460	0.0014	female	XIST	2.21818	0.337555	181	39.3478
heart	cardiac mesenchymal cell	239	0.0001	female	XIST	1.9206	0.216631	94	39.3305
placenta	syncytiotrophoblast cell	1157	0.0009	female	XIST	2.81259	0.5791	455	39.3258
hindlimb	peridermal cell	351	0.0016	female	XIST	1.88484	0.202102	138	39.3162
lung	non-classical monocyte	7972	0.001	female	XIST	1.98119	0.241253	3134	39.3126
brain	plasma cell	863	0	female	XIST	2.31111	0.37532	339	39.2816
lung	smooth muscle cell of the pulmonary artery	584	0.0001	female	XIST	2.35343	0.392519	229	39.2123
lymph node	secretory cell	304	0.0003	female	XIST	2.0179	0.256172	119	39.1447
placenta	decidual natural killer cell, human	36129	0.0289	female	XIST	2.11984	0.297594	14136	39.1265
bone marrow	CD8-positive, alpha-beta memory T cell	9100	0.0066	female	XIST	2.18484	0.324009	3560	39.1209
breast	endothelial cell	342156	0.0571	female	XIST	2.12078	0.297978	133834	39.1149
nose	basal cell of epithelium of trachea	16045	0.0231	female	XIST	2.05172	0.269914	6275	39.1088
lung	effector memory CD4-positive, alpha-beta T cell	2563	0.0003	female	XIST	1.89811	0.207493	1002	39.0948
endocrine gland	mononuclear phagocyte	4078	0.0042	female	XIST	1.94014	0.224572	1594	39.0878
placenta	natural killer cell	38527	0.0308	female	XIST	2.1229	0.298839	15056	39.0791
spleen	early lymphoid progenitor	64	0.0001	female	XIST	1.77416	0.157125	25	39.0625
large intestine	endothelial cell	484	0.0014	female	XIST	2.20842	0.33359	189	39.0496
kidney	dendritic cell, human	210	0.0001	female	XIST	2.19438	0.327884	82	39.0476
breast	vein endothelial cell	61484	0.0102	female	XIST	1.93898	0.224101	23997	39.0297
kidney	epithelial cell of proximal tubule	105878	0.0364	female	XIST	2.43349	0.425051	41303	39.01
kidney	ciliated epithelial cell	105879	0.0364	female	XIST	2.43349	0.425051	41303	39.0096
heart	stem cell	318	0.0001	female	XIST	2.08785	0.284595	124	38.9937
breast	endothelial cell of vascular tree	334797	0.0556	female	XIST	2.12325	0.298983	130433	38.9588
kidney	plasmacytoid dendritic cell, human	190	0.0001	female	XIST	2.20101	0.330579	74	38.9474
small intestine	fibroblast	11857	0.0057	female	XIST	2.16065	0.314181	4615	38.9222
stomach	goblet cell	702	0.0032	female	XIST	2.55716	0.475305	273	38.8889
lung	lung neuroendocrine cell	1334	0.0002	female	XIST	1.9231	0.217649	518	38.8306
bone marrow	lymphoid lineage restricted progenitor cell	11012	0.0079	female	XIST	2.10486	0.291508	4276	38.8304
bone marrow	hematopoietic cell	240518	0.1727	female	XIST	2.07728	0.280301	93372	38.8212
colon	glial cell	516	0.0005	female	XIST	2.06341	0.274665	200	38.7597
placenta	dendritic cell	1391	0.0011	female	XIST	2.17969	0.321916	539	38.7491
small intestine	intestine goblet cell	1459	0.0007	female	XIST	2.06673	0.276014	565	38.7252
musculature	CD4-positive, alpha-beta T cell	2731	0.0029	female	XIST	2.04012	0.265201	1056	38.6672
lung	naive B cell	132	0	female	XIST	2.31359	0.376329	51	38.6364
bone marrow	cell	246442	0.1761	female	XIST	2.07355	0.278784	95187	38.6245
large intestine	mononuclear phagocyte	12552	0.0363	female	XIST	1.85464	0.18983	4848	38.6233
kidney	lymphocyte of B lineage	4144	0.0014	female	XIST	2.17976	0.321945	1598	38.5618
lung	effector CD4-positive, alpha-beta T cell	1717	0.0002	female	XIST	2.33183	0.383741	662	38.5556
spleen	plasmacytoid dendritic cell	763	0.0009	female	XIST	1.92124	0.216893	294	38.5321
bladder organ	fibroblast	4924	0.0715	female	XIST	1.82498	0.177777	1897	38.5256
placenta	lymphocyte	50240	0.0396	female	XIST	2.1308	0.302049	19353	38.5211
small intestine	type EC enteroendocrine cell	1242	0.0006	female	XIST	2.05245	0.270212	478	38.4863
pleural fluid	conventional dendritic cell	538	0.0025	female	XIST	1.7345	0.141009	207	38.4758
bone marrow	endothelial cell	715	0.0005	female	XIST	1.90801	0.211515	275	38.4615
large intestine	type D enteroendocrine cell	13	0	female	XIST	1.60204	0.0871821	5	38.4615
stomach	neuron	195	0.0009	female	XIST	2.53952	0.468136	75	38.4615
brain	mature T cell	28176	0.0007	female	XIST	2.21745	0.33726	10831	38.4405
large intestine	squamous epithelial cell	318	0.0009	female	XIST	2.24263	0.347495	122	38.3648
bladder organ	endothelial cell of lymphatic vessel	73	0.0011	female	XIST	1.78573	0.161826	28	38.3562
breast	unswitched memory B cell	720	0.0001	female	XIST	1.90516	0.21036	276	38.3333
lung	CD4-positive, alpha-beta memory T cell	3121	0.0004	female	XIST	1.94411	0.226187	1194	38.257
lamina propria	conventional dendritic cell	68	0.0011	female	XIST	1.98649	0.243406	26	38.2353
stomach	mast cell	204	0.0009	female	XIST	2.02628	0.259577	78	38.2353
stomach	neural cell	199	0.0009	female	XIST	2.55277	0.473523	76	38.191
scalp	basal cell of epidermis	275	0.0362	female	XIST	1.90938	0.212075	105	38.1818
mucosa	pericyte	1905	0.0069	female	XIST	2.14304	0.307022	727	38.1627
heart	mesenchymal stem cell	76	0	female	XIST	2.61478	0.498719	29	38.1579
bone marrow	epithelial cell	729	0.0005	female	XIST	1.90705	0.211127	278	38.1344
placenta	leukocyte	99956	0.0779	female	XIST	2.12708	0.300538	38111	38.1278
placenta	hematopoietic cell	99983	0.078	female	XIST	2.12715	0.300566	38121	38.1275
bladder organ	epithelial cell	3856	0.0554	female	XIST	2.05446	0.271027	1470	38.1224
placenta	mononuclear cell	99673	0.0777	female	XIST	2.12709	0.300543	37977	38.1016
hindlimb	B cell	21	0.0001	female	XIST	1.68078	0.11918	8	38.0952
endocrine gland	double-positive, alpha-beta thymocyte	36640	0.0368	female	XIST	1.95143	0.229159	13947	38.065
endocrine gland	myeloid cell	2418	0.0024	female	XIST	1.96579	0.234997	919	38.0066
bone marrow	B cell	22654	0.0159	female	XIST	2.12525	0.299795	8609	38.0021
vasculature	connective tissue cell	11998	0.0175	female	XIST	1.86795	0.195238	4559	37.998
lung	natural killer cell	51702	0.0061	female	XIST	2.15578	0.312199	19639	37.985
lung	visceromotor neuron	29	0	female	XIST	2.34764	0.390165	11	37.931
lymph node	type EC enteroendocrine cell	29	0	female	XIST	2.33864	0.386506	11	37.931
nose	progenitor cell	16120	0.0225	female	XIST	1.91934	0.21612	6114	37.928
lung	naive thymus-derived CD4-positive, alpha-beta T cell	1083	0.0001	female	XIST	2.13161	0.302377	410	37.8578
lung	group 1 innate lymphoid cell	51959	0.0061	female	XIST	2.15557	0.312117	19670	37.8568
kidney	glomerular mesangial cell	37	0	female	XIST	1.8368	0.18258	14	37.8378
ovary	mesenchymal stem cell	37	0.0002	female	XIST	2.57001	0.480528	14	37.8378
pancreas	pancreatic epsilon cell	74	0.0002	female	XIST	1.86181	0.192744	28	37.8378
mucosa	helper T cell	2237	0.008	female	XIST	2.21067	0.334505	845	37.7738
vasculature	cell	79851	0.1156	female	XIST	1.87856	0.199547	30141	37.7466
lung	endothelial cell of respiratory system lymphatic vessel	692	0.0001	female	XIST	1.95448	0.2304	261	37.7168
yolk sac	endothelial cell	610	0.0041	female	XIST	1.78107	0.159935	230	37.7049
placenta	myeloid leukocyte	48324	0.0373	female	XIST	2.12158	0.298301	18219	37.7018
placenta	myeloid cell	48349	0.0373	female	XIST	2.1217	0.29835	18228	37.7009
placenta	professional antigen presenting cell	49408	0.0381	female	XIST	2.12332	0.299011	18618	37.6822
placenta	mononuclear phagocyte	49433	0.0381	female	XIST	2.12324	0.298977	18624	37.6752
bone marrow	endothelial tip cell	231	0.0002	female	XIST	1.91458	0.214186	87	37.6623
endocrine gland	mature T cell	27915	0.0278	female	XIST	1.98146	0.241362	10512	37.6572
pleural fluid	mononuclear phagocyte	1920	0.0087	female	XIST	1.82712	0.178646	723	37.6562
brain	hippocampal pyramidal neuron	5845	0.0001	female	XIST	2.52006	0.460229	2201	37.6561
placenta	macrophage	48016	0.037	female	XIST	2.12164	0.298328	18079	37.652
esophagus	monocyte	141	0.0004	female	XIST	1.95058	0.228815	53	37.5887
musculature	naive B cell	197	0.0002	female	XIST	1.97491	0.238701	74	37.5635
liver	natural killer cell	44005	0.0143	female	XIST	2.02163	0.257688	16512	37.523
adipose tissue	neutrophil	32	0	female	XIST	2.7379	0.548749	12	37.5
adrenal gland	megakaryocyte	80	0.0002	female	XIST	2.31861	0.378367	30	37.5
lamina propria	effector memory CD4-positive, alpha-beta T cell	24	0.0004	female	XIST	1.73998	0.143237	9	37.5
lymph node	CD16-positive, CD56-dim natural killer cell, human	32	0	female	XIST	1.82571	0.178074	12	37.5
lung	plasmacytoid dendritic cell	3359	0.0004	female	XIST	2.09183	0.286212	1258	37.4516
nose	nasal mucosa goblet cell	18648	0.0257	female	XIST	1.97104	0.237129	6977	37.4142
fallopian tube	myofibroblast cell	13903	0.0237	female	XIST	1.91565	0.214623	5196	37.3732
stomach	dendritic cell	174	0.0008	female	XIST	2.08822	0.284748	65	37.3563
pleural fluid	regulatory T cell	177	0.0008	female	XIST	1.84627	0.186429	66	37.2881
eye	T cell	612	0.0001	female	XIST	1.86368	0.193501	228	37.2549
lung	naive T cell	1627	0.0002	female	XIST	2.05347	0.270626	606	37.2465
bone marrow	precursor B cell	14970	0.0103	female	XIST	2.10231	0.290473	5572	37.2211
bone marrow	basophil	86	0.0001	female	XIST	2.05652	0.271863	32	37.2093
exocrine gland	plasma cell	3354	0.0125	female	XIST	2.02508	0.259089	1248	37.2093
vasculature	fibroblast	11315	0.0162	female	XIST	1.83402	0.181452	4210	37.2072
lung	enteroendocrine cell	199	0	female	XIST	1.82397	0.177368	74	37.1859
eye	blood vessel endothelial cell	624	0.0001	female	XIST	2.404	0.413066	232	37.1795
musculature	smooth muscle cell	1014	0.001	female	XIST	1.94064	0.224778	377	37.1795
musculature	mature B cell	226	0.0002	female	XIST	1.97596	0.23913	84	37.1681
endocrine gland	stromal cell	175	0.0002	female	XIST	1.83597	0.182242	65	37.1429
musculature	CD4-positive, CD25-positive, alpha-beta regulatory T cell	35	0	female	XIST	1.86762	0.195103	13	37.1429
breast	squamous epithelial cell	297865	0.0472	female	XIST	2.08829	0.284777	110615	37.136
breast	blood vessel endothelial cell	297568	0.0471	female	XIST	2.08883	0.284996	110478	37.127
eye	conjunctival epithelial cell	5778	0.0006	female	XIST	1.98334	0.242128	2145	37.1236
pancreas	mesothelial cell	62	0.0001	female	XIST	2.31673	0.377603	23	37.0968
large intestine	paneth cell of colon	356	0.001	female	XIST	1.6952	0.125041	132	37.0787
endocrine gland	CD8-positive, alpha-beta T cell	6699	0.0066	female	XIST	1.91813	0.21563	2482	37.0503
pancreas	glial cell	270	0.0006	female	XIST	2.69107	0.529722	100	37.037
small intestine	CD16-positive, CD56-dim natural killer cell, human	27	0	female	XIST	2.17749	0.321024	10	37.037
endocrine gland	chondrocyte	154	0.0002	female	XIST	1.74168	0.143925	57	37.013
liver	innate lymphoid cell	45754	0.0147	female	XIST	2.01569	0.255274	16901	36.9388
bone marrow	myeloid leukocyte	34636	0.0237	female	XIST	2.0517	0.269905	12790	36.9269
mucosa	mature alpha-beta T cell	1135	0.004	female	XIST	2.21389	0.335814	419	36.9163
bone marrow	immature B cell	1493	0.001	female	XIST	2.213	0.335454	551	36.9056
breast	basal-myoepithelial cell of mammary gland	145436	0.0229	female	XIST	2.11658	0.29627	53658	36.8946
exocrine gland	vein endothelial cell	263	0.001	female	XIST	1.94271	0.225618	97	36.8821
breast	IgG plasma cell	776	0.0001	female	XIST	1.87091	0.19644	286	36.8557
pancreas	endothelial cell	4100	0.0086	female	XIST	2.37721	0.402181	1510	36.8293
lung	innate lymphoid cell	54585	0.0062	female	XIST	2.15702	0.312703	20093	36.8105
pancreas	stromal cell	2171	0.0045	female	XIST	2.62575	0.503179	799	36.8033
liver	hematopoietic cell	313215	0.1	female	XIST	2.14481	0.307741	115184	36.7747
lung	lymphocyte	331864	0.0379	female	XIST	2.13237	0.302688	121954	36.7482
intestine	hematopoietic cell	1293	0.0119	female	XIST	2.58135	0.485137	475	36.7363
kidney	precursor cell	11903	0.0038	female	XIST	1.92669	0.219109	4371	36.7218
kidney	B cell	3321	0.0011	female	XIST	2.04689	0.267952	1219	36.7058
nose	secretory cell	76431	0.1034	female	XIST	1.97841	0.240124	28039	36.6854
brain	natural killer cell	1369	0	female	XIST	1.94255	0.225554	502	36.6691
lymph node	columnar/cuboidal epithelial cell	30	0	female	XIST	2.33864	0.386506	11	36.6667
lymph node	enteroendocrine cell	30	0	female	XIST	2.33864	0.386506	11	36.6667
ovary	cell	63051	0.3661	female	XIST	2.00671	0.251624	23081	36.6069
spleen	endothelial cell of vascular tree	82	0.0001	female	XIST	2.72372	0.542988	30	36.5854
bone marrow	lymphocyte of B lineage	25802	0.0175	female	XIST	2.1345	0.303553	9436	36.5708
lymph node	CD16-negative, CD56-bright natural killer cell, human	618	0.0006	female	XIST	2.00899	0.25255	226	36.5696
large intestine	macrophage	93	0.0003	female	XIST	2.12247	0.298664	34	36.5591
blood	activated CD4-positive, alpha-beta T cell, human	449	0	female	XIST	1.8826	0.201191	164	36.5256
skin of body	early lymphoid progenitor	107	0.0001	female	XIST	1.77157	0.156072	39	36.4486
breast	fibroblast of breast	6426	0.001	female	XIST	2.03682	0.263859	2341	36.4301
musculature	T cell	5763	0.0057	female	XIST	2.03188	0.261854	2096	36.3699
blood	IgA plasmablast	11	0	female	XIST	1.9258	0.218747	4	36.3636
brain	bronchus fibroblast of lung	33	0	female	XIST	1.85424	0.189668	12	36.3636
kidney	hematopoietic multipotent progenitor cell	22	0	female	XIST	1.71764	0.134157	8	36.3636
large intestine	gut endothelial cell	22	0.0001	female	XIST	1.98764	0.243875	8	36.3636
skin of body	double negative thymocyte	11	0	female	XIST	1.58802	0.0814856	4	36.3636
lung	metallothionein-positive alveolar macrophage	124	0	female	XIST	2.19913	0.329815	45	36.2903
fallopian tube	endothelial cell of vascular tree	10868	0.018	female	XIST	1.9614	0.233211	3944	36.29
lung	fibroblast of lung	28201	0.0032	female	XIST	2.18576	0.324382	10232	36.2824
hindlimb	macrophage	182	0.0008	female	XIST	1.8028	0.168765	66	36.2637
nose	epithelial cell of lower respiratory tract	60167	0.0805	female	XIST	1.96524	0.234773	21815	36.2574
brain	alveolar macrophage	207	0	female	XIST	2.33181	0.383733	75	36.2319
ovary	connective tissue cell	50526	0.2902	female	XIST	1.96479	0.234589	18300	36.219
lamina propria	progenitor cell	58	0.0009	female	XIST	2.03065	0.261354	21	36.2069
musculature	lymphocyte of B lineage	321	0.0003	female	XIST	2.01443	0.254761	116	36.1371
brain	L6 corticothalamic-projecting glutamatergic cortical neuron	1547	0	female	XIST	2.29384	0.368301	559	36.1345
brain	neutrophil	227	0	female	XIST	2.6003	0.492836	82	36.1233
spleen	stromal cell	36	0	female	XIST	2.69963	0.533199	13	36.1111
heart	blood vessel smooth muscle cell	1536	0.0003	female	XIST	1.81659	0.174366	554	36.0677
nose	alternatively activated macrophage	86	0.0001	female	XIST	1.8911	0.204647	31	36.0465
lung	naive thymus-derived CD8-positive, alpha-beta T cell	544	0.0001	female	XIST	1.89002	0.204208	196	36.0294
adrenal gland	endothelial cell	1613	0.0042	female	XIST	2.62867	0.504363	581	36.0198
spleen	myelocyte	50	0.0001	female	XIST	1.90484	0.210228	18	36
kidney	plasmacytoid dendritic cell	442	0.0001	female	XIST	2.11926	0.297359	159	35.9729
blood	IgG-negative class switched memory B cell	2781	0.0001	female	XIST	1.8655	0.19424	1000	35.9583
ovary	stem cell	39	0.0002	female	XIST	2.57001	0.480528	14	35.8974
lung	T cell	223654	0.0249	female	XIST	2.12682	0.300432	80219	35.8675
bladder organ	bladder urothelial cell	2872	0.0388	female	XIST	1.96307	0.233889	1030	35.8635
bone marrow	proerythroblast	53	0	female	XIST	2.29912	0.370448	19	35.8491
breast	lymphocyte of B lineage	20009	0.0031	female	XIST	1.93666	0.223159	7161	35.7889
pleural fluid	B cell	792	0.0034	female	XIST	1.82097	0.176148	283	35.7323
pleural fluid	lymphocyte of B lineage	806	0.0035	female	XIST	1.81838	0.175093	288	35.732
lamina propria	memory B cell	28	0.0004	female	XIST	2.13406	0.303375	10	35.7143
lymph node	fibroblast	70	0.0001	female	XIST	1.92322	0.217697	25	35.7143
musculature	memory B cell	28	0	female	XIST	1.98377	0.242301	10	35.7143
pleural fluid	plasma cell	14	0.0001	female	XIST	1.67142	0.115378	5	35.7143
large intestine	mononuclear cell	14489	0.0387	female	XIST	1.85738	0.190943	5171	35.6891
brain	CD1c-positive myeloid dendritic cell	255	0	female	XIST	1.76244	0.152362	91	35.6863
large intestine	leukocyte	14538	0.0388	female	XIST	1.85702	0.190795	5185	35.6652
brain	radial glial cell	351	0	female	XIST	2.63427	0.506638	125	35.6125
large intestine	hematopoietic cell	14572	0.0389	female	XIST	1.85691	0.190753	5188	35.6025
breast	naive B cell	3267	0.0005	female	XIST	1.95268	0.229669	1162	35.5678
breast	perivascular cell	196740	0.0298	female	XIST	2.00087	0.249252	69959	35.5591
spinal cord	endothelial cell of artery	138	0.0011	female	XIST	2.44762	0.430791	49	35.5072
colon	mesothelial cell	62	0	female	XIST	2.02782	0.260203	22	35.4839
hindlimb	hematopoietic precursor cell	31	0.0001	female	XIST	1.9441	0.226183	11	35.4839
lymph node	group 3 innate lymphoid cell	248	0.0002	female	XIST	2.19986	0.330115	88	35.4839
uterus	ciliated epithelial cell	31	0.0001	female	XIST	1.9634	0.234027	11	35.4839
lung	mucosal invariant T cell	285	0	female	XIST	2.26139	0.355115	101	35.4386
spleen	classical monocyte	2291	0.0025	female	XIST	1.96249	0.233656	811	35.3994
spleen	hematopoietic stem cell	249	0.0003	female	XIST	1.85859	0.191434	88	35.3414
exocrine gland	blood cell	17	0.0001	female	XIST	2.30426	0.372536	6	35.2941
mucosa	mucosal invariant T cell	488	0.0016	female	XIST	2.10948	0.293387	172	35.2459
small intestine	activated CD8-positive, alpha-beta T cell	108	0	female	XIST	2.00211	0.249755	38	35.1852
large intestine	endothelial cell of lymphatic vessel	182	0.0005	female	XIST	2.14117	0.306262	64	35.1648
small intestine	CD16-negative, CD56-bright natural killer cell, human	91	0	female	XIST	1.84518	0.185986	32	35.1648
small intestine	epithelial fate stem cell	74	0	female	XIST	1.74331	0.144588	26	35.1351
nose	precursor cell	35665	0.0462	female	XIST	1.98732	0.243747	12527	35.1241
eye	dendritic cell	57	0	female	XIST	1.94467	0.226413	20	35.0877
esophagus	secretory cell	1565	0.0037	female	XIST	1.98937	0.244577	549	35.0799
exocrine gland	perivascular cell	365	0.0013	female	XIST	2.08722	0.28434	128	35.0685
brain	T cell	35498	0.0008	female	XIST	2.2781	0.361905	12447	35.0639
musculature	mature T cell	5431	0.0051	female	XIST	2.0105	0.253163	1903	35.0396
liver	precursor cell	44062	0.0134	female	XIST	2.23035	0.342504	15429	35.0166
kidney	early lymphoid progenitor	20	0	female	XIST	1.75215	0.148183	7	35
spleen	intermediate monocyte	100	0.0001	female	XIST	1.96697	0.235475	35	35
brain	lymphocyte	39133	0.0009	female	XIST	2.26081	0.354881	13696	34.9986
liver	liver dendritic cell	703	0.0002	female	XIST	1.86885	0.195602	246	34.9929
endocrine gland	plasma cell	223	0.0002	female	XIST	2.08286	0.282568	78	34.9776
spleen	late pro-B cell	63	0.0001	female	XIST	1.85439	0.189725	22	34.9206
skin of body	neuron	1472	0.0007	female	XIST	1.83893	0.183443	514	34.9185
large intestine	precursor cell	2344	0.0061	female	XIST	1.78767	0.162614	818	34.8976
liver	lymphocyte of B lineage	15073	0.0046	female	XIST	2.35382	0.392675	5250	34.8305
esophagogastric junction	secretory cell	428	0.0125	female	XIST	1.82987	0.179763	149	34.8131
yolk sac	vascular associated smooth muscle cell	1873	0.0116	female	XIST	1.7647	0.153279	652	34.8105
mucosa	T-helper 17 cell	250	0.0008	female	XIST	2.26531	0.356711	87	34.8
yolk sac	smooth muscle cell	1874	0.0116	female	XIST	1.7647	0.153279	652	34.7919
hindlimb	leukocyte	325	0.0013	female	XIST	1.80087	0.167979	113	34.7692
yolk sac	contractile cell	1876	0.0116	female	XIST	1.7647	0.153279	652	34.7548
endocrine gland	dendritic cell	2262	0.0021	female	XIST	1.89835	0.20759	786	34.748
vasculature	leukocyte	30926	0.0412	female	XIST	1.88882	0.203718	10746	34.7475
vasculature	hematopoietic cell	30929	0.0412	female	XIST	1.88882	0.203718	10746	34.7441
small intestine	pericyte	3488	0.0015	female	XIST	1.98102	0.241185	1211	34.719
ovary	leukocyte	3559	0.0196	female	XIST	2.07733	0.280323	1235	34.7008
vasculature	mononuclear cell	30624	0.0408	female	XIST	1.88764	0.20324	10623	34.6885
esophagus	activated CD8-positive, alpha-beta T cell	199	0.0005	female	XIST	2.12532	0.299821	69	34.6734
liver	late pro-B cell	626	0.0002	female	XIST	1.87255	0.197108	217	34.6645
heart	lymphocyte of B lineage	551	0.0001	female	XIST	2.26041	0.354718	191	34.6642
pleural fluid	myeloid cell	1674	0.007	female	XIST	1.79775	0.166713	580	34.6476
lung	mature T cell	168195	0.0181	female	XIST	2.12878	0.301229	58243	34.6283
bone marrow	muscle precursor cell	26	0	female	XIST	1.6863	0.121422	9	34.6154
brain	conventional dendritic cell	272	0	female	XIST	1.76183	0.152114	94	34.5588
small intestine	perivascular cell	3513	0.0015	female	XIST	1.9814	0.241338	1214	34.5574
uterus	epithelial cell of uterus	191	0.0006	female	XIST	1.97056	0.236933	66	34.555
ovary	secretory cell	7576	0.0415	female	XIST	2.09519	0.28758	2617	34.5433
lung	CD4-positive, alpha-beta T cell	87461	0.0094	female	XIST	2.10934	0.293329	30209	34.54
pleural fluid	myeloid leukocyte	1654	0.0069	female	XIST	1.79865	0.167078	571	34.5224
ovary	stromal cell	46150	0.2527	female	XIST	1.9384	0.223865	15932	34.5222
kidney	myofibroblast cell	3785	0.0011	female	XIST	1.85697	0.190775	1303	34.4254
lung	ciliated cell	19107	0.002	female	XIST	1.97208	0.23755	6576	34.4167
lung	lung resident memory CD4-positive, alpha-beta T cell	558	0.0001	female	XIST	2.18419	0.323744	192	34.4086
ovary	hematopoietic cell	3601	0.0197	female	XIST	2.07761	0.280437	1239	34.4071
nose	epithelial cell	89435	0.1134	female	XIST	1.96231	0.23358	30756	34.3892
eye	retinal blood vessel endothelial cell	96	0	female	XIST	1.96537	0.234824	33	34.375
lymph node	glandular epithelial cell	32	0	female	XIST	2.33864	0.386506	11	34.375
nose	ciliated cell	16841	0.0213	female	XIST	1.9846	0.24264	5779	34.3151
hindlimb	professional antigen presenting cell	207	0.0008	female	XIST	1.79047	0.163752	71	34.2995
small intestine	M cell of gut	210	0.0001	female	XIST	1.83256	0.180858	72	34.2857
nose	respiratory goblet cell	46909	0.0593	female	XIST	1.94607	0.226983	16078	34.2749
nose	glandular epithelial cell	47045	0.0594	female	XIST	1.94572	0.226839	16109	34.2417
stomach	myeloid leukocyte	412	0.0016	female	XIST	2.05662	0.271908	141	34.2233
lamina propria	cell	16569	0.2404	female	XIST	2.01157	0.2536	5669	34.2145
lamina propria	leukocyte	16567	0.2403	female	XIST	2.01161	0.253615	5667	34.2066
nose	mucus secreting cell	47070	0.0594	female	XIST	1.94582	0.226882	16101	34.2065
small intestine	brush cell	512	0.0002	female	XIST	2.29691	0.369549	175	34.1797
lung	gamma-delta T cell	480	0.0001	female	XIST	2.09125	0.285977	164	34.1667
esophagogastric junction	mononuclear phagocyte	82	0.0024	female	XIST	2.00301	0.25012	28	34.1463
small intestine	efferent neuron	1693	0.0007	female	XIST	2.04865	0.268668	578	34.1406
blood	dendritic cell, human	2585	0.0001	female	XIST	1.92554	0.218638	882	34.1199
bone marrow	pro-B cell	10013	0.0063	female	XIST	2.06231	0.274219	3414	34.0957
nose	pulmonary ionocyte	965	0.0012	female	XIST	1.99908	0.248523	329	34.0933
hindlimb	mononuclear cell	317	0.0013	female	XIST	1.79781	0.166737	108	34.0694
esophagus	glandular cell of esophagus	902	0.0021	female	XIST	1.87983	0.200063	307	34.0355
nose	epithelial cell of lung	967	0.0012	female	XIST	1.99908	0.248523	329	34.0228
lung	mononuclear cell	610963	0.0646	female	XIST	2.08377	0.282937	207817	34.0147
lymph node	B cell	29254	0.0248	female	XIST	1.92146	0.216983	9948	34.0056
hindlimb	myeloid leukocyte	253	0.001	female	XIST	1.8253	0.177908	86	33.9921
esophagus	glandular epithelial cell	1336	0.0031	female	XIST	1.89621	0.20672	454	33.982
lamina propria	monocyte	56	0.0008	female	XIST	2.04318	0.266445	19	33.9286
intestine	lymphocyte	699	0.0059	female	XIST	2.52598	0.462636	237	33.9056
nose	respiratory epithelial cell	65543	0.0819	female	XIST	1.96401	0.234274	22219	33.8999
lung	leukocyte	635595	0.0668	female	XIST	2.08465	0.283295	215169	33.8532
lymph node	progenitor cell	1342	0.0011	female	XIST	1.96576	0.234982	454	33.8301
esophagus	B cell	284	0.0006	female	XIST	2.09348	0.286883	96	33.8028
spleen	CD8-alpha alpha positive, gamma-delta intraepithelial T cell	438	0.0005	female	XIST	1.9149	0.214315	148	33.79
lung	alpha-beta T cell	155145	0.0163	female	XIST	2.12264	0.298732	52359	33.7484
esophagogastric junction	glandular epithelial cell	415	0.0118	female	XIST	1.81796	0.174926	140	33.7349
lung	mature alpha-beta T cell	155024	0.0162	female	XIST	2.12217	0.298544	52297	33.7348
scalp	keratinocyte	2583	0.3002	female	XIST	1.92646	0.219015	871	33.7205
nose	ionocyte	1062	0.0013	female	XIST	1.99422	0.246549	358	33.71
spleen	activated CD8-positive, alpha-beta T cell	3265	0.0034	female	XIST	1.9222	0.217281	1100	33.6907
musculature	plasma cell	95	0.0001	female	XIST	2.1154	0.295793	32	33.6842
large intestine	pericyte	389	0.001	female	XIST	1.96047	0.232833	131	33.6761
lung	hematopoietic cell	646076	0.0675	female	XIST	2.08228	0.282331	217453	33.6575
spinal cord	secretory cell	1159	0.0087	female	XIST	2.48297	0.445159	390	33.6497
lung	memory T cell	7028	0.0007	female	XIST	2.0473	0.268118	2364	33.6369
placenta	T cell	8678	0.006	female	XIST	2.10573	0.291861	2912	33.5561
bone marrow	T follicular helper cell	155	0.0001	female	XIST	1.88895	0.203771	52	33.5484
lymph node	lymphocyte of B lineage	30319	0.0253	female	XIST	1.9229	0.217569	10163	33.5202
pleural fluid	classical monocyte	734	0.003	female	XIST	1.82656	0.178417	246	33.515
stomach	mononuclear phagocyte	379	0.0015	female	XIST	2.08318	0.2827	127	33.5092
spinal cord	neuron	1169	0.0088	female	XIST	2.4857	0.446267	391	33.4474
musculature	mature alpha-beta T cell	4689	0.0042	female	XIST	2.02492	0.259023	1567	33.4186
musculature	alpha-beta T cell	4690	0.0042	female	XIST	2.02492	0.259023	1567	33.4115
pleural fluid	monocyte	737	0.003	female	XIST	1.82656	0.178417	246	33.3786
bone marrow	fibroblast	27	0	female	XIST	1.9602	0.232725	9	33.3333
bone marrow	cord blood hematopoietic stem cell	21	0	female	XIST	2.58869	0.48812	7	33.3333
breast	endocrine cell	63	0	female	XIST	1.73682	0.141952	21	33.3333
colon	erythroblast	12	0	female	XIST	1.73125	0.13969	4	33.3333
esophagus	intestine goblet cell	108	0.0002	female	XIST	1.92415	0.218074	36	33.3333
kidney	erythroblast	21	0	female	XIST	2.44278	0.428828	7	33.3333
lung	respiratory hillock cell	102	0	female	XIST	1.97492	0.238704	34	33.3333
lung	fraction A pre-pro B cell	18	0	female	XIST	1.853	0.189161	6	33.3333
lymph node	innate lymphoid cell	2820	0.0023	female	XIST	1.99747	0.247868	940	33.3333
placenta	embryonic fibroblast	93	0.0001	female	XIST	2.26683	0.357326	31	33.3333
small intestine	T follicular helper cell	48	0	female	XIST	1.8963	0.206757	16	33.3333
spleen	mast cell	381	0.0004	female	XIST	1.83477	0.181755	127	33.3333
stomach	smooth muscle cell	15	0.0001	female	XIST	2.30557	0.373071	5	33.3333
kidney	vascular associated smooth muscle cell	2640	0.0008	female	XIST	1.78091	0.159868	879	33.2955
lung	bronchial smooth muscle cell	460	0	female	XIST	1.84584	0.186254	153	33.2609
kidney	smooth muscle cell	2643	0.0008	female	XIST	1.78091	0.159868	879	33.2577
nose	seromucus secreting cell	48892	0.0599	female	XIST	1.94384	0.226078	16253	33.2427
nose	cell	130834	0.1602	female	XIST	1.98451	0.242602	43450	33.21
large intestine	perivascular cell	395	0.001	female	XIST	1.96047	0.232833	131	33.1646
lung	classical monocyte	29104	0.003	female	XIST	2.0339	0.262674	9642	33.1295
scalp	cell	2901	0.3313	female	XIST	1.9002	0.208343	961	33.1265
ovary	B cell	142	0.0007	female	XIST	1.90366	0.209748	47	33.0986
skin of body	hematopoietic multipotent progenitor cell	127	0.0001	female	XIST	1.78202	0.16032	42	33.0709
intestine	mononuclear cell	747	0.0062	female	XIST	2.51528	0.458287	247	33.0656
bone marrow	CD4-positive helper T cell	242	0.0001	female	XIST	1.8543	0.18969	80	33.0579
lymph node	monocyte	1257	0.001	female	XIST	1.95033	0.228714	415	33.0151
lung	mature NK T cell	1775	0.0002	female	XIST	1.89958	0.208091	586	33.0141
small intestine	mononuclear phagocyte	18569	0.0076	female	XIST	1.91928	0.216097	6127	32.9959
brain	lymphocyte of B lineage	2266	0.0001	female	XIST	2.18665	0.324746	747	32.9656
bone marrow	memory B cell	446	0.0003	female	XIST	1.97102	0.237121	147	32.9596
lamina propria	dendritic cell	79	0.0011	female	XIST	1.98649	0.243406	26	32.9114
breast	B cell	13435	0.0019	female	XIST	1.96532	0.234804	4419	32.8917
pleural fluid	hematopoietic cell	8494	0.0335	female	XIST	1.8998	0.208182	2791	32.8585
breast	mature B cell	13224	0.0019	female	XIST	1.96691	0.235452	4342	32.8342
pleural fluid	mononuclear cell	8474	0.0334	female	XIST	1.90032	0.208391	2782	32.8298
nose	respiratory basal cell	19545	0.0237	female	XIST	2.05214	0.270085	6413	32.8115
uterus	contractile cell	11796	0.0346	female	XIST	2.13678	0.304478	3869	32.7993
pancreas	neural cell	430	0.0008	female	XIST	2.60893	0.496343	141	32.7907
skin of body	macrophage	29870	0.0136	female	XIST	1.98008	0.240805	9777	32.7318
lung	ciliated columnar cell of tracheobronchial tree	7040	0.0007	female	XIST	1.99903	0.248504	2304	32.7273
lymph node	natural killer cell	1424	0.0012	female	XIST	1.92428	0.218126	466	32.7247
small intestine	regulatory T cell	2775	0.0011	female	XIST	2.04871	0.26869	908	32.7207
lamina propria	T cell	13439	0.1864	female	XIST	1.99557	0.247099	4396	32.7108
colon	endothelial cell of artery	104	0.0001	female	XIST	2.03917	0.264816	34	32.6923
intestine	leukocyte	762	0.0062	female	XIST	2.51105	0.45657	249	32.6772
lung	CD8-positive, alpha-beta T cell	65493	0.0066	female	XIST	2.14573	0.308116	21401	32.6768
uterus	smooth muscle cell	11701	0.0342	female	XIST	2.13975	0.305688	3821	32.6553
scalp	hair follicular keratinocyte	2045	0.2299	female	XIST	1.92273	0.217497	667	32.6161
lymph node	precursor cell	1455	0.0012	female	XIST	1.98663	0.243464	474	32.5773
pancreas	smooth muscle cell	569	0.001	female	XIST	2.7645	0.55956	185	32.5132
bone marrow	megakaryocyte progenitor cell	1278	0.0008	female	XIST	1.83479	0.181761	415	32.4726
spleen	myeloid dendritic cell	77	0.0001	female	XIST	1.8191	0.175387	25	32.4675
stomach	myeloid cell	462	0.0017	female	XIST	2.07707	0.280215	150	32.4675
vasculature	blood vessel smooth muscle cell	15137	0.0189	female	XIST	1.78597	0.161923	4914	32.4635
lymph node	endo-epithelial cell	37	0	female	XIST	2.30693	0.373622	12	32.4324
breast	fibroblast of mammary gland	266080	0.0368	female	XIST	2.04403	0.266788	86268	32.4218
liver	progenitor cell	35582	0.01	female	XIST	2.11982	0.297586	11536	32.4209
nose	elicited macrophage	105	0.0001	female	XIST	1.89237	0.205162	34	32.381
fallopian tube	mature NK T cell	10250	0.0152	female	XIST	1.90969	0.212199	3319	32.3805
lymph node	CD141-positive myeloid dendritic cell	68	0.0001	female	XIST	1.71756	0.134124	22	32.3529
fallopian tube	T cell	10264	0.0152	female	XIST	1.90969	0.212199	3319	32.3363
large intestine	CD4-positive, alpha-beta T cell	96	0.0002	female	XIST	1.99638	0.247426	31	32.2917
eye	precursor cell	7598	0.0007	female	XIST	2.30984	0.374803	2451	32.2585
liver	double-positive, alpha-beta thymocyte	31	0	female	XIST	1.82494	0.17776	10	32.2581
bone marrow	myeloid cell	109071	0.0651	female	XIST	2.00963	0.25281	35175	32.2496
nose	tracheobronchial goblet cell	28261	0.0336	female	XIST	1.92693	0.219205	9101	32.2034
nose	tracheal goblet cell	28257	0.0336	female	XIST	1.92691	0.219198	9099	32.2009
lamina propria	mononuclear cell	15091	0.2059	female	XIST	2.02215	0.257897	4856	32.1781
lymph node	stem cell	143	0.0001	female	XIST	2.37519	0.40136	46	32.1678
lung	enucleate erythrocyte	112	0	female	XIST	2.74331	0.550948	36	32.1429
fallopian tube	plasma cell	1089	0.0016	female	XIST	1.86984	0.196007	349	32.0478
ovary	smooth muscle cell	768	0.0039	female	XIST	1.99768	0.247955	246	32.0312
lamina propria	alpha-beta T cell	12102	0.1644	female	XIST	2.00188	0.249661	3876	32.0278
bone marrow	mast cell	534	0.0003	female	XIST	1.86893	0.195636	171	32.0225
large intestine	conventional dendritic cell	75	0.0002	female	XIST	2.05179	0.269944	24	32
saliva	B cell	50	0.0011	female	XIST	1.88036	0.200279	16	32
blood	intermediate monocyte	1310	0	female	XIST	1.97547	0.238931	418	31.9084
hindlimb	mononuclear phagocyte	270	0.001	female	XIST	1.8114	0.172257	86	31.8519
uterus	ciliated cell	3220	0.0092	female	XIST	1.85067	0.188218	1025	31.8323
nose	multi-ciliated epithelial cell	4900	0.0057	female	XIST	1.93783	0.223633	1559	31.8163
pleural fluid	CD4-positive, alpha-beta T cell	1532	0.0059	female	XIST	1.82416	0.177441	487	31.7885
lamina propria	memory T cell	7156	0.0964	female	XIST	1.92941	0.220214	2273	31.7636
exocrine gland	pericyte	296	0.0009	female	XIST	2.16683	0.316689	94	31.7568
large intestine	myeloid leukocyte	189	0.0004	female	XIST	2.0092	0.252635	60	31.746
lymph node	fibroblast of lung	63	0	female	XIST	1.95676	0.231327	20	31.746
lamina propria	CD8-positive, alpha-beta memory T cell	7132	0.096	female	XIST	1.93017	0.22052	2264	31.7443
lamina propria	CD8-positive, alpha-beta T cell	7135	0.096	female	XIST	1.93017	0.22052	2264	31.7309
neck	T cell	1006	0.0252	female	XIST	1.87204	0.196901	319	31.7097
mucosa	melanocyte	101	0.0003	female	XIST	1.84833	0.187266	32	31.6832
stomach	macrophage	161	0.0006	female	XIST	2.1005	0.289738	51	31.677
lung	multi-ciliated epithelial cell	9900	0.001	female	XIST	2.00106	0.249327	3134	31.6566
liver	myeloid cell	151184	0.0415	female	XIST	2.16987	0.317927	47837	31.6416
stomach	stromal cell	642	0.0024	female	XIST	2.62379	0.502383	203	31.6199
blood	immature B cell	3321	0.0001	female	XIST	2.07327	0.278673	1050	31.617
lamina propria	lymphocyte	14574	0.1954	female	XIST	2.01254	0.253995	4607	31.6111
nose	CD4-positive, alpha-beta memory T cell	307	0.0004	female	XIST	2.02811	0.260319	97	31.5961
exocrine gland	acinar cell of salivary gland	13504	0.0427	female	XIST	2.12462	0.299537	4264	31.5758
eye	basal cell	7137	0.0006	female	XIST	2.33572	0.385319	2253	31.5679
breast	progenitor cell of mammary luminal epithelium	13702	0.0018	female	XIST	1.78014	0.159557	4325	31.5647
eye	stem cell	7203	0.0006	female	XIST	2.33596	0.38542	2272	31.5424
exocrine gland	salivary gland glandular cell	14068	0.0444	female	XIST	2.11756	0.296668	4437	31.5397
colon	intestine goblet cell	2265	0.0016	female	XIST	1.84696	0.18671	714	31.5232
breast	progenitor cell	329489	0.0443	female	XIST	1.81624	0.174226	103844	31.5167
small intestine	connective tissue cell	72039	0.0282	female	XIST	1.99248	0.245842	22703	31.5149
small intestine	naive thymus-derived CD4-positive, alpha-beta T cell	308	0.0001	female	XIST	1.87463	0.197951	97	31.4935
colon	enterocyte of colon	575	0.0004	female	XIST	1.77804	0.158701	181	31.4783
esophagogastric junction	professional antigen presenting cell	105	0.0028	female	XIST	2.07741	0.280354	33	31.4286
large intestine	efferent neuron	245	0.0006	female	XIST	1.99603	0.247286	77	31.4286
vasculature	B cell	490	0.0006	female	XIST	1.81542	0.173891	154	31.4286
small intestine	CD8-positive, alpha-beta memory T cell	10994	0.0043	female	XIST	1.91793	0.215546	3455	31.4262
small intestine	cell	344255	0.1343	female	XIST	2.0011	0.249346	108159	31.4183
pleural fluid	lymphocyte	6554	0.0247	female	XIST	1.92602	0.218836	2059	31.4159
lung	mesenchymal stem cell	1382	0.0001	female	XIST	2.67624	0.523697	434	31.4038
esophagogastric junction	T cell	86	0.0023	female	XIST	2.18023	0.322138	27	31.3953
stomach	connective tissue cell	1763	0.0064	female	XIST	2.25325	0.35181	553	31.367
liver	conventional dendritic cell	507	0.0001	female	XIST	1.90904	0.211934	159	31.3609
small intestine	memory T cell	11085	0.0043	female	XIST	1.91862	0.21583	3476	31.3577
large intestine	neuron	252	0.0006	female	XIST	1.99103	0.245251	79	31.3492
spleen	natural killer cell	20966	0.0204	female	XIST	1.95033	0.228713	6567	31.3221
stomach	fibroblast	1013	0.0037	female	XIST	1.97619	0.239224	317	31.2932
lamina propria	T follicular helper cell	16	0.0002	female	XIST	2.2853	0.364832	5	31.25
large intestine	CD8-positive, alpha-beta memory T cell	48	0.0001	female	XIST	1.97556	0.238964	15	31.25
liver	naive B cell	64	0	female	XIST	1.85279	0.189078	20	31.25
ovary	macrophage	32	0.0002	female	XIST	2.50616	0.454583	10	31.25
spleen	memory B cell	8812	0.0085	female	XIST	1.95947	0.232427	2749	31.1961
pleural fluid	mature T cell	3330	0.0125	female	XIST	1.85943	0.191776	1038	31.1712
skin of body	plasma cell	77	0	female	XIST	1.98537	0.242952	24	31.1688
lung	myeloid dendritic cell	11194	0.0011	female	XIST	1.89647	0.206829	3486	31.1417
spleen	innate lymphoid cell	22293	0.0216	female	XIST	1.95006	0.228603	6942	31.1398
adrenal gland	erythroid lineage cell	106	0.0002	female	XIST	2.75701	0.556515	33	31.1321
vasculature	natural killer cell	582	0.0007	female	XIST	1.85664	0.190643	181	31.0997
lung	CD1c-positive myeloid dendritic cell	11144	0.0011	female	XIST	1.89805	0.20747	3465	31.093
spleen	T follicular helper cell	3732	0.0036	female	XIST	1.90215	0.209136	1159	31.0557
breast	luminal adaptive secretory precursor cell of mammary gland	308347	0.0408	female	XIST	1.81033	0.171822	95707	31.0387
endocrine gland	group 3 innate lymphoid cell	490	0.0004	female	XIST	1.93509	0.22252	152	31.0204
bone marrow	early lymphoid progenitor	1065	0.0006	female	XIST	1.77703	0.158291	330	30.9859
lung	ciliated epithelial cell	11166	0.0011	female	XIST	2.00375	0.25042	3457	30.9601
stomach	lymphocyte of B lineage	1347	0.0049	female	XIST	2.07236	0.2783	417	30.9577
blood	mast cell	42	0	female	XIST	2.05464	0.271099	13	30.9524
liver	alpha-beta T cell	18842	0.0051	female	XIST	2.13673	0.30446	5827	30.9256
kidney	progenitor cell	8485	0.0023	female	XIST	1.91354	0.213763	2624	30.9252
exocrine gland	progenitor cell	401	0.0012	female	XIST	2.31529	0.377019	124	30.9227
skin of body	granular cell of epidermis	207	0.0001	female	XIST	1.69656	0.125593	64	30.9179
bone marrow	secretory cell	563	0.0003	female	XIST	1.86323	0.193318	174	30.9059
skin of body	basal cell of epidermis	16064	0.0069	female	XIST	1.70514	0.129077	4964	30.9014
liver	mature alpha-beta T cell	18731	0.005	female	XIST	2.13324	0.303041	5783	30.874
vasculature	innate lymphoid cell	590	0.0007	female	XIST	1.85493	0.189947	182	30.8475
skin of body	basal cell	16102	0.0069	female	XIST	1.70514	0.129077	4964	30.8285
pleural fluid	mature alpha-beta T cell	3153	0.0117	female	XIST	1.86032	0.192139	972	30.8278
liver	mature T cell	18883	0.0051	female	XIST	2.13142	0.302301	5821	30.8267
lung	myeloid leukocyte	289153	0.0277	female	XIST	2.02199	0.257834	89099	30.8138
milk	mononuclear cell	7595	0.0492	female	XIST	1.95142	0.229158	2339	30.7966
bone marrow	connective tissue cell	1234	0.0007	female	XIST	1.94388	0.226094	380	30.7942
lung	mononuclear phagocyte	278919	0.0267	female	XIST	2.01485	0.254933	85831	30.7727
hindlimb	melanocyte	26	0.0001	female	XIST	1.64083	0.102947	8	30.7692
large intestine	oligodendrocyte precursor cell	26	0.0001	female	XIST	2.83143	0.58676	8	30.7692
vasculature	non-classical monocyte	13	0	female	XIST	1.49928	0.0454239	4	30.7692
kidney	monocyte	8194	0.0022	female	XIST	1.90951	0.212125	2520	30.7542
kidney	granulocyte	215	0.0001	female	XIST	2.17859	0.321468	66	30.6977
esophagus	memory B cell	62	0.0001	female	XIST	2.22781	0.34147	19	30.6452
spleen	secretory cell	434	0.0004	female	XIST	1.83892	0.18344	133	30.6452
esophagus	natural T-regulatory cell	111	0.0002	female	XIST	2.08991	0.285432	34	30.6306
spleen	myofibroblast cell	209	0.0002	female	XIST	1.71801	0.134309	64	30.622
lamina propria	mature alpha-beta T cell	11556	0.15	female	XIST	1.93024	0.220549	3538	30.6161
endocrine gland	precursor B cell	170	0.0001	female	XIST	1.84804	0.187146	52	30.5882
lamina propria	mature T cell	11615	0.1506	female	XIST	1.92994	0.220429	3551	30.5725
small intestine	GIP cell	36	0	female	XIST	1.87721	0.198999	11	30.5556
stomach	mesenchymal stem cell	108	0.0004	female	XIST	2.63531	0.507062	33	30.5556
skin of body	stem cell	16423	0.007	female	XIST	1.71266	0.132133	5015	30.5364
lung	myeloid cell	299283	0.0284	female	XIST	2.01788	0.256162	91327	30.5153
spleen	CD4-positive helper T cell	3906	0.0037	female	XIST	1.90169	0.208949	1191	30.4916
vasculature	contractile cell	24876	0.0291	female	XIST	1.78232	0.160442	7585	30.4912
lamina propria	CD16-negative, CD56-bright natural killer cell, human	69	0.0009	female	XIST	2.03219	0.26198	21	30.4348
vasculature	smooth muscle cell	24488	0.0285	female	XIST	1.77909	0.15913	7428	30.3332
large intestine	type L enteroendocrine cell	33	0.0001	female	XIST	1.91177	0.213044	10	30.303
skin of body	hematopoietic stem cell	33	0	female	XIST	1.62953	0.0983533	10	30.303
kidney	myeloid cell	22871	0.0061	female	XIST	2.04626	0.267695	6927	30.2873
spleen	CD4-positive, CD25-positive, alpha-beta regulatory T cell	667	0.0006	female	XIST	1.87712	0.198965	202	30.2849
endocrine gland	myofibroblast cell	172	0.0001	female	XIST	1.67887	0.118403	52	30.2326
esophagus	CD8-positive, alpha-beta cytotoxic T cell	43	0.0001	female	XIST	2.06044	0.273456	13	30.2326
kidney	myeloid leukocyte	22295	0.0059	female	XIST	2.03038	0.261243	6734	30.2041
kidney	neutrophil	202	0.0001	female	XIST	2.18817	0.325362	61	30.198
pleural fluid	T cell	5403	0.0196	female	XIST	1.94806	0.227791	1630	30.1684
intestine	smooth muscle cell	123	0.0009	female	XIST	2.73117	0.546018	37	30.0813
esophagus	CD8-positive, alpha-beta T cell	406	0.0008	female	XIST	2.11414	0.295278	122	30.0493
pleural fluid	macrophage	406	0.0015	female	XIST	1.84309	0.185137	122	30.0493
small intestine	glandular epithelial cell	11939	0.0045	female	XIST	2.0702	0.277426	3586	30.036
nose	ciliated columnar cell of tracheobronchial tree	2019	0.0022	female	XIST	2.05592	0.271623	606	30.0149
adrenal gland	Schwann cell	80	0.0002	female	XIST	2.79772	0.573058	24	30
endocrine gland	granulocyte	20	0	female	XIST	1.80442	0.169422	6	30
kidney	blood cell	220	0.0001	female	XIST	2.17859	0.321468	66	30
large intestine	mast cell	40	0.0001	female	XIST	1.6944	0.124712	12	30
lymph node	non-classical monocyte	40	0	female	XIST	2.07833	0.280728	12	30
uterus	B cell	10	0	female	XIST	1.62453	0.0963205	3	30
yolk sac	plasmacytoid dendritic cell	10	0.0001	female	XIST	1.69686	0.125714	3	30
vasculature	perivascular cell	22567	0.026	female	XIST	1.7719	0.156207	6768	29.9907
lung	CD8-positive, alpha-beta memory T cell	3907	0.0004	female	XIST	2.1526	0.31091	1170	29.9463
small intestine	T cell	60212	0.0224	female	XIST	2.0243	0.258772	18021	29.9292
esophagus	mucus secreting cell	421	0.0008	female	XIST	1.84029	0.183996	126	29.9287
pleural fluid	CD8-positive, alpha-beta T cell	1621	0.0058	female	XIST	1.89664	0.206897	485	29.9198
neck	mononuclear cell	2089	0.0494	female	XIST	1.87945	0.199911	625	29.9186
skin of body	granulocyte	214	0.0001	female	XIST	1.87517	0.198172	64	29.9065
stomach	secretory cell	8157	0.0284	female	XIST	2.01083	0.253298	2439	29.9007
small intestine	epithelial cell	77121	0.0286	female	XIST	2.02044	0.257202	23034	29.8674
spleen	follicular B cell	11650	0.0108	female	XIST	1.81095	0.172074	3478	29.8541
brain	regulatory T cell	315	0	female	XIST	1.90628	0.210815	94	29.8413
kidney	phagocyte	32654	0.0086	female	XIST	2.02909	0.260719	9744	29.8401
lymph node	memory B cell	10066	0.0075	female	XIST	1.89457	0.206055	3003	29.8331
kidney	mononuclear phagocyte	32617	0.0086	female	XIST	2.02937	0.260831	9730	29.8311
vasculature	vascular associated smooth muscle cell	22179	0.0254	female	XIST	1.76803	0.154632	6611	29.8075
colon	brush cell	765	0.0005	female	XIST	2.14454	0.307633	228	29.8039
vasculature	lymphocyte of B lineage	537	0.0006	female	XIST	1.83017	0.179886	160	29.7952
small intestine	glial cell	5132	0.0019	female	XIST	2.02606	0.259486	1529	29.7935
small intestine	stromal cell	51742	0.0191	female	XIST	1.94615	0.227017	15411	29.7843
placenta	chorionic trophoblast cell	37	0	female	XIST	2.39215	0.408252	11	29.7297
stomach	glandular epithelial cell	7941	0.0275	female	XIST	2.00991	0.252923	2358	29.694
small intestine	myofibroblast cell	4927	0.0018	female	XIST	1.95915	0.232298	1463	29.6935
large intestine	activated CD4-positive, alpha-beta T cell	64	0.0001	female	XIST	1.94074	0.224816	19	29.6875
liver	hepatic pit cell	4979	0.0013	female	XIST	2.10761	0.292627	1478	29.6847
liver	dendritic cell	7684	0.002	female	XIST	1.8746	0.19794	2278	29.646
lymph node	dendritic cell	1199	0.0009	female	XIST	1.88233	0.201079	355	29.608
lung	dendritic cell	25598	0.0024	female	XIST	1.96855	0.236119	7574	29.5882
blood	conventional dendritic cell	35780	0.0011	female	XIST	1.80641	0.170232	10579	29.5668
lamina propria	mature B cell	44	0.0006	female	XIST	2.08123	0.281905	13	29.5455
blood	hematopoietic stem cell	2121	0.0001	female	XIST	1.98039	0.240928	626	29.5144
colon	squamous epithelial cell	224	0.0001	female	XIST	2.05052	0.269425	66	29.4643
esophagus	mucous neck cell	265	0.0005	female	XIST	1.84275	0.184998	78	29.434
esophagogastric junction	leukocyte	279	0.0069	female	XIST	2.07368	0.278837	82	29.3907
pancreas	connective tissue cell	3987	0.0066	female	XIST	2.49111	0.448463	1171	29.3705
large intestine	transit amplifying cell of colon	412	0.0009	female	XIST	1.68308	0.120114	121	29.3689
kidney	macrophage	13480	0.0035	female	XIST	2.09264	0.286544	3956	29.3472
esophagogastric junction	hematopoietic cell	280	0.0069	female	XIST	2.07368	0.278837	82	29.2857
small intestine	contractile cell	10443	0.0038	female	XIST	1.95777	0.231738	3058	29.2828
bladder organ	stromal cell	41	0.0005	female	XIST	2.53407	0.465922	12	29.2683
brain	fibroblast of lung	106	0	female	XIST	1.80312	0.168894	31	29.2453
esophagus	lymphocyte	1509	0.003	female	XIST	2.0838	0.282951	441	29.2247
ovary	natural killer cell	408	0.0019	female	XIST	2.01519	0.255069	119	29.1667
small intestine	myeloid leukocyte	12667	0.0046	female	XIST	1.97122	0.237202	3687	29.1071
brain	B cell	1403	0	female	XIST	2.08325	0.282725	408	29.0805
fallopian tube	secretory cell	26399	0.035	female	XIST	1.90423	0.209982	7672	29.0617
lamina propria	natural killer cell	117	0.0014	female	XIST	2.03368	0.262583	34	29.0598
mucosa	mast cell	1324	0.0036	female	XIST	2.1467	0.308512	384	29.003
lamina propria	CD4-positive helper T cell	4286	0.0527	female	XIST	1.92845	0.219822	1242	28.9781
liver	immature B cell	711	0.0002	female	XIST	1.82405	0.177398	206	28.9733
adrenal gland	T cell	8872	0.0185	female	XIST	1.87744	0.199095	2570	28.9675
lamina propria	CD4-positive, alpha-beta T cell	4379	0.0538	female	XIST	1.92945	0.22023	1268	28.9564
heart	erythroid lineage cell	38	0	female	XIST	2.11041	0.293766	11	28.9474
lung	tracheobronchial smooth muscle cell	1928	0.0002	female	XIST	2.15929	0.313626	558	28.9419
small intestine	leukocyte	120435	0.0432	female	XIST	1.98114	0.241234	34827	28.9177
small intestine	secretory cell	13401	0.0048	female	XIST	2.07192	0.278124	3874	28.9083
esophagus	T cell	924	0.0018	female	XIST	2.12222	0.298563	267	28.8961
stomach	intestine goblet cell	45	0.0002	female	XIST	2.04381	0.266701	13	28.8889
nose	CD16-positive, CD56-dim natural killer cell, human	52	0.0001	female	XIST	1.80784	0.17081	15	28.8462
large intestine	stromal cell	23443	0.0506	female	XIST	1.95677	0.231331	6758	28.8274
blood	dendritic cell	60796	0.0018	female	XIST	1.86361	0.193475	17525	28.8259
small intestine	hematopoietic cell	121369	0.0434	female	XIST	1.98099	0.241173	34934	28.7833
lymph node	T follicular helper cell	4897	0.0035	female	XIST	1.90536	0.210439	1409	28.7727
large intestine	connective tissue cell	24313	0.0523	female	XIST	1.95527	0.230723	6984	28.7254
pancreas	mesenchymal stem cell	188	0.0003	female	XIST	2.61341	0.498163	54	28.7234
large intestine	myeloid cell	216	0.0005	female	XIST	1.99677	0.247587	62	28.7037
lymph node	endothelial cell	143	0.0001	female	XIST	2.21803	0.337495	41	28.6713
large intestine	cell	57310	0.1229	female	XIST	1.90512	0.210343	16413	28.639
adrenal gland	fibroblast	175	0.0004	female	XIST	1.99059	0.245073	50	28.5714
lamina propria	innate lymphoid cell	168	0.002	female	XIST	2.01303	0.254194	48	28.5714
large intestine	endothelial cell of artery	35	0.0001	female	XIST	2.2761	0.361096	10	28.5714
liver	capillary endothelial cell	14	0	female	XIST	2.1866	0.324725	4	28.5714
skin of body	promyelocyte	35	0	female	XIST	1.72438	0.136896	10	28.5714
small intestine	colon goblet cell	154	0.0001	female	XIST	1.8695	0.195869	44	28.5714
exocrine gland	secretory cell	16444	0.047	female	XIST	2.11546	0.295815	4696	28.5575
ovary	stromal cell of ovary	27156	0.1229	female	XIST	1.94412	0.226189	7746	28.5241
endocrine gland	innate lymphoid cell	1700	0.0013	female	XIST	1.87265	0.197146	484	28.4706
brain	endocrine cell	116	0	female	XIST	2.32545	0.381146	33	28.4483
blood	progenitor cell	899362	0.0267	female	XIST	1.92973	0.220343	255741	28.4358
stomach	peptic cell	204	0.0007	female	XIST	1.74449	0.145068	58	28.4314
blood	precursor cell	899515	0.0267	female	XIST	1.92973	0.220343	255743	28.4312
small intestine	endo-epithelial cell	53534	0.0189	female	XIST	1.97893	0.240337	15200	28.3932
small intestine	mononuclear cell	115160	0.0406	female	XIST	1.9871	0.243655	32697	28.3927
colon	stromal cell	7870	0.0051	female	XIST	1.89395	0.205804	2234	28.3863
lymph node	CD4-positive helper T cell	5414	0.0038	female	XIST	1.90439	0.210047	1535	28.3524
kidney	kidney connecting tubule principal cell	60	0	female	XIST	1.66293	0.111925	17	28.3333
spleen	conventional dendritic cell	484	0.0004	female	XIST	1.88599	0.202569	137	28.3058
scalp	sebum secreting cell	318	0.031	female	XIST	1.64606	0.105069	90	28.3019
lymph node	myeloid dendritic cell	417	0.0003	female	XIST	1.77731	0.158407	118	28.2974
lung	malignant cell	16095	0.0014	female	XIST	2.08636	0.283993	4554	28.2945
lamina propria	classical monocyte	46	0.0006	female	XIST	2.08252	0.282431	13	28.2609
milk	leukocyte	8371	0.0498	female	XIST	1.95064	0.228841	2364	28.2404
esophagogastric junction	activated CD8-positive, alpha-beta T cell	39	0.0009	female	XIST	2.33512	0.385078	11	28.2051
skin of body	eurydendroid cell	1076	0.0004	female	XIST	1.79339	0.164939	303	28.1599
fallopian tube	fibroblast	8633	0.0111	female	XIST	1.89126	0.204711	2431	28.1594
kidney	pro-B cell	32	0	female	XIST	1.70654	0.129646	9	28.125
skin of body	CD8-alpha-alpha-positive, alpha-beta intraepithelial T cell	32	0	female	XIST	1.68181	0.119598	9	28.125
large intestine	mature alpha-beta T cell	338	0.0007	female	XIST	1.89814	0.207505	95	28.1065
spleen	alpha-beta T cell	36853	0.0322	female	XIST	1.90705	0.211125	10358	28.1063
endocrine gland	secretory cell	4277	0.0032	female	XIST	2.39935	0.411176	1202	28.1038
small intestine	intestinal epithelial cell	51630	0.018	female	XIST	1.97378	0.238242	14507	28.098
adrenal gland	lymphocyte	10051	0.0203	female	XIST	1.88496	0.202149	2822	28.0768
ovary	precursor cell	57	0.0003	female	XIST	2.51362	0.457611	16	28.0702
lung	mesothelial cell	1288	0.0001	female	XIST	1.85534	0.190113	361	28.028
lung	nasal mucosa goblet cell	289	0	female	XIST	2.05165	0.269885	81	28.0277
large intestine	intestine goblet cell	1632	0.0034	female	XIST	1.92956	0.220275	457	28.0025
kidney	unswitched memory B cell	25	0	female	XIST	2.01207	0.253804	7	28
large intestine	mature T cell	361	0.0008	female	XIST	1.88582	0.202501	101	27.9778
spleen	mature alpha-beta T cell	36522	0.0317	female	XIST	1.89565	0.206495	10214	27.9667
esophagus	epithelial cell of stratum germinativum of esophagus	648	0.0012	female	XIST	1.81971	0.175634	181	27.9321
small intestine	myeloid cell	13454	0.0047	female	XIST	1.969	0.236298	3755	27.9099
spinal cord	GABAergic neuron	958	0.006	female	XIST	2.37827	0.402612	267	27.8706
breast	naive thymus-derived CD4-positive, alpha-beta T cell	6491	0.0008	female	XIST	1.9483	0.227889	1808	27.854
pancreas	pancreatic ductal cell	14412	0.0228	female	XIST	2.08122	0.281901	4014	27.8518
lymph node	lymphocyte	87089	0.0603	female	XIST	1.91702	0.215179	24252	27.8474
pancreas	stem cell	194	0.0003	female	XIST	2.61341	0.498163	54	27.8351
fallopian tube	blood vessel endothelial cell	4570	0.0058	female	XIST	1.86837	0.195408	1272	27.8337
bone marrow	granulocytopoietic cell	3891	0.002	female	XIST	2.00312	0.250166	1083	27.8335
lung	erythrocyte	133	0	female	XIST	2.71022	0.537501	37	27.8195
small intestine	goblet cell	7464	0.0026	female	XIST	2.08993	0.285444	2076	27.8135
small intestine	mucus secreting cell	7468	0.0026	female	XIST	2.08968	0.28534	2077	27.812
spleen	monocyte	6693	0.0058	female	XIST	1.89352	0.20563	1859	27.7753
milk	mononuclear phagocyte	6758	0.0394	female	XIST	1.88872	0.203677	1872	27.7005
milk	professional antigen presenting cell	6758	0.0394	female	XIST	1.88872	0.203677	1872	27.7005
lymph node	mononuclear cell	92276	0.0636	female	XIST	1.91655	0.214987	25553	27.6919
spleen	mature T cell	39151	0.0336	female	XIST	1.8951	0.206269	10838	27.6826
nose	memory T cell	1720	0.0018	female	XIST	2.01617	0.25547	476	27.6744
colon	T follicular helper cell	47	0	female	XIST	1.85444	0.189749	13	27.6596
lymph node	leukocyte	92865	0.0639	female	XIST	1.91685	0.215109	25670	27.6423
lymph node	hematopoietic cell	93198	0.0641	female	XIST	1.91689	0.215126	25756	27.6358
endocrine gland	natural killer cell	1198	0.0009	female	XIST	1.84331	0.185224	331	27.6294
spleen	intraepithelial lymphocyte	590	0.0005	female	XIST	1.88845	0.20357	163	27.6271
blood	stem cell	2274	0.0001	female	XIST	1.9803	0.240893	628	27.6165
small intestine	enterocyte of colon	11411	0.0039	female	XIST	2.05834	0.272603	3151	27.6137
pancreas	pancreatic A cell	14190	0.0222	female	XIST	1.7548	0.149259	3918	27.611
esophagus	precursor cell	1239	0.0023	female	XIST	1.79737	0.166557	342	27.6029
small intestine	colon epithelial cell	11681	0.004	female	XIST	2.0537	0.270721	3224	27.6004
placenta	conventional dendritic cell	348	0.0002	female	XIST	1.90336	0.209629	96	27.5862
spleen	progenitor cell	8002	0.0068	female	XIST	1.8781	0.199363	2205	27.5556
pancreas	macrophage	323	0.0005	female	XIST	2.62226	0.501759	89	27.5542
large intestine	dendritic cell	98	0.0002	female	XIST	2.05391	0.270806	27	27.551
skin of body	late pro-B cell	98	0	female	XIST	1.79111	0.164011	27	27.551
[truncated: 5,255 more rows]

## Sheet: Supplemental Table S4
Supplemental Table S4: All TFs predicted by JASPAR to bind to the region ChrX:73,841,364-73,841,611 (hg38)
#"chrom"	chromStart	chromEnd	name	score	strand	TFName
chrX	73841351	73841364	MA0046.3	373	+	HNF1A
chrX	73841351	73841364	MA0153.2	366	-	HNF1B
chrX	73841351	73841366	MA0897.2	389	-	Hmx2
chrX	73841352	73841364	MA0853.2	328	-	Alx4
chrX	73841355	73841364	MA0899.2	285	-	HOXA10
chrX	73841355	73841364	MA0913.3	310	-	HOXD9
chrX	73841356	73841364	MA0158.2	217	-	HOXA5
chrX	73841356	73841364	MA0465.3	294	-	CDX2
chrX	73841356	73841364	MA0885.3	305	-	Dlx2
chrX	73841356	73841364	MA1476.3	304	-	Dlx5
chrX	73841356	73841364	MA1530.2	336	-	NKX6-3
chrX	73841356	73841365	MA0629.2	309	-	Rhox11
chrX	73841356	73841365	MA0724.1	320	-	VENTX
chrX	73841356	73841365	MA0896.2	416	-	Hmx1
chrX	73841356	73841365	MA0898.2	402	-	Hmx3
chrX	73841357	73841364	MA0618.2	272	+	LBX1
chrX	73841357	73841364	MA0642.3	291	-	EN2
chrX	73841357	73841364	MA0644.3	221	-	ESX1
chrX	73841357	73841364	MA0661.2	214	-	MEOX1
chrX	73841357	73841364	MA0706.2	213	-	MEOX2
chrX	73841357	73841364	MA0889.2	247	-	GBX1
chrX	73841357	73841364	MA0893.3	225	-	GSX2
chrX	73841357	73841364	MA0910.3	240	-	HOXD8
chrX	73841357	73841364	MA1496.2	191	-	HOXA4
chrX	73841357	73841364	MA1497.2	310	-	HOXA6
chrX	73841357	73841364	MA1500.2	265	+	HOXB6
chrX	73841357	73841364	MA1501.2	238	-	HOXB7
chrX	73841357	73841364	MA1502.2	237	-	HOXB8
chrX	73841357	73841364	MA1519.2	234	-	LHX5
chrX	73841357	73841364	MA2093.1	201	-	HOXB1
chrX	73841357	73841364	MA2339.1	281	-	Nanog
chrX	73841357	73841366	MA1471.2	293	-	BARX2
chrX	73841358	73841369	MA1479.2	305	+	DMRTC2
chrX	73841359	73841365	MA0719.2	212	+	RHOXF1
chrX	73841359	73841366	MA0893.3	177	+	GSX2
chrX	73841360	73841367	MA0893.3	210	-	GSX2
chrX	73841360	73841367	MA0895.2	225	+	HMBOX1
chrX	73841360	73841368	MA1554.2	273	-	RFX7
chrX	73841361	73841367	MA0719.2	171	-	RHOXF1
chrX	73841362	73841368	MA1478.2	231	+	DMRTA2
chrX	73841364	73841370	MA0615.2	203	+	Gmeb1
chrX	73841364	73841370	MA0615.2	203	-	Gmeb1
chrX	73841364	73841373	MA1603.2	348	+	Dmrt1
chrX	73841365	73841371	MA0442.3	240	+	SOX10
chrX	73841365	73841371	MA2326.1	301	+	IKZF2
chrX	73841366	73841372	MA1536.2	154	-	NR2C2
chrX	73841366	73841374	MA0068.2	274	+	PAX4
chrX	73841366	73841374	MA0672.2	243	-	NKX2-3
chrX	73841366	73841374	MA0673.2	260	-	NKX2-8
chrX	73841366	73841374	MA2003.2	241	-	NKX2-4
chrX	73841367	73841374	MA0124.3	261	-	Nkx3-1
chrX	73841368	73841375	MA2336.1	272	+	ZSCAN21
chrX	73841371	73841378	MA2336.1	291	+	ZSCAN21
chrX	73841372	73841379	MA2336.1	391	-	ZSCAN21
chrX	73841373	73841380	MA0124.3	317	+	Nkx3-1
chrX	73841373	73841380	MA0644.3	218	+	ESX1
chrX	73841373	73841380	MA0661.2	228	+	MEOX1
chrX	73841373	73841380	MA0706.2	257	+	MEOX2
chrX	73841373	73841380	MA0889.2	252	+	GBX1
chrX	73841373	73841380	MA0893.3	207	+	GSX2
chrX	73841373	73841380	MA0910.3	226	+	HOXD8
chrX	73841373	73841380	MA1496.2	188	+	HOXA4
chrX	73841373	73841380	MA1497.2	291	+	HOXA6
chrX	73841373	73841380	MA1500.2	298	-	HOXB6
chrX	73841373	73841380	MA1501.2	306	+	HOXB7
chrX	73841373	73841380	MA1502.2	225	+	HOXB8
chrX	73841373	73841380	MA1519.2	257	+	LHX5
chrX	73841373	73841380	MA2093.1	237	+	HOXB1
chrX	73841373	73841380	MA2119.1	243	+	HOXA3
chrX	73841373	73841381	MA0158.2	267	+	HOXA5
chrX	73841373	73841381	MA0158.2	267	-	HOXA5
chrX	73841373	73841381	MA0672.2	235	+	NKX2-3
chrX	73841373	73841381	MA0673.2	254	+	NKX2-8
chrX	73841373	73841381	MA0862.1	253	-	GMEB2
chrX	73841374	73841380	MA0027.3	209	-	EN1
chrX	73841374	73841380	MA0027.3	238	+	EN1
chrX	73841374	73841380	MA0125.2	208	+	Nobox
chrX	73841374	73841380	MA0125.2	253	-	Nobox
chrX	73841374	73841380	MA0132.3	221	-	PDX1
chrX	73841374	73841380	MA0132.3	257	+	PDX1
chrX	73841374	73841380	MA0612.3	225	+	EMX1
chrX	73841374	73841380	MA0612.3	225	-	EMX1
chrX	73841374	73841380	MA0615.2	187	+	Gmeb1
chrX	73841374	73841380	MA0615.2	187	-	Gmeb1
chrX	73841374	73841380	MA0628.2	291	+	POU6F1
chrX	73841374	73841380	MA0628.2	291	-	POU6F1
chrX	73841374	73841380	MA0630.2	225	-	SHOX
chrX	73841374	73841380	MA0634.2	233	+	ALX3
chrX	73841374	73841380	MA0635.2	204	-	BARHL2
chrX	73841374	73841380	MA0654.2	219	-	ISX
chrX	73841374	73841380	MA0654.2	253	+	ISX
chrX	73841374	73841380	MA0662.2	189	-	MIXL1
chrX	73841374	73841380	MA0662.2	225	+	MIXL1
chrX	73841374	73841380	MA0666.3	204	-	MSX1
chrX	73841374	73841380	MA0666.3	249	+	MSX1
chrX	73841374	73841380	MA0675.2	197	+	NKX6-2
chrX	73841374	73841380	MA0699.2	225	-	LBX2
chrX	73841374	73841380	MA0699.2	253	+	LBX2
chrX	73841374	73841380	MA0704.2	189	+	Lhx4
chrX	73841374	73841380	MA0704.2	189	-	Lhx4
chrX	73841374	73841380	MA0705.2	206	+	Lhx8
chrX	73841374	73841380	MA0705.2	206	-	Lhx8
chrX	73841374	73841380	MA0707.3	210	+	MNX1
chrX	73841374	73841380	MA0707.3	210	-	MNX1
chrX	73841374	73841380	MA0708.3	197	-	MSX2
chrX	73841374	73841380	MA0708.3	246	+	MSX2
chrX	73841374	73841380	MA0709.2	225	+	Msx3
chrX	73841374	73841380	MA0716.2	228	+	PRRX1
chrX	73841374	73841380	MA0717.2	227	+	RAX2
chrX	73841374	73841380	MA0718.2	203	-	RAX
chrX	73841374	73841380	MA0718.2	235	+	RAX
chrX	73841374	73841380	MA0720.2	228	+	Shox2
chrX	73841374	73841380	MA0721.2	228	+	UNCX
chrX	73841374	73841380	MA0723.3	219	+	VAX2
chrX	73841374	73841380	MA0875.2	231	+	BARX1
chrX	73841374	73841380	MA0876.2	227	+	BSX
chrX	73841374	73841380	MA0879.3	235	+	DLX1
chrX	73841374	73841380	MA0880.2	243	+	Dlx3
chrX	73841374	73841380	MA0881.2	246	+	Dlx4
chrX	73841374	73841380	MA0882.2	243	+	DLX6
chrX	73841374	73841380	MA0886.2	218	+	EMX2
chrX	73841374	73841380	MA0886.2	218	-	EMX2
chrX	73841374	73841380	MA0887.2	187	+	EVX1
chrX	73841374	73841380	MA0887.2	240	-	EVX1
chrX	73841374	73841380	MA0888.2	197	+	EVX2
chrX	73841374	73841380	MA0888.2	240	-	EVX2
chrX	73841374	73841380	MA0890.2	218	-	GBX2
chrX	73841374	73841380	MA0890.2	233	+	GBX2
chrX	73841374	73841380	MA0892.2	257	+	GSX1
chrX	73841374	73841380	MA0894.2	231	+	HESX1
chrX	73841374	73841380	MA0894.2	240	-	HESX1
chrX	73841374	73841380	MA0900.3	227	+	HOXA2
chrX	73841374	73841380	MA0900.3	227	-	HOXA2
chrX	73841374	73841380	MA0902.3	216	+	HOXB2
chrX	73841374	73841380	MA0902.3	216	-	HOXB2
chrX	73841374	73841380	MA0903.2	238	+	HOXB3
chrX	73841374	73841380	MA0904.3	214	+	HOXB5
chrX	73841374	73841380	MA0904.3	214	-	HOXB5
chrX	73841374	73841380	MA0914.2	301	+	ISL2
chrX	73841374	73841380	MA1481.2	198	+	DRGX
chrX	73841374	73841380	MA1481.2	198	-	DRGX
chrX	73841374	73841380	MA1495.2	195	+	HOXA1
chrX	73841374	73841380	MA1495.2	195	-	HOXA1
chrX	73841374	73841380	MA1498.3	189	+	HOXA7
chrX	73841374	73841380	MA1499.2	202	+	HOXB4
chrX	73841374	73841380	MA1499.2	206	-	HOXB4
chrX	73841374	73841380	MA1504.2	198	+	HOXC4
chrX	73841374	73841380	MA1504.2	198	-	HOXC4
chrX	73841374	73841380	MA1505.2	195	+	HOXC8
chrX	73841374	73841380	MA1505.2	223	-	HOXC8
chrX	73841374	73841380	MA1507.2	203	+	HOXD4
chrX	73841374	73841380	MA1507.2	203	-	HOXD4
chrX	73841374	73841380	MA1577.2	231	+	TLX2
chrX	73841374	73841380	MA1577.2	231	-	TLX2
chrX	73841374	73841381	MA0033.2	259	-	FOXL1
chrX	73841374	73841381	MA0042.2	259	-	FOXI1
chrX	73841374	73841381	MA0661.2	230	-	MEOX1
chrX	73841374	73841381	MA0674.2	272	+	NKX6-1
chrX	73841374	73841381	MA0706.2	215	-	MEOX2
chrX	73841374	73841381	MA0848.1	260	-	FOXO4
chrX	73841374	73841381	MA0850.1	287	-	FOXP3
chrX	73841374	73841381	MA0893.3	207	-	GSX2
chrX	73841374	73841381	MA0895.2	283	+	HMBOX1
chrX	73841374	73841381	MA0910.3	226	-	HOXD8
chrX	73841374	73841381	MA1496.2	224	-	HOXA4
chrX	73841374	73841381	MA1500.2	193	+	HOXB6
chrX	73841374	73841381	MA1501.2	313	-	HOXB7
chrX	73841374	73841381	MA1502.2	225	-	HOXB8
chrX	73841374	73841381	MA1519.2	257	-	LHX5
chrX	73841374	73841381	MA1523.2	264	+	MSANTD3
chrX	73841374	73841381	MA2093.1	242	-	HOXB1
chrX	73841374	73841381	MA2119.1	243	-	HOXA3
chrX	73841374	73841382	MA0047.4	279	-	FOXA2
chrX	73841375	73841383	MA1717.2	336	+	ZNF784
chrX	73841375	73841384	MA0763.2	329	-	ETV3
chrX	73841376	73841382	MA1478.2	193	+	DMRTA2
chrX	73841376	73841386	MA0843.2	276	+	TEF
chrX	73841376	73841386	MA1580.1	436	+	ZBTB32
chrX	73841377	73841384	MA0594.3	204	-	HOXA9
chrX	73841377	73841387	MA1580.1	328	-	ZBTB32
chrX	73841379	73841389	MA0827.1	252	-	OLIG3
chrX	73841379	73841389	MA0827.1	268	+	OLIG3
chrX	73841381	73841394	MA0788.1	335	+	POU3F3
chrX	73841381	73841395	MA0784.3	399	-	POU1F1
chrX	73841382	73841389	MA1152.2	232	+	SOX15
chrX	73841382	73841390	MA1563.2	279	-	SOX18
chrX	73841382	73841392	MA0786.2	312	+	POU3F1
chrX	73841382	73841394	MA0787.1	334	+	POU3F2
chrX	73841382	73841395	MA0507.3	363	+	POU2F2
chrX	73841383	73841389	MA0891.2	221	+	GSC2
chrX	73841383	73841390	MA2333.1	351	+	ZNF35
chrX	73841383	73841392	MA0785.2	352	+	POU2F1
chrX	73841383	73841392	MA0789.1	326	+	POU3F4
chrX	73841383	73841392	MA0792.1	358	+	POU5F1B
chrX	73841384	73841391	MA0619.2	298	-	LIN54
chrX	73841384	73841391	MA1115.2	265	+	POU5F1
chrX	73841385	73841394	MA0144.3	248	-	STAT3
chrX	73841385	73841394	MA0519.2	273	-	Stat5a::Stat5b
chrX	73841385	73841395	MA0520.2	291	-	Stat6
chrX	73841385	73841395	MA0520.2	318	+	Stat6
chrX	73841387	73841394	MA0722.2	240	+	VAX1
chrX	73841387	73841394	MA0850.1	205	+	FOXP3
chrX	73841387	73841395	MA0158.2	222	-	HOXA5
chrX	73841387	73841395	MA0912.2	249	+	HOXD3
chrX	73841388	73841394	MA0635.2	175	+	BARHL2
chrX	73841388	73841394	MA0675.2	201	-	NKX6-2
chrX	73841388	73841394	MA0704.2	210	-	Lhx4
chrX	73841388	73841394	MA0723.3	174	+	VAX2
chrX	73841388	73841394	MA0723.3	233	-	VAX2
chrX	73841388	73841394	MA0876.2	198	-	BSX
chrX	73841388	73841394	MA0892.2	197	-	GSX1
chrX	73841388	73841394	MA0900.3	204	-	HOXA2
chrX	73841388	73841394	MA0902.3	188	-	HOXB2
chrX	73841388	73841394	MA0903.2	203	-	HOXB3
chrX	73841388	73841394	MA1498.3	193	-	HOXA7
chrX	73841388	73841394	MA1499.2	218	-	HOXB4
chrX	73841388	73841394	MA1504.2	214	-	HOXC4
chrX	73841388	73841394	MA1507.2	219	-	HOXD4
chrX	73841388	73841395	MA0710.2	202	-	NOTO
chrX	73841388	73841395	MA0893.3	193	-	GSX2
chrX	73841388	73841395	MA1496.2	174	-	HOXA4
chrX	73841388	73841395	MA1549.2	256	+	POU6F1
chrX	73841388	73841395	MA2119.1	218	-	HOXA3
chrX	73841388	73841396	MA0672.2	244	-	NKX2-3
chrX	73841388	73841396	MA0673.2	230	-	NKX2-8
chrX	73841388	73841396	MA1998.2	291	-	Prdm14
chrX	73841388	73841396	MA2003.2	254	-	NKX2-4
chrX	73841388	73841397	MA0793.2	304	-	POU6F2
chrX	73841389	73841395	MA0914.2	200	-	ISL2
chrX	73841389	73841397	MA1655.2	310	+	ZNF341
chrX	73841391	73841397	MA0719.2	257	+	RHOXF1
chrX	73841392	73841401	MA0002.3	268	-	Runx1
chrX	73841392	73841401	MA0092.2	275	-	Hand1::Tcf3
chrX	73841393	73841398	MA0498.3	180	+	MEIS1
chrX	73841393	73841399	MA0671.2	283	+	NFIX
chrX	73841395	73841401	MA1964.2	233	+	SMAD2
chrX	73841395	73841402	MA1153.2	259	-	Smad4
chrX	73841396	73841405	MA1731.2	343	-	ZNF768
chrX	73841399	73841404	MA0498.3	189	+	MEIS1
chrX	73841399	73841405	MA1684.1	191	+	Foxn1
chrX	73841401	73841409	MA0673.2	237	+	NKX2-8
chrX	73841401	73841409	MA2003.2	251	+	NKX2-4
chrX	73841401	73841412	MA1729.2	403	-	ZNF680
chrX	73841401	73841413	MA2101.1	373	-	ZNF677
chrX	73841401	73841414	MA2120.1	310	-	ZNF184
chrX	73841402	73841410	MA1563.2	205	-	SOX18
chrX	73841403	73841409	MA1684.1	174	-	Foxn1
chrX	73841403	73841411	MA0136.4	291	-	Elf5
chrX	73841403	73841411	MA1125.2	264	-	ZNF384
chrX	73841403	73841413	MA1947.2	294	-	ETV5::FOXO1
chrX	73841404	73841410	MA2326.1	233	-	IKZF2
chrX	73841404	73841412	MA0673.2	203	+	NKX2-8
chrX	73841404	73841413	MA0851.2	308	-	Foxj3
chrX	73841405	73841413	MA0148.5	299	-	FOXA1
chrX	73841405	73841413	MA0613.1	333	-	FOXG1
chrX	73841405	73841413	MA0614.1	309	-	Foxj2
chrX	73841405	73841413	MA1489.1	341	-	FOXN3
chrX	73841405	73841414	MA0144.3	236	-	STAT3
chrX	73841405	73841414	MA0593.2	341	-	FOXP2
chrX	73841406	73841412	MA0635.2	175	-	BARHL2
chrX	73841406	73841412	MA0675.2	201	+	NKX6-2
chrX	73841406	73841412	MA0704.2	210	+	Lhx4
chrX	73841406	73841412	MA0723.3	174	-	VAX2
chrX	73841406	73841412	MA0723.3	233	+	VAX2
chrX	73841406	73841412	MA0876.2	198	+	BSX
chrX	73841406	73841412	MA0892.2	197	+	GSX1
chrX	73841406	73841412	MA0900.3	204	+	HOXA2
chrX	73841406	73841412	MA0902.3	188	+	HOXB2
chrX	73841406	73841412	MA0903.2	203	+	HOXB3
chrX	73841406	73841412	MA1498.3	193	+	HOXA7
chrX	73841406	73841412	MA1499.2	218	+	HOXB4
chrX	73841406	73841412	MA1504.2	214	+	HOXC4
chrX	73841406	73841412	MA1507.2	219	+	HOXD4
chrX	73841406	73841413	MA0031.2	317	-	FOXD1
chrX	73841406	73841413	MA0033.2	264	-	FOXL1
chrX	73841406	73841413	MA0042.2	313	-	FOXI1
chrX	73841406	73841413	MA0157.4	295	-	Foxo3
chrX	73841406	73841413	MA0480.3	303	-	Foxo1
chrX	73841406	73841413	MA0481.4	303	-	FOXP1
chrX	73841406	73841413	MA0674.2	214	+	NKX6-1
chrX	73841406	73841413	MA0848.1	293	-	FOXO4
chrX	73841406	73841413	MA0849.1	317	-	FOXO6
chrX	73841406	73841413	MA0850.1	343	-	FOXP3
chrX	73841406	73841413	MA0852.3	317	-	FOXK1
chrX	73841406	73841413	MA1103.3	317	-	FOXK2
chrX	73841406	73841413	MA1606.2	285	-	Foxf1
chrX	73841406	73841413	MA1683.2	326	-	FOXA3
chrX	73841406	73841413	MA2117.1	310	-	FOXP4
chrX	73841406	73841414	MA0047.4	332	-	FOXA2
chrX	73841406	73841414	MA2118.1	356	-	FOXS1
chrX	73841407	73841416	MA0905.2	248	-	HOXC10
chrX	73841407	73841416	MA0913.3	257	-	HOXD9
chrX	73841408	73841414	MA0624.3	270	-	Nfatc1
chrX	73841408	73841414	MA1478.2	203	+	DMRTA2
chrX	73841408	73841415	MA0775.2	214	+	MEIS3
chrX	73841408	73841416	MA0465.3	296	-	CDX2
chrX	73841408	73841416	MA0774.1	286	+	MEIS2
chrX	73841408	73841417	MA0629.2	451	-	Rhox11
chrX	73841408	73841417	MA0688.2	262	-	TBX2
chrX	73841408	73841417	MA0802.2	275	-	TBR1
chrX	73841409	73841416	MA0594.3	218	-	HOXA9
chrX	73841409	73841420	MA0698.2	358	+	ZBTB18
chrX	73841409	73841421	MA0783.1	413	+	PKNOX2
chrX	73841409	73841421	MA0783.1	450	-	PKNOX2
chrX	73841409	73841421	MA0796.1	453	-	TGIF1
chrX	73841409	73841421	MA0796.1	457	+	TGIF1
chrX	73841409	73841421	MA0797.1	420	+	TGIF2
chrX	73841409	73841421	MA0797.1	423	-	TGIF2
chrX	73841409	73841421	MA1571.1	418	+	TGIF2LX
chrX	73841409	73841421	MA1571.1	420	-	TGIF2LX
chrX	73841409	73841421	MA1572.1	400	+	TGIF2LY
chrX	73841409	73841421	MA1572.1	416	-	TGIF2LY
chrX	73841410	73841419	MA0048.3	326	+	NHLH1
chrX	73841410	73841419	MA0499.3	345	-	MYOD1
chrX	73841410	73841419	MA1559.2	343	-	SNAI3
chrX	73841410	73841419	MA1618.2	376	-	Ptf1A
chrX	73841410	73841420	MA0091.2	315	+	TAL1::TCF3
chrX	73841410	73841420	MA0091.2	327	-	TAL1::TCF3
chrX	73841410	73841420	MA0665.1	399	-	MSC
chrX	73841410	73841420	MA0665.1	430	+	MSC
chrX	73841410	73841420	MA0667.1	361	-	MYF6
chrX	73841410	73841420	MA0667.1	411	+	MYF6
chrX	73841410	73841420	MA0691.1	402	-	TFAP4
chrX	73841410	73841420	MA0691.1	412	+	TFAP4
chrX	73841410	73841420	MA0816.1	389	+	Ascl2
chrX	73841410	73841420	MA0816.1	397	-	Ascl2
chrX	73841410	73841420	MA0832.2	439	+	Tcf21
chrX	73841410	73841420	MA0832.2	444	-	Tcf21
chrX	73841410	73841420	MA1468.1	277	+	ATOH7
chrX	73841410	73841420	MA1570.1	280	+	TFAP4
chrX	73841410	73841420	MA1570.1	289	-	TFAP4
chrX	73841410	73841421	MA0698.2	333	-	ZBTB18
chrX	73841411	73841418	MA1558.2	240	+	SNAI1
chrX	73841411	73841418	MA1642.2	283	-	NEUROG2
chrX	73841411	73841418	MA1648.2	268	-	TCF12
chrX	73841411	73841419	MA0500.3	421	+	MYOG
chrX	73841411	73841419	MA0500.3	421	-	MYOG
chrX	73841411	73841419	MA0668.3	340	+	Neurod2
chrX	73841411	73841419	MA0668.3	340	-	Neurod2
chrX	73841411	73841419	MA0745.3	322	+	SNAI2
chrX	73841411	73841419	MA0745.3	322	-	SNAI2
chrX	73841411	73841419	MA0830.3	281	+	TCF4
chrX	73841411	73841419	MA0830.3	281	-	TCF4
chrX	73841411	73841419	MA1100.3	397	+	ASCL1
chrX	73841411	73841419	MA1100.3	397	-	ASCL1
chrX	73841411	73841419	MA1109.2	318	+	NEUROD1
chrX	73841411	73841419	MA1109.2	318	-	NEUROD1
chrX	73841411	73841419	MA1123.3	340	+	TWIST1
chrX	73841411	73841419	MA1123.3	340	-	TWIST1
chrX	73841411	73841419	MA1472.3	481	+	Bhlha15
chrX	73841411	73841419	MA1472.3	481	-	Bhlha15
chrX	73841411	73841419	MA1593.2	317	+	ZNF317
chrX	73841411	73841419	MA1593.2	317	-	ZNF317
chrX	73841411	73841419	MA1619.2	481	+	Ptf1A
chrX	73841411	73841419	MA1619.2	481	-	Ptf1A
chrX	73841411	73841419	MA1620.2	403	+	Ptf1A
chrX	73841411	73841419	MA1620.2	403	-	Ptf1A
chrX	73841411	73841419	MA1641.2	481	+	MYF5
chrX	73841411	73841419	MA1641.2	481	-	MYF5
chrX	73841411	73841420	MA0048.3	336	-	NHLH1
chrX	73841411	73841420	MA0499.3	424	+	MYOD1
chrX	73841411	73841420	MA1559.2	288	+	SNAI3
chrX	73841411	73841420	MA1618.2	391	+	Ptf1A
chrX	73841411	73841420	MA1631.2	318	+	ASCL1
chrX	73841411	73841431	MA0138.3	547	-	REST
chrX	73841412	73841418	MA0100.4	233	+	MYB
chrX	73841412	73841418	MA0100.4	233	-	MYB
chrX	73841412	73841418	MA0103.4	246	+	ZEB1
chrX	73841412	73841418	MA0103.4	246	-	ZEB1
chrX	73841412	73841418	MA0521.3	361	+	Tcf12
chrX	73841412	73841418	MA0521.3	361	-	Tcf12
chrX	73841412	73841418	MA0633.3	361	+	Twist2
chrX	73841412	73841418	MA0633.3	361	-	Twist2
chrX	73841412	73841418	MA0820.2	331	+	FIGLA
chrX	73841412	73841418	MA0820.2	331	-	FIGLA
chrX	73841412	73841418	MA1635.2	361	+	BHLHE22
chrX	73841412	73841418	MA1635.2	361	-	BHLHE22
chrX	73841412	73841418	MA1638.2	246	+	HAND2
chrX	73841412	73841418	MA1638.2	246	-	HAND2
chrX	73841412	73841418	MA1993.2	361	+	Neurod2
chrX	73841412	73841418	MA1993.2	361	-	Neurod2
chrX	73841412	73841418	MA1997.2	361	+	Olig2
chrX	73841412	73841418	MA1997.2	361	-	Olig2
chrX	73841412	73841419	MA1558.2	240	-	SNAI1
chrX	73841412	73841419	MA1642.2	283	+	NEUROG2
chrX	73841412	73841419	MA1648.2	268	+	TCF12
chrX	73841412	73841420	MA0461.3	283	-	Atoh1
chrX	73841413	73841421	MA1655.2	310	-	ZNF341
chrX	73841413	73841421	MA1728.2	331	+	ZNF549
chrX	73841414	73841422	MA0774.1	290	-	MEIS2
chrX	73841416	73841421	MA0498.3	223	-	MEIS1
chrX	73841417	73841426	MA0519.2	235	-	Stat5a::Stat5b
chrX	73841421	73841427	MA0130.1	204	-	ZNF354C
chrX	73841422	73841428	MA1684.1	174	+	Foxn1
chrX	73841423	73841429	MA0719.2	206	+	RHOXF1
chrX	73841423	73841438	MA1532.2	374	+	NR1D2
chrX	73841424	73841438	MA1531.2	398	+	NR1D1
chrX	73841427	73841436	MA1585.2	395	+	ZKSCAN1
chrX	73841428	73841435	MA1628.2	257	+	Zic1::Zic2
chrX	73841428	73841438	MA1150.2	312	+	RORB
chrX	73841428	73841438	MA1151.2	371	+	RORC
chrX	73841430	73841438	MA0597.3	397	+	THAP1
chrX	73841430	73841438	MA1534.2	226	-	NR1I3
chrX	73841431	73841442	MA0847.4	296	+	FOXD2
chrX	73841432	73841438	MA0671.2	193	-	NFIX
chrX	73841432	73841438	MA1110.3	233	+	Nr1H4
chrX	73841432	73841438	MA1535.2	261	+	NR2C1
chrX	73841432	73841438	MA1536.2	257	+	NR2C2
chrX	73841432	73841438	MA1996.2	240	+	Nr1H2
chrX	73841432	73841438	MA2337.1	331	+	Nr1h3
chrX	73841432	73841447	MA0258.2	324	-	ESR2
chrX	73841432	73841447	MA0258.2	397	+	ESR2
chrX	73841433	73841439	MA0625.3	205	+	NFATC3
chrX	73841433	73841439	MA0671.2	221	+	NFIX
chrX	73841433	73841439	MA0738.2	283	-	HIC2
chrX	73841435	73841442	MA0033.2	216	+	FOXL1
chrX	73841435	73841442	MA0850.1	207	+	FOXP3
chrX	73841436	73841442	MA1536.2	213	-	NR2C2
chrX	73841436	73841444	MA1534.2	241	+	NR1I3
chrX	73841437	73841443	MA0100.4	243	+	MYB
chrX	73841437	73841444	MA1497.2	197	-	HOXA6
chrX	73841438	73841448	MA1516.2	280	+	KLF3
chrX	73841439	73841449	MA0599.1	245	+	KLF5
chrX	73841440	73841449	MA0685.2	295	-	SP4
chrX	73841441	73841447	MA0719.2	184	+	RHOXF1
chrX	73841441	73841448	MA0528.3	391	-	ZNF263
chrX	73841441	73841453	MA2121.1	351	-	ZNF213
chrX	73841441	73841455	MA0504.2	327	-	NR2C2
chrX	73841442	73841448	MA1684.1	203	-	Foxn1
chrX	73841442	73841448	MA1965.2	257	+	SP5
chrX	73841442	73841450	MA1102.3	353	-	CTCFL
chrX	73841443	73841449	MA2326.1	243	-	IKZF2
chrX	73841444	73841451	MA2002.2	298	-	Zfp335
chrX	73841445	73841454	MA1581.2	346	+	ZBTB6
chrX	73841448	73841454	MA0719.2	246	+	RHOXF1
chrX	73841448	73841454	MA1110.3	243	-	Nr1H4
chrX	73841448	73841454	MA1535.2	212	-	NR2C1
chrX	73841448	73841454	MA1536.2	164	-	NR2C2
chrX	73841448	73841454	MA1996.2	235	-	Nr1H2
chrX	73841448	73841454	MA2337.1	257	-	Nr1h3
chrX	73841449	73841455	MA0521.3	243	+	Tcf12
chrX	73841449	73841455	MA0521.3	243	-	Tcf12
chrX	73841449	73841455	MA0633.3	276	+	Twist2
chrX	73841449	73841455	MA0633.3	276	-	Twist2
chrX	73841449	73841455	MA0820.2	233	-	FIGLA
chrX	73841449	73841455	MA1635.2	249	+	BHLHE22
chrX	73841449	73841455	MA1635.2	270	-	BHLHE22
chrX	73841449	73841455	MA1993.2	276	+	Neurod2
chrX	73841449	73841455	MA1993.2	276	-	Neurod2
chrX	73841449	73841455	MA1997.2	276	+	Olig2
chrX	73841449	73841455	MA1997.2	276	-	Olig2
chrX	73841449	73841459	MA1979.2	331	+	ZNF416
chrX	73841450	73841460	MA1151.2	247	+	RORC
chrX	73841451	73841460	MA1730.2	308	+	ZNF708
chrX	73841452	73841460	MA1986.2	386	-	ZNF692
chrX	73841452	73841462	MA0596.1	312	+	SREBF2
chrX	73841453	73841459	MA0671.2	212	-	NFIX
chrX	73841453	73841459	MA0719.2	171	+	RHOXF1
chrX	73841454	73841462	MA1986.2	327	+	ZNF692
chrX	73841458	73841464	MA1536.2	146	-	NR2C2
chrX	73841458	73841466	MA0160.3	278	-	NR4A2
chrX	73841458	73841466	MA1534.2	224	+	NR1I3
chrX	73841458	73841473	MA0728.1	498	-	Nr2F6
chrX	73841458	73841473	MA0859.2	426	-	Rarg
chrX	73841461	73841467	MA0723.3	167	+	VAX2
chrX	73841461	73841470	MA0905.2	231	-	HOXC10
chrX	73841462	73841469	MA1152.2	260	+	SOX15
chrX	73841462	73841474	MA0017.3	306	-	NR2F1
chrX	73841462	73841475	MA1937.2	291	-	ERF::HOXB13
chrX	73841463	73841469	MA0723.3	173	+	VAX2
chrX	73841463	73841470	MA0033.2	215	-	FOXL1
chrX	73841463	73841470	MA0042.2	287	-	FOXI1
chrX	73841463	73841470	MA0848.1	256	-	FOXO4
chrX	73841463	73841470	MA0849.1	244	-	FOXO6
chrX	73841465	73841471	MA0670.2	249	-	NFIA
chrX	73841465	73841472	MA0775.2	361	+	MEIS3
chrX	73841465	73841473	MA0774.1	361	+	MEIS2
chrX	73841465	73841475	MA0488.2	292	-	JUN
chrX	73841465	73841475	MA1632.2	323	-	ATF2
chrX	73841465	73841476	MA0492.2	289	-	JUND
chrX	73841466	73841471	MA0498.3	301	+	MEIS1
chrX	73841466	73841472	MA1110.3	270	-	Nr1H4
chrX	73841466	73841472	MA1535.2	270	-	NR2C1
chrX	73841466	73841472	MA1536.2	246	-	NR2C2
chrX	73841466	73841472	MA1996.2	301	-	Nr1H2
chrX	73841466	73841472	MA2337.1	233	-	Nr1h3
chrX	73841466	73841474	MA0018.5	343	-	CREB1
chrX	73841466	73841475	MA1475.2	264	-	CREB3L4
chrX	73841466	73841476	MA1150.2	333	-	RORB
chrX	73841466	73841476	MA1151.2	326	-	RORC
chrX	73841466	73841478	MA1572.1	331	-	TGIF2LY
chrX	73841467	73841476	MA0598.4	298	+	EHF
chrX	73841468	73841474	MA0719.2	183	+	RHOXF1
chrX	73841468	73841476	MA0136.4	356	-	Elf5
chrX	73841468	73841477	MA0098.4	282	-	ETS1
chrX	73841468	73841477	MA0475.3	265	-	FLI1
chrX	73841468	73841477	MA0761.3	302	-	ETV1
chrX	73841468	73841477	MA1484.2	289	-	ETS2
chrX	73841468	73841478	MA0686.2	308	-	SPDEF
chrX	73841468	73841478	MA1483.3	264	-	ELF2
chrX	73841469	73841475	MA2326.1	246	-	IKZF2
chrX	73841469	73841479	MA1935.2	261	-	ERF::FOXI1
chrX	73841470	73841478	MA0673.2	208	+	NKX2-8
chrX	73841472	73841478	MA1684.1	174	-	Foxn1
chrX	73841472	73841479	MA0508.4	293	+	PRDM1
chrX	73841472	73841481	MA1731.2	299	+	ZNF768
chrX	73841474	73841483	MA0519.2	257	+	Stat5a::Stat5b
chrX	73841475	73841481	MA0625.3	227	-	NFATC3
chrX	73841476	73841485	MA0137.4	320	+	STAT1
chrX	73841476	73841485	MA0144.3	253	+	STAT3
chrX	73841476	73841485	MA0519.2	364	-	Stat5a::Stat5b
chrX	73841476	73841485	MA1624.2	356	+	Stat5a
chrX	73841476	73841485	MA1625.2	334	+	Stat5b
chrX	73841476	73841486	MA0518.2	325	+	Stat4
chrX	73841478	73841489	MA1647.3	337	+	Prdm4
chrX	73841480	73841487	MA0508.4	303	-	PRDM1
chrX	73841480	73841488	MA1554.2	232	-	RFX7
chrX	73841480	73841489	MA0030.2	315	+	FOXF2
chrX	73841480	73841489	MA0593.2	290	+	FOXP2
chrX	73841480	73841489	MA2098.1	330	+	ZNF766
chrX	73841480	73841490	MA0040.2	319	-	Foxq1
chrX	73841480	73841490	MA1707.2	287	+	DMRTA1
chrX	73841481	73841487	MA1684.1	174	+	Foxn1
chrX	73841481	73841488	MA0033.2	245	+	FOXL1
chrX	73841481	73841488	MA0042.2	253	+	FOXI1
chrX	73841481	73841488	MA0157.4	281	+	Foxo3
chrX	73841481	73841488	MA0480.3	285	+	Foxo1
chrX	73841481	73841488	MA0848.1	287	+	FOXO4
chrX	73841481	73841488	MA0849.1	270	+	FOXO6
chrX	73841481	73841488	MA0850.1	228	+	FOXP3
chrX	73841481	73841488	MA0852.3	281	+	FOXK1
chrX	73841481	73841488	MA1103.3	263	+	FOXK2
chrX	73841481	73841488	MA1606.2	291	+	Foxf1
chrX	73841481	73841489	MA0613.1	299	+	FOXG1
chrX	73841481	73841489	MA0614.1	299	+	Foxj2
chrX	73841481	73841490	MA0851.2	316	+	Foxj3
chrX	73841481	73841492	MA0032.2	334	+	FOXC1
chrX	73841481	73841492	MA0846.2	291	+	FOXC2
chrX	73841482	73841488	MA1478.2	291	+	DMRTA2
chrX	73841482	73841491	MA0679.3	336	+	ONECUT1
chrX	73841482	73841491	MA1562.2	305	+	SOX14
chrX	73841482	73841492	MA0078.3	317	+	Sox17
chrX	73841482	73841492	MA0515.1	319	-	Sox6
chrX	73841482	73841492	MA2095.1	334	+	Sox7
chrX	73841483	73841490	MA0084.2	421	+	SRY
chrX	73841483	73841491	MA0756.3	264	+	ONECUT2
chrX	73841483	73841491	MA1125.2	283	+	ZNF384
chrX	73841483	73841492	MA1471.2	249	-	BARX2
chrX	73841484	73841491	MA0848.1	227	+	FOXO4
chrX	73841484	73841491	MA0868.3	391	+	SOX8
chrX	73841484	73841492	MA0077.2	340	-	SOX9
chrX	73841484	73841492	MA0087.3	336	+	Sox5
chrX	73841484	73841492	MA0867.3	292	+	SOX4
chrX	73841484	73841492	MA1563.2	247	+	SOX18
chrX	73841484	73841493	MA1603.2	313	+	Dmrt1
chrX	73841485	73841492	MA0143.5	321	+	SOX2
chrX	73841485	73841492	MA0514.3	310	+	Sox3
chrX	73841485	73841492	MA1120.2	317	+	SOX13
chrX	73841485	73841492	MA1152.2	298	-	SOX15
chrX	73841485	73841495	MA0678.1	300	-	OLIG2
chrX	73841485	73841495	MA0678.1	328	+	OLIG2
chrX	73841485	73841495	MA0827.1	313	-	OLIG3
chrX	73841485	73841495	MA0827.1	359	+	OLIG3
chrX	73841486	73841492	MA0635.2	176	-	BARHL2
chrX	73841486	73841492	MA0723.3	173	+	VAX2
chrX	73841486	73841492	MA1498.3	184	+	HOXA7
chrX	73841486	73841493	MA0909.4	260	+	Hoxd13
chrX	73841486	73841494	MA0602.2	349	+	Arid5a
chrX	73841486	73841494	MA0602.2	373	-	Arid5a
chrX	73841487	73841498	MA1729.2	340	-	ZNF680
chrX	73841487	73841500	MA2120.1	312	-	ZNF184
chrX	73841488	73841496	MA1563.2	207	-	SOX18
chrX	73841489	73841495	MA0891.2	221	+	GSC2
chrX	73841489	73841496	MA0868.3	275	-	SOX8
chrX	73841489	73841497	MA1125.2	285	-	ZNF384
chrX	73841490	73841497	MA0084.2	264	-	SRY
chrX	73841490	73841498	MA1125.2	291	-	ZNF384
chrX	73841490	73841500	MA1623.2	391	-	Stat2
chrX	73841490	73841501	MA0050.4	378	-	Irf1
chrX	73841491	73841499	MA1125.2	314	-	ZNF384
chrX	73841492	73841498	MA0723.3	167	+	VAX2
chrX	73841492	73841499	MA0850.1	231	-	FOXP3
chrX	73841492	73841500	MA0867.3	241	-	SOX4
chrX	73841492	73841500	MA1125.2	262	-	ZNF384
chrX	73841492	73841503	MA0497.2	292	-	MEF2C
chrX	73841493	73841499	MA0442.3	235	-	SOX10
chrX	73841493	73841499	MA0635.2	179	-	BARHL2
chrX	73841493	73841500	MA0508.4	291	+	PRDM1
chrX	73841494	73841502	MA0606.3	303	-	Nfat5
chrX	73841494	73841503	MA1525.3	284	-	NFATC4
chrX	73841495	73841501	MA0624.3	276	-	Nfatc1
chrX	73841496	73841505	MA0144.3	241	-	STAT3
chrX	73841496	73841505	MA1471.2	270	+	BARX2
chrX	73841496	73841506	MA1544.2	310	+	OVOL1
chrX	73841496	73841506	MA1623.2	384	-	Stat2
chrX	73841496	73841507	MA0050.4	402	-	Irf1
chrX	73841498	73841505	MA0618.2	248	-	LBX1
chrX	73841498	73841505	MA0642.3	254	+	EN2
chrX	73841498	73841505	MA0644.3	207	+	ESX1
chrX	73841498	73841505	MA1496.2	201	+	HOXA4
chrX	73841498	73841505	MA1497.2	227	+	HOXA6
chrX	73841498	73841505	MA1500.2	212	-	HOXB6
chrX	73841498	73841505	MA1545.2	256	+	OVOL2
chrX	73841499	73841505	MA0027.3	198	+	EN1
chrX	73841499	73841505	MA0100.4	291	-	MYB
chrX	73841499	73841505	MA0125.2	257	-	Nobox
chrX	73841499	73841505	MA0132.3	202	+	PDX1
chrX	73841499	73841505	MA0630.2	218	-	SHOX
chrX	73841499	73841505	MA0634.2	213	+	ALX3
chrX	73841499	73841505	MA0635.2	205	-	BARHL2
chrX	73841499	73841505	MA0654.2	212	+	ISX
chrX	73841499	73841505	MA0662.2	210	+	MIXL1
chrX	73841499	73841505	MA0666.3	225	+	MSX1
chrX	73841499	73841505	MA0699.2	238	+	LBX2
chrX	73841499	73841505	MA0700.3	276	+	LHX2
chrX	73841499	73841505	MA0705.2	175	-	Lhx8
chrX	73841499	73841505	MA0705.2	183	+	Lhx8
chrX	73841499	73841505	MA0707.3	188	+	MNX1
chrX	73841499	73841505	MA0708.3	221	+	MSX2
chrX	73841499	73841505	MA0709.2	231	+	Msx3
chrX	73841499	73841505	MA0716.2	210	+	PRRX1
chrX	73841499	73841505	MA0717.2	219	+	RAX2
chrX	73841499	73841505	MA0718.2	221	+	RAX
chrX	73841499	73841505	MA0875.2	246	+	BARX1
chrX	73841499	73841505	MA0876.2	270	+	BSX
chrX	73841499	73841505	MA0877.4	216	+	BARHL1
chrX	73841499	73841505	MA0879.3	186	+	DLX1
chrX	73841499	73841505	MA0887.2	197	+	EVX1
chrX	73841499	73841505	MA0888.2	212	+	EVX2
chrX	73841499	73841505	MA0890.2	228	+	GBX2
chrX	73841499	73841505	MA0892.2	235	+	GSX1
chrX	73841499	73841505	MA0894.2	218	-	HESX1
chrX	73841499	73841505	MA0902.3	198	+	HOXB2
chrX	73841499	73841505	MA0903.2	228	+	HOXB3
chrX	73841499	73841505	MA0914.2	243	+	ISL2
chrX	73841499	73841505	MA1498.3	246	+	HOXA7
chrX	73841499	73841505	MA1499.2	246	+	HOXB4
chrX	73841499	73841505	MA1504.2	249	+	HOXC4
chrX	73841499	73841505	MA1505.2	172	+	HOXC8
chrX	73841499	73841505	MA1507.2	253	+	HOXD4
chrX	73841499	73841505	MA1577.2	208	+	TLX2
chrX	73841499	73841506	MA0893.3	185	-	GSX2
chrX	73841499	73841506	MA0895.2	227	+	HMBOX1
chrX	73841500	73841507	MA0601.2	227	+	Arid3b
chrX	73841500	73841509	MA0899.2	315	-	HOXA10
chrX	73841500	73841509	MA0905.2	251	-	HOXC10
chrX	73841500	73841509	MA0913.3	264	-	HOXD9
chrX	73841500	73841509	MA1473.2	324	-	CDX4
chrX	73841501	73841508	MA0594.3	214	+	HOXA9
chrX	73841501	73841508	MA0618.2	298	-	LBX1
chrX	73841501	73841508	MA0642.3	275	+	EN2
chrX	73841501	73841508	MA0644.3	233	+	ESX1
chrX	73841501	73841508	MA0661.2	268	+	MEOX1
chrX	73841501	73841508	MA0674.2	240	-	NKX6-1
chrX	73841501	73841508	MA0701.3	240	+	LHX9
chrX	73841501	73841508	MA0706.2	265	+	MEOX2
chrX	73841501	73841508	MA0722.2	210	+	VAX1
chrX	73841501	73841508	MA0889.2	250	+	GBX1
chrX	73841501	73841508	MA0893.3	240	+	GSX2
chrX	73841501	73841508	MA0909.4	279	-	Hoxd13
chrX	73841501	73841508	MA0910.3	226	+	HOXD8
chrX	73841501	73841508	MA1496.2	215	+	HOXA4
chrX	73841501	73841508	MA1497.2	331	+	HOXA6
chrX	73841501	73841508	MA1500.2	266	-	HOXB6
chrX	73841501	73841508	MA1501.2	259	+	HOXB7
chrX	73841501	73841508	MA1502.2	225	+	HOXB8
chrX	73841501	73841508	MA1519.2	257	+	LHX5
chrX	73841501	73841508	MA1549.2	242	-	POU6F1
chrX	73841501	73841508	MA2093.1	234	+	HOXB1
chrX	73841501	73841508	MA2119.1	249	+	HOXA3
chrX	73841501	73841509	MA0158.2	267	+	HOXA5
chrX	73841501	73841509	MA0158.2	267	-	HOXA5
chrX	73841501	73841509	MA0465.3	297	-	CDX2
chrX	73841501	73841509	MA1530.2	288	+	NKX6-3
chrX	73841501	73841510	MA0899.2	258	+	HOXA10
chrX	73841501	73841510	MA0905.2	244	+	HOXC10
chrX	73841502	73841508	MA0027.3	209	+	EN1
chrX	73841502	73841508	MA0027.3	246	-	EN1
chrX	73841502	73841508	MA0125.2	246	+	Nobox
chrX	73841502	73841508	MA0125.2	265	-	Nobox
chrX	73841502	73841508	MA0132.3	221	-	PDX1
chrX	73841502	73841508	MA0132.3	265	+	PDX1
chrX	73841502	73841508	MA0612.3	225	-	EMX1
chrX	73841502	73841508	MA0612.3	253	+	EMX1
chrX	73841502	73841508	MA0628.2	265	+	POU6F1
chrX	73841502	73841508	MA0628.2	265	-	POU6F1
chrX	73841502	73841508	MA0630.2	235	+	SHOX
chrX	73841502	73841508	MA0630.2	291	-	SHOX
chrX	73841502	73841508	MA0634.2	261	+	ALX3
chrX	73841502	73841508	MA0634.2	270	-	ALX3
chrX	73841502	73841508	MA0635.2	170	-	BARHL2
chrX	73841502	73841508	MA0635.2	191	+	BARHL2
chrX	73841502	73841508	MA0654.2	225	-	ISX
chrX	73841502	73841508	MA0654.2	265	+	ISX
chrX	73841502	73841508	MA0662.2	233	+	MIXL1
chrX	73841502	73841508	MA0662.2	238	-	MIXL1
chrX	73841502	73841508	MA0666.3	204	+	MSX1
chrX	73841502	73841508	MA0666.3	204	-	MSX1
chrX	73841502	73841508	MA0675.2	276	-	NKX6-2
chrX	73841502	73841508	MA0675.2	291	+	NKX6-2
chrX	73841502	73841508	MA0699.2	216	+	LBX2
chrX	73841502	73841508	MA0699.2	235	-	LBX2
chrX	73841502	73841508	MA0700.3	240	+	LHX2
chrX	73841502	73841508	MA0704.2	189	-	Lhx4
chrX	73841502	73841508	MA0704.2	276	+	Lhx4
chrX	73841502	73841508	MA0705.2	202	+	Lhx8
chrX	73841502	73841508	MA0705.2	202	-	Lhx8
chrX	73841502	73841508	MA0707.3	209	-	MNX1
chrX	73841502	73841508	MA0707.3	210	+	MNX1
chrX	73841502	73841508	MA0708.3	200	+	MSX2
chrX	73841502	73841508	MA0708.3	243	-	MSX2
chrX	73841502	73841508	MA0709.2	227	+	Msx3
chrX	73841502	73841508	MA0709.2	233	-	Msx3
chrX	73841502	73841508	MA0716.2	238	+	PRRX1
chrX	73841502	73841508	MA0716.2	265	-	PRRX1
chrX	73841502	73841508	MA0717.2	231	-	RAX2
chrX	73841502	73841508	MA0717.2	235	+	RAX2
chrX	73841502	73841508	MA0718.2	238	+	RAX
chrX	73841502	73841508	MA0718.2	257	-	RAX
chrX	73841502	73841508	MA0720.2	253	-	Shox2
chrX	73841502	73841508	MA0720.2	270	+	Shox2
chrX	73841502	73841508	MA0721.2	253	+	UNCX
chrX	73841502	73841508	MA0721.2	257	-	UNCX
chrX	73841502	73841508	MA0723.3	257	-	VAX2
chrX	73841502	73841508	MA0723.3	283	+	VAX2
chrX	73841502	73841508	MA0875.2	228	+	BARX1
chrX	73841502	73841508	MA0876.2	210	-	BSX
chrX	73841502	73841508	MA0876.2	233	+	BSX
chrX	73841502	73841508	MA0879.3	249	+	DLX1
chrX	73841502	73841508	MA0880.2	231	-	Dlx3
chrX	73841502	73841508	MA0880.2	253	+	Dlx3
chrX	73841502	73841508	MA0881.2	228	-	Dlx4
chrX	73841502	73841508	MA0881.2	253	+	Dlx4
chrX	73841502	73841508	MA0882.2	227	-	DLX6
chrX	73841502	73841508	MA0882.2	265	+	DLX6
chrX	73841502	73841508	MA0886.2	214	-	EMX2
chrX	73841502	73841508	MA0886.2	283	+	EMX2
chrX	73841502	73841508	MA0887.2	235	-	EVX1
chrX	73841502	73841508	MA0887.2	270	+	EVX1
chrX	73841502	73841508	MA0888.2	214	-	EVX2
chrX	73841502	73841508	MA0888.2	265	+	EVX2
chrX	73841502	73841508	MA0890.2	231	+	GBX2
chrX	73841502	73841508	MA0890.2	240	-	GBX2
chrX	73841502	73841508	MA0891.2	213	-	GSC2
chrX	73841502	73841508	MA0892.2	257	-	GSX1
chrX	73841502	73841508	MA0892.2	291	+	GSX1
chrX	73841502	73841508	MA0894.2	208	-	HESX1
chrX	73841502	73841508	MA0894.2	253	+	HESX1
chrX	73841502	73841508	MA0900.3	227	-	HOXA2
chrX	73841502	73841508	MA0900.3	265	+	HOXA2
chrX	73841502	73841508	MA0902.3	216	+	HOXB2
chrX	73841502	73841508	MA0902.3	235	-	HOXB2
chrX	73841502	73841508	MA0903.2	233	-	HOXB3
chrX	73841502	73841508	MA0903.2	270	+	HOXB3
chrX	73841502	73841508	MA0904.3	214	+	HOXB5
chrX	73841502	73841508	MA0904.3	238	-	HOXB5
chrX	73841502	73841508	MA1481.2	198	+	DRGX
chrX	73841502	73841508	MA1481.2	198	-	DRGX
chrX	73841502	73841508	MA1495.2	195	+	HOXA1
chrX	73841502	73841508	MA1495.2	205	-	HOXA1
chrX	73841502	73841508	MA1498.3	243	-	HOXA7
chrX	73841502	73841508	MA1498.3	261	+	HOXA7
chrX	73841502	73841508	MA1499.2	202	-	HOXB4
chrX	73841502	73841508	MA1499.2	240	+	HOXB4
chrX	73841502	73841508	MA1504.2	198	-	HOXC4
chrX	73841502	73841508	MA1504.2	238	+	HOXC4
chrX	73841502	73841508	MA1505.2	253	-	HOXC8
chrX	73841502	73841508	MA1505.2	257	+	HOXC8
chrX	73841502	73841508	MA1507.2	203	-	HOXD4
chrX	73841502	73841508	MA1507.2	246	+	HOXD4
chrX	73841502	73841508	MA1577.2	231	+	TLX2
chrX	73841502	73841508	MA1577.2	231	-	TLX2
chrX	73841502	73841509	MA0594.3	227	-	HOXA9
chrX	73841502	73841509	MA0642.3	245	-	EN2
chrX	73841502	73841509	MA0644.3	209	-	ESX1
chrX	73841502	73841509	MA0661.2	249	-	MEOX1
chrX	73841502	73841509	MA0674.2	281	+	NKX6-1
chrX	73841502	73841509	MA0706.2	278	-	MEOX2
chrX	73841502	73841509	MA0710.2	207	-	NOTO
chrX	73841502	73841509	MA0722.2	232	-	VAX1
chrX	73841502	73841509	MA0889.2	262	-	GBX1
chrX	73841502	73841509	MA0893.3	207	-	GSX2
chrX	73841502	73841509	MA0910.3	285	-	HOXD8
chrX	73841502	73841509	MA1496.2	188	-	HOXA4
chrX	73841502	73841509	MA1497.2	351	-	HOXA6
chrX	73841502	73841509	MA1500.2	281	+	HOXB6
chrX	73841502	73841509	MA1501.2	336	-	HOXB7
chrX	73841502	73841509	MA1502.2	285	-	HOXB8
chrX	73841502	73841509	MA1519.2	268	-	LHX5
chrX	73841502	73841509	MA1963.2	298	-	SATB1
chrX	73841502	73841509	MA2093.1	234	-	HOXB1
chrX	73841502	73841509	MA2119.1	243	-	HOXA3
chrX	73841502	73841509	MA2339.1	273	-	Nanog
chrX	73841502	73841512	MA1707.2	253	+	DMRTA1
chrX	73841503	73841509	MA0891.2	202	+	GSC2
chrX	73841504	73841510	MA0151.1	228	+	Arid3a
chrX	73841504	73841510	MA1478.2	189	+	DMRTA2
chrX	73841504	73841511	MA0601.2	226	-	Arid3b
chrX	73841504	73841512	MA1142.2	255	+	FOSL1::JUND
chrX	73841504	73841513	MA0523.2	306	+	TCF7L2
chrX	73841505	73841512	MA0084.2	283	+	SRY
chrX	73841505	73841513	MA0869.3	290	+	Sox11
chrX	73841505	73841515	MA0520.2	299	-	Stat6
chrX	73841505	73841515	MA0520.2	411	+	Stat6
chrX	73841506	73841513	MA0108.3	233	+	TBP
chrX	73841506	73841513	MA0769.3	276	-	TCF7
chrX	73841506	73841513	MA0868.3	279	+	SOX8
chrX	73841506	73841514	MA0867.3	340	+	SOX4
chrX	73841506	73841515	MA0144.3	234	+	STAT3
chrX	73841506	73841515	MA0519.2	250	+	Stat5a::Stat5b
chrX	73841506	73841515	MA0519.2	314	-	Stat5a::Stat5b
chrX	73841506	73841515	MA1603.2	398	+	Dmrt1
chrX	73841506	73841515	MA1624.2	305	+	Stat5a
chrX	73841506	73841516	MA0518.2	275	+	Stat4
chrX	73841507	73841513	MA0442.3	361	+	SOX10
chrX	73841507	73841514	MA0143.5	295	+	SOX2
chrX	73841507	73841514	MA0514.3	291	+	Sox3
chrX	73841507	73841514	MA0850.1	261	+	FOXP3
chrX	73841507	73841514	MA1120.2	281	+	SOX13
chrX	73841507	73841514	MA1152.2	326	-	SOX15
chrX	73841507	73841519	MA2101.1	410	+	ZNF677
chrX	73841508	73841514	MA0723.3	166	+	VAX2
chrX	73841509	73841521	MA1592.2	305	-	ZNF274
chrX	73841510	73841517	MA2336.1	301	+	ZSCAN21
chrX	73841510	73841518	MA1563.2	210	+	SOX18
chrX	73841510	73841520	MA0667.1	316	+	MYF6
chrX	73841512	73841518	MA0100.4	265	+	MYB
chrX	73841512	73841519	MA1496.2	196	-	HOXA4
chrX	73841512	73841520	MA1655.2	285	+	ZNF341
chrX	73841512	73841524	MA0842.3	293	+	NRL
chrX	73841513	73841522	MA1618.2	286	-	Ptf1A
chrX	73841513	73841523	MA0091.2	348	+	TAL1::TCF3
chrX	73841513	73841523	MA0091.2	348	-	TAL1::TCF3
chrX	73841513	73841523	MA0665.1	441	+	MSC
chrX	73841513	73841523	MA0665.1	441	-	MSC
chrX	73841513	73841523	MA0667.1	420	+	MYF6
chrX	73841513	73841523	MA0667.1	460	-	MYF6
chrX	73841513	73841523	MA0691.1	377	+	TFAP4
chrX	73841513	73841523	MA0691.1	379	-	TFAP4
chrX	73841513	73841523	MA0816.1	370	-	Ascl2
chrX	73841513	73841523	MA0816.1	405	+	Ascl2
chrX	73841513	73841523	MA0832.2	448	+	Tcf21
chrX	73841513	73841523	MA0832.2	448	-	Tcf21
chrX	73841513	73841523	MA1468.1	269	+	ATOH7
chrX	73841513	73841523	MA1570.1	243	+	TFAP4
chrX	73841513	73841523	MA1570.1	243	-	TFAP4
chrX	73841514	73841521	MA0697.3	310	-	Zic3
chrX	73841514	73841521	MA1628.2	321	-	Zic1::Zic2
chrX	73841514	73841521	MA2336.1	266	-	ZSCAN21
chrX	73841514	73841522	MA0500.3	295	+	MYOG
chrX	73841514	73841522	MA0500.3	296	-	MYOG
chrX	73841514	73841522	MA1100.3	264	-	ASCL1
chrX	73841514	73841522	MA1100.3	280	+	ASCL1
chrX	73841514	73841522	MA1472.3	364	+	Bhlha15
chrX	73841514	73841522	MA1472.3	364	-	Bhlha15
chrX	73841514	73841522	MA1542.2	280	+	OSR1
chrX	73841514	73841522	MA1593.2	356	-	ZNF317
chrX	73841514	73841522	MA1619.2	311	-	Ptf1A
chrX	73841514	73841522	MA1619.2	316	+	Ptf1A
chrX	73841514	73841522	MA1641.2	345	+	MYF5
chrX	73841514	73841522	MA1641.2	345	-	MYF5
chrX	73841514	73841522	MA1646.2	303	-	OSR2
chrX	73841514	73841523	MA1629.2	335	-	Zic2
chrX	73841515	73841521	MA0521.3	233	+	Tcf12
chrX	73841515	73841521	MA0521.3	233	-	Tcf12
chrX	73841515	73841521	MA0633.3	233	+	Twist2
chrX	73841515	73841521	MA0633.3	233	-	Twist2
chrX	73841515	73841521	MA0820.2	209	+	FIGLA
chrX	73841515	73841521	MA0820.2	243	-	FIGLA
chrX	73841515	73841521	MA1635.2	233	+	BHLHE22
chrX	73841515	73841521	MA1635.2	233	-	BHLHE22
chrX	73841515	73841521	MA1993.2	233	+	Neurod2
chrX	73841515	73841521	MA1993.2	233	-	Neurod2
chrX	73841515	73841521	MA1997.2	233	+	Olig2
chrX	73841515	73841521	MA1997.2	233	-	Olig2
chrX	73841516	73841524	MA1655.2	381	-	ZNF341
chrX	73841516	73841525	MA0629.2	318	+	Rhox11
chrX	73841518	73841524	MA0100.4	249	-	MYB
chrX	73841518	73841525	MA1152.2	261	+	SOX15
chrX	73841518	73841526	MA0867.3	240	-	SOX4
chrX	73841518	73841526	MA1563.2	202	-	SOX18
chrX	73841518	73841528	MA0595.1	293	-	SREBF1
chrX	73841518	73841528	MA0596.1	328	+	SREBF2
chrX	73841519	73841527	MA0801.1	249	+	MGA
chrX	73841519	73841527	MA1554.2	217	+	RFX7
chrX	73841520	73841531	MA0117.3	358	+	Mafb
chrX	73841520	73841532	MA0842.3	389	+	NRL
chrX	73841521	73841528	MA0594.3	200	-	HOXA9
chrX	73841522	73841527	MA0498.3	210	-	MEIS1
chrX	73841523	73841530	MA0661.2	236	+	MEOX1
chrX	73841523	73841530	MA0674.2	217	-	NKX6-1
chrX	73841523	73841530	MA0706.2	249	+	MEOX2
chrX	73841523	73841530	MA0910.3	218	+	HOXD8
chrX	73841523	73841530	MA1496.2	217	+	HOXA4
chrX	73841523	73841530	MA1497.2	201	+	HOXA6
chrX	73841523	73841530	MA1500.2	228	-	HOXB6
chrX	73841523	73841530	MA1502.2	219	+	HOXB8
chrX	73841523	73841530	MA2093.1	268	+	HOXB1
chrX	73841523	73841530	MA2119.1	218	+	HOXA3
chrX	73841523	73841531	MA0158.2	254	-	HOXA5
chrX	73841523	73841531	MA0158.2	279	+	HOXA5
chrX	73841523	73841531	MA1530.2	282	-	NKX6-3
chrX	73841524	73841530	MA0027.3	223	-	EN1
chrX	73841524	73841530	MA0662.2	195	+	MIXL1
chrX	73841524	73841530	MA0662.2	198	-	MIXL1
chrX	73841524	73841530	MA0675.2	246	-	NKX6-2
chrX	73841524	73841530	MA0704.2	238	-	Lhx4
chrX	73841524	73841530	MA0705.2	223	+	Lhx8
chrX	73841524	73841530	MA0705.2	233	-	Lhx8
chrX	73841524	73841530	MA0707.3	243	-	MNX1
chrX	73841524	73841530	MA0707.3	253	+	MNX1
chrX	73841524	73841530	MA0708.3	195	-	MSX2
chrX	73841524	73841530	MA0723.3	169	-	VAX2
chrX	73841524	73841530	MA0723.3	198	+	VAX2
chrX	73841524	73841530	MA0879.3	179	+	DLX1
chrX	73841524	73841530	MA0879.3	221	-	DLX1
chrX	73841524	73841530	MA0886.2	238	+	EMX2
chrX	73841524	73841530	MA0887.2	202	+	EVX1
chrX	73841524	73841530	MA0887.2	227	-	EVX1
chrX	73841524	73841530	MA0888.2	204	+	EVX2
chrX	73841524	73841530	MA0888.2	225	-	EVX2
chrX	73841524	73841530	MA0892.2	216	-	GSX1
chrX	73841524	73841530	MA0900.3	204	-	HOXA2
chrX	73841524	73841530	MA0902.3	197	-	HOXB2
chrX	73841524	73841530	MA0902.3	253	+	HOXB2
chrX	73841524	73841530	MA0903.2	238	-	HOXB3
chrX	73841524	73841530	MA0904.3	213	-	HOXB5
chrX	73841524	73841530	MA1481.2	195	-	DRGX
chrX	73841524	73841530	MA1481.2	209	+	DRGX
chrX	73841524	73841530	MA1495.2	246	-	HOXA1
chrX	73841524	73841530	MA1495.2	249	+	HOXA1
chrX	73841524	73841530	MA1498.3	205	-	HOXA7
chrX	73841524	73841530	MA1499.2	218	-	HOXB4
chrX	73841524	73841530	MA1504.2	214	-	HOXC4
chrX	73841524	73841530	MA1505.2	169	+	HOXC8
chrX	73841524	73841530	MA1505.2	193	-	HOXC8
chrX	73841524	73841530	MA1507.2	219	-	HOXD4
chrX	73841524	73841531	MA0042.2	264	-	FOXI1
chrX	73841524	73841531	MA0594.3	238	-	HOXA9
chrX	73841524	73841531	MA0661.2	275	-	MEOX1
chrX	73841524	73841531	MA0706.2	301	-	MEOX2
chrX	73841524	73841531	MA0848.1	233	-	FOXO4
chrX	73841524	73841531	MA0849.1	241	-	FOXO6
chrX	73841524	73841531	MA0893.3	198	-	GSX2
chrX	73841524	73841531	MA0910.3	221	-	HOXD8
chrX	73841524	73841531	MA1496.2	283	-	HOXA4
chrX	73841524	73841531	MA1497.2	223	-	HOXA6
chrX	73841524	73841531	MA1500.2	184	+	HOXB6
chrX	73841524	73841531	MA1501.2	235	-	HOXB7
chrX	73841524	73841531	MA1502.2	220	-	HOXB8
chrX	73841524	73841531	MA1519.2	220	-	LHX5
chrX	73841524	73841531	MA1549.2	276	+	POU6F1
chrX	73841524	73841531	MA2093.1	279	-	HOXB1
chrX	73841524	73841531	MA2119.1	224	-	HOXA3
chrX	73841524	73841531	MA2339.1	278	-	Nanog
chrX	73841524	73841532	MA0018.5	295	+	CREB1
chrX	73841524	73841533	MA1471.2	269	-	BARX2
chrX	73841525	73841535	MA0478.2	287	+	FOSL2
chrX	73841526	73841533	MA0775.2	213	+	MEIS3
chrX	73841526	73841533	MA0895.2	243	-	HMBOX1
chrX	73841526	73841534	MA1132.2	269	+	JUN::JUNB
chrX	73841526	73841534	MA1142.2	252	+	FOSL1::JUND
chrX	73841526	73841535	MA0099.4	301	-	FOS::JUN
chrX	73841526	73841535	MA0477.3	299	+	FOSL1
chrX	73841526	73841535	MA0490.3	311	+	JUNB
chrX	73841526	73841535	MA0491.3	299	+	JUND
chrX	73841526	73841535	MA1128.2	316	+	FOSL1::JUN
chrX	73841526	73841535	MA1130.2	292	-	FOSL2::JUN
chrX	73841526	73841535	MA1134.2	298	-	FOS::JUNB
chrX	73841526	73841535	MA1135.2	302	+	FOSB::JUNB
chrX	73841526	73841535	MA1137.2	334	+	FOSL1::JUNB
chrX	73841526	73841535	MA1138.2	300	+	FOSL2::JUNB
chrX	73841526	73841535	MA1141.2	307	-	FOS::JUND
chrX	73841526	73841535	MA1144.2	295	+	FOSL2::JUND
chrX	73841526	73841535	MA1633.2	313	+	BACH1
chrX	73841527	73841532	MA0498.3	231	+	MEIS1
chrX	73841527	73841533	MA0705.2	169	+	Lhx8
chrX	73841527	73841533	MA0705.2	190	-	Lhx8
chrX	73841527	73841533	MA0707.3	198	+	MNX1
chrX	73841527	73841533	MA0887.2	184	+	EVX1
chrX	73841527	73841533	MA0888.2	182	+	EVX2
chrX	73841527	73841534	MA0618.2	224	+	LBX1
chrX	73841527	73841534	MA1153.2	281	+	Smad4
chrX	73841527	73841534	MA1496.2	193	-	HOXA4
chrX	73841527	73841534	MA1988.2	262	+	Atf3
chrX	73841527	73841536	MA1471.2	249	-	BARX2
chrX	73841529	73841544	MA0897.2	462	-	Hmx2
chrX	73841530	73841537	MA0075.4	263	+	PRRX2
chrX	73841530	73841537	MA0594.3	217	+	HOXA9
chrX	73841530	73841537	MA0618.2	373	-	LBX1
chrX	73841530	73841537	MA0642.3	265	+	EN2
chrX	73841530	73841537	MA0644.3	230	+	ESX1
chrX	73841530	73841537	MA0661.2	238	+	MEOX1
chrX	73841530	73841537	MA0701.3	258	+	LHX9
chrX	73841530	73841537	MA0702.3	259	+	LMX1A
chrX	73841530	73841537	MA0706.2	209	+	MEOX2
chrX	73841530	73841537	MA0710.2	221	+	NOTO
chrX	73841530	73841537	MA0722.2	219	+	VAX1
chrX	73841530	73841537	MA0725.2	257	+	VSX1
chrX	73841530	73841537	MA0726.2	266	+	VSX2
chrX	73841530	73841537	MA0889.2	237	+	GBX1
chrX	73841530	73841537	MA0893.3	295	+	GSX2
chrX	73841530	73841537	MA1496.2	266	+	HOXA4
chrX	73841530	73841537	MA1497.2	242	+	HOXA6
chrX	73841530	73841537	MA1500.2	225	-	HOXB6
chrX	73841530	73841537	MA1519.2	245	+	LHX5
chrX	73841530	73841537	MA2093.1	222	+	HOXB1
chrX	73841530	73841537	MA2119.1	235	+	HOXA3
chrX	73841530	73841538	MA0658.2	280	-	LHX6
chrX	73841530	73841538	MA0912.2	256	+	HOXD3
chrX	73841530	73841539	MA0905.2	231	+	HOXC10
chrX	73841531	73841537	MA0027.3	209	+	EN1
chrX	73841531	73841537	MA0027.3	209	-	EN1
chrX	73841531	73841537	MA0125.2	208	+	Nobox
chrX	73841531	73841537	MA0125.2	238	-	Nobox
chrX	73841531	73841537	MA0132.3	221	+	PDX1
chrX	73841531	73841537	MA0132.3	221	-	PDX1
chrX	73841531	73841537	MA0612.3	225	+	EMX1
chrX	73841531	73841537	MA0612.3	225	-	EMX1
chrX	73841531	73841537	MA0628.2	249	+	POU6F1
chrX	73841531	73841537	MA0628.2	249	-	POU6F1
chrX	73841531	73841537	MA0630.2	214	-	SHOX
chrX	73841531	73841537	MA0634.2	204	-	ALX3
chrX	73841531	73841537	MA0634.2	218	+	ALX3
chrX	73841531	73841537	MA0654.2	219	-	ISX
chrX	73841531	73841537	MA0654.2	225	+	ISX
chrX	73841531	73841537	MA0662.2	216	-	MIXL1
chrX	73841531	73841537	MA0662.2	221	+	MIXL1
chrX	73841531	73841537	MA0666.3	204	+	MSX1
chrX	73841531	73841537	MA0666.3	204	-	MSX1
chrX	73841531	73841537	MA0675.2	186	+	NKX6-2
chrX	73841531	73841537	MA0699.2	227	+	LBX2
chrX	73841531	73841537	MA0704.2	189	+	Lhx4
chrX	73841531	73841537	MA0704.2	189	-	Lhx4
chrX	73841531	73841537	MA0705.2	206	+	Lhx8
chrX	73841531	73841537	MA0705.2	206	-	Lhx8
chrX	73841531	73841537	MA0707.3	210	+	MNX1
chrX	73841531	73841537	MA0707.3	210	-	MNX1
chrX	73841531	73841537	MA0708.3	197	-	MSX2
chrX	73841531	73841537	MA0708.3	200	+	MSX2
chrX	73841531	73841537	MA0709.2	218	+	Msx3
chrX	73841531	73841537	MA0716.2	218	+	PRRX1
chrX	73841531	73841537	MA0717.2	212	-	RAX2
chrX	73841531	73841537	MA0717.2	216	+	RAX2
chrX	73841531	73841537	MA0718.2	203	-	RAX
chrX	73841531	73841537	MA0718.2	216	+	RAX
chrX	73841531	73841537	MA0721.2	221	-	UNCX
chrX	73841531	73841537	MA0875.2	227	+	BARX1
chrX	73841531	73841537	MA0876.2	257	+	BSX
chrX	73841531	73841537	MA0886.2	218	+	EMX2
chrX	73841531	73841537	MA0886.2	218	-	EMX2
chrX	73841531	73841537	MA0887.2	201	-	EVX1
chrX	73841531	73841537	MA0887.2	238	+	EVX1
chrX	73841531	73841537	MA0888.2	202	-	EVX2
chrX	73841531	73841537	MA0888.2	249	+	EVX2
chrX	73841531	73841537	MA0890.2	216	-	GBX2
chrX	73841531	73841537	MA0890.2	227	+	GBX2
chrX	73841531	73841537	MA0892.2	238	-	GSX1
chrX	73841531	73841537	MA0892.2	270	+	GSX1
chrX	73841531	73841537	MA0894.2	208	-	HESX1
chrX	73841531	73841537	MA0894.2	233	+	HESX1
chrX	73841531	73841537	MA0900.3	227	+	HOXA2
chrX	73841531	73841537	MA0900.3	227	-	HOXA2
chrX	73841531	73841537	MA0902.3	216	+	HOXB2
chrX	73841531	73841537	MA0902.3	216	-	HOXB2
chrX	73841531	73841537	MA0903.2	203	-	HOXB3
chrX	73841531	73841537	MA0903.2	246	+	HOXB3
chrX	73841531	73841537	MA0904.3	214	+	HOXB5
chrX	73841531	73841537	MA0904.3	214	-	HOXB5
chrX	73841531	73841537	MA1481.2	198	+	DRGX
chrX	73841531	73841537	MA1481.2	198	-	DRGX
chrX	73841531	73841537	MA1495.2	195	+	HOXA1
chrX	73841531	73841537	MA1495.2	195	-	HOXA1
chrX	73841531	73841537	MA1498.3	219	+	HOXA7
chrX	73841531	73841537	MA1499.2	206	-	HOXB4
chrX	73841531	73841537	MA1499.2	270	+	HOXB4
chrX	73841531	73841537	MA1504.2	198	-	HOXC4
chrX	73841531	73841537	MA1504.2	270	+	HOXC4
chrX	73841531	73841537	MA1505.2	183	-	HOXC8
chrX	73841531	73841537	MA1505.2	187	+	HOXC8
chrX	73841531	73841537	MA1507.2	203	-	HOXD4
chrX	73841531	73841537	MA1507.2	270	+	HOXD4
chrX	73841531	73841537	MA1577.2	231	+	TLX2
chrX	73841531	73841537	MA1577.2	231	-	TLX2
chrX	73841531	73841538	MA0033.2	263	-	FOXL1
chrX	73841531	73841538	MA0674.2	212	+	NKX6-1
chrX	73841531	73841538	MA0850.1	224	-	FOXP3
chrX	73841531	73841538	MA0893.3	224	-	GSX2
chrX	73841531	73841538	MA0895.2	351	+	HMBOX1
chrX	73841531	73841538	MA1496.2	184	-	HOXA4
chrX	73841531	73841540	MA1471.2	234	-	BARX2
chrX	73841531	73841540	MA1471.2	237	+	BARX2
chrX	73841531	73841545	MA0041.3	413	-	FOXD3
chrX	73841532	73841539	MA0601.2	227	+	Arid3b
chrX	73841533	73841540	MA0036.4	253	+	GATA2
chrX	73841533	73841540	MA0909.4	263	-	Hoxd13
chrX	73841533	73841540	MA1497.2	225	+	HOXA6
chrX	73841533	73841541	MA0650.4	282	-	Hoxa13
chrX	73841533	73841542	MA0899.2	264	-	HOXA10
chrX	73841533	73841542	MA0913.3	288	-	HOXD9
chrX	73841534	73841540	MA0634.2	214	-	ALX3
chrX	73841534	73841540	MA0635.2	188	+	BARHL2
chrX	73841534	73841540	MA0662.2	193	-	MIXL1
chrX	73841534	73841540	MA0675.2	190	-	NKX6-2
chrX	73841534	73841540	MA0704.2	188	+	Lhx4
chrX	73841534	73841540	MA0716.2	219	-	PRRX1
chrX	73841534	73841540	MA0718.2	212	-	RAX
chrX	73841534	73841540	MA0720.2	212	-	Shox2
chrX	73841534	73841540	MA0721.2	210	-	UNCX
chrX	73841534	73841540	MA0723.3	187	-	VAX2
chrX	73841534	73841540	MA0723.3	197	+	VAX2
chrX	73841534	73841540	MA0879.3	197	+	DLX1
chrX	73841534	73841540	MA0892.2	187	-	GSX1
chrX	73841534	73841540	MA0892.2	192	+	GSX1
chrX	73841534	73841540	MA0903.2	192	-	HOXB3
chrX	73841534	73841540	MA1498.3	181	+	HOXA7
chrX	73841534	73841540	MA1498.3	203	-	HOXA7
chrX	73841534	73841541	MA0710.2	245	-	NOTO
chrX	73841534	73841541	MA0722.2	220	-	VAX1
chrX	73841534	73841541	MA0725.2	238	-	VSX1
chrX	73841534	73841541	MA1963.2	321	-	SATB1
chrX	73841534	73841542	MA0158.2	217	-	HOXA5
chrX	73841534	73841542	MA0614.1	266	-	Foxj2
chrX	73841534	73841542	MA0885.3	308	-	Dlx2
chrX	73841534	73841542	MA1476.3	306	-	Dlx5
chrX	73841534	73841543	MA0724.1	240	-	VENTX
chrX	73841534	73841543	MA0896.2	383	-	Hmx1
chrX	73841534	73841543	MA0898.2	389	-	Hmx3
chrX	73841534	73841545	MA0032.2	336	-	FOXC1
chrX	73841534	73841545	MA0845.1	308	-	FOXB1
chrX	73841534	73841545	MA0846.2	370	-	FOXC2
chrX	73841534	73841546	MA0787.1	327	-	POU3F2
chrX	73841534	73841546	MA1487.3	336	-	FOXE1
chrX	73841535	73841541	MA0027.3	198	-	EN1
chrX	73841535	73841541	MA0125.2	219	+	Nobox
chrX	73841535	73841541	MA0132.3	202	-	PDX1
chrX	73841535	73841541	MA0654.2	208	-	ISX
chrX	73841535	73841541	MA0666.3	225	-	MSX1
chrX	73841535	73841541	MA0675.2	209	-	NKX6-2
chrX	73841535	73841541	MA0700.3	291	-	LHX2
chrX	73841535	73841541	MA0704.2	203	+	Lhx4
chrX	73841535	73841541	MA0705.2	175	+	Lhx8
chrX	73841535	73841541	MA0705.2	183	-	Lhx8
chrX	73841535	73841541	MA0707.3	188	-	MNX1
chrX	73841535	73841541	MA0708.3	216	-	MSX2
chrX	73841535	73841541	MA0718.2	291	-	RAX
chrX	73841535	73841541	MA0720.2	208	-	Shox2
chrX	73841535	73841541	MA0723.3	204	-	VAX2
chrX	73841535	73841541	MA0875.2	202	-	BARX1
chrX	73841535	73841541	MA0879.3	186	-	DLX1
chrX	73841535	73841541	MA0880.2	223	-	Dlx3
chrX	73841535	73841541	MA0881.2	213	-	Dlx4
chrX	73841535	73841541	MA0882.2	216	-	DLX6
chrX	73841535	73841541	MA0892.2	221	-	GSX1
chrX	73841535	73841541	MA0894.2	218	+	HESX1
chrX	73841535	73841541	MA0902.3	198	-	HOXB2
chrX	73841535	73841541	MA0914.2	218	-	ISL2
chrX	73841535	73841541	MA1505.2	170	-	HOXC8
chrX	73841535	73841541	MA1577.2	208	-	TLX2
chrX	73841535	73841542	MA0033.2	313	-	FOXL1
chrX	73841535	73841542	MA0042.2	273	-	FOXI1
chrX	73841535	73841542	MA0642.3	217	-	EN2
chrX	73841535	73841542	MA0848.1	253	-	FOXO4
chrX	73841535	73841542	MA0850.1	289	-	FOXP3
chrX	73841535	73841542	MA0889.2	224	-	GBX1
chrX	73841535	73841542	MA0893.3	187	-	GSX2
chrX	73841535	73841542	MA0910.3	240	-	HOXD8
chrX	73841535	73841542	MA1500.2	191	+	HOXB6
chrX	73841535	73841542	MA1501.2	238	-	HOXB7
chrX	73841535	73841542	MA1502.2	238	-	HOXB8
chrX	73841535	73841542	MA1519.2	234	-	LHX5
chrX	73841535	73841542	MA2093.1	202	-	HOXB1
chrX	73841535	73841542	MA2117.1	270	-	FOXP4
chrX	73841535	73841543	MA0047.4	266	-	FOXA2
chrX	73841535	73841546	MA0847.4	388	-	FOXD2
chrX	73841536	73841545	MA0627.3	360	-	POU2F3
chrX	73841536	73841545	MA0785.2	310	-	POU2F1
chrX	73841536	73841545	MA0789.1	286	-	POU3F4
chrX	73841536	73841545	MA0792.1	308	-	POU5F1B
chrX	73841536	73841546	MA0786.2	312	-	POU3F1
chrX	73841537	73841544	MA1115.2	278	-	POU5F1
chrX	73841538	73841547	MA0070.2	345	-	PBX1
chrX	73841539	73841546	MA2002.2	291	-	Zfp335
chrX	73841540	73841545	MA0006.2	240	+	Ahr::Arnt
chrX	73841540	73841549	MA1581.2	403	+	ZBTB6
chrX	73841542	73841550	MA0836.3	289	-	CEBPD
chrX	73841543	73841549	MA0719.2	171	+	RHOXF1
chrX	73841545	73841553	MA1655.2	285	-	ZNF341
chrX	73841545	73841554	MA1725.2	328	+	ZNF189
chrX	73841546	73841553	MA1496.2	196	+	HOXA4
chrX	73841547	73841553	MA0100.4	265	-	MYB
chrX	73841547	73841556	MA1525.3	259	-	NFATC4
chrX	73841547	73841556	MA1708.2	259	-	ETV7
chrX	73841548	73841557	MA0785.2	280	-	POU2F1
chrX	73841548	73841557	MA0789.1	296	-	POU3F4
chrX	73841548	73841557	MA0792.1	274	-	POU5F1B
chrX	73841548	73841558	MA0786.2	308	-	POU3F1
chrX	73841549	73841555	MA0624.3	291	-	Nfatc1
chrX	73841549	73841555	MA0625.3	313	-	NFATC3
chrX	73841549	73841555	MA0738.2	210	+	HIC2
chrX	73841549	73841555	MA1478.2	208	+	DMRTA2
chrX	73841549	73841556	MA1649.2	336	-	ZBTB12
chrX	73841549	73841557	MA0152.3	311	-	Nfatc2
chrX	73841549	73841559	MA0843.2	274	-	TEF
chrX	73841550	73841556	MA0671.2	197	+	NFIX
chrX	73841551	73841559	MA0461.3	257	+	Atoh1
chrX	73841551	73841561	MA1568.2	251	+	TCF21
chrX	73841551	73841563	MA0790.2	354	+	POU4F1
chrX	73841551	73841563	MA0791.2	353	+	POU4F3
chrX	73841552	73841558	MA1498.3	178	+	HOXA7
chrX	73841552	73841560	MA0095.4	317	-	Yy1
chrX	73841552	73841560	MA0602.2	284	+	Arid5a
chrX	73841552	73841560	MA0602.2	353	-	Arid5a
chrX	73841553	73841560	MA0618.2	222	-	LBX1
chrX	73841553	73841560	MA0710.2	237	+	NOTO
chrX	73841553	73841560	MA0893.3	181	+	GSX2
chrX	73841553	73841560	MA1549.2	230	-	POU6F1
chrX	73841553	73841561	MA0461.3	246	-	Atoh1
chrX	73841554	73841560	MA0630.2	228	-	SHOX
chrX	73841554	73841560	MA0634.2	212	+	ALX3
chrX	73841554	73841560	MA0648.2	243	-	GSC
chrX	73841554	73841560	MA0675.2	210	+	NKX6-2
chrX	73841554	73841560	MA0704.2	204	+	Lhx4
chrX	73841554	73841560	MA0711.2	218	-	OTX1
chrX	73841554	73841560	MA0714.2	233	-	PITX3
chrX	73841554	73841560	MA0720.2	218	+	Shox2
chrX	73841554	73841560	MA0721.2	209	+	UNCX
chrX	73841554	73841560	MA0723.3	180	-	VAX2
chrX	73841554	73841560	MA0723.3	205	+	VAX2
chrX	73841554	73841560	MA0875.2	216	+	BARX1
chrX	73841554	73841560	MA0876.2	202	+	BSX
chrX	73841554	73841560	MA0879.3	205	+	DLX1
chrX	73841554	73841560	MA0881.2	208	+	Dlx4
chrX	73841554	73841560	MA0882.2	210	+	DLX6
chrX	73841554	73841560	MA0886.2	213	+	EMX2
chrX	73841554	73841560	MA0887.2	210	+	EVX1
chrX	73841554	73841560	MA0888.2	198	+	EVX2
chrX	73841554	73841560	MA0891.2	246	-	GSC2
chrX	73841554	73841560	MA0892.2	209	+	GSX1
chrX	73841554	73841560	MA0903.2	210	+	HOXB3
chrX	73841554	73841560	MA1498.3	216	+	HOXA7
chrX	73841554	73841561	MA1497.2	234	-	HOXA6
chrX	73841554	73841564	MA1707.2	248	+	DMRTA1
chrX	73841554	73841565	MA0713.1	307	-	PHOX2A
chrX	73841555	73841561	MA0891.2	202	+	GSC2
chrX	73841555	73841564	MA0785.2	278	-	POU2F1
chrX	73841555	73841564	MA0789.1	287	-	POU3F4
chrX	73841555	73841564	MA0792.1	280	-	POU5F1B
chrX	73841555	73841565	MA0786.2	306	-	POU3F1
chrX	73841555	73841566	MA0492.2	302	+	JUND
chrX	73841555	73841566	MA1127.1	353	+	FOSB::JUN
chrX	73841555	73841566	MA1133.2	336	+	JUN::JUNB
chrX	73841556	73841562	MA0151.1	228	+	Arid3a
chrX	73841556	73841562	MA1478.2	189	+	DMRTA2
chrX	73841556	73841563	MA1115.2	259	-	POU5F1
chrX	73841556	73841564	MA0604.1	261	+	Atf1
chrX	73841556	73841565	MA0025.3	511	-	NFIL3
chrX	73841556	73841565	MA0043.4	471	-	HLF
chrX	73841556	73841565	MA1143.2	309	+	FOSL1::JUND
chrX	73841556	73841565	MA1475.2	268	+	CREB3L4
chrX	73841556	73841566	MA0102.5	446	+	CEBPA
chrX	73841556	73841566	MA0466.4	372	+	CEBPB
chrX	73841556	73841566	MA0466.4	373	-	CEBPB
chrX	73841556	73841566	MA0488.2	402	-	JUN
chrX	73841556	73841566	MA0605.3	342	-	ATF3
chrX	73841556	73841566	MA0605.3	355	+	ATF3
chrX	73841556	73841566	MA0639.2	490	-	DBP
chrX	73841556	73841566	MA0639.2	511	+	DBP
chrX	73841556	73841566	MA0656.2	355	-	JDP2
chrX	73841556	73841566	MA0656.2	389	+	JDP2
chrX	73841556	73841566	MA0833.3	415	-	ATF4
chrX	73841556	73841566	MA0834.2	361	-	ATF7
chrX	73841556	73841566	MA0834.2	362	+	ATF7
chrX	73841556	73841566	MA0837.3	388	-	CEBPE
chrX	73841556	73841566	MA0837.3	389	+	CEBPE
chrX	73841556	73841566	MA0838.1	358	-	CEBPG
chrX	73841556	73841566	MA0838.1	383	+	CEBPG
chrX	73841556	73841566	MA0840.2	389	-	Creb5
chrX	73841556	73841566	MA0840.2	403	+	Creb5
chrX	73841556	73841566	MA0843.2	481	-	TEF
chrX	73841556	73841566	MA0843.2	517	+	TEF
chrX	73841556	73841566	MA1126.2	323	+	FOS::JUN
chrX	73841556	73841566	MA1129.1	383	+	FOSL1::JUN
chrX	73841556	73841566	MA1129.1	384	-	FOSL1::JUN
chrX	73841556	73841566	MA1131.2	356	-	FOSL2::JUN
chrX	73841556	73841566	MA1131.2	369	+	FOSL2::JUN
chrX	73841556	73841566	MA1136.1	355	+	FOSB::JUNB
chrX	73841556	73841566	MA1136.1	379	-	FOSB::JUNB
chrX	73841556	73841566	MA1139.2	385	+	FOSL2::JUNB
chrX	73841556	73841566	MA1139.2	386	-	FOSL2::JUNB
chrX	73841556	73841566	MA1145.2	314	-	FOSL2::JUND
chrX	73841556	73841566	MA1145.2	353	+	FOSL2::JUND
chrX	73841556	73841566	MA1632.2	375	-	ATF2
chrX	73841556	73841566	MA1636.2	467	-	CEBPG
chrX	73841556	73841567	MA0492.2	392	-	JUND
chrX	73841556	73841567	MA1127.1	378	-	FOSB::JUN
chrX	73841556	73841567	MA1133.2	334	-	JUN::JUNB
chrX	73841557	73841564	MA0108.3	245	-	TBP
chrX	73841557	73841565	MA0836.3	347	+	CEBPD
chrX	73841557	73841565	MA0862.1	295	+	GMEB2
chrX	73841557	73841565	MA0862.1	295	-	GMEB2
chrX	73841557	73841566	MA0025.3	324	+	NFIL3
chrX	73841557	73841566	MA0043.4	327	+	HLF
chrX	73841557	73841566	MA1143.2	276	-	FOSL1::JUND
chrX	73841558	73841564	MA0615.2	205	+	Gmeb1
chrX	73841558	73841564	MA0615.2	205	-	Gmeb1
chrX	73841558	73841565	MA0108.3	259	+	TBP
chrX	73841558	73841565	MA0710.2	217	+	NOTO
chrX	73841558	73841566	MA0604.1	240	-	Atf1
chrX	73841559	73841565	MA0723.3	161	-	VAX2
chrX	73841559	73841565	MA0723.3	168	+	VAX2
chrX	73841559	73841565	MA0903.2	183	+	HOXB3
chrX	73841559	73841565	MA1498.3	197	+	HOXA7
chrX	73841559	73841566	MA0084.2	236	+	SRY
chrX	73841559	73841566	MA0601.2	263	+	Arid3b
chrX	73841559	73841568	MA1480.2	424	+	DPRX
chrX	73841561	73841568	MA0035.5	252	+	GATA1
chrX	73841561	73841568	MA1496.2	181	+	HOXA4
chrX	73841561	73841569	MA1547.2	381	+	PITX2
chrX	73841562	73841568	MA0467.3	361	-	Crx
chrX	73841562	73841568	MA0648.2	361	+	GSC
chrX	73841562	73841568	MA0662.2	197	-	MIXL1
chrX	73841562	73841568	MA0662.2	198	+	MIXL1
chrX	73841562	73841568	MA0682.3	361	+	PITX1
chrX	73841562	73841568	MA0705.2	169	-	Lhx8
chrX	73841562	73841568	MA0705.2	187	+	Lhx8
chrX	73841562	73841568	MA0707.3	227	-	MNX1
chrX	73841562	73841568	MA0711.2	361	+	OTX1
chrX	73841562	73841568	MA0714.2	361	+	PITX3
chrX	73841562	73841568	MA0719.2	361	+	RHOXF1
chrX	73841562	73841568	MA0875.2	243	-	BARX1
chrX	73841562	73841568	MA0876.2	219	-	BSX
chrX	73841562	73841568	MA0887.2	219	-	EVX1
chrX	73841562	73841568	MA0888.2	227	-	EVX2
chrX	73841562	73841568	MA0891.2	361	+	GSC2
chrX	73841562	73841568	MA0903.2	195	-	HOXB3
chrX	73841562	73841568	MA1481.2	249	-	DRGX
chrX	73841562	73841569	MA0712.3	391	-	OTX2
chrX	73841562	73841572	MA0883.2	415	-	Dmbx1
chrX	73841563	73841573	MA0483.2	276	+	Gfi1B
chrX	73841564	73841572	MA0692.2	277	-	TFEB
chrX	73841564	73841572	MA1508.2	310	-	IKZF1
chrX	73841565	73841574	MA1725.2	315	+	ZNF189
chrX	73841566	73841572	MA1108.3	225	-	MXI1
chrX	73841566	73841574	MA0692.2	255	+	TFEB
chrX	73841567	73841575	MA1986.2	271	-	ZNF692
chrX	73841568	73841574	MA0719.2	171	+	RHOXF1
chrX	73841568	73841576	MA1142.2	240	-	FOSL1::JUND
chrX	73841569	73841575	MA0625.3	219	-	NFATC3
chrX	73841569	73841575	MA0671.2	190	-	NFIX
chrX	73841569	73841575	MA0738.2	301	+	HIC2
chrX	73841569	73841576	MA0775.2	241	-	MEIS3
chrX	73841569	73841577	MA0739.2	311	+	Hic1
chrX	73841569	73841578	MA0002.3	280	-	Runx1
chrX	73841570	73841575	MA0498.3	197	-	MEIS1
chrX	73841570	73841575	MA0498.3	216	+	MEIS1
chrX	73841570	73841576	MA0670.2	276	+	NFIA
chrX	73841570	73841576	MA0671.2	249	+	NFIX
chrX	73841570	73841576	MA1536.2	179	-	NR2C2
chrX	73841570	73841577	MA1583.2	251	-	ZFP57
chrX	73841570	73841577	MA1583.2	321	+	ZFP57
chrX	73841570	73841580	MA0878.3	311	+	CDX1
chrX	73841571	73841577	MA1478.2	246	+	DMRTA2
chrX	73841571	73841580	MA0899.2	242	+	HOXA10
chrX	73841571	73841580	MA0905.2	230	+	HOXC10
chrX	73841571	73841580	MA0913.3	300	+	HOXD9
chrX	73841571	73841580	MA1473.2	344	+	CDX4
chrX	73841572	73841591	MA0073.2	468	+	RREB1
chrX	73841573	73841580	MA0108.3	224	+	TBP
chrX	73841573	73841580	MA0868.3	259	+	SOX8
chrX	73841573	73841581	MA0867.3	313	+	SOX4
chrX	73841573	73841581	MA1563.2	211	+	SOX18
chrX	73841574	73841580	MA0442.3	246	+	SOX10
chrX	73841574	73841581	MA1152.2	317	-	SOX15
chrX	73841574	73841582	MA1125.2	279	+	ZNF384
chrX	73841574	73841583	MA0593.2	271	+	FOXP2
chrX	73841575	73841581	MA1536.2	153	-	NR2C2
chrX	73841576	73841582	MA0635.2	203	+	BARHL2
chrX	73841576	73841585	MA0629.2	263	-	Rhox11
chrX	73841576	73841585	MA0688.2	252	-	TBX2
chrX	73841576	73841591	MA0113.4	380	-	NR3C1
chrX	73841576	73841591	MA0727.2	372	-	NR3C2
chrX	73841576	73841592	MA0007.4	400	-	Ar
chrX	73841577	73841585	MA0801.1	247	-	MGA
chrX	73841577	73841585	MA0806.1	263	-	TBX4
chrX	73841577	73841585	MA0807.1	299	-	TBX5
chrX	73841577	73841585	MA1515.2	287	+	KLF2
chrX	73841577	73841586	MA1517.2	340	+	KLF6
chrX	73841579	73841588	MA1484.2	263	-	ETS2
chrX	73841579	73841588	MA2327.1	391	+	PGR
chrX	73841579	73841588	MA2327.1	394	-	PGR
chrX	73841580	73841585	MA0006.2	201	-	Ahr::Arnt
chrX	73841580	73841586	MA1536.2	193	-	NR2C2
chrX	73841581	73841591	MA1580.1	357	-	ZBTB32
chrX	73841585	73841593	MA0047.4	282	+	FOXA2
chrX	73841585	73841595	MA1580.1	344	+	ZBTB32
chrX	73841586	73841592	MA0738.2	203	+	HIC2
chrX	73841586	73841593	MA0481.4	258	+	FOXP1
chrX	73841587	73841593	MA1536.2	180	-	NR2C2
chrX	73841587	73841595	MA1534.2	230	+	NR1I3
chrX	73841587	73841595	MA1563.2	237	+	SOX18
chrX	73841588	73841595	MA0143.5	246	+	SOX2
chrX	73841588	73841595	MA1152.2	247	-	SOX15
chrX	73841588	73841596	MA0673.2	196	+	NKX2-8
chrX	73841589	73841596	MA1558.2	244	-	SNAI1
chrX	73841589	73841599	MA0743.3	308	-	SCRT1
chrX	73841590	73841597	MA1558.2	244	+	SNAI1
chrX	73841590	73841598	MA0672.2	236	-	NKX2-3
chrX	73841590	73841598	MA0673.2	209	-	NKX2-8
chrX	73841590	73841598	MA2003.2	251	-	NKX2-4
chrX	73841591	73841598	MA1608.2	289	-	Isl1
chrX	73841591	73841599	MA0158.2	224	-	HOXA5
chrX	73841591	73841600	MA0724.1	245	-	VENTX
chrX	73841592	73841598	MA0892.2	195	-	GSX1
chrX	73841592	73841598	MA0903.2	184	-	HOXB3
chrX	73841592	73841598	MA1504.2	184	-	HOXC4
chrX	73841592	73841599	MA0893.3	228	-	GSX2
chrX	73841592	73841599	MA0910.3	233	-	HOXD8
chrX	73841592	73841599	MA1496.2	180	-	HOXA4
chrX	73841592	73841599	MA1500.2	182	+	HOXB6
chrX	73841592	73841599	MA1502.2	225	-	HOXB8
chrX	73841592	73841601	MA0002.3	263	+	Runx1
chrX	73841593	73841599	MA1478.2	197	-	DMRTA2
chrX	73841594	73841600	MA0130.1	249	-	ZNF354C
chrX	73841594	73841600	MA0671.2	219	-	NFIX
chrX	73841594	73841603	MA1724.2	328	-	Rfx6
chrX	73841595	73841600	MA0498.3	180	-	MEIS1
chrX	73841595	73841602	MA1153.2	259	+	Smad4
chrX	73841595	73841603	MA2341.1	391	-	FEZF2
chrX	73841595	73841604	MA0865.3	316	-	E2F8
chrX	73841595	73841605	MA0599.1	247	-	KLF5
chrX	73841596	73841602	MA1964.2	233	-	SMAD2
chrX	73841596	73841604	MA0471.3	291	+	E2F6
chrX	73841596	73841605	MA0092.2	270	+	Hand1::Tcf3
chrX	73841596	73841605	MA2125.1	541	-	Zfp809
chrX	73841597	73841605	MA0739.2	304	-	Hic1
chrX	73841597	73841607	MA0483.2	276	-	Gfi1B
chrX	73841599	73841605	MA0625.3	235	+	NFATC3
chrX	73841599	73841605	MA0738.2	231	-	HIC2
chrX	73841599	73841605	MA1116.2	246	+	RBPJ
chrX	73841600	73841613	MA1937.2	292	+	ERF::HOXB13
chrX	73841601	73841607	MA0719.2	243	-	RHOXF1
chrX	73841601	73841609	MA0602.2	271	-	Arid5a
chrX	73841602	73841609	MA0893.3	186	+	GSX2
chrX	73841603	73841609	MA0630.2	228	-	SHOX
chrX	73841603	73841609	MA0634.2	212	+	ALX3
chrX	73841603	73841609	MA0648.2	243	-	GSC
chrX	73841603	73841609	MA0675.2	210	+	NKX6-2
chrX	73841603	73841609	MA0704.2	204	+	Lhx4
chrX	73841603	73841609	MA0711.2	218	-	OTX1
chrX	73841603	73841609	MA0714.2	233	-	PITX3
chrX	73841603	73841609	MA0720.2	218	+	Shox2
chrX	73841603	73841609	MA0721.2	209	+	UNCX
chrX	73841603	73841609	MA0723.3	180	-	VAX2
chrX	73841603	73841609	MA0723.3	205	+	VAX2
chrX	73841603	73841609	MA0875.2	216	+	BARX1
chrX	73841603	73841609	MA0876.2	202	+	BSX
chrX	73841603	73841609	MA0879.3	205	+	DLX1
chrX	73841603	73841609	MA0881.2	208	+	Dlx4
chrX	73841603	73841609	MA0882.2	210	+	DLX6
chrX	73841603	73841609	MA0886.2	213	+	EMX2
chrX	73841603	73841609	MA0887.2	210	+	EVX1
chrX	73841603	73841609	MA0888.2	198	+	EVX2
chrX	73841603	73841609	MA0891.2	246	-	GSC2
chrX	73841603	73841609	MA0892.2	209	+	GSX1
chrX	73841603	73841609	MA0903.2	210	+	HOXB3
chrX	73841603	73841609	MA1498.3	216	+	HOXA7
chrX	73841603	73841610	MA1152.2	225	+	SOX15
chrX	73841603	73841612	MA1471.2	219	+	BARX2
chrX	73841603	73841612	MA1480.2	270	-	DPRX
chrX	73841604	73841611	MA0601.2	321	+	Arid3b
chrX	73841604	73841611	MA0868.3	306	-	SOX8
chrX	73841604	73841613	MA1562.2	304	-	SOX14
chrX	73841604	73841613	MA1639.2	301	+	MEIS1
chrX	73841605	73841612	MA0084.2	241	-	SRY
chrX	73841605	73841612	MA0601.2	272	-	Arid3b
chrX	73841605	73841612	MA0909.4	269	-	Hoxd13
chrX	73841605	73841613	MA0476.2	264	-	FOS
chrX	73841605	73841613	MA0489.3	288	-	Jun
chrX	73841605	73841613	MA1142.2	324	+	FOSL1::JUND
chrX	73841605	73841614	MA0099.4	317	-	FOS::JUN
chrX	73841605	73841614	MA0099.4	363	+	FOS::JUN
chrX	73841605	73841614	MA0477.3	337	+	FOSL1
chrX	73841605	73841614	MA0477.3	345	-	FOSL1
chrX	73841605	73841614	MA0490.3	354	+	JUNB
chrX	73841605	73841614	MA0490.3	364	-	JUNB
chrX	73841605	73841614	MA0491.3	342	+	JUND
chrX	73841605	73841614	MA0491.3	352	-	JUND
chrX	73841605	73841614	MA0655.1	326	+	JDP2
chrX	73841605	73841614	MA0655.1	329	-	JDP2
chrX	73841605	73841614	MA1128.2	334	+	FOSL1::JUN
chrX	73841605	73841614	MA1128.2	343	-	FOSL1::JUN
chrX	73841605	73841614	MA1130.2	316	-	FOSL2::JUN
chrX	73841605	73841614	MA1130.2	362	+	FOSL2::JUN
chrX	73841605	73841614	MA1134.2	321	-	FOS::JUNB
chrX	73841605	73841614	MA1134.2	354	+	FOS::JUNB
chrX	73841605	73841614	MA1135.2	314	+	FOSB::JUNB
chrX	73841605	73841614	MA1135.2	369	-	FOSB::JUNB
chrX	73841605	73841614	MA1137.2	322	+	FOSL1::JUNB
chrX	73841605	73841614	MA1137.2	370	-	FOSL1::JUNB
chrX	73841605	73841614	MA1138.2	322	+	FOSL2::JUNB
chrX	73841605	73841614	MA1138.2	381	-	FOSL2::JUNB
chrX	73841605	73841614	MA1141.2	331	-	FOS::JUND
chrX	73841605	73841614	MA1141.2	344	+	FOS::JUND
chrX	73841605	73841614	MA1144.2	310	+	FOSL2::JUND
chrX	73841605	73841614	MA1144.2	366	-	FOSL2::JUND
chrX	73841605	73841614	MA1633.2	328	+	BACH1
chrX	73841605	73841614	MA1633.2	354	-	BACH1
chrX	73841605	73841615	MA0478.2	286	-	FOSL2
chrX	73841605	73841618	MA0046.3	352	-	HNF1A
chrX	73841605	73841618	MA0046.3	380	+	HNF1A
chrX	73841605	73841618	MA0153.2	419	-	HNF1B
chrX	73841606	73841612	MA0891.2	210	+	GSC2
chrX	73841606	73841613	MA0462.3	275	+	BATF::JUN
chrX	73841606	73841613	MA0462.3	278	-	BATF::JUN
chrX	73841606	73841613	MA0674.2	212	+	NKX6-1
chrX	73841606	73841613	MA0835.3	275	+	BATF3
chrX	73841606	73841613	MA0835.3	278	-	BATF3
chrX	73841606	73841613	MA1634.2	275	+	BATF
chrX	73841606	73841613	MA1634.2	279	-	BATF
chrX	73841606	73841613	MA1988.2	270	+	Atf3
chrX	73841606	73841613	MA1988.2	278	-	Atf3
chrX	73841606	73841614	MA0476.2	366	+	FOS
chrX	73841606	73841614	MA0489.3	284	+	Jun
chrX	73841606	73841614	MA1132.2	284	-	JUN::JUNB
chrX	73841606	73841614	MA1142.2	306	-	FOSL1::JUND
chrX	73841606	73841614	MA1563.2	203	-	SOX18
chrX	73841606	73841617	MA0468.1	275	-	DUX4
chrX	73841606	73841618	MA0757.2	380	-	ONECUT3
chrX	73841607	73841613	MA0704.2	214	+	Lhx4
chrX	73841607	73841613	MA0705.2	169	-	Lhx8
chrX	73841607	73841613	MA0705.2	190	+	Lhx8
chrX	73841607	73841613	MA0707.3	198	-	MNX1
chrX	73841607	73841614	MA0033.2	250	-	FOXL1
chrX	73841607	73841614	MA0601.2	246	+	Arid3b
chrX	73841607	73841614	MA1115.2	257	-	POU5F1
chrX	73841607	73841615	MA0756.3	264	-	ONECUT2
chrX	73841607	73841616	MA0679.3	377	-	ONECUT1
chrX	73841607	73841616	MA0754.3	285	-	CUX1
chrX	73841607	73841616	MA1471.2	288	+	BARX2
chrX	73841608	73841615	MA0601.2	228	-	Arid3b
chrX	73841608	73841619	MA0050.4	353	-	Irf1
chrX	73841609	73841616	MA0644.3	205	+	ESX1
chrX	73841609	73841616	MA0710.2	278	+	NOTO
chrX	73841609	73841616	MA0722.2	216	+	VAX1
chrX	73841609	73841616	MA1497.2	205	+	HOXA6
chrX	73841609	73841616	MA1549.2	235	-	POU6F1
chrX	73841609	73841617	MA0158.2	213	-	HOXA5
chrX	73841609	73841618	MA1652.2	349	-	ZKSCAN5
chrX	73841610	73841616	MA0027.3	208	-	EN1
chrX	73841610	73841616	MA0662.2	204	-	MIXL1
chrX	73841610	73841616	MA0675.2	212	+	NKX6-2
chrX	73841610	73841616	MA0704.2	206	+	Lhx4
chrX	73841610	73841616	MA0716.2	209	-	PRRX1
chrX	73841610	73841616	MA0718.2	202	-	RAX
chrX	73841610	73841616	MA0720.2	219	-	Shox2
chrX	73841610	73841616	MA0723.3	209	-	VAX2
chrX	73841610	73841616	MA0723.3	221	+	VAX2
chrX	73841610	73841616	MA0879.3	216	+	DLX1
chrX	73841610	73841616	MA0881.2	209	+	Dlx4
chrX	73841610	73841616	MA0882.2	209	+	DLX6
chrX	73841610	73841616	MA0886.2	240	-	EMX2
chrX	73841610	73841616	MA0887.2	200	+	EVX1
chrX	73841610	73841616	MA0888.2	208	+	EVX2
chrX	73841610	73841616	MA0892.2	213	+	GSX1
chrX	73841610	73841616	MA0900.3	219	+	HOXA2
chrX	73841610	73841616	MA0902.3	188	+	HOXB2
chrX	73841610	73841616	MA0902.3	240	-	HOXB2
chrX	73841610	73841616	MA0903.2	227	+	HOXB3
chrX	73841610	73841616	MA1481.2	195	-	DRGX
chrX	73841610	73841616	MA1498.3	223	+	HOXA7
chrX	73841610	73841616	MA1499.2	225	+	HOXB4
chrX	73841610	73841616	MA1504.2	214	+	HOXC4
chrX	73841610	73841616	MA1507.2	219	+	HOXD4
chrX	73841610	73841617	MA0661.2	218	-	MEOX1
chrX	73841610	73841617	MA0706.2	227	-	MEOX2
chrX	73841610	73841617	MA0893.3	187	-	GSX2
chrX	73841610	73841622	MA0787.1	322	-	POU3F2

## Sheet: Supplemental Table S5
Supplemental Table S5: Full DESeq2 output from XIST OE data
	baseMean	log2FoldChange	lfcSE	stat	pvalue	padj	symbol
ENSG00000000003.16_TSPAN6	985.833	-0.127351	0.0968164	-1.31539	0.18838	0.443505	TSPAN6
ENSG00000000005.6_TNMD	0.668289	-0.246438	2.85004	-0.0864681	0.931094	NA	TNMD
ENSG00000000419.14_DPM1	925.194	0.16413	0.116254	1.41183	0.158	0.39944	DPM1
ENSG00000000457.14_SCYL3	359.609	0.415894	0.133982	3.10412	0.00190848	0.0211078	SCYL3
ENSG00000000460.17_FIRRM	533.341	0.473263	0.121177	3.90556	9.40062e-05	0.00224218	FIRRM
ENSG00000000938.13_FGR	1.02097	0.802975	2.13819	0.37554	0.707259	NA	FGR
ENSG00000000971.17_CFH	2.10736	-1.0942	1.55575	-0.703328	0.481851	NA	CFH
ENSG00000001036.14_FUCA2	2130.84	-0.141421	0.0927366	-1.52497	0.127265	0.35028	FUCA2
ENSG00000001084.13_GCLC	853.21	-0.0659468	0.100794	-0.654273	0.512936	0.758939	GCLC
ENSG00000001167.15_NFYA	1308.81	0.0390271	0.109407	0.356715	0.721305	0.881956	NFYA
ENSG00000001460.18_STPG1	501.458	0.247747	0.136256	1.81824	0.0690268	0.241867	STPG1
ENSG00000001461.17_NIPAL3	1010.62	-0.0908732	0.11424	-0.795456	0.426349	0.689963	NIPAL3
ENSG00000001497.18_LAS1L	2694.33	0.00271452	0.0750307	0.0361788	0.97114	0.990105	LAS1L
ENSG00000001561.7_ENPP4	341.259	-0.0347318	0.148938	-0.233196	0.815609	0.92959	ENPP4
ENSG00000001617.12_SEMA3F	630.91	-0.0747648	0.122783	-0.608919	0.542578	0.778628	SEMA3F
ENSG00000001626.18_CFTR	0.377288	-0.116158	3.81437	-0.0304529	0.975706	NA	CFTR
ENSG00000001629.10_ANKIB1	680.728	-0.132668	0.119244	-1.11258	0.26589	0.540431	ANKIB1
ENSG00000001630.18_CYP51A1	2124.05	-0.184484	0.080535	-2.29073	0.0219791	0.114785	CYP51A1
ENSG00000001631.17_KRIT1	919.141	-0.0668845	0.108085	-0.618816	0.536038	0.77539	KRIT1
ENSG00000002016.18_RAD52	438.149	0.572153	0.136002	4.20696	2.58833e-05	0.0008085	RAD52
ENSG00000002079.15_MYH16	1.51043	2.83667	2.2109	1.28304	0.19948	NA	MYH16
ENSG00000002330.14_BAD	456.358	-0.0141254	0.130043	-0.10862	0.913504	0.96945	BAD
ENSG00000002549.13_LAP3	2320.54	-0.202792	0.0770731	-2.63117	0.00850916	0.0602819	LAP3
ENSG00000002586.20_CD99	1976.35	-0.147869	0.0790059	-1.87162	0.0612588	0.224345	CD99
ENSG00000002587.10_HS3ST1	0	NA	NA	NA	NA	NA	HS3ST1
ENSG00000002726.21_AOC1	0.821285	0.494929	2.31364	0.213918	0.830611	NA	AOC1
ENSG00000002745.13_WNT16	1.02808	-0.24185	2.23591	-0.108166	0.913864	NA	WNT16
ENSG00000002746.15_HECW1	67.5047	-0.10013	0.299266	-0.334586	0.737937	0.891291	HECW1
ENSG00000002822.16_MAD1L1	1512.71	0.160233	0.0940752	1.70324	0.0885233	0.282246	MAD1L1
ENSG00000002834.19_LASP1	2048.31	-0.0870803	0.0886396	-0.982409	0.325899	0.602301	LASP1
ENSG00000002919.15_SNX11	316.361	0.398339	0.149325	2.6676	0.00763945	0.0560449	SNX11
ENSG00000002933.9_TMEM176A	0.14321	-1.07794	4.08047	-0.26417	0.791649	NA	TMEM176A
ENSG00000003056.8_M6PR	1315.67	-0.0241145	0.0885026	-0.272473	0.785259	0.91678	M6PR
ENSG00000003096.15_KLHL13	489.842	0.150413	0.124389	1.20921	0.226581	0.494241	KLHL13
ENSG00000003137.9_CYP26B1	157.78	0.0355953	0.186577	0.190781	0.848697	0.94333	CYP26B1
ENSG00000003147.19_ICA1	206.845	0.00657956	0.18662	0.0352564	0.971875	0.990279	ICA1
ENSG00000003249.15_DBNDD1	1204.42	-0.183151	0.0989763	-1.85045	0.0642487	0.231379	DBNDD1
ENSG00000003393.16_ALS2	1423.18	0.0955442	0.0906486	1.05401	0.29188	0.567897	ALS2
ENSG00000003400.16_CASP10	162.148	0.0725423	0.185495	0.391074	0.695742	0.868538	CASP10
ENSG00000003402.21_CFLAR	564.956	0.0166974	0.114658	0.145628	0.884215	0.957723	CFLAR
ENSG00000003436.16_TFPI	194.681	-0.238552	0.182035	-1.31047	0.190037	0.445998	TFPI
ENSG00000003509.16_NDUFAF7	480.591	0.0279655	0.136609	0.204713	0.837797	0.938843	NDUFAF7
ENSG00000003756.17_RBM5	2395.82	0.307815	0.116835	2.63462	0.00842324	0.0598607	RBM5
ENSG00000003987.14_MTMR7	64.0816	0.169191	0.32686	0.517626	0.604719	0.816518	MTMR7
ENSG00000003989.18_SLC7A2	1655.65	-0.229353	0.0955039	-2.4015	0.0163279	0.0941647	SLC7A2
ENSG00000004059.11_ARF5	1926.15	-0.131348	0.0858309	-1.53031	0.12594	0.348225	ARF5
ENSG00000004139.14_SARM1	490.778	-0.329993	0.12371	-2.66748	0.00764232	0.0560449	SARM1
ENSG00000004142.12_POLDIP2	3729.21	0.0490839	0.0745027	0.65882	0.510011	0.757557	POLDIP2
ENSG00000004399.13_PLXND1	1916.31	-0.260419	0.0787488	-3.30696	0.000943146	0.0124731	PLXND1
ENSG00000004455.18_AK2	10291.3	-0.0887675	0.0613738	-1.44634	0.148081	0.385057	AK2
ENSG00000004468.13_CD38	11.6733	0.301197	0.665034	0.452905	0.650617	NA	CD38
ENSG00000004478.8_FKBP4	5189.35	-0.0112905	0.0788865	-0.143123	0.886193	0.958822	FKBP4
ENSG00000004487.18_KDM1A	4987.41	0.0162026	0.0760968	0.212921	0.831389	0.935312	KDM1A
ENSG00000004534.15_RBM6	1915.15	0.361508	0.108034	3.34625	0.000819115	0.0112633	RBM6
ENSG00000004660.15_CAMKK1	724.786	0.125228	0.099465	1.25902	0.208023	0.469822	CAMKK1
ENSG00000004700.16_RECQL	979.874	-0.0519758	0.107417	-0.48387	0.628478	0.829982	RECQL
ENSG00000004766.17_VPS50	467.968	0.139543	0.124409	1.12165	0.262012	0.536124	VPS50
ENSG00000004776.13_HSPB6	14.2505	-0.374031	0.628916	-0.594724	0.552028	NA	HSPB6
ENSG00000004777.19_ARHGAP33	491.253	0.503826	0.132887	3.7914	0.000149803	0.00316814	ARHGAP33
ENSG00000004779.10_NDUFAB1	833.297	0.101201	0.105647	0.957914	0.338106	0.611354	NDUFAB1
ENSG00000004799.8_PDK4	44.4724	-0.0173446	0.327024	-0.0530378	0.957702	0.985353	PDK4
ENSG00000004809.14_SLC22A16	0	NA	NA	NA	NA	NA	SLC22A16
ENSG00000004838.14_ZMYND10	32.1688	-0.277705	0.471263	-0.589277	0.555675	0.785614	ZMYND10
ENSG00000004846.17_ABCB5	2.45132	0.957111	1.48035	0.646542	0.517928	NA	ABCB5
ENSG00000004848.8_ARX	1.21535	-2.63537	2.31177	-1.13998	0.254295	NA	ARX
ENSG00000004864.14_SLC25A13	1413.42	-0.0648578	0.0837713	-0.774225	0.438798	0.700966	SLC25A13
ENSG00000004866.22_ST7	422.958	0.203752	0.119681	1.70247	0.0886681	0.282463	ST7
ENSG00000004897.12_CDC27	2768.83	0.158251	0.0842435	1.8785	0.0603134	0.222393	CDC27
ENSG00000004939.16_SLC4A1	4.1332	-0.107767	1.06427	-0.101259	0.919345	NA	SLC4A1
ENSG00000004948.16_CALCR	6.74148	-0.765709	0.844521	-0.906678	0.364577	NA	CALCR
ENSG00000004961.15_HCCS	780.149	0.334795	0.0983211	3.40511	0.000661364	0.00967172	HCCS
ENSG00000004975.12_DVL2	1842.92	-0.148904	0.105448	-1.41211	0.157917	0.39944	DVL2
ENSG00000005001.10_PRSS22	0.802826	1.74302	2.6542	0.656702	0.511373	NA	PRSS22
ENSG00000005007.14_UPF1	5350	0.0177818	0.0689876	0.257754	0.796597	0.921494	UPF1
ENSG00000005020.13_SKAP2	1027.79	-0.210515	0.0951831	-2.21168	0.0269885	0.132685	SKAP2
ENSG00000005022.6_SLC25A5	11516.9	-0.176293	0.0661737	-2.6641	0.00771949	0.0564445	SLC25A5
ENSG00000005059.16_MCUB	363.227	0.0108552	0.134554	0.0806753	0.9357	0.978155	MCUB
ENSG00000005073.6_HOXA11	692.715	0.120591	0.102544	1.17599	0.239599	0.510552	HOXA11
ENSG00000005075.16_POLR2J	1328.55	0.0538953	0.0950966	0.566742	0.570889	0.795872	POLR2J
ENSG00000005100.13_DHX33	2202.3	0.111454	0.0757277	1.47178	0.141081	0.375116	DHX33
ENSG00000005102.14_MEOX1	24.0201	0.000826062	0.483642	0.001708	0.998637	0.999839	MEOX1
ENSG00000005108.17_THSD7A	8.19962	-0.499463	0.788857	-0.633148	0.526637	NA	THSD7A
ENSG00000005156.12_LIG3	2120	-0.137425	0.0901849	-1.52381	0.127556	0.350808	LIG3
ENSG00000005175.10_RPAP3	1406.65	0.0309983	0.0889958	0.348312	0.727606	0.885574	RPAP3
ENSG00000005187.12_ACSM3	101.939	-0.232847	0.24196	-0.962336	0.335881	0.609685	ACSM3
ENSG00000005189.20_REXO5	325.145	0.43168	0.149279	2.89177	0.00383077	0.0349403	REXO5
ENSG00000005194.15_CIAPIN1	1086.32	0.11885	0.105585	1.12564	0.26032	0.534714	CIAPIN1
ENSG00000005206.17_SPPL2B	1208.85	-0.0563938	0.104354	-0.54041	0.588914	0.807446	SPPL2B
ENSG00000005238.20_ATOSB	111.765	0.479856	0.225417	2.12875	0.0332751	0.152544	ATOSB
ENSG00000005243.10_COPZ2	8.11979	0.629571	0.769556	0.818096	0.413303	NA	COPZ2
ENSG00000005249.14_PRKAR2B	517.774	-0.212783	0.116397	-1.82807	0.0675383	0.239074	PRKAR2B
ENSG00000005302.19_MSL3	839.739	-0.0386337	0.112099	-0.344638	0.730366	0.887026	MSL3
ENSG00000005339.15_CREBBP	4203.81	0.0227649	0.0752907	0.302361	0.762377	0.903541	CREBBP
ENSG00000005379.17_TSPOAP1	0.663858	-0.346846	2.85752	-0.12138	0.90339	NA	TSPOAP1
ENSG00000005381.9_MPO	0.159144	0.845613	4.08047	0.207234	0.835827	NA	MPO
ENSG00000005421.9_PON1	0.141643	0.845613	4.08047	0.207234	0.835827	NA	PON1
ENSG00000005436.14_GCFC2	785.074	0.18496	0.112956	1.63745	0.101537	0.305825	GCFC2
ENSG00000005448.17_WDR54	498.157	-0.38555	0.135351	-2.84853	0.00439224	0.0382393	WDR54
ENSG00000005469.12_CROT	147.741	0.0141375	0.200502	0.0705107	0.943787	0.980019	CROT
ENSG00000005471.19_ABCB4	88.8966	-0.0152328	0.240493	-0.0633399	0.949496	0.98246	ABCB4
ENSG00000005483.23_KMT2E	2073.1	0.301063	0.0877065	3.43262	0.000597768	0.00904889	KMT2E
ENSG00000005486.17_RHBDD2	1246.73	0.342203	0.138252	2.47521	0.0133157	0.0821893	RHBDD2
ENSG00000005513.11_SOX8	667.254	-0.0704609	0.101937	-0.691217	0.489429	0.741806	SOX8
ENSG00000005700.15_IBTK	990.933	-0.147055	0.104558	-1.40645	0.15959	0.401233	IBTK
ENSG00000005801.18_ZNF195	849.237	0.261725	0.101282	2.58412	0.00976265	0.0662874	ZNF195
ENSG00000005810.20_MYCBP2	5496.11	0.289364	0.0873648	3.31213	0.000925869	0.0122991	MYCBP2
ENSG00000005812.11_FBXL3	1511.54	0.0648303	0.0894479	0.724783	0.468585	0.725547	FBXL3
ENSG00000005844.19_ITGAL	22.104	-0.166745	0.49226	-0.338733	0.734811	0.889457	ITGAL
ENSG00000005882.12_PDK2	880.72	-0.132398	0.102432	-1.29255	0.196168	0.453896	PDK2
ENSG00000005884.18_ITGA3	351.464	-0.346158	0.144763	-2.3912	0.0167933	0.0958486	ITGA3
ENSG00000005889.16_ZFX	1052.05	0.0638892	0.102981	0.620398	0.534996	0.774709	ZFX
ENSG00000005893.17_LAMP2	2130.4	-0.266348	0.0928291	-2.86922	0.00411479	0.0368333	LAMP2
ENSG00000005961.19_ITGA2B	192.809	-0.405759	0.166997	-2.42973	0.01511	0.0892083	ITGA2B
ENSG00000005981.13_ASB4	0.784028	-0.676962	2.48568	-0.272344	0.785357	NA	ASB4
ENSG00000006007.12_GDE1	1714.78	-0.0581142	0.0823371	-0.705808	0.480308	0.734481	GDE1
ENSG00000006015.18_REX1BD	475.707	-0.285498	0.119142	-2.39628	0.0165626	0.0948991	REX1BD
ENSG00000006016.12_CRLF1	232.774	-0.549609	0.187142	-2.93686	0.00331552	0.0313429	CRLF1
ENSG00000006025.13_OSBPL7	160.514	-0.00039985	0.191599	-0.00208691	0.998335	0.999839	OSBPL7
ENSG00000006042.12_TMEM98	722.738	0.0143399	0.117202	0.122352	0.90262	0.965698	TMEM98
ENSG00000006047.13_YBX2	2.27204	-0.85392	1.4517	-0.58822	0.556385	NA	YBX2
ENSG00000006059.4_KRT33A	0	NA	NA	NA	NA	NA	KRT33A
ENSG00000006062.18_MAP3K14	305.009	1.03491	0.15743	6.57381	4.90437e-11	1.20045e-08	MAP3K14
ENSG00000006071.16_ABCC8	182.457	0.0780418	0.180047	0.433452	0.664687	0.851266	ABCC8
ENSG00000006116.4_CACNG3	0	NA	NA	NA	NA	NA	CACNG3
ENSG00000006118.15_TMEM132A	1152.93	-0.34749	0.101166	-3.43486	0.00059286	0.00900508	TMEM132A
ENSG00000006125.18_AP2B1	5413.05	-0.163669	0.0722093	-2.26659	0.0234154	0.12008	AP2B1
ENSG00000006128.12_TAC1	0	NA	NA	NA	NA	NA	TAC1
ENSG00000006194.11_ZNF263	927.249	-0.00060866	0.0978938	-0.00621755	0.995039	0.998989	ZNF263
ENSG00000006210.7_CX3CL1	14.1792	0.746716	0.609201	1.22573	0.220301	NA	CX3CL1
ENSG00000006282.22_SPATA20	510.537	0.0818102	0.122651	0.667015	0.504763	0.753591	SPATA20
ENSG00000006283.18_CACNA1G	146.377	0.0116131	0.211634	0.0548736	0.956239	0.984934	CACNA1G
ENSG00000006327.14_TNFRSF12A	221.232	0.314731	0.172755	1.82184	0.0684799	0.240638	TNFRSF12A
ENSG00000006377.11_DLX6	164.545	-0.0779707	0.220013	-0.354391	0.723046	0.882731	DLX6
ENSG00000006432.16_MAP3K9	521.333	0.425474	0.121544	3.50057	0.00046426	0.00748581	MAP3K9
ENSG00000006451.8_RALA	844.591	0.0132143	0.106057	0.124596	0.900843	0.964653	RALA
ENSG00000006453.14_BAIAP2L1	1091.32	-0.26141	0.0996562	-2.62311	0.00871299	0.0611874	BAIAP2L1
ENSG00000006459.11_KDM7A	1154.58	0.000355917	0.0977584	0.00364078	0.997095	0.999371	KDM7A
ENSG00000006468.15_ETV1	40.7504	0.424276	0.358402	1.1838	0.236493	0.506465	ETV1
ENSG00000006530.18_AGK	1978.93	-0.132101	0.0776393	-1.70147	0.0888543	0.282935	AGK
ENSG00000006534.17_ALDH3B1	51.1649	-0.638089	0.327235	-1.94994	0.051183	0.20095	ALDH3B1
ENSG00000006555.11_TTC22	0.66172	2.78418	2.77563	1.00308	0.315823	NA	TTC22
ENSG00000006576.17_PHTF2	755.186	0.208656	0.111275	1.87514	0.0607732	0.223443	PHTF2
ENSG00000006606.9_CCL26	1.00347	0.77201	2.14695	0.359585	0.719158	NA	CCL26
ENSG00000006607.14_FARP2	1342.7	-0.0388703	0.0852252	-0.45609	0.648325	0.84236	FARP2
ENSG00000006611.17_USH1C	569.999	-0.135541	0.145267	-0.933044	0.350797	0.62301	USH1C
ENSG00000006625.18_GGCT	1536.59	-0.0783309	0.0845893	-0.926014	0.354439	0.626411	GGCT
ENSG00000006634.8_DBF4	1083.75	0.227118	0.109834	2.06783	0.0386556	0.168856	DBF4
ENSG00000006638.13_TBXA2R	110.009	-0.114754	0.234272	-0.48983	0.624254	0.826949	TBXA2R
ENSG00000006652.15_IFRD1	1588.62	-0.340282	0.0874065	-3.8931	9.89733e-05	0.00234567	IFRD1
ENSG00000006659.13_LGALS14	0	NA	NA	NA	NA	NA	LGALS14
ENSG00000006695.12_COX10	774.191	0.0358703	0.097775	0.366866	0.713719	0.878198	COX10
ENSG00000006704.11_GTF2IRD1	1118.94	0.0795019	0.104986	0.757259	0.448895	0.708839	GTF2IRD1
ENSG00000006712.15_PAF1	2638.65	0.0662322	0.0875084	0.756866	0.44913	0.708839	PAF1
ENSG00000006715.16_VPS41	835.027	-0.10151	0.0971234	-1.04517	0.295945	0.572081	VPS41
ENSG00000006740.18_ARHGAP44	386.822	-0.079271	0.147624	-0.536979	0.591282	0.808539	ARHGAP44
ENSG00000006744.19_ELAC2	3279.15	0.0496452	0.0744983	0.666393	0.50516	0.753651	ELAC2
ENSG00000006747.15_SCIN	7.95986	0.0397085	0.803407	0.0494251	0.96058	NA	SCIN
ENSG00000006756.16_ARSD	0.983714	-0.161993	2.13793	-0.0757707	0.939602	NA	ARSD
ENSG00000006757.12_PNPLA4	326.168	0.207645	0.142796	1.45414	0.145908	0.382199	PNPLA4
ENSG00000006788.14_MYH13	0.705966	-1.69589	2.78259	-0.609463	0.542218	NA	MYH13
ENSG00000006831.10_ADIPOR2	2811.73	0.124258	0.078386	1.58521	0.11292	0.325672	ADIPOR2
ENSG00000006837.12_CDKL3	36.922	0.954599	0.38623	2.47158	0.0134516	0.0826513	CDKL3
ENSG00000007001.14_UPP2	0	NA	NA	NA	NA	NA	UPP2
ENSG00000007038.11_PRSS21	0	NA	NA	NA	NA	NA	PRSS21
ENSG00000007047.16_MARK4	1169.49	-0.437613	0.112835	-3.87835	0.000105168	0.00246122	MARK4
ENSG00000007062.12_PROM1	1.96329	0.774619	1.75772	0.440697	0.659433	NA	PROM1
ENSG00000007080.11_CCDC124	3844.07	-0.0673776	0.0806373	-0.835564	0.4034	0.670249	CCDC124
ENSG00000007129.18_CEACAM21	3.95216	0.073368	1.09637	0.0669192	0.946646	NA	CEACAM21
ENSG00000007168.15_PAFAH1B1	2848.87	0.0138196	0.0750362	0.184172	0.853878	0.94572	PAFAH1B1
ENSG00000007171.19_NOS2	356.92	-0.0499823	0.159084	-0.314188	0.753378	0.897922	NOS2
ENSG00000007174.18_DNAH9	0	NA	NA	NA	NA	NA	DNAH9
ENSG00000007202.16_BLTP2	6549.59	-0.234258	0.0681946	-3.43514	0.000592257	0.00900508	BLTP2
ENSG00000007216.16_SLC13A2	0	NA	NA	NA	NA	NA	SLC13A2
ENSG00000007237.19_GAS7	324.013	-0.506794	0.181412	-2.79361	0.00521231	0.0433783	GAS7
ENSG00000007255.10_TRAPPC6A	251.615	-0.827795	0.193652	-4.27465	1.91442e-05	0.000633796	TRAPPC6A
ENSG00000007264.15_MATK	794.778	-0.466949	0.110374	-4.2306	2.33066e-05	0.000749981	MATK
ENSG00000007306.15_CEACAM7	0.711932	-0.265248	3.0118	-0.0880696	0.929821	NA	CEACAM7
ENSG00000007312.14_CD79B	2.41953	-0.205429	1.39898	-0.146843	0.883256	NA	CD79B
ENSG00000007314.12_SCN4A	200.292	-0.398339	0.203455	-1.95787	0.050245	0.198475	SCN4A
ENSG00000007341.19_ST7L	634.231	0.585274	0.104716	5.58918	2.28146e-08	2.58064e-06	ST7L
ENSG00000007350.18_TKTL1	12.2172	-1.02914	0.656412	-1.56783	0.11692	NA	TKTL1
ENSG00000007372.25_PAX6	991.476	0.0901789	0.0911167	0.989708	0.322317	0.598548	PAX6
ENSG00000007376.8_RPUSD1	1358.95	-0.206015	0.0899158	-2.2912	0.021952	0.114724	RPUSD1
ENSG00000007384.15_RHBDF1	432.763	0.326842	0.121833	2.6827	0.00730299	0.0546845	RHBDF1
ENSG00000007392.17_LUC7L	985.852	0.490401	0.156241	3.13874	0.00169677	0.0194283	LUC7L
ENSG00000007402.12_CACNA2D2	608.182	-0.315875	0.113019	-2.79488	0.00519184	0.0432388	CACNA2D2
ENSG00000007516.15_BAIAP3	233.444	0.00729478	0.160723	0.0453874	0.963799	0.987543	BAIAP3
ENSG00000007520.4_TSR3	973.669	-0.150906	0.107359	-1.40561	0.159839	0.401375	TSR3
ENSG00000007541.17_PIGQ	936.175	-0.346824	0.0984423	-3.52312	0.000426497	0.00699783	PIGQ
ENSG00000007545.16_CRAMP1	1228.3	-0.0252285	0.093213	-0.270654	0.786657	0.917005	CRAMP1
ENSG00000007866.22_TEAD3	425.861	-0.0915164	0.133471	-0.685667	0.492923	0.744697	TEAD3
ENSG00000007908.16_SELE	0.183751	-1.07794	4.08047	-0.26417	0.791649	NA	SELE
ENSG00000007923.17_DNAJC11	3315.37	0.148806	0.0737096	2.01881	0.0435069	0.181707	DNAJC11
ENSG00000007933.13_FMO3	0.14321	-1.07794	4.08047	-0.26417	0.791649	NA	FMO3
ENSG00000007944.15_MYLIP	308.898	-0.133572	0.146973	-0.908817	0.363447	0.634418	MYLIP
ENSG00000007952.18_NOX1	0.443997	0.711268	3.28772	0.216341	0.828722	NA	NOX1
ENSG00000007968.7_E2F2	1177.84	0.0125795	0.110693	0.113643	0.909521	0.967912	E2F2
ENSG00000008018.9_PSMB1	3639.07	-0.0340028	0.0713796	-0.476365	0.633814	0.833171	PSMB1
ENSG00000008056.14_SYN1	31.9699	1.06064	0.395131	2.68427	0.00726892	0.0545114	SYN1
ENSG00000008083.14_JARID2	2061.6	0.0412006	0.0775954	0.530967	0.595442	0.811255	JARID2
ENSG00000008086.13_CDKL5	268.471	0.222776	0.149977	1.4854	0.137437	0.368284	CDKL5
ENSG00000008118.10_CAMK1G	20.3895	-0.212851	0.529409	-0.402053	0.687645	NA	CAMK1G
ENSG00000008128.23_CDK11A	1208.47	0.394383	0.118498	3.32817	0.000874192	0.0118123	CDK11A
ENSG00000008130.15_NADK	1957.72	-0.149487	0.0934995	-1.5988	0.109866	0.319822	NADK
ENSG00000008196.13_TFAP2B	0	NA	NA	NA	NA	NA	TFAP2B
ENSG00000008197.5_TFAP2D	0	NA	NA	NA	NA	NA	TFAP2D
ENSG00000008226.20_DLEC1	18.2429	-0.162145	0.563533	-0.287729	0.773554	NA	DLEC1
ENSG00000008256.17_CYTH3	1335.64	-0.133622	0.0859498	-1.55465	0.12003	0.33796	CYTH3
ENSG00000008277.15_ADAM22	456.608	-0.215362	0.134687	-1.59898	0.109825	0.319822	ADAM22
ENSG00000008282.10_SYPL1	588.646	-0.111045	0.125532	-0.884594	0.376376	0.646334	SYPL1
ENSG00000008283.16_CYB561	272.958	-0.0460094	0.165898	-0.277336	0.781522	0.914205	CYB561
ENSG00000008294.22_SPAG9	3515.38	0.022427	0.0830224	0.270132	0.787058	0.917017	SPAG9
ENSG00000008300.17_CELSR3	1100.01	0.23953	0.103738	2.30898	0.0209448	0.111048	CELSR3
ENSG00000008311.16_AASS	754.388	0.00191227	0.118405	0.0161503	0.987114	0.996394	AASS
ENSG00000008323.16_PLEKHG6	3.7179	0.690001	1.15073	0.599621	0.548759	NA	PLEKHG6
ENSG00000008324.12_SS18L2	155.951	-0.118263	0.188913	-0.626019	0.531303	0.771989	SS18L2
ENSG00000008382.16_MPND	243.427	-0.416541	0.167405	-2.48823	0.012838	0.0797909	MPND
ENSG00000008394.13_MGST1	264.641	-0.06439	0.168241	-0.382724	0.701924	0.871989	MGST1
ENSG00000008405.12_CRY1	858.991	0.021757	0.10072	0.216013	0.828977	0.934946	CRY1
ENSG00000008438.5_PGLYRP1	0.14321	-1.07794	4.08047	-0.26417	0.791649	NA	PGLYRP1
ENSG00000008441.19_NFIX	1911.33	-0.107204	0.0797993	-1.34343	0.179134	0.42925	NFIX
ENSG00000008513.17_ST3GAL1	626.183	-0.506079	0.1365	-3.70753	0.00020929	0.00403214	ST3GAL1
ENSG00000008516.18_MMP25	19.3725	-0.253019	0.49874	-0.507318	0.611932	NA	MMP25
ENSG00000008517.19_IL32	25.8837	-0.0400279	0.436933	-0.091611	0.927007	0.974926	IL32
ENSG00000008710.20_PKD1	3038.73	-0.237009	0.0764453	-3.10038	0.00193274	0.0212815	PKD1
ENSG00000008735.14_MAPK8IP2	1176.23	-0.0792264	0.133342	-0.594161	0.552404	0.783953	MAPK8IP2
ENSG00000008838.21_MED24	2896.42	-0.338746	0.0726215	-4.66454	3.09304e-06	0.000142979	MED24
ENSG00000008853.18_RHOBTB2	492.095	0.00466605	0.126761	0.0368098	0.970637	0.989987	RHOBTB2
ENSG00000008869.12_HEATR5B	913.896	0.0693958	0.0993855	0.698249	0.485022	0.738245	HEATR5B
ENSG00000008952.17_SEC62	2826.21	-0.00998326	0.0771394	-0.129418	0.897027	0.962637	SEC62
ENSG00000008988.11_RPS20	7604.85	-0.257152	0.089811	-2.86325	0.00419315	0.0372427	RPS20
ENSG00000009307.17_CSDE1	20582.1	-0.215604	0.0628149	-3.43237	0.000598341	0.00904889	CSDE1
ENSG00000009335.19_UBE3C	3832.55	-0.0117317	0.0725278	-0.161754	0.871499	0.953136	UBE3C
ENSG00000009413.17_REV3L	1367.07	0.0949076	0.103389	0.917968	0.358636	0.630139	REV3L
ENSG00000009694.14_TENM1	1527.66	-0.634357	0.143199	-4.42988	9.42838e-06	0.000348233	TENM1
ENSG00000009709.13_PAX7	55.2648	-0.166787	0.328323	-0.507997	0.611455	0.819831	PAX7
ENSG00000009724.18_MASP2	5.78972	0.194647	0.961086	0.202528	0.839504	NA	MASP2
ENSG00000009765.15_IYD	0	NA	NA	NA	NA	NA	IYD
ENSG00000009780.16_FAM76A	504.1	0.166797	0.115514	1.44395	0.148753	0.385904	FAM76A
ENSG00000009790.15_TRAF3IP3	0.367502	-2.05082	4.03189	-0.50865	0.610997	NA	TRAF3IP3
ENSG00000009830.13_POMT2	1072.71	-0.00614217	0.0954501	-0.0643496	0.948692	0.98205	POMT2
ENSG00000009844.16_VTA1	1770.33	0.135603	0.0848012	1.59907	0.109805	0.319822	VTA1
ENSG00000009950.16_MLXIPL	960.884	-0.0600796	0.110546	-0.54348	0.586799	0.806026	MLXIPL
ENSG00000009954.11_BAZ1B	7399.32	0.0759331	0.0705904	1.07569	0.282068	0.558118	BAZ1B
ENSG00000010017.13_RANBP9	1500.83	0.0930626	0.085201	1.09227	0.274714	0.549686	RANBP9
ENSG00000010030.14_ETV7	6.29639	1.78037	0.937116	1.89984	0.0574545	NA	ETV7
ENSG00000010072.16_SPRTN	1026.25	0.336755	0.0942503	3.57298	0.000352936	0.00603715	SPRTN
ENSG00000010165.20_METTL13	1011.87	-0.000587018	0.0934608	-0.0062809	0.994989	0.998989	METTL13
ENSG00000010219.14_DYRK4	299.262	-0.0449991	0.14184	-0.317253	0.751052	0.896952	DYRK4
ENSG00000010244.19_ZNF207	3632.32	0.256056	0.122566	2.08914	0.0366956	0.163094	ZNF207
ENSG00000010256.12_UQCRC1	4618.48	-0.214635	0.0838581	-2.5595	0.0104822	0.0691493	UQCRC1
ENSG00000010270.14_STARD3NL	539.452	-0.0150049	0.118583	-0.126534	0.899309	0.96414	STARD3NL
ENSG00000010278.15_CD9	572.587	0.0460185	0.123658	0.372144	0.709786	0.876833	CD9
ENSG00000010282.15_HHATL	0.79243	0.260623	2.87748	0.0905733	0.927832	NA	HHATL
ENSG00000010292.13_NCAPD2	6114.18	-0.0831805	0.0789081	-1.05414	0.291817	0.567851	NCAPD2
ENSG00000010295.20_IFFO1	892.097	0.259769	0.0972595	2.67088	0.00756521	0.0557407	IFFO1
ENSG00000010310.9_GIPR	119.943	-0.207581	0.216797	-0.957491	0.338319	0.611481	GIPR
ENSG00000010318.22_PHF7	154.464	-0.327313	0.198479	-1.64911	0.0991251	0.301495	PHF7
ENSG00000010319.7_SEMA3G	308.784	0.0385973	0.162691	0.237243	0.812468	0.928082	SEMA3G
ENSG00000010322.16_NISCH	2029.75	0.0746421	0.0815041	0.915809	0.359767	0.631177	NISCH
ENSG00000010327.10_STAB1	18.8278	-0.349031	0.527311	-0.661908	0.50803	NA	STAB1
ENSG00000010361.14_FUZ	889.988	-0.326652	0.155918	-2.09503	0.0361685	0.1613	FUZ
ENSG00000010379.16_SLC6A13	10.8789	0.876552	0.723137	1.21215	0.225454	NA	SLC6A13
ENSG00000010404.18_IDS	1395.84	-0.275253	0.0964751	-2.8531	0.00432953	0.0378366	IDS
ENSG00000010438.17_PRSS3	0.28642	-1.74118	4.06107	-0.42875	0.668105	NA	PRSS3
ENSG00000010539.12_ZNF200	467.051	0.710509	0.131503	5.40297	6.55469e-08	6.07876e-06	ZNF200
ENSG00000010610.10_CD4	4.39188	-0.235553	1.02029	-0.230869	0.817416	NA	CD4
ENSG00000010626.15_LRRC23	193.797	-0.201032	0.198532	-1.01259	0.311256	0.587189	LRRC23
ENSG00000010671.18_BTK	21.9066	0.847878	0.489609	1.73175	0.0833189	0.271875	BTK
ENSG00000010704.20_HFE	13.7051	0.289691	0.645373	0.448873	0.653523	NA	HFE
ENSG00000010803.17_SCMH1	1078.29	0.0251636	0.098809	0.254669	0.798979	0.921906	SCMH1
ENSG00000010810.18_FYN	1919.48	-0.278301	0.0878768	-3.16694	0.00154051	0.0180403	FYN
ENSG00000010818.11_HIVEP2	981.088	0.123353	0.0917543	1.34438	0.178826	0.428854	HIVEP2
ENSG00000010932.17_FMO1	0.689611	-0.176054	2.82004	-0.0624298	0.950221	NA	FMO1
ENSG00000011007.13_ELOA	2397.67	0.0330007	0.0833441	0.395957	0.692137	0.866707	ELOA
ENSG00000011009.12_LYPLA2	818.68	-0.0869549	0.107265	-0.810656	0.417563	0.68231	LYPLA2
ENSG00000011021.23_CLCN6	483.995	0.130073	0.125336	1.0378	0.299365	0.576304	CLCN6
ENSG00000011028.14_MRC2	1033.66	-0.53088	0.1376	-3.85813	0.000114258	0.00260816	MRC2
ENSG00000011052.21_NME1-NME2	158.886	0.11351	0.202278	0.561158	0.57469	0.798947	NME1-NME2
ENSG00000011083.9_SLC6A7	0	NA	NA	NA	NA	NA	SLC6A7
ENSG00000011105.14_TSPAN9	614.375	-0.0665711	0.133732	-0.497795	0.618629	0.82322	TSPAN9
ENSG00000011114.15_BTBD7	1129.82	-0.0133544	0.0902694	-0.147939	0.882391	0.956894	BTBD7
ENSG00000011132.12_APBA3	458.317	-0.0526019	0.118237	-0.444886	0.656402	0.846789	APBA3
ENSG00000011143.19_MKS1	812.022	-0.242086	0.103879	-2.33046	0.0197819	0.106861	MKS1
ENSG00000011198.10_ABHD5	221.081	0.00878369	0.159214	0.0551692	0.956004	0.98476	ABHD5
ENSG00000011201.12_ANOS1	0	NA	NA	NA	NA	NA	ANOS1
ENSG00000011243.19_AKAP8L	3497.15	0.284017	0.0713016	3.98332	6.79588e-05	0.00173452	AKAP8L
ENSG00000011258.16_MBTD1	765.253	-0.174034	0.111569	-1.55988	0.118789	0.335484	MBTD1
ENSG00000011260.14_UTP18	1172.28	0.0798286	0.100731	0.792492	0.428074	0.691654	UTP18
ENSG00000011275.19_RNF216	2291.96	-0.126237	0.0780352	-1.6177	0.105728	0.3126	RNF216
ENSG00000011295.16_TTC19	1431.22	-0.0127241	0.0844541	-0.150663	0.880242	0.956472	TTC19
ENSG00000011304.22_PTBP1	13431.6	-0.0907585	0.07546	-1.20274	0.229078	0.497653	PTBP1
ENSG00000011332.22_DPF1	595.582	0.289444	0.120738	2.39729	0.016517	0.0948991	DPF1
ENSG00000011347.10_SYT7	967.206	-0.184674	0.0927735	-1.9906	0.0465254	0.189956	SYT7
ENSG00000011376.12_LARS2	2107.81	0.0357015	0.0954465	0.374048	0.708369	0.875913	LARS2
ENSG00000011405.14_PIK3C2A	1911.76	0.043865	0.100901	0.434733	0.663756	0.851151	PIK3C2A
ENSG00000011422.12_PLAUR	150.123	0.0909527	0.203277	0.447432	0.654563	0.845513	PLAUR
ENSG00000011426.11_ANLN	2841.54	0.11465	0.0848656	1.35096	0.176709	0.425815	ANLN
ENSG00000011451.21_WIZ	3209.19	-0.217496	0.0882565	-2.46437	0.0137255	0.0837494	WIZ
ENSG00000011454.18_RABGAP1	1184.04	0.100378	0.0935335	1.07318	0.28319	0.559292	RABGAP1
ENSG00000011465.18_DCN	3.05718	0.329176	1.29434	0.254319	0.799249	NA	DCN
ENSG00000011478.13_QPCTL	451.094	-0.184694	0.129965	-1.42111	0.155286	0.395458	QPCTL
ENSG00000011485.15_PPP5C	3027.75	0.0319446	0.076329	0.418512	0.675572	0.857559	PPP5C
ENSG00000011523.15_CEP68	784.485	-0.161434	0.107161	-1.50646	0.13195	0.358451	CEP68
ENSG00000011566.15_MAP4K3	636.35	0.182628	0.111765	1.63403	0.102252	0.307065	MAP4K3
ENSG00000011590.14_ZBTB32	0.183751	-1.07794	4.08047	-0.26417	0.791649	NA	ZBTB32
ENSG00000011600.12_TYROBP	0.985396	2.16363	2.3209	0.932239	0.351213	NA	TYROBP
ENSG00000011638.11_LDAF1	216.626	-0.258966	0.195796	-1.32264	0.185957	0.439662	LDAF1
ENSG00000011677.13_GABRA3	120.096	0.018065	0.215763	0.083726	0.933274	0.97733	GABRA3
ENSG00000012048.26_BRCA1	2706.76	0.0317681	0.0793587	0.40031	0.688928	0.864838	BRCA1
ENSG00000012061.17_ERCC1	1206.73	-0.223162	0.105697	-2.11134	0.0347432	0.157255	ERCC1
ENSG00000012124.17_CD22	22.4842	0.0933825	0.49884	0.187199	0.851504	0.944984	CD22
ENSG00000012171.20_SEMA3B	189.728	0.445946	0.177562	2.5115	0.0120219	0.0764074	SEMA3B
ENSG00000012174.12_MBTPS2	996.717	0.00823386	0.110934	0.0742231	0.940833	0.979062	MBTPS2
ENSG00000012211.13_PRICKLE3	601.857	0.00530306	0.113009	0.0469259	0.962572	0.987098	PRICKLE3
ENSG00000012223.13_LTF	0.481253	2.33141	3.12679	0.745625	0.455894	NA	LTF
ENSG00000012232.10_EXTL3	1303.62	-0.108194	0.110019	-0.983411	0.325405	0.601985	EXTL3
ENSG00000012504.15_NR1H4	0	NA	NA	NA	NA	NA	NR1H4
ENSG00000012660.14_ELOVL5	2294.86	-0.0934576	0.0767067	-1.21838	0.223081	0.489396	ELOVL5
ENSG00000012779.12_ALOX5	42.4321	-0.172123	0.384283	-0.447906	0.654221	0.845363	ALOX5
ENSG00000012817.16_KDM5D	0	NA	NA	NA	NA	NA	KDM5D
ENSG00000012822.16_CALCOCO1	1005.5	-0.441924	0.091429	-4.83352	1.34142e-06	7.12767e-05	CALCOCO1
ENSG00000012963.15_UBR7	1470.41	0.0199733	0.0874158	0.228486	0.819269	0.931103	UBR7
ENSG00000012983.12_MAP4K5	1488.35	0.0228218	0.0951284	0.239905	0.810404	0.926646	MAP4K5
ENSG00000013016.16_EHD3	440.852	-0.0628895	0.121799	-0.516337	0.605619	0.816892	EHD3
ENSG00000013275.8_PSMC4	2095.73	0.014269	0.0766029	0.186272	0.852231	0.945228	PSMC4
ENSG00000013288.9_MAN2B2	689.835	0.0707107	0.103498	0.683207	0.494476	0.745911	MAN2B2
ENSG00000013293.6_SLC7A14	0.159144	0.845613	4.08047	0.207234	0.835827	NA	SLC7A14
ENSG00000013297.12_CLDN11	0.552788	-1.1646	3.30962	-0.351882	0.724927	NA	CLDN11
ENSG00000013306.16_SLC25A39	3871.87	-0.257386	0.0785299	-3.27755	0.00104713	0.0134782	SLC25A39
ENSG00000013364.19_MVP	207.397	0.149264	0.228338	0.653697	0.513307	0.759264	MVP
ENSG00000013374.17_NUB1	2830.51	-0.0803285	0.0731865	-1.09759	0.272385	0.547794	NUB1
ENSG00000013375.17_PGM3	1243.69	-0.380814	0.0997769	-3.81665	0.000135274	0.00292297	PGM3
ENSG00000013392.8_RWDD2A	170.069	-0.000560365	0.181394	-0.00308922	0.997535	0.999705	RWDD2A
ENSG00000013441.17_CLK1	1038.92	0.294131	0.103334	2.84641	0.00442145	0.0384211	CLK1
ENSG00000013503.10_POLR3B	1071.04	-0.0851722	0.0971754	-0.876479	0.38077	0.650593	POLR3B
ENSG00000013523.12_ANGEL1	1371.65	-0.145207	0.101279	-1.43373	0.151649	0.389582	ANGEL1
ENSG00000013561.18_RNF14	702.108	0.128788	0.107271	1.20059	0.22991	0.498523	RNF14
ENSG00000013563.14_DNASE1L1	549.959	-0.597193	0.123447	-4.83765	1.31381e-06	7.031e-05	DNASE1L1
ENSG00000013573.17_DDX11	3426.35	0.089572	0.0746977	1.19913	0.230479	0.499438	DDX11
ENSG00000013583.10_HEBP1	744.789	-0.243877	0.136076	-1.79221	0.0731	0.250695	HEBP1
ENSG00000013588.10_GPRC5A	95.326	0.064853	0.247188	0.262363	0.793041	0.919967	GPRC5A
ENSG00000013619.15_MAMLD1	534.312	-0.177935	0.11692	-1.52185	0.128047	0.351965	MAMLD1
ENSG00000013725.14_CD6	0.380573	-2.09225	3.7626	-0.556066	0.578166	NA	CD6
ENSG00000013810.21_TACC3	4183.14	0.314659	0.0697388	4.51196	6.423e-06	0.000257109	TACC3
ENSG00000014123.10_UFL1	817.463	-0.246461	0.122553	-2.01105	0.0443201	0.183766	UFL1
ENSG00000014138.10_POLA2	1940.3	0.212751	0.0899344	2.36563	0.0179995	0.10031	POLA2
ENSG00000014164.7_ZC3H3	945.635	0.103413	0.0997925	1.03628	0.300071	0.577142	ZC3H3
ENSG00000014216.16_CAPN1	1548.05	-0.198005	0.0863945	-2.29187	0.0219134	0.114562	CAPN1
ENSG00000014257.17_ACP3	35.9874	-0.152144	0.372308	-0.40865	0.682797	0.861606	ACP3
ENSG00000014641.21_MDH1	1950.19	-0.2168	0.082219	-2.63686	0.00836764	0.0595506	MDH1
ENSG00000014824.14_SLC30A9	2088.26	-0.100577	0.0822451	-1.22289	0.221371	0.487605	SLC30A9
ENSG00000014914.21_MTMR11	39.099	-0.213126	0.351972	-0.60552	0.544833	0.780028	MTMR11
ENSG00000014919.13_COX15	1578.95	-0.0717901	0.121592	-0.590417	0.554911	0.785414	COX15
ENSG00000015133.20_CCDC88C	1291.16	-0.0466714	0.099355	-0.469744	0.638538	0.836243	CCDC88C
ENSG00000015153.15_YAF2	289.741	0.437074	0.156464	2.79345	0.00521493	0.0433783	YAF2
ENSG00000015171.21_ZMYND11	805.76	0.242053	0.108591	2.22904	0.0258111	0.128719	ZMYND11
ENSG00000015285.12_WAS	56.8894	-0.298115	0.310275	-0.960809	0.336648	0.610085	WAS
ENSG00000015413.10_DPEP1	8.26018	-0.909456	0.763979	-1.19042	0.233881	NA	DPEP1
ENSG00000015475.19_BID	506.342	-0.0471434	0.127202	-0.370619	0.710921	0.877036	BID
ENSG00000015479.20_MATR3	11110	-0.0984384	0.0797979	-1.2336	0.217353	0.481999	MATR3
ENSG00000015520.15_NPC1L1	28.9753	-0.0491329	0.41599	-0.118111	0.90598	0.966818	NPC1L1
ENSG00000015532.10_XYLT2	743.983	-0.0354026	0.112607	-0.31439	0.753225	0.897916	XYLT2
ENSG00000015568.13_RGPD5	529.422	0.286259	1.65715	0.172741	0.862855	0.949295	RGPD5
ENSG00000015592.17_STMN4	3.75403	1.53034	1.2161	1.2584	0.208248	NA	STMN4
ENSG00000015676.18_NUDCD3	1743.82	-0.296206	0.0941276	-3.14686	0.00165034	0.0190427	NUDCD3
ENSG00000016082.15_ISL1	358.924	0.238401	0.133582	1.78468	0.0743137	0.252982	ISL1
ENSG00000016391.11_CHDH	699.486	-0.258536	0.101983	-2.53509	0.0112419	0.0726952	CHDH
ENSG00000016402.14_IL20RA	0	NA	NA	NA	NA	NA	IL20RA
ENSG00000016490.16_CLCA1	0.159144	0.845613	4.08047	0.207234	0.835827	NA	CLCA1
ENSG00000016602.9_CLCA4	0	NA	NA	NA	NA	NA	CLCA4
ENSG00000016864.19_GLT8D1	654.507	-0.262378	0.108067	-2.42792	0.0151857	0.0895488	GLT8D1
ENSG00000017260.20_ATP2C1	1791.01	-0.165046	0.0832285	-1.98304	0.0473625	0.192166	ATP2C1
ENSG00000017427.17_IGF1	0.159144	0.845613	4.08047	0.207234	0.835827	NA	IGF1
ENSG00000017483.16_SLC38A5	16.2739	1.01296	0.584037	1.73442	0.0828437	NA	SLC38A5
ENSG00000017797.13_RALBP1	1975.16	-0.102178	0.0881016	-1.15977	0.246142	0.517919	RALBP1
ENSG00000018189.13_RUFY3	834.403	0.139353	0.0979044	1.42336	0.154631	0.394431	RUFY3
ENSG00000018236.15_CNTN1	230.673	-0.329234	0.177418	-1.85569	0.0634972	0.229223	CNTN1
ENSG00000018280.18_SLC11A1	6.67651	-0.458534	1.03966	-0.441042	0.659182	NA	SLC11A1
ENSG00000018408.15_WWTR1	1056.63	-0.0775698	0.0935314	-0.829346	0.406909	0.673266	WWTR1
ENSG00000018510.18_AGPS	2141.44	0.030375	0.086314	0.351913	0.724904	0.88377	AGPS
ENSG00000018607.9_ZNF285CP	0	NA	NA	NA	NA	NA	ZNF285CP
ENSG00000018610.15_STEEP1	1712.79	-0.0721612	0.0870507	-0.828956	0.40713	0.673269	STEEP1
ENSG00000018625.15_ATP1A2	3.99951	-1.36756	1.11153	-1.23035	0.218568	NA	ATP1A2
ENSG00000018699.13_TTC27	747.146	0.243179	0.111928	2.17264	0.0298076	0.141558	TTC27
ENSG00000018869.18_ZNF582	67.0783	0.882832	0.293976	3.00308	0.00267265	0.0269995	ZNF582
ENSG00000019102.12_VSIG2	1.20056	-2.5725	2.30579	-1.11567	0.264565	NA	VSIG2
ENSG00000019144.20_PHLDB1	1146.48	0.0623317	0.0926808	0.672542	0.501239	0.751179	PHLDB1
ENSG00000019169.11_MARCO	0.523362	0.84922	3.10919	0.273132	0.784752	NA	MARCO
ENSG00000019186.10_CYP24A1	1.92532	0.319559	1.60922	0.19858	0.842591	NA	CYP24A1
ENSG00000019485.14_PRDM11	219.207	-0.00056172	0.183872	-0.00305495	0.997563	0.999705	PRDM11
ENSG00000019505.8_SYT13	50.7778	-0.023289	0.330795	-0.070403	0.943873	0.980036	SYT13
ENSG00000019549.13_SNAI2	976.704	-0.328337	0.0943602	-3.47961	0.000502136	0.00795902	SNAI2
ENSG00000019582.17_CD74	7.63995	-1.35945	0.865696	-1.57035	0.116333	NA	CD74
ENSG00000019991.18_HGF	3.05603	-0.0341197	1.27268	-0.0268093	0.978612	NA	HGF
ENSG00000019995.6_ZRANB1	1417.08	0.0446076	0.0836363	0.533352	0.59379	0.809891	ZRANB1
ENSG00000020129.16_NCDN	1204.74	0.0232162	0.100208	0.231682	0.816785	0.929742	NCDN
ENSG00000020181.18_ADGRA2	2048.44	-0.376668	0.110573	-3.4065	0.000658008	0.00964153	ADGRA2
ENSG00000020219.9_CCT8L1P	1.18011	1.12782	2.0432	0.551988	0.580957	NA	CCT8L1P
ENSG00000020256.20_ZFP64	1398.32	-0.00739232	0.0862311	-0.0857269	0.931684	0.977053	ZFP64
ENSG00000020426.11_MNAT1	944.286	0.285614	0.118423	2.4118	0.0158738	0.0923304	MNAT1
ENSG00000020577.14_SAMD4A	388.98	0.112433	0.135377	0.830518	0.406246	0.672467	SAMD4A
ENSG00000020633.19_RUNX3	175.473	-0.180706	0.186832	-0.967211	0.333439	0.608033	RUNX3
ENSG00000020922.13_MRE11	994.402	-0.132355	0.0968394	-1.36675	0.171704	0.41877	MRE11
ENSG00000021300.14_PLEKHB1	238.929	-0.353977	0.172821	-2.04823	0.0405373	0.173876	PLEKHB1
ENSG00000021355.13_SERPINB1	400.284	-0.124189	0.132078	-0.940273	0.347078	0.619262	SERPINB1
ENSG00000021461.18_CYP3A43	0	NA	NA	NA	NA	NA	CYP3A43
ENSG00000021488.13_SLC7A9	8.27353	0.347767	0.800481	0.434448	0.663963	NA	SLC7A9
ENSG00000021574.15_SPAST	532.418	0.0116622	0.114147	0.102169	0.918623	0.971316	SPAST
ENSG00000021645.20_NRXN3	175.54	0.0241024	0.176843	0.136293	0.89159	0.960773	NRXN3
ENSG00000021762.20_OSBPL5	611.473	-0.08073	0.110669	-0.72947	0.465714	0.722906	OSBPL5
ENSG00000021776.11_AQR	1197.71	0.157283	0.100681	1.5622	0.118242	0.335067	AQR
ENSG00000021826.18_CPS1	380.336	-0.279402	0.137059	-2.03855	0.0414946	0.176065	CPS1
ENSG00000021852.14_C8B	0.302354	-0.11616	4.08047	-0.0284672	0.97729	NA	C8B
ENSG00000022267.19_FHL1	3882.69	-0.184245	0.086486	-2.13035	0.033143	0.152217	FHL1
ENSG00000022277.13_RTF2	1728.18	0.00886428	0.097346	0.0910595	0.927445	0.974983	RTF2
ENSG00000022355.18_GABRA1	0	NA	NA	NA	NA	NA	GABRA1
ENSG00000022556.16_NLRP2	1.48387	-0.629742	1.94182	-0.324305	0.745707	NA	NLRP2
ENSG00000022567.10_SLC45A4	352.982	0.255452	0.138766	1.84088	0.0656385	0.234574	SLC45A4
ENSG00000022840.17_RNF10	3415.46	0.155843	0.08616	1.80876	0.0704885	0.245215	RNF10
ENSG00000022976.16_ZNF839	552.056	0.0110052	0.112135	0.098142	0.92182	0.973022	ZNF839
ENSG00000023041.12_ZDHHC6	739.397	0.196132	0.149125	1.31522	0.188437	0.443552	ZDHHC6
ENSG00000023171.20_GRAMD1B	378.087	0.0987919	0.132629	0.744877	0.456346	0.715279	GRAMD1B
ENSG00000023191.17_RNH1	1841.32	-0.130295	0.0901587	-1.44518	0.148408	0.385436	RNH1
ENSG00000023228.15_NDUFS1	3018.69	-0.0316899	0.0903031	-0.350928	0.725642	0.884166	NDUFS1
ENSG00000023287.13_RB1CC1	2833.5	-0.224266	0.0845713	-2.6518	0.00800645	0.0577788	RB1CC1
ENSG00000023318.9_ERP44	1320.66	0.0349599	0.0879319	0.39758	0.69094	0.866408	ERP44
ENSG00000023330.15_ALAS1	1651.02	0.412858	0.0916804	4.50323	6.69295e-06	0.000265778	ALAS1
ENSG00000023445.17_BIRC3	11.246	0.705857	0.700508	1.00764	0.313629	NA	BIRC3
ENSG00000023516.9_AKAP11	1131.13	0.031419	0.117015	0.268504	0.788311	0.917903	AKAP11
ENSG00000023572.10_GLRX2	273.823	-0.14359	0.155588	-0.922885	0.356067	0.627767	GLRX2
ENSG00000023608.5_SNAPC1	514.143	0.242007	0.117597	2.05794	0.0395959	0.172063	SNAPC1
ENSG00000023697.13_DERA	481.92	-0.0775102	0.135187	-0.573358	0.566403	0.793367	DERA
ENSG00000023734.11_STRAP	5849.72	0.0391605	0.0805543	0.486138	0.626869	0.829106	STRAP
ENSG00000023839.12_ABCC2	49.0646	0.369919	0.325504	1.13645	0.255768	0.530205	ABCC2
ENSG00000023892.12_DEF6	314.899	-0.451791	0.142873	-3.16219	0.00156586	0.0182644	DEF6
ENSG00000023902.14_PLEKHO1	685.217	0.105201	0.116903	0.899903	0.368172	0.639716	PLEKHO1
ENSG00000023909.10_GCLM	488.005	-0.0681645	0.131324	-0.519057	0.603721	0.815687	GCLM
ENSG00000024048.11_UBR2	1400.3	0.302139	0.089252	3.38524	0.000711163	0.0101709	UBR2
ENSG00000024422.12_EHD2	417.12	-0.14469	0.127347	-1.13618	0.255879	0.530305	EHD2
ENSG00000024526.17_DEPDC1	2483.48	0.258772	0.077891	3.32224	0.000892993	0.0119904	DEPDC1
ENSG00000024862.18_CCDC28A	341.692	-0.106731	0.141931	-0.751989	0.452058	0.711541	CCDC28A
ENSG00000025039.15_RRAGD	613.154	-0.243821	0.119614	-2.0384	0.0415097	0.176065	RRAGD
ENSG00000025156.13_HSF2	1098.69	0.330425	0.0935091	3.53361	0.000409922	0.0068183	HSF2
ENSG00000025293.17_PHF20	1729.49	-0.145635	0.0997585	-1.45987	0.144325	0.379654	PHF20
ENSG00000025423.11_HSD17B6	174.474	-0.31903	0.189663	-1.68209	0.0925513	0.289703	HSD17B6
ENSG00000025434.19_NR1H3	286.344	0.443623	0.154927	2.86343	0.00419085	0.0372427	NR1H3
ENSG00000025708.14_TYMP	53.7057	-0.536007	0.314603	-1.70376	0.0884268	0.282055	TYMP
ENSG00000025770.19_NCAPH2	2107.1	-0.0214031	0.101023	-0.211865	0.832212	0.935534	NCAPH2
ENSG00000025772.8_TOMM34	1292.24	0.0153989	0.0930302	0.165526	0.86853	0.95203	TOMM34
ENSG00000025796.14_SEC63	3823.33	-0.251014	0.098217	-2.55571	0.0105971	0.0697031	SEC63
ENSG00000025800.14_KPNA6	2955.73	-0.0553138	0.0794645	-0.696082	0.486377	0.739597	KPNA6
ENSG00000026025.16_VIM	8274.13	-0.187797	0.0715968	-2.62298	0.00871647	0.0611874	VIM
ENSG00000026036.23_RTEL1-TNFRSF6B	260.623	-0.184039	0.178866	-1.02892	0.303516	0.580107	RTEL1-TNFRSF6B
ENSG00000026103.25_FAS	85.39	0.282628	0.256506	1.10184	0.270531	0.545483	FAS
ENSG00000026297.17_RNASET2	661.918	-0.304654	0.109109	-2.7922	0.00523505	0.0434731	RNASET2
ENSG00000026508.21_CD44	38.4948	0.0774145	0.356136	0.217373	0.827918	0.934788	CD44
ENSG00000026559.14_KCNG1	993.957	-0.358639	0.115128	-3.11514	0.00183856	0.020563	KCNG1
ENSG00000026652.15_AGPAT4	721.256	-0.00103421	0.104189	-0.00992623	0.99208	0.997827	AGPAT4
ENSG00000026751.17_SLAMF7	0.502575	2.38581	3.35713	0.710668	0.47729	NA	SLAMF7
ENSG00000026950.17_BTN3A1	283.967	0.068613	0.168105	0.408155	0.68316	0.861727	BTN3A1
ENSG00000027001.10_MIPEP	450.755	0.0140755	0.125656	0.112016	0.910811	0.968134	MIPEP
ENSG00000027075.17_PRKCH	494.991	-0.191914	0.13063	-1.46914	0.141796	0.376094	PRKCH
ENSG00000027644.5_INSRR	3.52852	-0.648788	1.21815	-0.532602	0.594309	NA	INSRR
ENSG00000027697.16_IFNGR1	770.038	0.168046	0.0996649	1.68611	0.0917752	0.288225	IFNGR1
ENSG00000027847.14_B4GALT7	511.714	0.0310729	0.114847	0.270559	0.786731	0.917005	B4GALT7
ENSG00000027869.12_SH2D2A	118.796	-0.496391	0.224757	-2.20857	0.0272049	0.133267	SH2D2A
ENSG00000028116.18_VRK2	433.414	-0.0203234	0.132695	-0.153159	0.878273	0.956093	VRK2
ENSG00000028137.19_TNFRSF1B	19.0348	0.366105	0.497325	0.736149	0.46164	NA	TNFRSF1B
ENSG00000028203.19_VEZT	1088.35	0.0773648	0.0962712	0.803613	0.421621	0.685691	VEZT
ENSG00000028277.22_POU2F2	54.5813	-0.115881	0.320873	-0.361142	0.717993	0.880884	POU2F2
ENSG00000028310.18_BRD9	940.582	0.103625	0.104002	0.996377	0.319067	0.595223	BRD9
ENSG00000028528.15_SNX1	1261.5	-0.166991	0.0848115	-1.96897	0.0489571	0.195582	SNX1
ENSG00000028839.10_TBPL1	411.981	0.0119786	0.142535	0.08404	0.933025	0.97733	TBPL1
ENSG00000029153.15_BMAL2	280.373	0.167827	0.142922	1.17426	0.240292	0.511302	BMAL2
ENSG00000029363.17_BCLAF1	8814.29	0.203614	0.108206	1.88173	0.059873	0.221333	BCLAF1
ENSG00000029364.12_SLC39A9	1609.81	-0.100529	0.0970176	-1.0362	0.30011	0.577143	SLC39A9
ENSG00000029534.22_ANK1	412.12	-0.0117273	0.123579	-0.0948966	0.924397	0.974042	ANK1
ENSG00000029559.7_IBSP	0	NA	NA	NA	NA	NA	IBSP
ENSG00000029639.11_TFB1M	494.747	-0.0558333	0.117268	-0.476119	0.63399	0.83321	TFB1M
ENSG00000029725.17_RABEP1	3635.6	-0.0483149	0.0717929	-0.672975	0.500963	0.751077	RABEP1
ENSG00000029993.15_HMGB3	4593.26	-0.0185931	0.0997122	-0.186468	0.852078	0.945177	HMGB3
ENSG00000030066.14_NUP160	2670.59	0.151436	0.0858366	1.76423	0.0776933	0.260215	NUP160
ENSG00000030110.14_BAK1	790.519	0.196475	0.116434	1.68744	0.0915191	0.287873	BAK1
ENSG00000030304.15_MUSK	0.283285	1.59311	4.05218	0.393148	0.69421	NA	MUSK
ENSG00000030419.17_IKZF2	77.2383	-0.0137161	0.264176	-0.0519202	0.958592	0.985883	IKZF2
ENSG00000030582.19_GRN	2886.91	-0.418242	0.0993678	-4.20903	2.56466e-05	0.000802788	GRN
ENSG00000031003.11_FAM13B	677.623	0.898893	0.131716	6.82449	8.82355e-12	2.68866e-09	FAM13B
ENSG00000031081.11_ARHGAP31	266.315	-0.0702481	0.150932	-0.465428	0.641625	0.838847	ARHGAP31
ENSG00000031691.7_CENPQ	260.821	-0.152127	0.146934	-1.03534	0.300509	0.577684	CENPQ
ENSG00000031698.13_SARS1	9553.2	-0.468291	0.115431	-4.0569	4.97278e-05	0.00132824	SARS1
ENSG00000031823.14_RANBP3	2377.95	-0.020341	0.0791634	-0.256949	0.797218	0.921733	RANBP3
ENSG00000032219.19_ARID4A	789.555	0.434757	0.104612	4.1559	3.24013e-05	0.000952038	ARID4A
ENSG00000032389.13_EIPR1	597.021	0.00275133	0.120796	0.0227767	0.981828	0.993809	EIPR1
ENSG00000032444.17_PNPLA6	1146.53	-0.276265	0.0936406	-2.95027	0.00317492	0.0305044	PNPLA6
ENSG00000032742.18_IFT88	209.403	0.199612	0.177276	1.126	0.260166	0.534471	IFT88
ENSG00000033011.14_ALG1	485.291	0.169602	0.117788	1.4399	0.149895	0.387548	ALG1
ENSG00000033030.16_ZCCHC8	1077.42	0.0744802	0.0912862	0.815898	0.414559	0.679896	ZCCHC8
ENSG00000033050.9_ABCF2	3249.16	0.00329055	0.0822324	0.0400153	0.968081	0.989412	ABCF2
ENSG00000033100.17_CHPF2	801.126	0.14441	0.112429	1.28446	0.198981	0.458178	CHPF2
ENSG00000033122.21_LRRC7	1.97767	-1.70188	1.62295	-1.04863	0.294348	NA	LRRC7
ENSG00000033170.17_FUT8	557.121	-0.183771	0.112301	-1.63641	0.101753	0.30612	FUT8
ENSG00000033178.13_UBA6	1357.25	0.024362	0.100853	0.241559	0.809122	0.926244	UBA6
ENSG00000033327.13_GAB2	288.839	-0.078668	0.202991	-0.387544	0.698353	0.869941	GAB2
ENSG00000033627.18_ATP6V0A1	1661	0.0682934	0.0812405	0.840632	0.400554	0.668278	ATP6V0A1
ENSG00000033800.14_PIAS1	1118.63	0.125689	0.0911498	1.37893	0.167916	0.413859	PIAS1
ENSG00000033867.18_SLC4A7	622.812	-0.0717513	0.126129	-0.568871	0.569444	0.794985	SLC4A7
ENSG00000034053.15_APBA2	876.796	-0.115279	0.0981662	-1.17433	0.240263	0.511302	APBA2
ENSG00000034152.20_MAP2K3	694.952	0.110485	0.118881	0.92937	0.352698	0.624634	MAP2K3
ENSG00000034239.11_CLXN	0	NA	NA	NA	NA	NA	CLXN
ENSG00000034510.6_TMSB10	4528.85	-0.148175	0.099629	-1.48727	0.136944	0.36749	TMSB10
ENSG00000034533.12_ASTE1	265.063	0.366757	0.150928	2.43	0.0150987	0.0891765	ASTE1
ENSG00000034677.13_RNF19A	610.259	0.402545	0.11164	3.60574	0.000311267	0.00549354	RNF19A
ENSG00000034693.15_PEX3	585.652	0.168214	0.111588	1.50745	0.131695	0.358037	PEX3
ENSG00000034713.8_GABARAPL2	827.326	0.0241582	0.0955136	0.252929	0.800323	0.922323	GABARAPL2
ENSG00000034971.17_MYOC	0	NA	NA	NA	NA	NA	MYOC
ENSG00000035115.22_SH3YL1	80.2708	-0.138328	0.254017	-0.544561	0.586055	0.805819	SH3YL1
ENSG00000035141.10_FAM136A	2308.64	-0.0311563	0.0899735	-0.346283	0.72913	0.886314	FAM136A
ENSG00000035403.18_VCL	4315.27	-0.105029	0.0701797	-1.49657	0.134505	0.363155	VCL
ENSG00000035499.13_DEPDC1B	501.849	-0.0226899	0.114168	-0.198741	0.842466	0.940981	DEPDC1B
ENSG00000035664.11_DAPK2	74.112	-0.167938	0.26522	-0.633201	0.526602	0.769325	DAPK2
ENSG00000035681.9_NSMAF	577.658	-0.131843	0.116283	-1.13381	0.256874	0.53107	NSMAF
ENSG00000035687.10_ADSS2	1041.35	-0.160548	0.0952068	-1.6863	0.0917375	0.288225	ADSS2
ENSG00000035720.8_STAP1	2.36447	0.23212	1.38573	0.167507	0.866971	NA	STAP1
ENSG00000035862.13_TIMP2	1270.61	-0.0463827	0.0944446	-0.49111	0.623348	0.826513	TIMP2
ENSG00000035928.17_RFC1	3574.84	-0.0161588	0.0782206	-0.20658	0.836338	0.937989	RFC1
ENSG00000036054.13_TBC1D23	1197.62	0.0361895	0.0874673	0.413748	0.679058	0.859093	TBC1D23
ENSG00000036257.14_CUL3	2465.5	-0.108522	0.0780301	-1.39077	0.164296	0.408305	CUL3
ENSG00000036448.10_MYOM2	549.604	-0.317446	0.111562	-2.84546	0.00443473	0.0384656	MYOM2
ENSG00000036473.9_OTC	1.20526	1.15654	2.14211	0.539905	0.589262	NA	OTC
ENSG00000036530.9_CYP46A1	32.7973	0.86132	0.423931	2.03174	0.0421795	0.177854	CYP46A1
ENSG00000036549.13_ZZZ3	2785.57	0.0879203	0.0781876	1.12448	0.26081	0.535261	ZZZ3
ENSG00000036565.15_SLC18A1	0.461498	0.776887	3.53135	0.219997	0.825874	NA	SLC18A1
ENSG00000036672.16_USP2	1226.03	0.420332	0.0909898	4.61955	3.84568e-06	0.00016938	USP2
ENSG00000036828.17_CASR	0	NA	NA	NA	NA	NA	CASR
ENSG00000037042.9_TUBG2	477.901	0.312645	0.121631	2.57043	0.0101571	0.0678685	TUBG2
ENSG00000037241.7_RPL26L1	1051.92	0.119134	0.102033	1.16761	0.242966	0.514279	RPL26L1
ENSG00000037280.16_FLT4	1969.54	-0.0161701	0.0773447	-0.209065	0.834397	0.936897	FLT4
ENSG00000037474.15_NSUN2	3000.67	0.129021	0.0935341	1.3794	0.16777	0.413616	NSUN2
ENSG00000037637.11_FBXO42	836.236	0.198835	0.108822	1.82715	0.0676767	0.239224	FBXO42
ENSG00000037749.13_MFAP3	834.36	0.117522	0.103395	1.13663	0.255692	0.530167	MFAP3
ENSG00000037757.14_MRI1	2430.55	-0.181339	0.0747511	-2.4259	0.0152705	0.0898997	MRI1
ENSG00000037897.17_METTL1	415.576	0.175725	0.141851	1.2388	0.21542	0.479676	METTL1
ENSG00000037965.6_HOXC8	186.526	0.194134	0.179066	1.08415	0.278298	0.553593	HOXC8
ENSG00000038002.9_AGA	382.204	-0.299824	0.163534	-1.83341	0.066742	0.237494	AGA
ENSG00000038210.14_PI4K2B	532.196	-0.0165027	0.121061	-0.136317	0.89157	0.960773	PI4K2B
ENSG00000038219.13_BOD1L1	2411.28	-0.100066	0.102669	-0.974649	0.329734	0.605335	BOD1L1
ENSG00000038274.18_MAT2B	732.177	-0.158567	0.106649	-1.48681	0.137066	0.367618	MAT2B
ENSG00000038295.8_TLL1	22.2536	-0.0950987	0.472487	-0.201273	0.840485	0.94009	TLL1
ENSG00000038358.15_EDC4	3088.31	-0.039624	0.076612	-0.517204	0.605014	0.816695	EDC4
ENSG00000038382.23_TRIO	2524.78	0.0094502	0.0777769	0.121504	0.903292	0.965706	TRIO
ENSG00000038427.16_VCAN	1480.71	-0.357795	0.100019	-3.57726	0.000347217	0.00596339	VCAN
ENSG00000038532.17_CLEC16A	1206.13	0.00934697	0.0884208	0.10571	0.915812	0.970269	CLEC16A
ENSG00000038945.15_MSR1	0.426495	0.63714	3.63581	0.17524	0.860891	NA	MSR1
ENSG00000039068.20_CDH1	11.2003	0.0183724	0.698882	0.0262883	0.979027	NA	CDH1
ENSG00000039123.16_MTREX	2556.74	-0.0404899	0.0919015	-0.440579	0.659517	0.848486	MTREX
ENSG00000039139.11_DNAH5	7.94138	0.740563	0.8043	0.920755	0.357178	NA	DNAH5
ENSG00000039319.17_ZFYVE16	1075.77	0.174928	0.108365	1.61425	0.106473	0.31391	ZFYVE16
ENSG00000039523.20_RIPOR1	1627.07	0.112643	0.0881076	1.27847	0.201082	0.460571	RIPOR1
ENSG00000039537.16_C6	0	NA	NA	NA	NA	NA	C6
ENSG00000039560.14_RAI14	2057.85	-0.174616	0.0871682	-2.00321	0.0451546	0.186295	RAI14
ENSG00000039600.11_SOX30	27.2984	2.17317	0.463279	4.69085	2.72073e-06	0.000128962	SOX30
ENSG00000039650.12_PNKP	1163.93	-0.2607	0.0941128	-2.77008	0.00560432	0.0454525	PNKP
ENSG00000039987.7_BEST2	3.22702	2.38291	1.34912	1.76626	0.0773519	NA	BEST2
ENSG00000040199.18_PHLPP2	459.727	0.114728	0.143619	0.798831	0.424388	0.687932	PHLPP2
ENSG00000040275.17_SPDL1	2282.23	0.0848739	0.0825766	1.02782	0.304035	0.58043	SPDL1
ENSG00000040341.18_STAU2	828.118	-0.17243	0.0998487	-1.72692	0.0841823	0.274019	STAU2
ENSG00000040487.13_SLC66A1	330.542	0.0270891	0.150594	0.179881	0.857246	0.947062	SLC66A1
ENSG00000040531.16_CTNS	368.43	0.045825	0.142536	0.321497	0.747834	0.895797	CTNS
ENSG00000040608.14_RTN4R	283.727	-0.0648592	0.141674	-0.457804	0.647093	0.841836	RTN4R
ENSG00000040633.13_PHF23	1317.17	0.357657	0.0998749	3.58105	0.000342215	0.00590118	PHF23
ENSG00000040731.10_CDH10	16.0157	0.858569	0.589974	1.45526	0.145596	NA	CDH10
ENSG00000040933.16_INPP4A	1258.87	-0.157252	0.107159	-1.46747	0.142248	0.37678	INPP4A
ENSG00000041353.10_RAB27B	23.8865	-0.199114	0.454593	-0.438006	0.661382	0.849836	RAB27B
ENSG00000041357.16_PSMA4	4013.35	0.0499488	0.116541	0.428596	0.668218	0.85304	PSMA4
ENSG00000041515.16_MYO16	0.536432	0.848873	3.08381	0.275267	0.783111	NA	MYO16
ENSG00000041802.11_LSG1	1701.87	0.227381	0.105813	2.14889	0.0316433	0.147646	LSG1
ENSG00000041880.15_PARP3	251.319	0.0764768	0.162493	0.470646	0.637893	0.835831	PARP3
ENSG00000041982.17_TNC	90.5486	-0.343429	0.265149	-1.29523	0.19524	0.452587	TNC
ENSG00000041988.16_THAP3	428.427	0.203051	0.14567	1.39391	0.163345	0.406824	THAP3
ENSG00000042062.13_RIPOR3	1.78879	1.17846	1.70204	0.69238	0.488699	NA	RIPOR3
ENSG00000042088.14_TDP1	991.609	-0.032045	0.0969685	-0.330468	0.741046	0.893168	TDP1
ENSG00000042286.15_AIFM2	61.2936	0.408417	0.29593	1.38011	0.167552	0.41337	AIFM2
ENSG00000042304.14_C2orf83	0.141643	0.845613	4.08047	0.207234	0.835827	NA	C2orf83
ENSG00000042317.17_SPATA7	177.582	0.288672	0.176876	1.63206	0.102667	0.307569	SPATA7
ENSG00000042429.12_MED17	525.284	0.113626	0.148257	0.766414	0.44343	0.704482	MED17
ENSG00000042445.14_RETSAT	820.647	-0.105513	0.118444	-0.890829	0.373021	0.643956	RETSAT
ENSG00000042493.16_CAPG	220.129	-0.175727	0.20576	-0.854037	0.393084	0.660568	CAPG
ENSG00000042753.12_AP2S1	1575.14	0.0469904	0.0795059	0.591031	0.5545	0.785414	AP2S1
ENSG00000042781.14_USH2A	1.34678	-0.97189	1.88586	-0.515357	0.606304	NA	USH2A
ENSG00000042813.8_ZPBP	0	NA	NA	NA	NA	NA	ZPBP
ENSG00000042832.12_TG	14.5904	0.016768	0.614688	0.0272789	0.978237	NA	TG
ENSG00000042980.14_ADAM28	0	NA	NA	NA	NA	NA	ADAM28
ENSG00000043039.7_BARX2	282.151	-0.0744313	0.148046	-0.502757	0.615135	0.821666	BARX2
ENSG00000043093.15_DCUN1D1	793.355	0.150579	0.121717	1.23712	0.216041	0.48017	DCUN1D1
ENSG00000043143.22_JADE2	216.547	-0.0451907	0.171473	-0.263544	0.792131	0.919702	JADE2
ENSG00000043355.12_ZIC2	1708.21	-0.0500586	0.0906535	-0.552197	0.580814	0.80272	ZIC2
ENSG00000043462.13_LCP2	0.860529	-1.98764	2.57562	-0.771715	0.440283	NA	LCP2
ENSG00000043514.17_TRIT1	692.651	0.600777	0.104	5.77669	7.61837e-09	1.08333e-06	TRIT1
ENSG00000043591.6_ADRB1	15.7013	0.0205767	0.562084	0.0366079	0.970798	NA	ADRB1
ENSG00000044012.4_GUCA2B	0	NA	NA	NA	NA	NA	GUCA2B
ENSG00000044090.13_CUL7	779.058	-0.380972	0.13187	-2.88899	0.00386482	0.0351222	CUL7
ENSG00000044115.21_CTNNA1	4852.92	-0.207212	0.0798997	-2.5934	0.00950314	0.0649389	CTNNA1
ENSG00000044446.12_PHKA2	932.221	-0.0733703	0.101449	-0.723221	0.469544	0.726353	PHKA2
ENSG00000044459.15_CNTLN	596.59	0.118117	0.11021	1.07175	0.283834	0.559683	CNTLN
ENSG00000044524.11_EPHA3	182.237	-0.361795	0.199639	-1.81225	0.0699476	0.244033	EPHA3
ENSG00000044574.9_HSPA5	12813	-0.434804	0.102366	-4.24756	2.16112e-05	0.00069995	HSPA5
ENSG00000046604.15_DSG2	6042.32	-0.300414	0.100741	-2.98203	0.00286339	0.0283135	DSG2
ENSG00000046647.14_GEMIN8	238.085	0.163973	0.159153	1.03028	0.302878	0.579416	GEMIN8
ENSG00000046651.16_OFD1	787.102	0.133303	0.120663	1.10476	0.269265	0.543966	OFD1
ENSG00000046653.15_GPM6B	357.492	-0.169578	0.136046	-1.24648	0.212589	0.476459	GPM6B
ENSG00000046774.10_MAGEC2	3.09046	-0.796232	1.24208	-0.641046	0.521493	NA	MAGEC2
ENSG00000046889.19_PREX2	159.273	0.103594	0.190545	0.543673	0.586667	0.806026	PREX2
ENSG00000047056.18_WDR37	374.659	0.0544069	0.128387	0.423771	0.671733	0.855187	WDR37
ENSG00000047188.16_YTHDC2	1601.68	0.0448845	0.0878162	0.511119	0.609268	0.819326	YTHDC2
ENSG00000047230.15_CTPS2	749.87	-0.0739397	0.106491	-0.69433	0.487475	0.74029	CTPS2
ENSG00000047249.18_ATP6V1H	689.163	-0.127069	0.11016	-1.1535	0.248707	0.521039	ATP6V1H
ENSG00000047315.17_POLR2B	3877.13	-0.0717263	0.0938079	-0.764609	0.444505	0.705262	POLR2B
ENSG00000047346.13_ATOSA	268.64	0.496164	0.152933	3.24432	0.00117729	0.0146975	ATOSA
ENSG00000047365.13_ARAP2	142.359	0.0918369	0.210316	0.436661	0.662358	0.850478	ARAP2
ENSG00000047410.14_TPR	6958.9	-0.0367995	0.0743278	-0.495097	0.620532	0.824303	TPR
ENSG00000047457.14_CP	0.196822	-1.07794	4.08047	-0.26417	0.791649	NA	CP
ENSG00000047578.14_KATNIP	693.987	0.322194	0.11558	2.78764	0.00530939	0.0438708	KATNIP
ENSG00000047579.20_DTNBP1	860.174	-0.0775185	0.11376	-0.681421	0.495605	0.746662	DTNBP1
ENSG00000047597.7_XK	210.336	-0.130964	0.185154	-0.707322	0.479366	0.733868	XK
ENSG00000047617.18_ANO2	32.8387	0.65159	0.408466	1.59521	0.110665	0.321029	ANO2
ENSG00000047621.12_C12orf4	636.126	0.439355	0.107291	4.09499	4.22179e-05	0.0011707	C12orf4
ENSG00000047634.15_SCML1	2002.21	-0.0202566	0.0854792	-0.236976	0.812675	0.928105	SCML1
ENSG00000047644.20_WWC3	0.141643	0.845613	4.08047	0.207234	0.835827	NA	WWC3
ENSG00000047648.23_ARHGAP6	1.31182	-0.0210271	2.01443	-0.0104382	0.991672	NA	ARHGAP6
ENSG00000047662.5_FAM184B	23.2698	0.033345	0.454049	0.0734391	0.941457	0.979369	FAM184B
ENSG00000047849.22_MAP4	7808.04	-0.288113	0.0887581	-3.24605	0.0011702	0.0146431	MAP4
ENSG00000047932.14_GOPC	2071.39	-0.058568	0.0831622	-0.704262	0.481269	0.735349	GOPC
ENSG00000047936.11_ROS1	0.481674	-0.987845	3.19797	-0.308898	0.757399	NA	ROS1
ENSG00000048028.12_USP28	1399.91	-0.0599228	0.0862713	-0.694586	0.487315	0.74029	USP28
ENSG00000048052.25_HDAC9	40.5736	-0.199393	0.363459	-0.5486	0.58328	0.80415	HDAC9
ENSG00000048140.18_TSPAN17	822.356	-0.162788	0.0975409	-1.66892	0.095134	0.294473	TSPAN17
ENSG00000048162.22_NOP16	1042.79	0.0854583	0.100962	0.846443	0.397306	0.665415	NOP16
ENSG00000048342.18_CC2D2A	445.286	0.271026	0.12914	2.0987	0.0358433	0.160425	CC2D2A
ENSG00000048392.13_RRM2B	590.499	0.0447795	0.107973	0.414727	0.678342	0.858769	RRM2B
ENSG00000048405.11_ZNF800	355.609	0.0922805	0.129869	0.710567	0.477353	0.732284	ZNF800
ENSG00000048462.11_TNFRSF17	0	NA	NA	NA	NA	NA	TNFRSF17
ENSG00000048471.14_SNX29	633.238	0.174541	0.12098	1.44272	0.149098	0.386558	SNX29
ENSG00000048540.16_LMO3	0.426495	0.63714	3.63581	0.17524	0.860891	NA	LMO3
ENSG00000048544.6_MRPS10	1040.33	0.13141	0.0930311	1.41254	0.15779	0.399385	MRPS10
ENSG00000048545.18_GUCA1A	0.323676	-0.11616	4.04246	-0.0287348	0.977076	NA	GUCA1A
ENSG00000048649.14_RSF1	2967	0.071701	0.0783346	0.915317	0.360025	0.631455	RSF1
ENSG00000048707.15_VPS13D	1510.05	0.0135762	0.0963922	0.140843	0.887994	0.959311	VPS13D
ENSG00000048740.19_CELF2	411.357	-0.057627	0.128646	-0.447952	0.654188	0.845363	CELF2
ENSG00000048828.18_FAM120A	4187.62	-0.122884	0.0777637	-1.58022	0.114056	0.327824	FAM120A
ENSG00000048991.18_R3HDM1	2564.2	0.174281	0.0807536	2.15818	0.0309136	0.145285	R3HDM1
ENSG00000049089.15_COL9A2	85.7838	-0.0817588	0.246345	-0.331887	0.739975	0.892669	COL9A2
ENSG00000049130.16_KITLG	404.569	0.0860858	0.132098	0.651679	0.514608	0.760086	KITLG
ENSG00000049167.16_ERCC8	450.122	-0.109564	0.129848	-0.843792	0.398786	0.666853	ERCC8
ENSG00000049192.15_ADAMTS6	84.1154	0.486752	0.263404	1.84793	0.0646121	0.232194	ADAMTS6
ENSG00000049239.13_H6PD	835.561	-0.359617	0.131739	-2.72977	0.00633787	0.0497271	H6PD
ENSG00000049245.13_VAMP3	1499.52	-0.117594	0.082706	-1.42184	0.155074	0.39512	VAMP3
ENSG00000049246.15_PER3	381.224	-0.320237	0.143942	-2.22477	0.0260968	0.129719	PER3
ENSG00000049247.14_UTS2	0	NA	NA	NA	NA	NA	UTS2
ENSG00000049249.10_TNFRSF9	7.84042	0.333926	0.850853	0.392461	0.694718	NA	TNFRSF9
ENSG00000049283.19_EPN3	7.22495	0.187959	0.816237	0.230275	0.817878	NA	EPN3
ENSG00000049323.16_LTBP1	784.42	-0.395942	0.109944	-3.60132	0.000316609	0.00554845	LTBP1
ENSG00000049449.10_RCN1	6177.04	-0.301344	0.0720178	-4.1843	2.8605e-05	0.000868092	RCN1
ENSG00000049540.19_ELN	12.4251	-0.99416	0.649547	-1.53054	0.125883	NA	ELN
ENSG00000049541.11_RFC2	2558.88	0.146545	0.0786507	1.86324	0.0624279	0.227047	RFC2
ENSG00000049618.25_ARID1B	3029.54	-0.0391349	0.0752981	-0.519734	0.603249	0.815493	ARID1B
ENSG00000049656.14_CLPTM1L	1552.16	-0.0280384	0.0813027	-0.344864	0.730196	0.886964	CLPTM1L
ENSG00000049759.20_NEDD4L	783.586	-0.098899	0.103801	-0.952776	0.340704	0.613933	NEDD4L
ENSG00000049768.18_FOXP3	39.3374	-0.719951	0.377607	-1.90662	0.0565703	0.213541	FOXP3
ENSG00000049769.14_PPP1R3F	70.8915	-0.333008	0.294957	-1.129	0.258896	0.53289	PPP1R3F
ENSG00000049860.14_HEXB	1378.84	-0.093386	0.0877897	-1.06375	0.287443	0.56323	HEXB
ENSG00000049883.15_PTCD2	715.111	0.228235	0.105017	2.17331	0.0297568	0.141361	PTCD2
ENSG00000050030.16_NEXMIF	122.809	0.369084	0.214145	1.72352	0.0847941	0.275111	NEXMIF
ENSG00000050130.18_JKAMP	416.029	0.0111808	0.147648	0.075726	0.939637	0.978704	JKAMP
ENSG00000050165.19_DKK3	186.283	-0.0541756	0.18363	-0.295027	0.767974	0.906523	DKK3
ENSG00000050327.15_ARHGEF5	0	NA	NA	NA	NA	NA	ARHGEF5
ENSG00000050344.9_NFE2L3	703.317	0.0124955	0.105577	0.118355	0.905787	0.966781	NFE2L3
ENSG00000050393.12_MCUR1	1017.16	-0.250591	0.106185	-2.35995	0.0182772	0.10126	MCUR1
ENSG00000050405.14_LIMA1	1550.55	0.0270987	0.0822295	0.329549	0.741741	0.893639	LIMA1
ENSG00000050426.16_LETMD1	993.913	-0.132925	0.117311	-1.13311	0.25717	0.531299	LETMD1
ENSG00000050438.17_SLC4A8	78.7814	0.408351	0.261101	1.56396	0.117828	0.334027	SLC4A8
ENSG00000050555.19_LAMC3	330.541	-0.35402	0.146246	-2.42073	0.0154895	0.0906124	LAMC3
ENSG00000050628.21_PTGER3	4.44958	-1.36579	1.13061	-1.20801	0.227045	NA	PTGER3
ENSG00000050730.16_TNIP3	3.59963	0.883623	1.22325	0.722357	0.470075	NA	TNIP3
ENSG00000050748.18_MAPK9	1352.34	-0.169374	0.0862338	-1.96413	0.0495153	0.196783	MAPK9
ENSG00000050767.18_COL23A1	79.2676	-0.809921	0.276919	-2.92476	0.00344725	0.0322297	COL23A1
ENSG00000050820.17_BCAR1	1292.66	0.225532	0.0872959	2.58353	0.00977955	0.0663131	BCAR1
ENSG00000051009.11_FHIP1B	466.289	0.163652	0.121125	1.3511	0.176664	0.42579	FHIP1B
ENSG00000051108.15_HERPUD1	1563.93	-0.629595	0.112194	-5.61166	2.00399e-08	2.37473e-06	HERPUD1
ENSG00000051128.19_HOMER3	357.584	0.381559	0.130326	2.92773	0.00341445	0.0320453	HOMER3
ENSG00000051180.17_RAD51	740.583	-0.0109682	0.122417	-0.0895971	0.928607	0.975655	RAD51
ENSG00000051341.15_POLQ	1300.6	0.276596	0.103465	2.67334	0.00750995	0.0554555	POLQ
ENSG00000051382.9_PIK3CB	565.425	0.0451907	0.1104	0.409337	0.682292	0.861197	PIK3CB
ENSG00000051523.12_CYBA	2278.51	-0.240065	0.0906758	-2.64751	0.00810858	0.0580967	CYBA
ENSG00000051596.10_THOC3	4235.67	-0.0299174	0.0681745	-0.438835	0.660781	0.849283	THOC3
ENSG00000051620.11_HEBP2	1330.44	0.115383	0.0941504	1.22551	0.220381	0.486549	HEBP2
ENSG00000051825.15_MPHOSPH9	1439.26	0.147534	0.0950848	1.5516	0.120757	0.33936	MPHOSPH9
ENSG00000052126.17_PLEKHA5	922.281	0.016198	0.102133	0.158598	0.873986	0.954282	PLEKHA5
ENSG00000052344.16_PRSS8	68.3264	-0.37035	0.302596	-1.22391	0.220986	0.487088	PRSS8
ENSG00000052723.12_SIKE1	1748.35	-0.30342	0.0969288	-3.13034	0.00174607	0.0197992	SIKE1
ENSG00000052749.14_RRP12	2005.86	0.384246	0.0874479	4.394	1.11286e-05	0.000392817	RRP12
ENSG00000052795.13_FNIP2	996.255	0.0242408	0.0968136	0.250386	0.802289	0.923322	FNIP2
ENSG00000052802.13_MSMO1	356.167	0.215287	0.148991	1.44496	0.148468	0.385526	MSMO1
ENSG00000052841.16_TTC17	1666.86	-0.0705164	0.0837694	-0.841792	0.399904	0.667679	TTC17
ENSG00000052850.8_ALX4	849.118	-0.138818	0.118744	-1.16905	0.242383	0.513633	ALX4
ENSG00000053108.18_FSTL4	48.4793	0.370187	0.346187	1.06932	0.284924	0.560722	FSTL4
ENSG00000053254.16_FOXN3	1647.22	-0.177671	0.090455	-1.96419	0.0495085	0.196783	FOXN3
ENSG00000053328.9_METTL24	18.1564	-0.221846	0.534669	-0.414922	0.678199	NA	METTL24
ENSG00000053371.13_AKR7A2	811.901	-0.518815	0.0957547	-5.41816	6.02145e-08	5.64323e-06	AKR7A2
ENSG00000053372.5_MRTO4	2049.68	0.209022	0.0883977	2.36457	0.018051	0.100492	MRTO4
ENSG00000053438.11_NNAT	0.486105	-0.945908	3.1884	-0.296672	0.766717	NA	NNAT
ENSG00000053501.14_USE1	363.4	0.0336852	0.137526	0.244937	0.806506	0.924738	USE1
ENSG00000053524.13_MCF2L2	40.2336	0.334589	0.354075	0.944965	0.344677	0.616996	MCF2L2
ENSG00000053702.15_NRIP2	1.55496	-1.14822	1.82655	-0.628625	0.529595	NA	NRIP2
ENSG00000053747.17_LAMA3	1217.48	0.241625	0.101392	2.38307	0.0171687	0.097285	LAMA3
ENSG00000053770.12_AP5M1	697.919	-0.00657761	0.117387	-0.0560335	0.955315	0.984525	AP5M1
ENSG00000053900.11_ANAPC4	360.179	0.0251795	0.14332	0.175688	0.860539	0.948314	ANAPC4
ENSG00000053918.20_KCNQ1	150.903	-0.386971	0.237394	-1.63008	0.103085	0.308325	KCNQ1
ENSG00000054116.12_TRAPPC3	1046.78	-0.125188	0.10105	-1.23887	0.215393	0.479676	TRAPPC3
ENSG00000054118.15_THRAP3	6904.88	-0.0454973	0.0710927	-0.639972	0.522191	0.765521	THRAP3
ENSG00000054148.18_PHPT1	1018	-0.132427	0.104161	-1.27137	0.203596	0.463843	PHPT1
ENSG00000054179.12_ENTPD2	48.9215	-0.124867	0.315353	-0.395961	0.692134	0.866707	ENTPD2
ENSG00000054219.11_LY75	1.3994	1.46032	2.04455	0.71425	0.475072	NA	LY75
ENSG00000054267.22_ARID4B	1873.82	0.530472	0.114731	4.62363	3.77077e-06	0.000167066	ARID4B
ENSG00000054277.14_OPN3	47.2587	-0.887974	0.353417	-2.51254	0.0119866	0.0762883	OPN3
ENSG00000054282.16_SDCCAG8	479.086	0.165354	0.115557	1.43092	0.152452	0.390759	SDCCAG8
ENSG00000054356.14_PTPRN	0.51511	0.776984	3.39273	0.229014	0.818858	NA	PTPRN
ENSG00000054392.13_HHAT	103.841	-0.203806	0.260151	-0.783415	0.433383	0.696075	HHAT
ENSG00000054523.20_KIF1B	2897.9	0.00452094	0.0774788	0.0583507	0.953469	0.984118	KIF1B
ENSG00000054598.9_FOXC1	2266.36	0.207029	0.0839357	2.46652	0.0136432	0.0834519	FOXC1
ENSG00000054611.14_TBC1D22A	676.286	-0.0847908	0.106656	-0.794992	0.426618	0.690135	TBC1D22A
ENSG00000054654.20_SYNE2	1671.04	-0.291229	0.145301	-2.00431	0.0450365	0.185911	SYNE2
ENSG00000054690.14_PLEKHH1	916.894	-0.0315056	0.104644	-0.301074	0.763358	0.904027	PLEKHH1
ENSG00000054793.14_ATP9A	1106.41	-0.138909	0.101181	-1.37287	0.169793	0.416149	ATP9A
ENSG00000054796.13_SPO11	0.141643	0.845613	4.08047	0.207234	0.835827	NA	SPO11
ENSG00000054803.4_CBLN4	0	NA	NA	NA	NA	NA	CBLN4
ENSG00000054938.17_CHRDL2	0.917426	-3.36616	2.48986	-1.35195	0.176392	NA	CHRDL2
ENSG00000054965.11_FAM168A	1814.84	0.0103164	0.0950248	0.108566	0.913547	0.96945	FAM168A
ENSG00000054967.13_RELT	488.078	0.176426	0.123764	1.4255	0.154012	0.393466	RELT
ENSG00000054983.17_GALC	142.884	-0.185259	0.197821	-0.936499	0.349016	0.621264	GALC
ENSG00000055044.11_NOP58	4208.16	0.462364	0.0968351	4.77475	1.79926e-06	9.13769e-05	NOP58
ENSG00000055070.17_SZRD1	4034.72	-0.0125413	0.0727182	-0.172465	0.863072	0.949313	SZRD1
ENSG00000055118.18_KCNH2	365.436	0.150262	0.162347	0.92556	0.354674	0.62648	KCNH2
ENSG00000055130.18_CUL1	4279.39	-0.0610554	0.0816844	-0.747455	0.454789	0.713948	CUL1
ENSG00000055147.19_FAM114A2	576.36	0.145727	0.11684	1.24723	0.212314	0.475913	FAM114A2
ENSG00000055163.21_CYFIP2	1385.4	-0.0110274	0.10648	-0.103563	0.917516	0.970781	CYFIP2
ENSG00000055208.20_TAB2	2795.14	0.266501	0.0779525	3.41876	0.000629083	0.00935541	TAB2
ENSG00000055211.14_GINM1	626.901	-0.175544	0.106739	-1.6446	0.100052	0.303325	GINM1
ENSG00000055332.19_EIF2AK2	1848.42	-0.0850659	0.0882958	-0.963419	0.335337	0.60961	EIF2AK2
ENSG00000055483.20_USP36	2612.66	0.309718	0.0817126	3.79034	0.000150442	0.00317716	USP36
ENSG00000055609.21_KMT2C	3696.85	0.223521	0.106251	2.10371	0.0354034	0.159005	KMT2C
ENSG00000055732.13_MCOLN3	324.933	0.0179021	0.173027	0.103464	0.917594	0.970781	MCOLN3
ENSG00000055813.6_CCDC85A	6.66863	-0.357753	0.86278	-0.414652	0.678397	NA	CCDC85A
ENSG00000055917.17_PUM2	2239.56	-0.096183	0.0767835	-1.25265	0.210332	0.473132	PUM2
ENSG00000055950.17_MRPL43	831.562	0.0827355	0.10688	0.774096	0.438874	0.700966	MRPL43
ENSG00000055955.17_ITIH4	35.6047	-0.538605	0.372657	-1.44531	0.148371	0.385408	ITIH4
ENSG00000055957.11_ITIH1	2.84982	-1.39901	1.41096	-0.991527	0.321428	NA	ITIH1
ENSG00000056050.7_HPF1	640.952	-0.0632465	0.105597	-0.598943	0.549211	0.782692	HPF1
ENSG00000056097.16_ZFR	4063.34	0.127793	0.0832026	1.53592	0.124557	0.346637	ZFR
ENSG00000056277.16_ZNF280C	914.256	0.164957	0.102729	1.60576	0.108327	0.317534	ZNF280C
ENSG00000056291.19_NPFFR2	3.40162	0.522792	1.28109	0.408083	0.683212	NA	NPFFR2
ENSG00000056487.17_PHF21B	406.707	0.722443	0.170918	4.22685	2.36988e-05	0.000760962	PHF21B
ENSG00000056558.11_TRAF1	65.8202	-0.309328	0.292183	-1.05868	0.289746	0.565812	TRAF1
ENSG00000056586.16_RC3H2	1819.98	0.18284	0.0917212	1.99343	0.0462144	0.189308	RC3H2
ENSG00000056736.10_IL17RB	255.917	-0.0652349	0.16718	-0.390208	0.696383	0.868791	IL17RB
ENSG00000056972.21_TRAF3IP2	399.723	0.0150483	0.132925	0.113209	0.909865	0.968054	TRAF3IP2
ENSG00000056998.21_GYG2	563.252	-0.148968	0.11978	-1.24368	0.213617	0.477604	GYG2
ENSG00000057019.16_DCBLD2	998.93	-0.0077842	0.108173	-0.0719604	0.942633	0.979666	DCBLD2
ENSG00000057149.16_SERPINB3	0	NA	NA	NA	NA	NA	SERPINB3
ENSG00000057252.13_SOAT1	742.54	-0.178233	0.100291	-1.77716	0.0755412	0.255993	SOAT1
ENSG00000057294.19_PKP2	638.321	0.0245348	0.109816	0.223418	0.823211	0.932848	PKP2
ENSG00000057468.7_MSH4	8.51416	0.11678	0.766673	0.152321	0.878934	NA	MSH4
ENSG00000057593.14_F7	1.41178	-0.424187	1.8244	-0.232508	0.816143	NA	F7
ENSG00000057608.17_GDI2	3440.59	-0.0836027	0.0747485	-1.11845	0.263373	0.537855	GDI2
ENSG00000057657.17_PRDM1	14.9314	0.998004	0.580738	1.71851	0.0857035	NA	PRDM1
ENSG00000057663.16_ATG5	616.644	0.0950204	0.111862	0.849441	0.395636	0.663511	ATG5
ENSG00000057704.13_TMCC3	348.625	0.0841703	0.132996	0.632877	0.526814	0.769346	TMCC3
ENSG00000057757.10_PITHD1	1269.33	0.0549984	0.0968976	0.567593	0.570311	0.795527	PITHD1
ENSG00000057935.14_MTA3	1164.19	0.0501822	0.0910209	0.551326	0.58141	0.803204	MTA3
ENSG00000058056.10_USP13	1194.57	-0.0890847	0.0926608	-0.961407	0.336348	0.60987	USP13
ENSG00000058063.16_ATP11B	1242.32	0.00627853	0.0941566	0.0666818	0.946835	0.981075	ATP11B
ENSG00000058085.15_LAMC2	33.4953	0.00781043	0.377095	0.0207121	0.983475	0.9946	LAMC2
ENSG00000058091.17_CDK14	437.681	-0.0991828	0.124647	-0.795707	0.426202	0.689963	CDK14
ENSG00000058262.11_SEC61A1	9409.62	-0.486711	0.205167	-2.37227	0.0176791	0.0991236	SEC61A1
ENSG00000058272.19_PPP1R12A	2101.5	0.191597	0.0903873	2.11973	0.0340288	0.155045	PPP1R12A
ENSG00000058335.16_RASGRF1	29.9484	-0.0245822	0.43065	-0.0570817	0.95448	0.98439	RASGRF1
ENSG00000058404.21_CAMK2B	190.121	0.0896954	0.172323	0.520508	0.60271	0.815434	CAMK2B
ENSG00000058453.17_CROCC	1018.87	-0.18792	0.0889738	-2.11209	0.0346791	0.15705	CROCC
ENSG00000058600.16_POLR3E	2206.02	-0.157775	0.0811885	-1.94332	0.0519774	0.203108	POLR3E
ENSG00000058668.16_ATP2B4	1589.7	-0.243744	0.105159	-2.31787	0.0204566	0.109397	ATP2B4
ENSG00000058673.17_ZC3H11A	3843.93	0.0173835	0.0811088	0.214323	0.830295	0.935038	ZC3H11A
ENSG00000058729.11_RIOK2	960.256	0.262533	0.102517	2.56087	0.0104411	0.0689806	RIOK2
ENSG00000058799.15_YIPF1	184.357	0.117423	0.173736	0.675869	0.499124	0.749763	YIPF1
ENSG00000058804.12_NDC1	2029.74	-0.166998	0.0868276	-1.92332	0.0544395	0.209019	NDC1
ENSG00000058866.15_DGKG	8.23493	1.20078	0.811174	1.48029	0.138795	NA	DGKG
ENSG00000059122.17_FLYWCH1	1933.88	-0.224394	0.118262	-1.89744	0.05777	0.216127	FLYWCH1
ENSG00000059145.19_UNKL	661.084	-0.011926	0.104189	-0.114465	0.90887	0.967755	UNKL
ENSG00000059377.19_TBXAS1	62.0367	-0.0197268	0.28467	-0.0692971	0.944753	0.980377	TBXAS1
ENSG00000059378.13_PARP12	23.5781	1.47672	0.498147	2.96443	0.00303247	0.0295161	PARP12
ENSG00000059573.9_ALDH18A1	3427.24	-0.0643709	0.0725838	-0.886849	0.37516	0.645585	ALDH18A1
ENSG00000059588.10_TARBP1	1109.97	-0.235479	0.11472	-2.05264	0.0401076	0.173127	TARBP1
ENSG00000059691.12_GATB	993.728	-0.134797	0.0910788	-1.48001	0.138872	0.371195	GATB
ENSG00000059728.11_MXD1	232.494	0.362079	0.171794	2.10763	0.0350629	0.157926	MXD1
ENSG00000059758.8_CDK17	560.823	0.0701135	0.121063	0.579147	0.56249	0.79045	CDK17
ENSG00000059769.20_DNAJC25	422.266	0.656011	0.127905	5.12891	2.91422e-07	2.0563e-05	DNAJC25
ENSG00000059804.17_SLC2A3	14.6879	-0.191155	0.566591	-0.337377	0.735833	NA	SLC2A3
ENSG00000059915.17_PSD	42.2443	0.60362	0.343305	1.75826	0.0787027	0.262712	PSD
ENSG00000060069.18_CTDP1	619.081	0.121177	0.115279	1.05116	0.293186	0.569176	CTDP1
ENSG00000060138.13_YBX3	9648.39	-0.1595	0.0692384	-2.30364	0.0212428	0.112165	YBX3
ENSG00000060140.9_STYK1	19.2014	0.496821	0.517122	0.960743	0.336682	NA	STYK1
ENSG00000060237.19_WNK1	6212.78	-0.0593959	0.0710884	-0.835521	0.403424	0.670249	WNK1
ENSG00000060303.5_RPS17P5	0	NA	NA	NA	NA	NA	RPS17P5
ENSG00000060339.14_CCAR1	4131.17	0.228943	0.0845847	2.70667	0.00679608	0.0519011	CCAR1
ENSG00000060491.17_OGFR	1559.18	-0.0876372	0.0892684	-0.981727	0.326234	0.602549	OGFR
ENSG00000060558.4_GNA15	5.54697	0.129263	0.911118	0.141873	0.88718	NA	GNA15
ENSG00000060566.14_CREB3L3	4.09566	0.892654	1.24647	0.716146	0.473901	NA	CREB3L3
ENSG00000060642.12_PIGV	218.457	-0.125498	0.176466	-0.71117	0.476979	0.732284	PIGV
ENSG00000060656.20_PTPRU	6714.99	-0.365457	0.0825056	-4.42949	9.44573e-06	0.000348233	PTPRU
ENSG00000060688.13_SNRNP40	2813.85	0.0507737	0.0855461	0.593524	0.552831	0.784258	SNRNP40
ENSG00000060709.17_RIMBP2	6.75449	-1.13551	0.91615	-1.23944	0.215183	NA	RIMBP2
ENSG00000060718.22_COL11A1	2.56825	-0.693989	1.34728	-0.515103	0.606481	NA	COL11A1
ENSG00000060749.17_QSER1	2961.31	-0.0234705	0.0926914	-0.253211	0.800105	0.922286	QSER1
ENSG00000060762.20_MPC1	615.831	0.0571496	0.111877	0.510824	0.609474	0.819349	MPC1
ENSG00000060971.19_ACAA1	618.614	0.131408	0.1169	1.1241	0.260969	0.535311	ACAA1
ENSG00000060982.15_BCAT1	3148.8	-0.755569	0.133054	-5.67868	1.3574e-08	1.76237e-06	BCAT1
ENSG00000061273.18_HDAC7	832.364	-0.139034	0.101494	-1.36988	0.170723	0.417196	HDAC7
ENSG00000061337.16_LZTS1	179.787	-0.0999587	0.185095	-0.540039	0.58917	0.807634	LZTS1
ENSG00000061455.11_PRDM6	474.257	0.0767563	0.146784	0.522918	0.601031	0.814263	PRDM6
ENSG00000061492.12_WNT8A	2.3514	0.24318	1.38691	0.175339	0.860813	NA	WNT8A
ENSG00000061656.11_SPAG4	39.5914	-0.499283	0.351261	-1.4214	0.1552	0.395307	SPAG4
ENSG00000061676.16_NCKAP1	2531.4	-0.191249	0.0908243	-2.1057	0.03523	0.158535	NCKAP1
ENSG00000061794.13_MRPS35	1083.51	0.214558	0.0929273	2.30888	0.0209501	0.111048	MRPS35
ENSG00000061918.14_GUCY1B1	828.467	-0.143209	0.102288	-1.40006	0.161496	0.40397	GUCY1B1
ENSG00000061936.10_SFSWAP	2756.97	0.0538542	0.079322	0.678932	0.497181	0.748026	SFSWAP
ENSG00000061938.21_TNK2	1677.02	0.157771	0.0829378	1.90228	0.0571342	0.214555	TNK2
ENSG00000061987.16_MON2	816.182	0.0756887	0.106588	0.710108	0.477637	0.732423	MON2
ENSG00000062038.15_CDH3	193.04	-0.213202	0.180896	-1.17859	0.238562	0.509187	CDH3
ENSG00000062096.15_ARSF	0	NA	NA	NA	NA	NA	ARSF
ENSG00000062194.16_GPBP1	2326.6	-0.0156582	0.0827631	-0.189193	0.849941	0.944091	GPBP1
ENSG00000062282.15_DGAT2	154.009	0.0639531	0.187084	0.341842	0.732469	0.888451	DGAT2
ENSG00000062370.17_ZNF112	129.333	0.293155	0.204798	1.43144	0.152305	0.390464	ZNF112
ENSG00000062485.19_CS	7840.86	-0.153884	0.068178	-2.25709	0.0240025	0.122243	CS
ENSG00000062524.16_LTK	98.6456	-0.222998	0.259964	-0.857802	0.391002	0.65855	LTK
ENSG00000062582.14_MRPS24	1727.31	-0.112284	0.0861812	-1.30288	0.192615	0.449576	MRPS24
ENSG00000062598.18_ELMO2	698.812	-0.131904	0.101114	-1.30451	0.19206	0.448883	ELMO2
ENSG00000062650.20_WAPL	2746.3	0.106342	0.0867476	1.22588	0.220245	0.486471	WAPL
ENSG00000062716.13_VMP1	1142.33	0.0166607	0.0912129	0.182657	0.855067	0.946125	VMP1
ENSG00000062725.10_APPBP2	989.267	0.187169	0.0945754	1.97904	0.0478113	0.193251	APPBP2
ENSG00000062822.16_POLD1	4130.02	-0.454897	0.0955938	-4.75865	1.94896e-06	9.69996e-05	POLD1
ENSG00000063015.21_SEZ6	4.62111	3.59099	1.40985	2.54707	0.010863	NA	SEZ6
ENSG00000063046.18_EIF4B	25835.8	-0.373415	0.0758131	-4.92546	8.416e-07	4.81454e-05	EIF4B
ENSG00000063127.16_SLC6A16	39.7145	-0.104039	0.35142	-0.296054	0.767189	0.906099	SLC6A16
ENSG00000063169.12_BICRA	1650.43	0.345241	0.114995	3.00222	0.00268023	0.0270379	BICRA
ENSG00000063176.16_SPHK2	511.401	0.0787964	0.11413	0.690409	0.489937	0.742212	SPHK2
ENSG00000063177.13_RPL18	15451.7	-0.272977	0.0874152	-3.12277	0.0017916	0.0201889	RPL18
ENSG00000063180.9_CA11	374.586	0.0242433	0.143314	0.169162	0.865669	0.950471	CA11
ENSG00000063241.8_ISOC2	654.474	-0.121193	0.114614	-1.05741	0.290326	0.56641	ISOC2
ENSG00000063244.14_U2AF2	9230.63	-0.0505305	0.0696458	-0.725536	0.468123	0.724982	U2AF2
ENSG00000063245.15_EPN1	3302.49	-0.250563	0.0989843	-2.53134	0.0113627	0.0732859	EPN1
ENSG00000063322.15_MED29	1510.23	0.0769715	0.0864297	0.890567	0.373161	0.644124	MED29
ENSG00000063438.20_AHRR	368.195	0.0083296	0.155776	0.0534715	0.957356	0.985341	AHRR
ENSG00000063515.3_GSC2	0.610246	-0.180624	2.93878	-0.0614621	0.950991	NA	GSC2
ENSG00000063587.15_ZNF275	1193.4	-0.177858	0.0872937	-2.03747	0.0416034	0.176171	ZNF275
ENSG00000063601.17_MTMR1	1961.72	-0.0277446	0.0800218	-0.346713	0.728807	0.886231	MTMR1
ENSG00000063660.9_GPC1	1049.37	-0.127115	0.10387	-1.22379	0.221031	0.487088	GPC1
ENSG00000063761.16_ADCK1	376.98	0.213713	0.128228	1.66666	0.0955819	0.295182	ADCK1
ENSG00000063854.13_HAGH	776.204	-0.189446	0.144201	-1.31377	0.188925	0.444367	HAGH
ENSG00000063978.17_RNF4	833.008	0.0193777	0.103455	0.187306	0.851421	0.944962	RNF4
ENSG00000064012.24_CASP8	277.636	0.0848227	0.155133	0.546773	0.584535	0.80484	CASP8
ENSG00000064042.18_LIMCH1	388.585	-0.13224	0.140979	-0.938012	0.348238	0.620175	LIMCH1
ENSG00000064102.15_INTS13	1817.35	0.0485189	0.0795557	0.609874	0.541945	0.778131	INTS13
ENSG00000064115.11_TM7SF3	1035.17	-0.179952	0.0993397	-1.81148	0.0700667	0.244203	TM7SF3
ENSG00000064195.7_DLX3	97.6235	0.37942	0.231008	1.64245	0.100497	0.304118	DLX3
ENSG00000064199.7_SPA17	567.814	0.27266	0.115692	2.35677	0.0184348	0.101704	SPA17
ENSG00000064201.16_TSPAN32	0.196822	-1.07794	4.08047	-0.26417	0.791649	NA	TSPAN32
ENSG00000064205.11_CCN5	0	NA	NA	NA	NA	NA	CCN5
ENSG00000064218.5_DMRT3	0.798396	1.7089	2.63505	0.648527	0.516644	NA	DMRT3
ENSG00000064225.13_ST3GAL6	292.459	0.151573	0.155845	0.972586	0.330759	0.606106	ST3GAL6
ENSG00000064270.13_ATP2C2	0.62603	0.151965	2.91604	0.0521134	0.958438	NA	ATP2C2
ENSG00000064300.9_NGFR	151.739	0.310304	0.192922	1.60844	0.107739	0.316501	NGFR
ENSG00000064309.16_CDON	939.854	-0.122202	0.113167	-1.07984	0.280213	0.555773	CDON
ENSG00000064313.13_TAF2	1715.92	0.197689	0.0826482	2.39194	0.0167597	0.0957668	TAF2
ENSG00000064393.16_HIPK2	3942.3	-0.243684	0.086947	-2.80267	0.00506812	0.0425754	HIPK2
ENSG00000064419.14_TNPO3	3222.3	-0.0592046	0.0706735	-0.837719	0.402188	0.66971	TNPO3
ENSG00000064489.23_BORCS8-MEF2B	305.053	0.218678	0.194195	1.12608	0.260134	0.534471	BORCS8-MEF2B
ENSG00000064490.14_RFXANK	940.267	-0.225126	0.111825	-2.01321	0.0440929	0.183283	RFXANK
ENSG00000064545.15_TMEM161A	1410.87	-0.18867	0.102786	-1.83556	0.0664222	0.236794	TMEM161A
ENSG00000064547.14_LPAR2	123.731	-0.281297	0.243381	-1.15579	0.247767	0.519799	LPAR2
ENSG00000064601.21_CTSA	783.904	-0.134611	0.149485	-0.900493	0.367858	0.639553	CTSA
ENSG00000064607.17_SUGP2	3420.75	0.0782358	0.0890864	0.878201	0.379835	0.649966	SUGP2
ENSG00000064651.14_SLC12A2	903.273	-0.170903	0.117239	-1.45773	0.144916	0.380738	SLC12A2
ENSG00000064652.11_SNX24	412.488	-0.14915	0.129624	-1.15064	0.249881	0.522766	SNX24
ENSG00000064655.19_EYA2	456.779	-0.0591205	0.130913	-0.451601	0.651556	0.843672	EYA2
ENSG00000064666.15_CNN2	1804.83	-0.155858	0.101644	-1.53337	0.125184	0.347292	CNN2
ENSG00000064687.13_ABCA7	943.058	-0.118425	0.10539	-1.12368	0.261148	0.535531	ABCA7
ENSG00000064692.20_SNCAIP	81.8294	-0.116027	0.27468	-0.422406	0.672729	0.855653	SNCAIP
ENSG00000064703.13_DDX20	1513.92	0.380214	0.0813767	4.67228	2.97878e-06	0.000138555	DDX20
ENSG00000064726.10_BTBD1	2800.66	-0.070708	0.0812704	-0.870034	0.384282	0.653297	BTBD1
ENSG00000064763.12_FAR2	663.336	-0.027465	0.108866	-0.252283	0.800822	0.922585	FAR2
ENSG00000064787.14_BCAS1	64.8183	-0.416639	0.28666	-1.45342	0.146106	0.382386	BCAS1
ENSG00000064835.12_POU1F1	0.183751	-1.07794	4.08047	-0.26417	0.791649	NA	POU1F1
ENSG00000064886.14_CHI3L2	1.48683	1.74199	2.00922	0.866999	0.385943	NA	CHI3L2
ENSG00000064932.16_SBNO2	1603.92	-0.0918908	0.0985571	-0.932361	0.35115	0.623279	SBNO2
ENSG00000064933.19_PMS1	775.191	0.310569	0.102458	3.0312	0.00243582	0.0251343	PMS1
ENSG00000064961.19_HMG20B	3844.22	-0.231372	0.109645	-2.1102	0.0348413	0.157361	HMG20B
ENSG00000064989.13_CALCRL	36.9678	-0.305205	0.440518	-0.692832	0.488415	0.74096	CALCRL
ENSG00000064995.19_TAF11	1043.35	0.0690695	0.108543	0.636333	0.524559	0.767883	TAF11
ENSG00000064999.16_ANKS1A	1626.36	-0.0500195	0.0863868	-0.579018	0.562577	0.79046	ANKS1A
ENSG00000065000.20_AP3D1	8502.82	-0.0138075	0.0780853	-0.176825	0.859645	0.947958	AP3D1
ENSG00000065029.15_ZNF76	1311.49	-0.0141535	0.0914482	-0.154771	0.877002	0.955804	ZNF76
ENSG00000065054.14_NHERF2	1351.45	-0.191702	0.0999245	-1.91847	0.0550512	0.210247	NHERF2
ENSG00000065057.9_NTHL1	576.947	-0.196061	0.113073	-1.73393	0.0829314	0.271011	NTHL1
ENSG00000065060.18_BLTP3A	2157.31	-0.29096	0.108656	-2.6778	0.0074107	0.0551672	BLTP3A
ENSG00000065135.12_GNAI3	1892.85	-0.0685087	0.0841602	-0.814027	0.415629	0.680793	GNAI3
ENSG00000065150.21_IPO5	9156.64	-0.201744	0.0680425	-2.96497	0.00302713	0.0294835	IPO5
ENSG00000065154.12_OAT	1899.49	-0.183015	0.0842689	-2.17179	0.0298712	0.141797	OAT
ENSG00000065183.16_WDR3	3452.21	0.0210019	0.0817893	0.256781	0.797348	0.92174	WDR3
ENSG00000065243.20_PKN2	2141.6	-0.0395935	0.0912781	-0.433768	0.664457	0.851151	PKN2
ENSG00000065268.11_WDR18	1864	-0.244894	0.0951671	-2.57331	0.0100731	0.0675656	WDR18
ENSG00000065308.5_TRAM2	654.082	-0.080605	0.115546	-0.697601	0.485427	0.738691	TRAM2
ENSG00000065320.9_NTN1	1331.11	-0.364119	0.107584	-3.38452	0.000713035	0.010175	NTN1
ENSG00000065325.13_GLP2R	0.445564	-0.789467	3.57991	-0.220527	0.825461	NA	GLP2R
ENSG00000065328.17_MCM10	2365.56	0.248429	0.0789058	3.14843	0.00164151	0.0189995	MCM10
ENSG00000065357.20_DGKA	254.691	-0.294535	0.147781	-1.99306	0.0462553	0.189319	DGKA
ENSG00000065361.17_ERBB3	347.972	-0.244403	0.141024	-1.73306	0.0830854	0.271336	ERBB3
ENSG00000065371.18_ROPN1	0.51511	0.776984	3.39273	0.229014	0.818858	NA	ROPN1
ENSG00000065413.20_ANKRD44	172.008	0.244577	0.192767	1.26877	0.204523	0.464941	ANKRD44
ENSG00000065427.15_KARS1	4229.56	0.108484	0.0699073	1.55182	0.120705	0.339281	KARS1
ENSG00000065457.11_ADAT1	606.201	0.0510072	0.133778	0.381282	0.702994	0.872142	ADAT1
ENSG00000065485.20_PDIA5	1037.49	-0.422771	0.102208	-4.13636	3.52853e-05	0.00100928	PDIA5
ENSG00000065491.8_TBC1D22B	666.588	0.232713	0.109577	2.12374	0.0336916	0.153967	TBC1D22B
ENSG00000065518.8_NDUFB4	1306.9	-0.00340646	0.0934793	-0.0364408	0.970931	0.989987	NDUFB4
ENSG00000065526.13_SPEN	12573.5	0.146317	0.0984038	1.48691	0.137039	0.367612	SPEN
ENSG00000065534.20_MYLK	732.407	-0.466664	0.133356	-3.49939	0.000466324	0.00751099	MYLK
ENSG00000065548.18_ZC3H15	2801.63	0.139138	0.0777868	1.78872	0.0736607	0.252092	ZC3H15
ENSG00000065559.15_MAP2K4	796.409	0.350718	0.10558	3.32183	0.000894288	0.011997	MAP2K4
ENSG00000065600.13_PACC1	517.295	-0.318994	0.113185	-2.81833	0.00482739	0.0409286	PACC1
ENSG00000065609.15_SNAP91	87.6936	0.0959659	0.259253	0.370163	0.711261	0.877169	SNAP91
ENSG00000065613.15_SLK	3783.52	-8.04289e-05	0.0784597	-0.0010251	0.999182	0.999839	SLK
ENSG00000065615.14_CYB5R4	314.618	-0.0226846	0.146394	-0.154956	0.876856	0.955715	CYB5R4
ENSG00000065618.21_COL17A1	0.825716	0.571018	2.45016	0.233053	0.81572	NA	COL17A1
ENSG00000065621.15_GSTO2	95.611	-0.475599	0.245726	-1.93548	0.052931	0.205063	GSTO2
ENSG00000065665.21_SEC61A2	178.813	0.539957	0.185373	2.91281	0.00358196	0.0332188	SEC61A2
ENSG00000065675.16_PRKCQ	254.296	0.0350458	0.15599	0.224666	0.822239	0.932427	PRKCQ
ENSG00000065717.16_TLE2	636.544	-0.399697	0.116307	-3.43658	0.000589119	0.008994	TLE2
ENSG00000065802.12_ASB1	672.486	0.164945	0.108184	1.52467	0.127341	0.350411	ASB1
ENSG00000065809.14_FAM107B	655.179	-0.159817	0.108033	-1.47934	0.139049	0.371404	FAM107B
ENSG00000065833.9_ME1	352.815	-0.230336	0.131193	-1.7557	0.0791399	0.263406	ME1
ENSG00000065882.18_TBC1D1	1116.09	-0.219759	0.108074	-2.03341	0.0420111	0.177344	TBC1D1
ENSG00000065883.18_CDK13	1531.97	-0.177957	0.0830603	-2.1425	0.0321533	0.149066	CDK13
ENSG00000065911.13_MTHFD2	8233.26	-0.6389	0.108203	-5.90464	3.53411e-09	5.43998e-07	MTHFD2
ENSG00000065923.10_SLC9A7	455.439	-0.19609	0.142829	-1.37291	0.169782	0.416149	SLC9A7
ENSG00000065970.9_FOXJ2	932.076	0.0627966	0.108655	0.577946	0.563301	0.790964	FOXJ2
ENSG00000065978.19_YBX1	41926	-0.0229398	0.0645291	-0.355496	0.722218	0.882226	YBX1
ENSG00000065989.16_PDE4A	545.044	-0.0956976	0.115244	-0.830395	0.406316	0.672509	PDE4A
ENSG00000066027.12_PPP2R5A	608.852	0.0131737	0.122382	0.107645	0.914278	0.969675	PPP2R5A
ENSG00000066032.19_CTNNA2	0	NA	NA	NA	NA	NA	CTNNA2
ENSG00000066044.15_ELAVL1	3556.76	-0.00460875	0.0728552	-0.063259	0.94956	0.98246	ELAVL1
ENSG00000066056.15_TIE1	0.66172	2.78418	2.77563	1.00308	0.315823	NA	TIE1
ENSG00000066084.13_DIP2B	1773.35	-0.040033	0.0863873	-0.463413	0.643068	0.839819	DIP2B
ENSG00000066117.15_SMARCD1	3015.38	-0.111089	0.0783753	-1.41739	0.156368	0.397197	SMARCD1
ENSG00000066135.13_KDM4A	2310.98	-0.292774	0.0915847	-3.19676	0.0013898	0.0167212	KDM4A
ENSG00000066136.21_NFYC	1567.11	0.122133	0.0847169	1.44166	0.149398	0.386877	NFYC
ENSG00000066185.13_ZMYND12	11.2749	0.975233	0.672282	1.45063	0.146883	NA	ZMYND12
ENSG00000066230.12_SLC9A3	187.18	-0.2549	0.187191	-1.36171	0.173288	0.420504	SLC9A3
ENSG00000066248.15_NGEF	322.369	-0.30075	0.15973	-1.88286	0.0597189	0.221037	NGEF
ENSG00000066279.19_ASPM	3255.53	0.196785	0.119007	1.65356	0.0982175	0.299772	ASPM
ENSG00000066294.15_CD84	0	NA	NA	NA	NA	NA	CD84
ENSG00000066322.15_ELOVL1	688.98	0.0671594	0.110551	0.607496	0.543522	0.779225	ELOVL1
ENSG00000066336.13_SPI1	3.78778	-0.271755	1.09541	-0.248085	0.804068	NA	SPI1
ENSG00000066379.15_POLR1H	300.818	-0.197209	0.177732	-1.10959	0.267177	0.541939	POLR1H
ENSG00000066382.17_MPPED2	151.727	-0.270868	0.209539	-1.29269	0.196119	0.453853	MPPED2
ENSG00000066405.13_CLDN18	0	NA	NA	NA	NA	NA	CLDN18
ENSG00000066422.7_ZBTB11	1676.25	0.0472459	0.0908025	0.520315	0.602844	0.815434	ZBTB11
ENSG00000066427.25_ATXN3	465.639	-0.0783838	0.130656	-0.599926	0.548556	0.78259	ATXN3
ENSG00000066455.13_GOLGA5	1151.93	-0.00517944	0.0907279	-0.0570876	0.954475	0.98439	GOLGA5
ENSG00000066468.24_FGFR2	718.732	-0.0852828	0.110052	-0.774934	0.438379	0.700966	FGFR2
ENSG00000066557.6_LRRC40	1246.08	0.182532	0.08916	2.04724	0.0406349	0.173945	LRRC40
ENSG00000066583.12_ISOC1	966.803	-0.139868	0.0936574	-1.4934	0.135333	0.364213	ISOC1
ENSG00000066629.19_EML1	945.94	0.134308	0.10333	1.29979	0.193673	0.450705	EML1
ENSG00000066651.20_TRMT11	470.536	0.210106	0.122212	1.71919	0.0855796	0.276518	TRMT11
ENSG00000066654.14_THUMPD1	1054.51	0.0337474	0.100549	0.33563	0.73715	0.890844	THUMPD1
ENSG00000066697.15_MSANTD3	412.757	-0.0224885	0.128553	-0.174935	0.861131	0.948647	MSANTD3
ENSG00000066735.16_KIF26A	1719.36	-0.140014	0.0832456	-1.68194	0.0925795	0.289718	KIF26A
ENSG00000066739.12_ATG2B	1163.33	-0.0810551	0.105271	-0.769966	0.44132	0.702639	ATG2B
ENSG00000066777.9_ARFGEF1	1235.37	0.0466597	0.0966589	0.482725	0.629291	0.830324	ARFGEF1
ENSG00000066813.14_ACSM2B	0	NA	NA	NA	NA	NA	ACSM2B
ENSG00000066827.16_ZFAT	393.582	0.127088	0.131311	0.967843	0.333123	0.607679	ZFAT
ENSG00000066855.16_MTFR1	1097.66	-0.345201	0.096429	-3.57984	0.000343801	0.00592075	MTFR1
ENSG00000066923.19_STAG3	39.7679	-0.787463	0.405361	-1.94262	0.052062	0.203307	STAG3
ENSG00000066926.13_FECH	875.414	-0.329485	0.0973243	-3.38544	0.000710655	0.0101709	FECH
ENSG00000066933.17_MYO9A	1158.75	0.0608888	0.103226	0.589862	0.555283	0.785614	MYO9A
ENSG00000067048.17_DDX3Y	0	NA	NA	NA	NA	NA	DDX3Y
ENSG00000067057.19_PFKP	2466.47	-0.191619	0.0779072	-2.45958	0.01391	0.0844615	PFKP
ENSG00000067064.13_IDI1	1127.98	0.289229	0.304917	0.94855	0.34285	0.615678	IDI1
ENSG00000067066.17_SP100	2.32561	1.26106	1.50247	0.839325	0.401287	NA	SP100
ENSG00000067082.15_KLF6	703.559	0.1355	0.10545	1.28497	0.198802	0.458002	KLF6
ENSG00000067113.17_PLPP1	163.58	0.0547537	0.184002	0.297571	0.766031	0.905232	PLPP1
ENSG00000067141.17_NEO1	2277.55	-0.191133	0.0971263	-1.96788	0.0490824	0.195757	NEO1
ENSG00000067167.8_TRAM1	2934.36	-0.103898	0.0736603	-1.41051	0.15839	0.400143	TRAM1
ENSG00000067177.15_PHKA1	981.917	-0.339794	0.100314	-3.38729	0.000705867	0.0101339	PHKA1
ENSG00000067182.9_TNFRSF1A	846.654	-0.10906	0.128428	-0.849192	0.395774	0.663669	TNFRSF1A
ENSG00000067191.17_CACNB1	289.908	0.734012	0.161742	4.53817	5.67438e-06	0.000230856	CACNB1
ENSG00000067208.17_EVI5	606.44	-0.022851	0.123561	-0.184937	0.853278	0.945547	EVI5
ENSG00000067221.14_STOML1	242.199	0.497154	0.180573	2.75321	0.00590149	0.0470952	STOML1
ENSG00000067225.21_PKM	27229.9	0.0713201	0.0961527	0.741738	0.458246	0.716598	PKM
ENSG00000067248.11_DHX29	1118.21	0.357159	0.099166	3.60163	0.00031623	0.00554833	DHX29
ENSG00000067334.14_DNTTIP2	2625.11	0.283362	0.0856522	3.30828	0.000938693	0.0124252	DNTTIP2
ENSG00000067365.15_METTL22	445.188	0.449495	0.139744	3.21656	0.00129736	0.0158517	METTL22
ENSG00000067369.14_TP53BP1	1527.64	-0.12642	0.0934733	-1.35247	0.176224	0.425232	TP53BP1
ENSG00000067445.22_TRO	646.351	-0.036232	0.10905	-0.332251	0.7397	0.892585	TRO
ENSG00000067533.6_RRP15	1496.54	0.0438529	0.0923757	0.474724	0.634984	0.833856	RRP15
ENSG00000067560.14_RHOA	8477.46	-0.217629	0.0714077	-3.04769	0.00230606	0.0241796	RHOA
ENSG00000067596.12_DHX8	2194.57	0.0892297	0.0802258	1.11223	0.266039	0.540586	DHX8
ENSG00000067601.11_PMS2P4	0.159144	0.845613	4.08047	0.207234	0.835827	NA	PMS2P4
ENSG00000067606.17_PRKCZ	1354.58	0.122984	0.107097	1.14835	0.250825	0.523859	PRKCZ
ENSG00000067646.12_ZFY	0	NA	NA	NA	NA	NA	ZFY
ENSG00000067704.10_IARS2	4141.89	-0.226708	0.0802483	-2.82507	0.00472697	0.0403535	IARS2
ENSG00000067715.15_SYT1	176.133	0.0158069	0.205944	0.0767532	0.93882	0.978668	SYT1
ENSG00000067798.16_NAV3	4.88356	-0.0796325	0.979452	-0.0813031	0.935201	NA	NAV3
ENSG00000067829.20_IDH3G	2121.67	-0.0777682	0.11592	-0.670878	0.502298	0.751862	IDH3G
ENSG00000067836.13_ROGDI	399.371	-0.338633	0.127553	-2.65485	0.00793442	0.0573699	ROGDI
ENSG00000067840.13_PDZD4	656.245	-0.274751	0.107287	-2.5609	0.0104401	0.0689806	PDZD4
ENSG00000067842.19_ATP2B3	29.933	0.173837	0.42835	0.405829	0.684868	0.862715	ATP2B3
ENSG00000067900.9_ROCK1	3095.6	0.0324199	0.0763465	0.424642	0.671097	0.85467	ROCK1
ENSG00000067955.15_CBFB	1077.1	-0.0739383	0.0985397	-0.750341	0.453049	0.712276	CBFB
ENSG00000067992.17_PDK3	1186.17	-0.107791	0.0930831	-1.15801	0.246862	0.519067	PDK3
ENSG00000068001.14_HYAL2	560.365	0.0814016	0.119801	0.679473	0.496838	0.747764	HYAL2
ENSG00000068024.18_HDAC4	412.469	0.217543	0.140186	1.55182	0.120706	0.339281	HDAC4
ENSG00000068028.18_RASSF1	742.497	1.29608	0.124819	10.3836	2.94312e-25	8.78874e-22	RASSF1
ENSG00000068078.20_FGFR3	1895.18	-0.079536	0.077702	-1.0236	0.306023	0.582113	FGFR3
ENSG00000068079.8_IFI35	64.2306	-0.981741	0.285042	-3.4442	0.000572757	0.00880724	IFI35
ENSG00000068097.16_HEATR6	1014.26	-0.0902844	0.0906459	-0.996013	0.319244	0.595457	HEATR6
ENSG00000068120.15_COASY	2495.51	-0.250361	0.084044	-2.97893	0.0028926	0.0285078	COASY
ENSG00000068137.15_PLEKHH3	778.375	0.079768	0.115826	0.688687	0.49102	0.743019	PLEKHH3
ENSG00000068305.19_MEF2A	1312.4	0.114457	0.0863247	1.32589	0.184875	0.437806	MEF2A
ENSG00000068308.15_OTUD5	2364.02	-0.041055	0.0806018	-0.509356	0.610503	0.819349	OTUD5
ENSG00000068323.17_TFE3	1467.85	0.260346	0.0946505	2.7506	0.00594856	0.0474161	TFE3
ENSG00000068354.16_TBC1D25	434.755	-0.187461	0.124444	-1.50639	0.131967	0.358451	TBC1D25
ENSG00000068366.21_ACSL4	1818.35	-0.214747	0.0899156	-2.38832	0.0169257	0.0962734	ACSL4
ENSG00000068383.19_INPP5A	850.981	-0.0588175	0.0981967	-0.598976	0.549189	0.782692	INPP5A
ENSG00000068394.11_GPKOW	1072.73	0.0330595	0.0919607	0.359496	0.719224	0.880985	GPKOW
ENSG00000068400.14_GRIPAP1	1889.65	-0.0985395	0.0956627	-1.03007	0.302976	0.579416	GRIPAP1
ENSG00000068438.15_FTSJ1	1411.97	-0.166125	0.0848332	-1.95826	0.0501998	0.198475	FTSJ1
ENSG00000068489.13_PRR11	1629.91	-0.0695966	0.0906042	-0.768139	0.442405	0.703691	PRR11
ENSG00000068615.20_REEP1	333.665	-0.0928641	0.13128	-0.707373	0.479335	0.733868	REEP1
ENSG00000068650.19_ATP11A	1486.39	-0.133291	0.0940318	-1.41751	0.156335	0.397181	ATP11A
ENSG00000068654.17_POLR1A	3274.6	-0.141962	0.0732931	-1.9369	0.0527573	0.204762	POLR1A
ENSG00000068697.7_LAPTM4A	935.699	-0.130063	0.114481	-1.13611	0.255909	0.530305	LAPTM4A
ENSG00000068724.18_TTC7A	570.763	-0.022375	0.113611	-0.196944	0.843871	0.941515	TTC7A
ENSG00000068745.15_IP6K2	1478.59	0.252377	0.0901168	2.80055	0.00510155	0.0426969	IP6K2
ENSG00000068781.21_STON1-GTF2A1L	5.58615	-0.185574	1.27693	-0.145328	0.884452	NA	STON1-GTF2A1L
ENSG00000068784.13_SRBD1	1488.55	0.040234	0.0889344	0.452401	0.65098	0.843427	SRBD1
ENSG00000068796.19_KIF2A	3065.29	-0.168682	0.0779387	-2.1643	0.0304416	0.143746	KIF2A
ENSG00000068831.19_RASGRP2	147.719	-0.321229	0.18887	-1.70079	0.0889823	0.283162	RASGRP2
ENSG00000068878.15_PSME4	2530.56	0.130816	0.083875	1.55966	0.118841	0.335554	PSME4
ENSG00000068885.15_IFT80	1061.63	0.0367034	0.0908467	0.404014	0.686202	0.863235	IFT80
ENSG00000068903.21_SIRT2	837.259	-0.329008	0.112424	-2.92649	0.00342806	0.0321308	SIRT2
ENSG00000068912.15_ERLEC1	818.929	-0.0604226	0.0969201	-0.623427	0.533004	0.773095	ERLEC1
ENSG00000068971.14_PPP2R5B	445.869	0.438945	0.154757	2.83635	0.0045633	0.0392264	PPP2R5B
ENSG00000068976.14_PYGM	69.0805	-0.139405	0.320632	-0.434781	0.663722	0.851151	PYGM
ENSG00000068985.5_PAGE1	0	NA	NA	NA	NA	NA	PAGE1
ENSG00000069011.16_PITX1	906.084	0.165374	0.0985305	1.67841	0.0932678	0.29138	PITX1
ENSG00000069018.19_TRPC7	0	NA	NA	NA	NA	NA	TRPC7
ENSG00000069020.19_MAST4	448.47	0.0874381	0.130524	0.669901	0.502921	0.752341	MAST4
ENSG00000069122.19_ADGRF5	3.21364	-0.178896	1.2754	-0.140266	0.88845	NA	ADGRF5
ENSG00000069188.17_SDK2	1782.08	-0.23656	0.115382	-2.05023	0.0403416	0.173429	SDK2
ENSG00000069206.15_ADAM7	0	NA	NA	NA	NA	NA	ADAM7
ENSG00000069248.12_NUP133	2910.22	-0.0577617	0.0775688	-0.744652	0.456482	0.715279	NUP133
ENSG00000069275.13_NUCKS1	17893.3	-0.274337	0.0818029	-3.35364	0.000797562	0.0110161	NUCKS1
ENSG00000069329.19_VPS35	2623.24	-0.0748539	0.0745541	-1.00402	0.315369	0.591331	VPS35
ENSG00000069345.12_DNAJA2	2162.24	0.0588539	0.0825804	0.712686	0.47604	0.731777	DNAJA2
ENSG00000069399.15_BCL3	57.6129	-0.133694	0.311432	-0.429288	0.667714	0.852849	BCL3
ENSG00000069424.16_KCNAB2	396.348	-0.514877	0.137959	-3.73211	0.000189881	0.00376669	KCNAB2
ENSG00000069431.14_ABCC9	10.7866	-0.0137704	0.707913	-0.019452	0.98448	NA	ABCC9
ENSG00000069482.7_GAL	1246.23	0.00647533	0.109276	0.0592569	0.952747	0.983713	GAL
ENSG00000069493.15_CLEC2D	61.4176	0.262792	0.330912	0.794145	0.427111	0.690555	CLEC2D
ENSG00000069509.6_FUNDC1	524.975	0.113939	0.124625	0.914253	0.360584	0.632137	FUNDC1
ENSG00000069535.14_MAOB	62.0039	-0.257165	0.31047	-0.828306	0.407497	0.673344	MAOB
ENSG00000069667.16_RORA	161.933	0.122547	0.205356	0.596753	0.550672	0.782907	RORA
ENSG00000069696.7_DRD4	16.7751	0.0892515	0.527379	0.169236	0.865611	NA	DRD4
ENSG00000069702.11_TGFBR3	939.989	-0.0503358	0.114613	-0.439181	0.66053	0.849034	TGFBR3
ENSG00000069764.10_PLA2G10	0	NA	NA	NA	NA	NA	PLA2G10
ENSG00000069812.11_HES2	116.058	-0.302959	0.223725	-1.35416	0.175685	0.424322	HES2
ENSG00000069849.11_ATP1B3	2894.03	-0.0484608	0.0883092	-0.548763	0.583168	0.80415	ATP1B3
ENSG00000069869.17_NEDD4	453.371	-0.263777	0.140156	-1.88203	0.0598321	0.221236	NEDD4
ENSG00000069943.10_PIGB	97.2831	0.343091	0.227531	1.50788	0.131584	0.357913	PIGB
ENSG00000069956.14_MAPK6	1174.09	0.05629	0.095211	0.591213	0.554378	0.785333	MAPK6
ENSG00000069966.19_GNB5	327.639	-0.29322	0.145443	-2.01606	0.0437942	0.182396	GNB5
ENSG00000069974.17_RAB27A	101.31	-0.17162	0.222381	-0.77174	0.440269	0.701782	RAB27A
ENSG00000069998.12_HDHD5	1652.05	-0.0856871	0.0837358	-1.0233	0.306164	0.582113	HDHD5
ENSG00000070010.19_UFD1	1681.88	0.337459	0.118356	2.85121	0.00435534	0.038029	UFD1
ENSG00000070018.9_LRP6	1651.04	0.047978	0.105215	0.456	0.64839	0.84236	LRP6
ENSG00000070019.5_GUCY2C	0.818571	0.185833	2.84515	0.0653156	0.947923	NA	GUCY2C
ENSG00000070031.4_SCT	0	NA	NA	NA	NA	NA	SCT
ENSG00000070047.13_PHRF1	2181.41	0.230094	0.0818316	2.8118	0.00492653	0.0415817	PHRF1
ENSG00000070061.16_ELP1	2332.82	-0.195116	0.0807094	-2.41751	0.0156272	0.0912159	ELP1
ENSG00000070081.18_NUCB2	1607.16	-0.203632	0.0988476	-2.06007	0.0393923	0.171377	NUCB2
ENSG00000070087.15_PFN2	2441.99	-0.138365	0.080322	-1.72263	0.0849553	0.275335	PFN2
ENSG00000070159.14_PTPN3	750.922	-0.0270007	0.106307	-0.253987	0.799505	0.922022	PTPN3
ENSG00000070182.21_SPTB	600.865	-0.338756	0.145553	-2.32737	0.0199457	0.107551	SPTB
ENSG00000070190.13_DAPP1	0	NA	NA	NA	NA	NA	DAPP1
ENSG00000070193.5_FGF10	0.183751	-1.07794	4.08047	-0.26417	0.791649	NA	FGF10
ENSG00000070214.17_SLC44A1	1147.05	-0.207378	0.100376	-2.06602	0.0388263	0.169458	SLC44A1
ENSG00000070269.14_TMEM260	396.876	0.270513	0.125461	2.15615	0.0310716	0.145753	TMEM260
ENSG00000070366.14_SMG6	1275.42	-0.0241787	0.088606	-0.272878	0.784947	0.916559	SMG6
ENSG00000070367.17_EXOC5	1530.35	-0.0617475	0.0910758	-0.677979	0.497785	0.748633	EXOC5
ENSG00000070371.16_CLTCL1	649.85	-0.000765232	0.106488	-0.0071861	0.994266	0.998866	CLTCL1
ENSG00000070388.12_FGF22	13.6033	-0.374778	0.6517	-0.575078	0.565238	NA	FGF22
ENSG00000070404.10_FSTL3	387.66	0.465798	0.144453	3.22457	0.00126163	0.0155552	FSTL3
ENSG00000070413.21_DGCR2	2487.78	-0.0683331	0.0786874	-0.868412	0.385169	0.653964	DGCR2
ENSG00000070423.18_RNF126	2249.41	-0.187736	0.0987346	-1.90142	0.0572471	0.214817	RNF126
ENSG00000070444.15_MNT	1130.9	-0.105749	0.0981081	-1.07788	0.281088	0.556855	MNT
ENSG00000070476.15_ZXDC	1219.15	0.0426696	0.097726	0.436625	0.662383	0.850478	ZXDC
ENSG00000070495.15_JMJD6	1057.38	0.394526	0.0990183	3.98437	6.76596e-05	0.00172984	JMJD6
ENSG00000070501.12_POLB	595.606	0.147808	0.121772	1.21381	0.22482	0.491622	POLB
ENSG00000070526.15_ST6GALNAC1	1.04271	-1.15395	2.13186	-0.541288	0.588309	NA	ST6GALNAC1
ENSG00000070540.13_WIPI1	54.9462	0.0189679	0.315472	0.0601253	0.952056	0.983407	WIPI1
ENSG00000070601.10_FRMPD1	62.4036	-0.181084	0.30339	-0.596869	0.550595	0.782893	FRMPD1
ENSG00000070610.14_GBA2	1101.27	-0.161365	0.0910015	-1.77321	0.0761935	0.257193	GBA2
ENSG00000070614.15_NDST1	2255.78	-0.11787	0.0850801	-1.3854	0.165932	0.410798	NDST1
ENSG00000070669.17_ASNS	6500.79	-1.12554	0.122036	-9.22303	2.88811e-20	3.92022e-17	ASNS
ENSG00000070718.13_AP3M2	823.877	-0.212324	0.102306	-2.07539	0.0379507	0.166833	AP3M2
ENSG00000070729.14_CNGB1	5.08986	-0.486841	1.02946	-0.472908	0.636279	NA	CNGB1
ENSG00000070731.11_ST6GALNAC2	28.193	-0.468697	0.460375	-1.01808	0.308641	0.584714	ST6GALNAC2
ENSG00000070748.19_CHAT	0.180466	0.845613	4.08047	0.207234	0.835827	NA	CHAT
ENSG00000070756.17_PABPC1	44135.9	-0.344722	0.0752551	-4.58071	4.63394e-06	0.000197707	PABPC1
ENSG00000070759.17_TESK2	230.336	-0.023194	0.179026	-0.129557	0.896917	0.962637	TESK2
ENSG00000070761.8_CFAP20	1345.16	0.321798	0.107412	2.99594	0.00273603	0.0273988	CFAP20
ENSG00000070770.10_CSNK2A2	2661.37	-0.123736	0.0886393	-1.39595	0.162728	0.405897	CSNK2A2
ENSG00000070778.13_PTPN21	315.512	0.48129	0.137079	3.51104	0.000446353	0.00724518	PTPN21
ENSG00000070785.17_EIF2B3	714.455	0.194085	0.112986	1.71778	0.0858365	0.276749	EIF2B3
ENSG00000070808.17_CAMK2A	1.77271	0.217613	1.56579	0.138979	0.889466	NA	CAMK2A
ENSG00000070814.22_TCOF1	9825.46	0.00267708	0.0750755	0.0356585	0.971555	0.990241	TCOF1
ENSG00000070831.18_CDC42	2055.29	-0.101148	0.102204	-0.989667	0.322337	0.598548	CDC42
ENSG00000070882.13_OSBPL3	776.012	-0.0480228	0.104373	-0.460108	0.645439	0.841076	OSBPL3
ENSG00000070886.12_EPHA8	369.786	-0.283115	0.131766	-2.14861	0.0316653	0.147698	EPHA8
ENSG00000070915.10_SLC12A3	1.12979	0.283782	2.15155	0.131896	0.895066	NA	SLC12A3
ENSG00000070950.10_RAD18	736.732	0.235265	0.102291	2.29996	0.0214507	0.112974	RAD18
ENSG00000070961.17_ATP2B1	2411.1	-0.147886	0.0812979	-1.81906	0.0689018	0.24178	ATP2B1
ENSG00000070985.14_TRPM5	2.88213	-0.0830314	1.2437	-0.0667617	0.946771	NA	TRPM5
ENSG00000071051.14_NCK2	980.072	-0.0791349	0.0959627	-0.824643	0.409574	0.675042	NCK2
ENSG00000071054.17_MAP4K4	5073.95	-0.0886286	0.0712358	-1.24416	0.213442	0.477509	MAP4K4
ENSG00000071073.13_MGAT4A	339.126	0.0286849	0.134328	0.213544	0.830903	0.935259	MGAT4A
ENSG00000071082.11_RPL31	10209.9	-0.318497	0.0710928	-4.48002	7.46363e-06	0.000292492	RPL31
ENSG00000071127.18_WDR1	3225.07	-0.0487053	0.0742691	-0.655795	0.511956	0.758405	WDR1
ENSG00000071189.21_SNX13	821.615	-0.00562468	0.110793	-0.0507675	0.959511	0.986263	SNX13
ENSG00000071203.9_MS4A12	0	NA	NA	NA	NA	NA	MS4A12
ENSG00000071205.12_ARHGAP10	467.336	0.267378	0.124144	2.15377	0.0312581	0.146535	ARHGAP10
ENSG00000071242.13_RPS6KA2	860.379	-0.690554	0.166652	-4.1437	3.41753e-05	0.000981291	RPS6KA2
ENSG00000071243.16_ING3	472.486	0.173016	0.121234	1.42712	0.153546	0.392567	ING3
ENSG00000071246.11_VASH1	950.399	-0.376205	0.106149	-3.54412	0.000393929	0.00661546	VASH1
ENSG00000071282.12_LMCD1	193.077	0.0740522	0.178431	0.415019	0.678128	0.858705	LMCD1
ENSG00000071462.13_BUD23	2119.33	-0.124075	0.0987142	-1.25691	0.208787	0.471048	BUD23
ENSG00000071537.14_SEL1L	1357.09	-0.218678	0.133949	-1.63254	0.102565	0.307448	SEL1L
ENSG00000071539.14_TRIP13	1512.51	-0.143751	0.0841179	-1.70893	0.0874644	0.280148	TRIP13
ENSG00000071553.18_ATP6AP1	3469.12	-0.109527	0.0908939	-1.205	0.228203	0.496257	ATP6AP1
ENSG00000071564.19_TCF3	2891.23	-0.17339	0.076802	-2.25763	0.0239687	0.122142	TCF3
ENSG00000071575.12_TRIB2	44.2302	-0.418836	0.367776	-1.13884	0.254772	0.5287	TRIB2
ENSG00000071626.17_DAZAP1	6742.68	-0.0378567	0.0667239	-0.567363	0.570467	0.795596	DAZAP1
ENSG00000071655.18_MBD3	1578.72	-0.108867	0.107913	-1.00884	0.31305	0.589204	MBD3
ENSG00000071677.1_PRLH	0	NA	NA	NA	NA	NA	PRLH
ENSG00000071794.16_HLTF	4424.02	-0.314607	0.099168	-3.17246	0.00151153	0.0177846	HLTF
ENSG00000071859.15_FAM50A	3771.22	-0.107521	0.0971484	-1.10677	0.268395	0.543376	FAM50A
ENSG00000071889.17_FAM3A	1271.83	-0.192939	0.094216	-2.04784	0.0405759	0.173914	FAM3A
ENSG00000071894.17_CPSF1	4528.08	-0.298827	0.078107	-3.82587	0.000130312	0.00284875	CPSF1
ENSG00000071909.19_MYO3B	0.892819	-2.0793	2.57294	-0.808141	0.419009	NA	MYO3B
ENSG00000071967.12_CYBRD1	77.1788	-0.68812	0.262136	-2.62505	0.0086636	0.0609596	CYBRD1
ENSG00000071991.9_CDH19	0.541399	2.48502	3.60558	0.689217	0.490687	NA	CDH19
ENSG00000071994.11_PDCD2	1781.75	0.0714517	0.0854353	0.836325	0.402972	0.669796	PDCD2
ENSG00000072041.18_SLC6A15	2004.66	-0.187272	0.0872422	-2.14658	0.0318267	0.147947	SLC6A15
ENSG00000072042.13_RDH11	1856.92	0.112701	0.0807122	1.39633	0.162614	0.405679	RDH11
ENSG00000072062.16_PRKACA	2522.81	0.0649225	0.0838134	0.774608	0.438571	0.700966	PRKACA
ENSG00000072071.17_ADGRL1	4302.4	-0.181345	0.0868353	-2.08838	0.0367635	0.163222	ADGRL1
ENSG00000072080.11_SPP2	0	NA	NA	NA	NA	NA	SPP2
ENSG00000072110.16_ACTN1	3939.55	-0.219728	0.0701736	-3.13121	0.00174086	0.0197734	ACTN1
ENSG00000072121.17_ZFYVE26	1055.33	-0.155583	0.093653	-1.66127	0.0966586	0.297328	ZFYVE26
ENSG00000072133.12_RPS6KA6	223.502	-0.092418	0.173224	-0.533517	0.593676	0.809891	RPS6KA6
ENSG00000072134.16_EPN2	952.856	-0.0463139	0.0967054	-0.478918	0.631997	0.831942	EPN2
ENSG00000072135.13_PTPN18	1075.78	-0.535782	0.0976183	-5.48854	4.05261e-08	4.08848e-06	PTPN18
ENSG00000072163.20_LIMS2	62.182	-0.270605	0.283818	-0.953445	0.340364	0.6134	LIMS2
ENSG00000072182.14_ASIC4	32.894	0.432319	0.402532	1.074	0.282823	0.558871	ASIC4
ENSG00000072195.15_SPEG	756.933	0.0558478	0.101469	0.550393	0.58205	0.803419	SPEG
ENSG00000072201.14_LNX1	1.58739	1.15937	1.7494	0.662723	0.507508	NA	LNX1
ENSG00000072210.19_ALDH3A2	1389.82	-0.0667194	0.0861524	-0.774435	0.438674	0.700966	ALDH3A2
ENSG00000072274.14_TFRC	4286.35	0.259833	0.119349	2.17709	0.0294741	0.140639	TFRC
ENSG00000072310.18_SREBF1	1644.84	-0.475651	0.0947054	-5.02243	5.10223e-07	3.31224e-05	SREBF1
ENSG00000072315.4_TRPC5	0.141643	0.845613	4.08047	0.207234	0.835827	NA	TRPC5
ENSG00000072364.13_AFF4	2869.9	0.0647478	0.0918323	0.705066	0.480769	0.73473	AFF4
ENSG00000072401.15_UBE2D1	328.443	-0.0999832	0.145466	-0.687328	0.491876	0.743641	UBE2D1
ENSG00000072415.10_PALS1	1097.97	-0.0581681	0.0898642	-0.647289	0.517445	0.762207	PALS1
ENSG00000072422.17_RHOBTB1	575.99	0.0669552	0.126158	0.530725	0.595609	0.811335	RHOBTB1
ENSG00000072501.19_SMC1A	18198.2	-0.244927	0.0762309	-3.21297	0.00131372	0.0159738	SMC1A
ENSG00000072506.14_HSD17B10	2204.6	-0.0772486	0.0979186	-0.788906	0.430167	0.693609	HSD17B10
ENSG00000072518.23_MARK2	1980.17	0.145119	0.0859355	1.6887	0.0912773	0.287402	MARK2
ENSG00000072571.20_HMMR	1805.12	0.573819	0.080834	7.09874	1.25903e-12	4.47587e-10	HMMR
ENSG00000072609.18_CHFR	534.588	-0.0332719	0.115679	-0.287622	0.773636	0.910401	CHFR
ENSG00000072657.10_TRHDE	42.4327	-0.412462	0.341597	-1.20745	0.227258	0.495242	TRHDE
ENSG00000072682.20_P4HA2	758.655	-0.15007	0.102765	-1.46032	0.144202	0.379598	P4HA2
ENSG00000072694.22_FCGR2B	1.57604	1.06883	1.77818	0.601081	0.547786	NA	FCGR2B
ENSG00000072736.19_NFATC3	1838.48	0.102418	0.0816526	1.25432	0.209726	0.472256	NFATC3
ENSG00000072756.18_TRNT1	363.174	0.161735	0.143989	1.12325	0.261333	0.535543	TRNT1
ENSG00000072778.20_ACADVL	2283.07	-0.275723	0.0812277	-3.39444	0.000687683	0.00993017	ACADVL
ENSG00000072786.13_STK10	1340.51	-0.138416	0.0906702	-1.52658	0.126865	0.349509	STK10
ENSG00000072803.18_FBXW11	1766.26	-0.0906842	0.0854048	-1.06182	0.288319	0.564261	FBXW11
ENSG00000072818.12_ACAP1	2.13509	-1.19681	1.56528	-0.764598	0.444511	NA	ACAP1
ENSG00000072832.15_CRMP1	21.8032	0.0498169	0.500141	0.0996059	0.920657	0.972571	CRMP1
ENSG00000072840.13_EVC	540.067	0.250212	0.110593	2.26246	0.0236687	0.120985	EVC
ENSG00000072849.11_DERL2	403.533	0.0334969	0.138796	0.241339	0.809292	0.926337	DERL2
ENSG00000072858.11_SIDT1	29.5178	0.689563	0.431545	1.59789	0.110067	0.320068	SIDT1
ENSG00000072864.16_NDE1	936.131	-0.0207084	0.0965015	-0.214591	0.830086	0.935038	NDE1
ENSG00000072952.21_IRAG1	9.8473	0.475203	0.729902	0.65105	0.515014	NA	IRAG1
ENSG00000072954.7_TMEM38A	214.029	0.0759577	0.166604	0.455918	0.648449	0.84236	TMEM38A
ENSG00000072958.9_AP1M1	1445.73	0.0641326	0.0867245	0.739498	0.459605	0.717745	AP1M1
ENSG00000073008.16_PVR	2086.8	0.0206925	0.0791327	0.261492	0.793713	0.920247	PVR
ENSG00000073050.12_XRCC1	1609.14	0.224106	0.100375	2.23269	0.0255696	0.128071	XRCC1
ENSG00000073060.17_SCARB1	2185.23	-0.185901	0.0745316	-2.49425	0.0126222	0.0787887	SCARB1
ENSG00000073067.14_CYP2W1	2.23191	-0.577309	1.51207	-0.3818	0.70261	NA	CYP2W1
ENSG00000073111.15_MCM2	12249.6	-0.0808658	0.0790232	-1.02332	0.306158	0.582113	MCM2
ENSG00000073146.17_MOV10L1	3.06928	0.385496	1.23213	0.31287	0.754379	NA	MOV10L1
ENSG00000073150.14_PANX2	623.935	-0.25144	0.104695	-2.40165	0.0163214	0.0941647	PANX2
ENSG00000073169.15_SELENOO	737.962	0.468262	0.109519	4.27563	1.906e-05	0.000632412	SELENOO
ENSG00000073282.14_TP63	1.99001	2.29522	1.72432	1.33109	0.18316	NA	TP63
ENSG00000073331.18_ALPK1	322.953	-0.234243	0.14306	-1.63737	0.101552	0.305825	ALPK1
ENSG00000073350.14_LLGL2	440.558	0.00713829	0.128389	0.0555989	0.955661	0.984636	LLGL2
ENSG00000073417.15_PDE8A	916.609	0.149684	0.10268	1.45777	0.144903	0.380738	PDE8A
ENSG00000073464.13_CLCN4	11.9301	-0.586194	0.649797	-0.902118	0.366994	NA	CLCN4
ENSG00000073536.18_NLE1	1633.58	0.067498	0.109466	0.616614	0.537489	0.775968	NLE1
ENSG00000073578.18_SDHA	5155.53	-0.106961	0.0848061	-1.26124	0.207223	0.468653	SDHA
ENSG00000073584.20_SMARCE1	4489.34	0.0220179	0.0662455	0.332368	0.739611	0.892585	SMARCE1
ENSG00000073598.6_FNDC8	0.836105	-2.01554	2.62277	-0.768476	0.442205	NA	FNDC8
ENSG00000073605.19_GSDMB	232.978	-0.0307266	0.183905	-0.167078	0.867308	0.951385	GSDMB
ENSG00000073614.13_KDM5A	1778.08	0.153983	0.0973225	1.5822	0.113604	0.327015	KDM5A
ENSG00000073670.14_ADAM11	847.89	-0.0873231	0.0972773	-0.897672	0.36936	0.640909	ADAM11
ENSG00000073711.11_PPP2R3A	344.086	-0.0872316	0.134577	-0.64819	0.516862	0.76175	PPP2R3A
ENSG00000073712.15_FERMT2	1667.33	-0.311827	0.0946846	-3.29332	0.000990114	0.0129338	FERMT2
ENSG00000073734.10_ABCB11	0.159144	0.845613	4.08047	0.207234	0.835827	NA	ABCB11
ENSG00000073737.17_DHRS9	0.318288	1.73836	4.0385	0.430446	0.666871	NA	DHRS9
ENSG00000073754.6_CD5L	0.14321	-1.07794	4.08047	-0.26417	0.791649	NA	CD5L
ENSG00000073756.13_PTGS2	5.28744	-0.817045	0.938837	-0.870273	0.384151	NA	PTGS2
ENSG00000073792.16_IGF2BP2	4736.06	0.0546851	0.0688073	0.794758	0.426755	0.690269	IGF2BP2
ENSG00000073803.14_MAP3K13	678.079	0.0859293	0.12177	0.705669	0.480394	0.734538	MAP3K13
ENSG00000073849.16_ST6GAL1	753.122	-0.254803	0.115645	-2.20331	0.0275728	0.134437	ST6GAL1
ENSG00000073861.3_TBX21	26.4195	0.999891	0.44637	2.24005	0.0250875	0.126207	TBX21
ENSG00000073905.8_VDAC1P1	0.878181	-0.874986	2.40779	-0.363399	0.716307	NA	VDAC1P1
ENSG00000073910.23_FRY	192.838	0.14593	0.177521	0.822041	0.411053	0.676467	FRY
ENSG00000073921.18_PICALM	2211.2	0.180087	0.0817492	2.20292	0.0276007	0.134456	PICALM
ENSG00000073969.19_NSF	1921.5	-0.0629188	0.0780418	-0.806219	0.420116	0.684724	NSF
ENSG00000074047.22_GLI2	690.778	-0.0375135	0.103453	-0.362614	0.716893	0.880258	GLI2
ENSG00000074054.21_CLASP1	1981.04	0.0625921	0.0775737	0.806872	0.41974	0.684474	CLASP1
ENSG00000074071.15_MRPS34	4261.39	-0.0319162	0.0932445	-0.342286	0.732136	0.888308	MRPS34
ENSG00000074181.9_NOTCH3	2280.15	-0.371664	0.118163	-3.14535	0.00165887	0.0191264	NOTCH3
ENSG00000074201.9_CLNS1A	3440.45	-0.0989056	0.0842544	-1.17389	0.240438	0.511394	CLNS1A
ENSG00000074211.14_PPP2R2C	225.774	-0.0896788	0.158444	-0.565996	0.571397	0.795925	PPP2R2C
ENSG00000074219.14_TEAD2	543.716	-0.334061	0.112258	-2.97583	0.00292201	0.0286841	TEAD2
ENSG00000074266.23_EED	481.999	0.37961	0.1264	3.00325	0.00267113	0.0269995	EED
ENSG00000074276.11_CDHR2	6.40574	0.0799087	0.882203	0.0905786	0.927827	NA	CDHR2
ENSG00000074317.11_SNCB	254.268	-0.394717	0.156677	-2.5193	0.0117587	0.0751904	SNCB
ENSG00000074319.13_TSG101	818.237	-0.198833	0.103072	-1.92906	0.0537233	0.20721	TSG101
ENSG00000074356.17_NCBP3	1918.71	0.0206224	0.0799843	0.257831	0.796538	0.921494	NCBP3
ENSG00000074370.18_ATP2A3	487.559	-0.0530295	0.119231	-0.444765	0.65649	0.846829	ATP2A3
ENSG00000074410.14_CA12	383.195	0.0912876	0.126861	0.719589	0.471778	0.728096	CA12
ENSG00000074416.16_MGLL	258.235	0.133193	0.178293	0.747041	0.455039	0.71405	MGLL
ENSG00000074527.13_NTN4	114.871	0.0579304	0.226069	0.256251	0.797757	0.921767	NTN4
ENSG00000074582.15_BCS1L	888.991	0.0349952	0.110253	0.317408	0.750934	0.896952	BCS1L
ENSG00000074590.14_NUAK1	503.555	0.104881	0.119126	0.880425	0.378629	0.648539	NUAK1
ENSG00000074603.19_DPP8	911.427	0.323667	0.107721	3.00468	0.00265859	0.0269121	DPP8
ENSG00000074621.14_SLC24A1	500.542	-0.256749	0.125043	-2.05328	0.0400452	0.173008	SLC24A1
ENSG00000074657.14_ZNF532	656.398	-0.208687	0.10597	-1.96931	0.0489178	0.195582	ZNF532
ENSG00000074660.17_SCARF1	21.5906	-0.430817	0.513498	-0.838986	0.401477	0.669106	SCARF1
ENSG00000074695.6_LMAN1	4224.05	-0.252793	0.0974129	-2.59507	0.00945723	0.0647139	LMAN1
ENSG00000074696.13_HACD3	5193.09	0.0471784	0.0778902	0.605703	0.544712	0.780003	HACD3
ENSG00000074706.14_IPCEF1	41.4372	0.406582	0.348015	1.16829	0.242691	0.513842	IPCEF1
ENSG00000074755.15_ZZEF1	1856.71	0.248989	0.0783327	3.17861	0.00147982	0.0174942	ZZEF1
ENSG00000074771.4_NOX3	0	NA	NA	NA	NA	NA	NOX3
ENSG00000074800.16_ENO1	38680.1	0.0296751	0.0748211	0.396614	0.691652	0.866707	ENO1
ENSG00000074803.21_SLC12A1	2.11729	0.961271	1.58698	0.605723	0.544699	NA	SLC12A1
ENSG00000074842.8_MYDGF	2066.42	-0.137583	0.117898	-1.16696	0.243225	0.514466	MYDGF
ENSG00000074855.11_ANO8	340.776	0.0655406	0.137704	0.475952	0.634109	0.833293	ANO8
ENSG00000074935.14_TUBE1	804.697	-0.0774608	0.111339	-0.695723	0.486602	0.739713	TUBE1
ENSG00000074964.17_ARHGEF10L	333.218	0.196502	0.140458	1.39901	0.16181	0.404379	ARHGEF10L
ENSG00000074966.11_TXK	2.77193	-0.0103313	1.34706	-0.00766949	0.993881	NA	TXK
ENSG00000075035.10_WSCD2	0.284853	-0.11616	4.08047	-0.0284672	0.97729	NA	WSCD2
ENSG00000075043.21_KCNQ2	1271.18	0.0490994	0.0891404	0.55081	0.581764	0.803237	KCNQ2
ENSG00000075073.16_TACR2	0.302354	-0.11616	4.08047	-0.0284672	0.97729	NA	TACR2
ENSG00000075089.10_ACTR6	563.324	-0.112674	0.122487	-0.919885	0.357633	0.628885	ACTR6
ENSG00000075131.10_TIPIN	721.769	0.289872	0.106878	2.71218	0.00668426	0.0513389	TIPIN
ENSG00000075142.14_SRI	894.843	-0.118316	0.0937177	-1.26248	0.206777	0.468212	SRI
ENSG00000075151.24_EIF4G3	3900.2	0.321881	0.0728919	4.41586	1.00608e-05	0.000361099	EIF4G3
ENSG00000075188.9_NUP37	551.738	-0.0292075	0.115977	-0.251839	0.801165	0.922585	NUP37
ENSG00000075213.11_SEMA3A	171.401	0.14099	0.206185	0.683801	0.494101	0.745558	SEMA3A
ENSG00000075218.19_GTSE1	1466.79	0.185422	0.0855636	2.16707	0.0302294	0.142969	GTSE1
ENSG00000075223.14_SEMA3C	57.4435	0.435734	0.311977	1.39669	0.162507	0.405481	SEMA3C
ENSG00000075234.17_TTC38	752.757	0.267686	0.103627	2.58316	0.00978991	0.0663518	TTC38
ENSG00000075239.14_ACAT1	2536.24	-0.284788	0.0737522	-3.86142	0.000112731	0.00258158	ACAT1
ENSG00000075240.17_GRAMD4	878.523	-0.0839877	0.11062	-0.759245	0.447706	0.7079	GRAMD4
ENSG00000075275.18_CELSR1	1536.58	-0.450586	0.0881561	-5.11124	3.20058e-07	2.20221e-05	CELSR1
ENSG00000075290.8_WNT8B	26.43	0.111237	0.452126	0.246031	0.805658	0.924334	WNT8B
ENSG00000075292.19_ZNF638	3385.71	0.264709	0.0749569	3.53148	0.000413234	0.00684035	ZNF638
ENSG00000075303.13_SLC25A40	274.415	-0.0925902	0.146336	-0.632726	0.526913	0.769346	SLC25A40
ENSG00000075336.12_TIMM21	619.455	0.02876	0.118569	0.24256	0.808346	0.925782	TIMM21
ENSG00000075340.23_ADD2	1968.23	-0.224458	0.0850419	-2.63938	0.00830572	0.0591664	ADD2
ENSG00000075388.4_FGF4	0	NA	NA	NA	NA	NA	FGF4
ENSG00000075391.18_RASAL2	775.744	-0.054179	0.117178	-0.462366	0.643819	0.840285	RASAL2
ENSG00000075399.14_VPS9D1	94.1654	-0.201424	0.242045	-0.832176	0.40531	0.671811	VPS9D1
ENSG00000075407.19_ZNF37A	874.365	0.0455852	0.115252	0.395527	0.692454	0.866908	ZNF37A
ENSG00000075413.19_MARK3	3188.4	0.253624	0.0739933	3.42766	0.000608806	0.00914495	MARK3
ENSG00000075415.15_SLC25A3	6047.79	-0.271552	0.0898111	-3.02359	0.00249793	0.0256863	SLC25A3
ENSG00000075420.13_FNDC3B	1101.59	0.0611668	0.0995925	0.614171	0.539102	0.776582	FNDC3B
ENSG00000075426.12_FOSL2	231.738	0.424675	0.16067	2.64316	0.00821374	0.0586791	FOSL2
ENSG00000075429.9_CACNG5	33.6581	-0.0496047	0.408111	-0.121547	0.903258	0.965706	CACNG5
ENSG00000075461.6_CACNG4	30.3025	0.328782	0.439909	0.747386	0.45483	0.713948	CACNG4
ENSG00000075539.15_FRYL	730.259	0.321644	0.12839	2.5052	0.0122381	0.0772159	FRYL
ENSG00000075568.17_TMEM131	2004.69	0.193079	0.0857048	2.25284	0.0242692	0.123211	TMEM131
ENSG00000075618.18_FSCN1	4750.99	-0.0447415	0.0749327	-0.597088	0.550448	0.782893	FSCN1
ENSG00000075624.17_ACTB	30977.3	-0.133921	0.0821944	-1.62932	0.103246	0.308745	ACTB
ENSG00000075643.6_MOCOS	497.322	-0.546913	0.117518	-4.65388	3.25746e-06	0.000148737	MOCOS
ENSG00000075651.17_PLD1	276.331	-0.0389305	0.170531	-0.22829	0.819421	0.931103	PLD1
ENSG00000075673.12_ATP12A	51.114	-0.0991741	0.324477	-0.305643	0.759877	0.902074	ATP12A
ENSG00000075702.19_WDR62	2304.72	0.281221	0.0818562	3.43554	0.000591364	0.00900508	WDR62
ENSG00000075711.21_DLG1	2054.01	-0.0436669	0.0836153	-0.522235	0.601507	0.814547	DLG1
ENSG00000075785.14_RAB7A	5548.41	-0.01134	0.0744999	-0.152215	0.879017	0.956297	RAB7A
ENSG00000075790.12_BCAP29	196.011	0.182499	0.196112	0.930583	0.352069	0.623951	BCAP29
ENSG00000075826.17_SEC31B	386.582	-0.00473028	0.195022	-0.0242551	0.980649	0.993356	SEC31B
ENSG00000075856.12_SART3	2572.36	0.0872087	0.074522	1.17024	0.241904	0.513106	SART3
ENSG00000075884.14_ARHGAP15	0.481674	-0.987845	3.19797	-0.308898	0.757399	NA	ARHGAP15
ENSG00000075886.11_TUBA3D	0	NA	NA	NA	NA	NA	TUBA3D
ENSG00000075891.24_PAX2	224.756	-0.270297	0.178122	-1.51749	0.129143	0.354007	PAX2
ENSG00000075914.13_EXOSC7	650.402	0.129662	0.124896	1.03816	0.299194	0.576094	EXOSC7
ENSG00000075945.13_KIFAP3	708.489	0.043574	0.10418	0.418257	0.675759	0.857559	KIFAP3
ENSG00000075975.17_MKRN2	1349.02	0.163106	0.0998782	1.63305	0.102459	0.307378	MKRN2
ENSG00000076003.5_MCM6	5383.62	0.0606989	0.0799241	0.759456	0.44758	0.70785	MCM6
ENSG00000076043.11_REXO2	825.478	-0.00502395	0.103681	-0.0484556	0.961353	0.986794	REXO2
ENSG00000076053.12_RBM7	544.429	0.0678654	0.112516	0.60316	0.546402	0.781072	RBM7
ENSG00000076067.14_RBMS2	677.378	-0.171986	0.119517	-1.43901	0.150149	0.387651	RBMS2
ENSG00000076108.12_BAZ2A	6094.18	-0.0389343	0.0834274	-0.466685	0.640725	0.838113	BAZ2A
ENSG00000076201.16_PTPN23	2064.62	0.275895	0.080385	3.43217	0.000598775	0.00904889	PTPN23
ENSG00000076242.18_MLH1	0	NA	NA	NA	NA	NA	MLH1
ENSG00000076248.12_UNG	1803.99	-0.121032	0.0901203	-1.34301	0.179269	0.429486	UNG
ENSG00000076258.10_FMO4	24.2572	-0.469101	0.469719	-0.998684	0.317948	0.594593	FMO4
ENSG00000076321.11_KLHL20	288.096	-0.013879	0.146755	-0.0945728	0.924654	0.974107	KLHL20
ENSG00000076344.16_RGS11	14.524	0.210664	0.565333	0.372637	0.709419	NA	RGS11
ENSG00000076351.13_SLC46A1	825.759	-0.0225564	0.10492	-0.214987	0.829778	0.934946	SLC46A1
ENSG00000076356.7_PLXNA2	467.124	-0.118981	0.121999	-0.975263	0.32943	0.605317	PLXNA2
ENSG00000076382.17_SPAG5	2657.31	0.152634	0.073707	2.07082	0.0383759	0.168082	SPAG5
ENSG00000076513.17_ANKRD13A	1093.31	-0.119476	0.104041	-1.14836	0.25082	0.523859	ANKRD13A
ENSG00000076554.16_TPD52	1572.8	-0.244146	0.0982776	-2.48425	0.0129824	0.0804648	TPD52
ENSG00000076555.16_ACACB	916.564	0.00438406	0.107245	0.0408788	0.967393	0.989324	ACACB
ENSG00000076604.16_TRAF4	1271.85	0.174985	0.0924537	1.89267	0.0584014	0.217546	TRAF4
ENSG00000076641.4_PAG1	874.031	-0.383973	0.118284	-3.24618	0.00116963	0.0146431	PAG1
ENSG00000076650.7_GPATCH1	408.521	0.358972	0.13719	2.61661	0.00888082	0.0619664	GPATCH1
ENSG00000076662.11_ICAM3	92.9475	-0.095524	0.237779	-0.401734	0.687879	0.864248	ICAM3
ENSG00000076685.19_NT5C2	1334.85	0.183803	0.0867815	2.118	0.0341751	0.155381	NT5C2
ENSG00000076706.17_MCAM	1339.34	0.028626	0.0839437	0.341015	0.733093	0.888825	MCAM
ENSG00000076716.9_GPC4	1930.21	-0.424361	0.114538	-3.70497	0.000211413	0.00406779	GPC4
ENSG00000076770.16_MBNL3	684.38	-0.449121	0.112072	-4.00742	6.13845e-05	0.0015912	MBNL3
ENSG00000076826.10_CAMSAP3	1068.81	0.34152	0.0970282	3.5198	0.000431871	0.00704728	CAMSAP3
ENSG00000076864.21_RAP1GAP	578.079	0.0395507	0.12441	0.317906	0.750556	0.896952	RAP1GAP
ENSG00000076924.12_XAB2	2132.91	-0.222083	0.0844806	-2.6288	0.00856865	0.0605483	XAB2
ENSG00000076928.20_ARHGEF1	1348.57	-0.183746	0.108641	-1.69131	0.0907783	0.286374	ARHGEF1
ENSG00000076944.18_STXBP2	1133.47	-0.0918141	0.0912427	-1.00626	0.314289	0.590471	STXBP2
ENSG00000076984.18_MAP2K7	1808.43	-0.184441	0.109896	-1.67833	0.0932822	0.29138	MAP2K7
ENSG00000077009.14_NMRK2	8.05561	0.0486204	0.797502	0.0609658	0.951386	NA	NMRK2
ENSG00000077044.11_DGKD	1156.12	0.0881527	0.0916117	0.962243	0.335928	0.609685	DGKD
ENSG00000077063.11_CTTNBP2	195.841	0.169518	0.178956	0.947261	0.343506	0.616125	CTTNBP2
ENSG00000077080.10_ACTL6B	3.3685	1.71699	1.3085	1.31218	0.18946	NA	ACTL6B
ENSG00000077092.20_RARB	239.918	0.240495	0.161397	1.49009	0.136201	0.365562	RARB
ENSG00000077097.17_TOP2B	6501.28	-0.194341	0.0661234	-2.93906	0.00329212	0.0311895	TOP2B
ENSG00000077147.16_TM9SF3	3227.87	-0.262493	0.0916953	-2.86267	0.0042009	0.0372427	TM9SF3
ENSG00000077150.21_NFKB2	1002.03	0.0173033	0.107018	0.161685	0.871554	0.953136	NFKB2
ENSG00000077152.12_UBE2T	1093.07	0.0592265	0.106752	0.554807	0.579027	0.801626	UBE2T
ENSG00000077157.23_PPP1R12B	687.431	0.525792	0.111547	4.71362	2.43359e-06	0.000118745	PPP1R12B
ENSG00000077232.19_DNAJC10	2094.91	-0.214446	0.0840151	-2.55247	0.0106962	0.0701691	DNAJC10
ENSG00000077235.18_GTF3C1	6349.77	0.0113636	0.0750819	0.15135	0.8797	0.95639	GTF3C1
ENSG00000077238.14_IL4R	326.251	0.151223	0.145001	1.04292	0.296987	0.573502	IL4R
ENSG00000077254.14_USP33	2223.5	-0.0860997	0.0771604	-1.11585	0.264485	0.539204	USP33
ENSG00000077264.17_PAK3	13.5699	0.0671802	0.604939	0.111053	0.911574	NA	PAK3
ENSG00000077274.9_CAPN6	5.92262	-0.234341	0.969126	-0.241806	0.80893	NA	CAPN6
ENSG00000077279.21_DCX	0.702682	-0.208683	2.61865	-0.0796911	0.936483	NA	DCX
ENSG00000077312.9_SNRPA	3840.2	-0.225515	0.102013	-2.21065	0.02706	0.132899	SNRPA
ENSG00000077327.16_SPAG6	2.50425	-1.06483	1.48792	-0.715646	0.47421	NA	SPAG6
ENSG00000077348.10_EXOSC5	585.848	-0.14101	0.115907	-1.21658	0.223763	0.490027	EXOSC5
ENSG00000077380.16_DYNC1I2	1291.79	0.0442793	0.0919243	0.481693	0.630024	0.830799	DYNC1I2
ENSG00000077420.16_APBB1IP	1.66633	2.98602	1.94126	1.53819	0.124003	NA	APBB1IP
ENSG00000077454.17_LRCH4	962.198	0.31945	0.098154	3.25459	0.00113558	0.0143325	LRCH4
ENSG00000077458.13_FAM76B	480.067	0.233162	0.122206	1.90794	0.0563993	0.213266	FAM76B
ENSG00000077463.15_SIRT6	533.36	0.209383	0.11811	1.77278	0.0762658	0.257281	SIRT6
ENSG00000077498.9_TYR	0	NA	NA	NA	NA	NA	TYR
ENSG00000077514.9_POLD3	1334.37	-0.0240935	0.0839631	-0.286953	0.774148	0.910602	POLD3
ENSG00000077522.15_ACTN2	579.233	1.09367	0.148439	7.36779	1.73483e-13	7.1952e-11	ACTN2
ENSG00000077549.19_CAPZB	3066.95	-0.124312	0.0936535	-1.32736	0.18439	0.437142	CAPZB
ENSG00000077585.14_GPR137B	125.26	-0.28201	0.206847	-1.36338	0.172764	0.419751	GPR137B
ENSG00000077616.11_NAALAD2	102.298	0.0579021	0.237317	0.243987	0.807241	0.925031	NAALAD2
ENSG00000077684.16_JADE1	1573.3	0.0812327	0.0817979	0.99309	0.320666	0.5969	JADE1
ENSG00000077713.19_SLC25A43	205.567	-0.395999	0.163541	-2.42141	0.0154603	0.0905248	SLC25A43
ENSG00000077721.17_UBE2A	1104.05	-0.0408737	0.0978947	-0.417527	0.676293	0.857673	UBE2A
ENSG00000077782.23_FGFR1	2451.71	-0.247362	0.0730145	-3.38785	0.000704427	0.010123	FGFR1
ENSG00000077800.13_FKBP6	0.465319	0.787336	3.235	0.243381	0.80771	NA	FKBP6
ENSG00000077935.17_SMC1B	41.4217	-0.0248255	0.339553	-0.0731124	0.941717	0.979535	SMC1B
ENSG00000077942.19_FBLN1	3309.74	-0.226745	0.099374	-2.28174	0.022505	0.116796	FBLN1
ENSG00000077943.8_ITGA8	98.3393	-0.0787238	0.235439	-0.33437	0.7381	0.891416	ITGA8
ENSG00000077984.6_CST7	0	NA	NA	NA	NA	NA	CST7
ENSG00000078018.22_MAP2	23.3596	-0.424888	0.463965	-0.915776	0.359785	0.631177	MAP2
ENSG00000078043.16_PIAS2	489.719	0.160378	0.131379	1.22072	0.222192	0.488517	PIAS2
ENSG00000078053.17_AMPH	115.513	0.0549293	0.23682	0.231946	0.81658	0.929628	AMPH
ENSG00000078061.14_ARAF	1599.84	-0.0681782	0.0979009	-0.6964	0.486178	0.739369	ARAF
ENSG00000078070.14_MCCC1	1021.34	-0.0426907	0.114802	-0.371865	0.709993	0.876833	MCCC1
ENSG00000078081.8_LAMP3	182.642	-0.630369	0.231453	-2.72353	0.00645874	0.0504186	LAMP3
ENSG00000078098.15_FAP	0	NA	NA	NA	NA	NA	FAP
ENSG00000078114.19_NEBL	259.233	-0.0930671	0.152094	-0.611906	0.5406	0.777259	NEBL
ENSG00000078124.13_ACER3	477.007	0.247491	0.115797	2.13728	0.0325753	0.150072	ACER3
ENSG00000078140.14_UBE2K	2047.82	-0.0609634	0.0918256	-0.663904	0.506751	0.755045	UBE2K
ENSG00000078142.14_PIK3C3	473.716	0.197036	0.124845	1.57825	0.114507	0.328486	PIK3C3
ENSG00000078177.15_N4BP2	462.873	-0.265775	0.132136	-2.01138	0.0442849	0.183672	N4BP2
ENSG00000078237.7_TIGAR	446.421	0.456366	0.134277	3.39869	0.0006771	0.00982486	TIGAR
ENSG00000078246.17_TULP3	1144.2	0.0570253	0.0928031	0.614477	0.5389	0.776582	TULP3
ENSG00000078269.15_SYNJ2	1088.86	0.0225928	0.0905806	0.249422	0.803035	0.9234	SYNJ2
ENSG00000078295.17_ADCY2	0.196822	-1.07794	4.08047	-0.26417	0.791649	NA	ADCY2
ENSG00000078304.20_PPP2R5C	3334.25	-0.203168	0.0710848	-2.8581	0.00426182	0.0374975	PPP2R5C
ENSG00000078319.13_PMS2P1	2.53638	1.85091	3.83474	0.482669	0.629331	NA	PMS2P1
ENSG00000078328.23_RBFOX1	0.326961	-1.90202	3.98767	-0.476976	0.633379	NA	RBFOX1
ENSG00000078369.19_GNB1	8717.71	-0.191138	0.0754048	-2.53483	0.0112503	0.0727177	GNB1
ENSG00000078399.19_HOXA9	1293.01	0.367202	0.101621	3.61344	0.000302162	0.00536966	HOXA9
ENSG00000078401.7_EDN1	3.58071	-0.243922	1.26639	-0.192613	0.847262	NA	EDN1
ENSG00000078403.17_MLLT10	1036.27	0.0373748	0.0898882	0.415792	0.677563	0.858583	MLLT10
ENSG00000078487.18_ZCWPW1	115.229	0.0110666	0.218725	0.0505957	0.959648	0.986268	ZCWPW1
ENSG00000078549.16_ADCYAP1R1	559.468	-0.260481	0.124141	-2.09826	0.0358822	0.160551	ADCYAP1R1
ENSG00000078579.9_FGF20	0.860109	0.58165	2.42063	0.240288	0.810107	NA	FGF20
ENSG00000078589.13_P2RY10	0	NA	NA	NA	NA	NA	P2RY10
ENSG00000078596.11_ITM2A	1.89616	-0.491575	1.57549	-0.312014	0.75503	NA	ITM2A
ENSG00000078618.23_NRDC	3553.5	0.0313957	0.0737391	0.425768	0.670277	0.854277	NRDC
ENSG00000078668.14_VDAC3	1830.77	0.0770517	0.122468	0.629156	0.529247	0.770545	VDAC3
ENSG00000078674.20_PCM1	3243.34	-0.180586	0.0824814	-2.18941	0.0285672	0.137726	PCM1
ENSG00000078687.18_TNRC6C	1095.77	0.277425	0.103133	2.68998	0.00714565	0.0538642	TNRC6C
ENSG00000078699.22_CBFA2T2	591.593	-0.00672445	0.11763	-0.0571662	0.954413	0.98439	CBFA2T2
ENSG00000078725.13_BRINP1	0	NA	NA	NA	NA	NA	BRINP1
ENSG00000078747.17_ITCH	1432.94	0.131118	0.108806	1.20506	0.22818	0.496257	ITCH
ENSG00000078795.17_PKD2L2	0.539717	-1.12027	3.07807	-0.363952	0.715894	NA	PKD2L2
ENSG00000078804.13_TP53INP2	409.409	0.150802	0.125559	1.20104	0.229734	0.498352	TP53INP2
ENSG00000078808.20_SDF4	2795.93	-0.147571	0.0774658	-1.90498	0.0567831	0.213768	SDF4
ENSG00000078814.19_MYH7B	22.2752	0.887247	0.493723	1.79705	0.0723269	0.248943	MYH7B
ENSG00000078898.7_BPIFB2	0	NA	NA	NA	NA	NA	BPIFB2
ENSG00000078900.16_TP73	718.169	0.114366	0.10286	1.11186	0.266196	0.540832	TP73
ENSG00000078902.16_TOLLIP	748.149	0.0235703	0.125694	0.187521	0.851252	0.944923	TOLLIP
ENSG00000078967.13_UBE2D4	291.968	-0.217985	0.148867	-1.4643	0.143113	0.377975	UBE2D4
ENSG00000079101.18_CLUL1	21.8783	0.07247	0.466373	0.155391	0.876513	0.95562	CLUL1
ENSG00000079102.18_RUNX1T1	495.559	-0.164014	0.130453	-1.25727	0.208657	0.470896	RUNX1T1
ENSG00000079112.10_CDH17	0.180466	0.845613	4.08047	0.207234	0.835827	NA	CDH17
ENSG00000079134.13_THOC1	634.039	0.273646	0.145773	1.8772	0.0604909	0.22279	THOC1
ENSG00000079150.19_FKBP7	324.494	0.369851	0.136335	2.71282	0.00667134	0.0512923	FKBP7
ENSG00000079156.17_OSBPL6	936.777	-0.116458	0.106085	-1.09779	0.272297	0.547786	OSBPL6
ENSG00000079215.15_SLC1A3	821.917	0.374396	0.140133	2.67172	0.00754647	0.0556426	SLC1A3
ENSG00000079246.16_XRCC5	9973.25	0.0185979	0.0742674	0.250418	0.802264	0.923322	XRCC5
ENSG00000079257.8_LXN	11.2304	0.0346919	0.694484	0.0499536	0.960159	NA	LXN
ENSG00000079263.19_SP140	0.827969	1.78807	2.60881	0.685397	0.493094	NA	SP140
ENSG00000079277.22_MKNK1	662.217	-0.0207368	0.105727	-0.196135	0.844505	0.94158	MKNK1
ENSG00000079308.21_TNS1	420.446	0.130641	0.143225	0.912137	0.361697	0.632747	TNS1
ENSG00000079313.15_REXO1	1440.91	0.0172016	0.0926065	0.18575	0.852641	0.94523	REXO1
ENSG00000079332.16_SAR1A	2045.09	0.0179506	0.0888684	0.201991	0.839924	0.939957	SAR1A
ENSG00000079335.20_CDC14A	332.937	0.456038	0.142916	3.19095	0.00141804	0.016979	CDC14A
ENSG00000079337.16_RAPGEF3	75.5067	-0.840264	0.295379	-2.8447	0.00444536	0.0385221	RAPGEF3
ENSG00000079385.23_CEACAM1	0.342895	-0.116159	3.95441	-0.0293745	0.976566	NA	CEACAM1
ENSG00000079387.15_SENP1	1235.69	0.0215512	0.0851857	0.252991	0.800275	0.922323	SENP1
ENSG00000079393.22_DUSP13B	0.377288	-0.116158	3.81437	-0.0304529	0.975706	NA	DUSP13B
ENSG00000079432.9_CIC	2458.03	0.164271	0.0872075	1.88368	0.0596082	0.220849	CIC
ENSG00000079435.10_LIPE	112.255	0.149883	0.226545	0.661603	0.508226	0.756185	LIPE
ENSG00000079459.14_FDFT1	3306.58	0.116409	0.0934093	1.24623	0.21268	0.476591	FDFT1
ENSG00000079462.8_PAFAH1B3	757.355	-0.311417	0.112193	-2.77572	0.00550798	0.0448906	PAFAH1B3
ENSG00000079482.14_OPHN1	411.133	-0.428733	0.139061	-3.08306	0.00204886	0.0221838	OPHN1
ENSG00000079557.5_AFM	0	NA	NA	NA	NA	NA	AFM
ENSG00000079616.14_KIF22	3763.24	0.104031	0.079624	1.30653	0.191374	0.447798	KIF22
ENSG00000079689.15_SCGN	0	NA	NA	NA	NA	NA	SCGN
ENSG00000079691.19_CARMIL1	717.529	0.0676303	0.10099	0.669673	0.503066	0.752352	CARMIL1
ENSG00000079739.17_PGM1	1856.43	-0.0705446	0.0800657	-0.881084	0.378272	0.648076	PGM1
ENSG00000079785.16_DDX1	4247.87	-0.106436	0.0731995	-1.45406	0.145931	0.382199	DDX1
ENSG00000079805.19_DNM2	5127.41	-0.0637596	0.0755591	-0.843837	0.398761	0.666853	DNM2
ENSG00000079819.20_EPB41L2	5780.54	-0.113936	0.0690077	-1.65107	0.098725	0.300768	EPB41L2
ENSG00000079841.20_RIMS1	18.5245	0.121275	0.509021	0.238251	0.811686	NA	RIMS1
ENSG00000079931.15_MOXD1	447.667	-0.358313	0.129533	-2.7662	0.00567141	0.0457775	MOXD1
ENSG00000079950.14_STX7	528.199	0.05348	0.117299	0.45593	0.64844	0.84236	STX7
ENSG00000079974.19_RABL2B	518.664	0.0846872	0.139238	0.60822	0.543042	0.778806	RABL2B
ENSG00000079999.14_KEAP1	1422.08	-0.0160219	0.0879699	-0.182129	0.855481	0.946283	KEAP1
ENSG00000080007.8_DDX43	0.57411	-1.16363	3.26542	-0.356348	0.72158	NA	DDX43
ENSG00000080031.10_PTPRH	64.926	0.307477	0.351038	0.875908	0.38108	0.650671	PTPRH
ENSG00000080166.16_DCT	28.1451	-0.184179	0.440766	-0.417862	0.676048	0.857559	DCT
ENSG00000080189.15_SLC35C2	665.853	-0.116651	0.106234	-1.09805	0.272181	0.547701	SLC35C2
ENSG00000080200.10_CRYBG3	1163.22	-0.0452289	0.113697	-0.397801	0.690777	0.866408	CRYBG3
ENSG00000080224.18_EPHA6	159.223	-0.317454	0.217025	-1.46276	0.143534	0.378672	EPHA6
ENSG00000080293.10_SCTR	1.14511	1.07663	2.0566	0.523499	0.600627	NA	SCTR
ENSG00000080298.16_RFX3	278.714	0.449175	0.175037	2.56616	0.010283	0.0683899	RFX3
ENSG00000080345.18_RIF1	2996.54	0.0585726	0.107843	0.543128	0.587042	0.806062	RIF1
ENSG00000080371.6_RAB21	1142.55	-0.0125294	0.0958618	-0.130703	0.896011	0.962637	RAB21
ENSG00000080493.19_SLC4A4	120.3	0.0315554	0.225985	0.139634	0.888949	0.959856	SLC4A4
ENSG00000080503.25_SMARCA2	1912.17	-0.193235	0.0852204	-2.26747	0.0233615	0.119914	SMARCA2
ENSG00000080511.5_RDH8	0	NA	NA	NA	NA	NA	RDH8
ENSG00000080546.14_SESN1	639.049	0.305018	0.111515	2.73521	0.00623408	0.0491193	SESN1
ENSG00000080561.14_MID2	1926.06	-0.296243	0.102376	-2.89368	0.00380754	0.0348135	MID2
ENSG00000080572.14_DNAAF6	3.02977	-0.199915	1.24075	-0.161124	0.871995	NA	DNAAF6
ENSG00000080573.7_COL5A3	6.9344	1.47907	0.873619	1.69303	0.0904491	NA	COL5A3
ENSG00000080603.17_SRCAP	6275.22	0.0899367	0.0783474	1.14792	0.251	0.524079	SRCAP
ENSG00000080608.10_PUM3	1349.99	0.110356	0.101362	1.08873	0.276272	0.551178	PUM3
ENSG00000080618.17_CPB2	0	NA	NA	NA	NA	NA	CPB2
ENSG00000080644.16_CHRNA3	59.9789	0.0864208	0.302956	0.285258	0.775446	0.911525	CHRNA3
ENSG00000080709.17_KCNN2	0.95754	2.04387	2.47846	0.824654	0.409568	NA	KCNN2
ENSG00000080802.21_CNOT4	1618.96	0.625931	0.0893015	7.00919	2.39707e-12	8.3234e-10	CNOT4
ENSG00000080815.20_PSEN1	1393.69	-0.0935839	0.0884943	-1.05751	0.290278	0.56641	PSEN1
ENSG00000080819.9_CPOX	1415.7	-0.224812	0.0847615	-2.65229	0.00799477	0.0577224	CPOX
ENSG00000080822.17_CLDND1	1175.3	-0.133396	0.0899005	-1.48382	0.137858	0.369079	CLDND1
ENSG00000080823.23_MOK	629.731	0.876747	0.113654	7.71421	1.21732e-14	6.26754e-12	MOK
ENSG00000080824.19_HSP90AA1	40077.7	-0.132008	0.124649	-1.05904	0.289582	0.56564	HSP90AA1
ENSG00000080839.12_RBL1	1137.44	0.223463	0.101116	2.20996	0.027108	0.132968	RBL1
ENSG00000080845.19_DLGAP4	1219.77	0.0540377	0.110698	0.488156	0.625439	0.828022	DLGAP4
ENSG00000080854.16_IGSF9B	748.51	-0.0920945	0.125835	-0.731864	0.464252	0.721401	IGSF9B
ENSG00000080910.14_CFHR2	0	NA	NA	NA	NA	NA	CFHR2
ENSG00000080947.16_CROCCP3	3.75383	1.12729	1.42449	0.791363	0.428732	NA	CROCCP3
ENSG00000080986.13_NDC80	583.418	0.262194	0.108209	2.42303	0.0153916	0.0902731	NDC80
ENSG00000081014.11_AP4E1	388.463	0.333018	0.129999	2.5617	0.0104161	0.0689089	AP4E1
ENSG00000081019.14_RSBN1	771.329	0.46755	0.101837	4.59116	4.40799e-06	0.00019077	RSBN1
ENSG00000081026.19_MAGI3	1012.97	0.0242802	0.101437	0.239361	0.810825	0.927057	MAGI3
ENSG00000081041.9_CXCL2	2.5893	0.378173	1.4497	0.260863	0.794198	NA	CXCL2
ENSG00000081051.8_AFP	0.557754	0.923953	3.29856	0.280108	0.779395	NA	AFP
ENSG00000081052.14_COL4A4	35.0828	-0.894492	0.38716	-2.31039	0.0208666	0.110835	COL4A4
ENSG00000081059.20_TCF7	723.689	-0.237294	0.11034	-2.15057	0.0315103	0.147163	TCF7
ENSG00000081087.16_OSTM1	331.253	0.0726256	0.137359	0.52873	0.596993	0.811692	OSTM1
ENSG00000081138.14_CDH7	97.0639	-0.177657	0.237213	-0.748933	0.453898	0.713309	CDH7
ENSG00000081148.12_IMPG2	10.2429	0.136372	0.738433	0.184677	0.853482	NA	IMPG2
ENSG00000081154.12_PCNP	2987.34	-0.144756	0.0911491	-1.58812	0.112258	0.324642	PCNP
ENSG00000081177.19_EXD2	755.043	-0.0694707	0.112887	-0.615401	0.53829	0.776391	EXD2
ENSG00000081181.8_ARG2	733.885	0.0559163	0.100424	0.556803	0.577662	0.801171	ARG2
ENSG00000081189.17_MEF2C	485.806	0.169182	0.121776	1.38928	0.164748	0.408817	MEF2C
ENSG00000081237.21_PTPRC	0	NA	NA	NA	NA	NA	PTPRC
ENSG00000081248.13_CACNA1S	6.77027	0.0967742	0.913632	0.105923	0.915644	NA	CACNA1S
ENSG00000081277.13_PKP1	0.141643	0.845613	4.08047	0.207234	0.835827	NA	PKP1
ENSG00000081307.15_UBA5	1670.11	0.0500755	0.0847784	0.590663	0.554746	0.785414	UBA5
ENSG00000081320.12_STK17B	465.333	0.19374	0.120548	1.60716	0.10802	0.317048	STK17B
ENSG00000081377.17_CDC14B	912.581	-0.0866837	0.104864	-0.826627	0.408449	0.674396	CDC14B
ENSG00000081386.13_ZNF510	278.244	0.440027	0.153884	2.85946	0.00424359	0.0374032	ZNF510
ENSG00000081479.15_LRP2	683.249	-0.178762	0.120466	-1.48393	0.137828	0.369066	LRP2
ENSG00000081665.14_ZNF506	19.0716	0.611964	0.499025	1.22632	0.220079	NA	ZNF506
ENSG00000081692.13_JMJD4	814.067	0.242194	0.106139	2.28185	0.0224982	0.116796	JMJD4
ENSG00000081721.12_DUSP12	503.099	0.0718528	0.134296	0.535033	0.592627	0.80934	DUSP12
ENSG00000081760.17_AACS	906.825	-0.00593874	0.109305	-0.0543317	0.956671	0.985243	AACS
ENSG00000081791.9_DELE1	808.518	-0.174985	0.105759	-1.65457	0.0980123	0.299513	DELE1
ENSG00000081800.9_SLC13A1	0	NA	NA	NA	NA	NA	SLC13A1
ENSG00000081803.17_CADPS2	377.431	-0.309569	0.137573	-2.25022	0.0244351	0.123675	CADPS2
ENSG00000081818.4_PCDHB4	0	NA	NA	NA	NA	NA	PCDHB4
ENSG00000081842.18_PCDHA6	0.283285	1.59311	4.05218	0.393148	0.69421	NA	PCDHA6
ENSG00000081853.15_PCDHGA2	1.2529	-3.84509	2.3996	-1.60239	0.109069	NA	PCDHGA2
ENSG00000081870.12_IFT25	404.343	0.0879176	0.164676	0.533883	0.593422	0.809833	IFT25
ENSG00000081913.14_PHLPP1	701.522	-0.173945	0.111158	-1.56485	0.117619	0.333769	PHLPP1
ENSG00000081923.15_ATP8B1	22.608	-0.115375	0.535077	-0.215624	0.829281	0.934946	ATP8B1
ENSG00000081985.14_IL12RB2	85.7108	-0.260822	0.248402	-1.05	0.293718	0.569398	IL12RB2
ENSG00000082014.17_SMARCD3	1324.67	0.267739	0.102615	2.60917	0.00907618	0.0628262	SMARCD3
ENSG00000082068.9_WDR70	824.714	0.0617371	0.0989728	0.623779	0.532773	0.772949	WDR70
ENSG00000082074.19_FYB1	0	NA	NA	NA	NA	NA	FYB1
ENSG00000082126.18_MPP4	1.88322	-0.458786	1.54715	-0.296536	0.766821	NA	MPP4
ENSG00000082146.13_STRADB	770.002	-0.278558	0.100812	-2.76313	0.00572492	0.0460554	STRADB
ENSG00000082153.18_BZW1	2740.44	0.203787	0.091645	2.22366	0.0261713	0.129924	BZW1
ENSG00000082175.16_PGR	0.768094	-1.89007	2.68819	-0.703101	0.481993	NA	PGR
ENSG00000082196.21_C1QTNF3	9.64544	0.736343	0.697321	1.05596	0.290986	NA	C1QTNF3
ENSG00000082212.13_ME2	1257.5	0.0803987	0.0868722	0.925481	0.354716	0.62648	ME2
ENSG00000082213.18_C5orf22	847.149	0.181748	0.111391	1.63162	0.102759	0.30766	C5orf22
ENSG00000082258.13_CCNT2	1104.86	0.288022	0.105761	2.72334	0.00646259	0.0504186	CCNT2
ENSG00000082269.17_FAM135A	541.05	-0.0464025	0.128102	-0.362232	0.717179	0.88052	FAM135A
ENSG00000082293.13_COL19A1	49.4761	0.275164	0.327627	0.839869	0.400982	0.668728	COL19A1
ENSG00000082397.18_EPB41L3	2648.86	0.0266227	0.0731165	0.364113	0.715774	0.879751	EPB41L3
ENSG00000082438.18_COBLL1	439.309	0.0625346	0.12281	0.5092	0.610612	0.819349	COBLL1
ENSG00000082458.12_DLG3	1325.86	-0.104951	0.0952341	-1.10203	0.27045	0.545392	DLG3
ENSG00000082482.14_KCNK2	0.656753	1.31771	2.84343	0.463421	0.643063	NA	KCNK2
ENSG00000082497.12_SERTAD4	357.514	-0.119299	0.129425	-0.921762	0.356653	0.627888	SERTAD4
ENSG00000082512.15_TRAF5	238.667	0.0695771	0.178121	0.390618	0.69608	0.868722	TRAF5
ENSG00000082515.18_MRPL22	730.24	-0.0138382	0.105072	-0.131702	0.89522	0.96249	MRPL22
ENSG00000082516.9_GEMIN5	2089.77	0.000967377	0.0798868	0.0121094	0.990338	0.997352	GEMIN5
ENSG00000082556.14_OPRK1	0.854558	-0.0366311	2.77533	-0.0131988	0.989469	NA	OPRK1
ENSG00000082641.16_NFE2L1	4118.69	-0.351804	0.111315	-3.16044	0.00157529	0.0183183	NFE2L1
ENSG00000082684.16_SEMA5B	53.1468	-0.253744	0.326499	-0.777169	0.437059	0.700032	SEMA5B
ENSG00000082701.17_GSK3B	1599.63	0.0372299	0.0824167	0.451728	0.651465	0.843672	GSK3B
ENSG00000082781.12_ITGB5	1041.32	-0.15303	0.093784	-1.63173	0.102736	0.307651	ITGB5
ENSG00000082805.21_ERC1	1944.46	0.13521	0.0832134	1.62486	0.104192	0.310287	ERC1
ENSG00000082898.19_XPO1	6278.03	0.000468992	0.0903826	0.00518896	0.99586	0.999273	XPO1
ENSG00000082929.8_LINC01587	0	NA	NA	NA	NA	NA	LINC01587
ENSG00000082996.20_RNF13	688.447	-0.0234727	0.109823	-0.213733	0.830755	0.935259	RNF13
ENSG00000083067.27_TRPM3	4.59012	1.49089	1.05839	1.40864	0.158942	NA	TRPM3
ENSG00000083093.12_PALB2	780.601	0.186967	0.104129	1.79554	0.0725682	0.249579	PALB2
ENSG00000083097.15_DOP1A	610.493	0.263535	0.108152	2.4367	0.0148218	0.0880661	DOP1A
ENSG00000083099.11_LYRM2	1206.29	0.0332593	0.10488	0.317117	0.751155	0.896952	LYRM2
ENSG00000083123.15_BCKDHB	409.058	-0.327079	0.124387	-2.62952	0.0085505	0.0604773	BCKDHB
ENSG00000083168.11_KAT6A	3419.44	0.13099	0.078115	1.67688	0.0935651	0.291897	KAT6A
ENSG00000083223.18_TUT7	952.331	0.327808	0.100642	3.25717	0.0011253	0.0142268	TUT7
ENSG00000083290.20_ULK2	272.143	-0.268181	0.149481	-1.79408	0.072801	0.250197	ULK2
ENSG00000083307.12_GRHL2	2.2582	-0.0692197	1.51011	-0.0458374	0.96344	NA	GRHL2
ENSG00000083312.19_TNPO1	4215.26	-0.0186948	0.0815614	-0.229211	0.818705	0.930933	TNPO1
ENSG00000083444.17_PLOD1	2484.91	-0.11492	0.0767789	-1.49677	0.134453	0.363154	PLOD1
ENSG00000083454.23_P2RX5	10.7667	0.635365	0.692041	0.918103	0.358565	NA	P2RX5
ENSG00000083457.12_ITGAE	248.098	0.0928037	0.155292	0.597607	0.550102	0.782893	ITGAE
ENSG00000083520.15_DIS3	4437.02	0.209187	0.0863254	2.42324	0.0153827	0.0902731	DIS3
ENSG00000083535.16_PIBF1	1149.3	0.503004	0.0967292	5.20012	1.99162e-07	1.52497e-05	PIBF1
ENSG00000083544.16_TDRD3	447.461	0.212904	0.123727	1.72075	0.0852961	0.27584	TDRD3
ENSG00000083622.8_ENSG00000083622	0	NA	NA	NA	NA	NA	ENSG00000083622
ENSG00000083635.8_NUFIP1	678.563	0.536414	0.109332	4.90628	9.28217e-07	5.25308e-05	NUFIP1
ENSG00000083642.19_PDS5B	2023.16	0.231046	0.109608	2.10794	0.0350366	0.157855	PDS5B
ENSG00000083720.13_OXCT1	585.788	-0.230378	0.113237	-2.03448	0.0419031	0.177139	OXCT1
ENSG00000083750.13_RRAGB	123.664	0.666855	0.205122	3.25102	0.00114992	0.0145012	RRAGB
ENSG00000083782.8_EPYC	0	NA	NA	NA	NA	NA	EPYC
ENSG00000083799.18_CYLD	707.911	0.0585526	0.103084	0.568011	0.570028	0.795205	CYLD
ENSG00000083807.10_SLC27A5	109.295	-0.526785	0.227486	-2.31569	0.0205755	0.109797	SLC27A5
ENSG00000083812.13_ZNF324	546.054	0.240631	0.114229	2.10656	0.0351555	0.158247	ZNF324
ENSG00000083814.13_ZNF671	0	NA	NA	NA	NA	NA	ZNF671
ENSG00000083817.9_ZNF416	171.009	1.07428	0.191697	5.60406	2.09385e-08	2.41808e-06	ZNF416
ENSG00000083828.16_ZNF586	152.506	0.0918927	0.186368	0.493071	0.621962	0.825542	ZNF586
ENSG00000083838.17_ZNF446	313.665	-0.190963	0.169447	-1.12697	0.259754	0.533918	ZNF446
ENSG00000083844.11_ZNF264	369.354	0.42701	0.161093	2.65071	0.00803231	0.0578257	ZNF264
ENSG00000083845.9_RPS5	8352.04	-0.292155	0.0905668	-3.22585	0.00125599	0.0155241	RPS5
ENSG00000083857.15_FAT1	1693.46	-0.0879556	0.108795	-0.808453	0.41883	0.683523	FAT1
ENSG00000083896.13_YTHDC1	2696.87	0.214313	0.0846755	2.53099	0.0113741	0.0732978	YTHDC1
ENSG00000083937.10_CHMP2B	1154.12	0.0564747	0.0933137	0.605214	0.545037	0.780095	CHMP2B
ENSG00000084070.12_SMAP2	1087.13	-0.0232789	0.0958203	-0.242943	0.80805	0.925513	SMAP2
ENSG00000084072.17_PPIE	1274.34	0.0800157	0.100134	0.799089	0.424239	0.687914	PPIE
ENSG00000084073.10_ZMPSTE24	1324.24	0.0659143	0.101556	0.649045	0.516309	0.761384	ZMPSTE24
ENSG00000084090.14_STARD7	5155.42	-0.215167	0.0804921	-2.67315	0.00751436	0.0554607	STARD7
ENSG00000084092.7_NOA1	1551.13	-0.137764	0.104836	-1.31409	0.188817	0.444253	NOA1
ENSG00000084093.19_REST	1264.57	0.151258	0.0931824	1.62324	0.104537	0.310616	REST
ENSG00000084110.11_HAL	10.2888	0.998875	0.724411	1.37888	0.167932	NA	HAL
ENSG00000084112.15_SSH1	1041.52	-0.150762	0.0943318	-1.5982	0.109997	0.320026	SSH1
ENSG00000084207.18_GSTP1	5562.11	-0.260303	0.105939	-2.45711	0.014006	0.0849061	GSTP1
ENSG00000084234.18_APLP2	13052.5	-0.28442	0.074511	-3.81716	0.000134996	0.00292297	APLP2
ENSG00000084444.14_FAM234B	933.71	-0.306345	0.127887	-2.39543	0.0166009	0.095078	FAM234B
ENSG00000084453.17_SLCO1A2	7.93845	-1.49859	0.842341	-1.77908	0.0752262	NA	SLCO1A2
ENSG00000084463.8_WBP11	4678.55	0.0703487	0.0726078	0.968887	0.332602	0.607605	WBP11
ENSG00000084623.12_EIF3I	8103.24	-0.127176	0.0729208	-1.74403	0.0811538	0.267603	EIF3I
ENSG00000084628.10_NKAIN1	187.677	-0.306982	0.182299	-1.68395	0.0921921	0.289185	NKAIN1
ENSG00000084636.18_COL16A1	41.4597	-0.291871	0.352191	-0.82873	0.407257	0.673289	COL16A1
ENSG00000084652.16_TXLNA	4259.88	-0.0208272	0.069077	-0.301507	0.763028	0.903901	TXLNA
ENSG00000084674.15_APOB	0.28642	-1.74118	4.06107	-0.42875	0.668105	NA	APOB
ENSG00000084676.16_NCOA1	1346.25	0.0301274	0.085244	0.353426	0.723769	0.883109	NCOA1
ENSG00000084693.16_AGBL5	1877.23	-0.171905	0.0917589	-1.87344	0.0610081	0.223977	AGBL5
ENSG00000084710.14_EFR3B	275.715	-0.0637418	0.149367	-0.426747	0.669564	0.854007	EFR3B
ENSG00000084731.15_KIF3C	853.86	-0.292103	0.11916	-2.45135	0.0142323	0.0856864	KIF3C
ENSG00000084733.11_RAB10	2600.5	-0.0691681	0.0826155	-0.837229	0.402464	0.669713	RAB10
ENSG00000084734.9_GCKR	0.751739	-0.481261	2.71405	-0.177322	0.859255	NA	GCKR
ENSG00000084754.12_HADHA	5519.58	-0.239405	0.081796	-2.92685	0.00342413	0.0321142	HADHA
ENSG00000084764.12_MAPRE3	282.599	0.123287	0.155812	0.791253	0.428797	0.691998	MAPRE3
ENSG00000084774.14_CAD	6352.69	-0.243071	0.0879603	-2.76341	0.00572004	0.0460409	CAD
ENSG00000085063.18_CD59	976.43	-0.0341547	0.0999819	-0.341609	0.732645	0.888551	CD59
ENSG00000085117.12_CD82	168.376	-0.0508245	0.191112	-0.265941	0.790285	0.918983	CD82
ENSG00000085185.16_BCORL1	2427.29	-0.00701791	0.0756792	-0.0927323	0.926116	0.974478	BCORL1
ENSG00000085224.23_ATRX	2603.42	0.213233	0.115706	1.84288	0.0653465	0.234034	ATRX
ENSG00000085231.14_AK6	491.732	0.0336686	0.124243	0.27099	0.786399	0.917005	AK6
ENSG00000085265.12_FCN1	0	NA	NA	NA	NA	NA	FCN1
ENSG00000085274.16_MYNN	571.434	-0.0890408	0.115233	-0.7727	0.4397	0.701446	MYNN
ENSG00000085276.19_MECOM	639.689	0.158442	0.107398	1.47528	0.140136	0.373439	MECOM
ENSG00000085365.18_SCAMP1	1422.72	-0.221573	0.105638	-2.09749	0.0359505	0.160692	SCAMP1
ENSG00000085377.15_PREP	951.495	0.00110934	0.0978496	0.0113372	0.990954	0.997771	PREP
ENSG00000085382.12_HACE1	428.013	0.0174791	0.137572	0.127054	0.898898	0.963976	HACE1
ENSG00000085415.16_SEH1L	756.175	-0.148394	0.124933	-1.1878	0.234914	0.504279	SEH1L
ENSG00000085433.17_WDR47	453.161	0.435072	0.122772	3.54373	0.000394507	0.00661546	WDR47
ENSG00000085449.15_WDFY1	1390.86	-0.309488	0.0893808	-3.46257	0.000535037	0.00835632	WDFY1
ENSG00000085465.13_OVGP1	425.207	1.38737	0.128242	10.8184	2.81518e-27	1.05084e-23	OVGP1
ENSG00000085491.17_SLC25A24	913.263	-0.147875	0.105166	-1.40611	0.159692	0.401233	SLC25A24
ENSG00000085511.20_MAP3K4	1287.52	0.170555	0.0905542	1.88346	0.0596384	0.220849	MAP3K4
ENSG00000085514.16_PILRA	51.9432	0.691756	0.357561	1.93465	0.0530328	0.205298	PILRA
ENSG00000085552.18_IGSF9	80.4813	-0.0955371	0.25519	-0.374376	0.708124	0.875744	IGSF9
ENSG00000085563.15_ABCB1	196.837	0.0910055	0.18901	0.481486	0.630171	0.830799	ABCB1
ENSG00000085644.15_ZNF213	812.473	0.29714	0.106094	2.80072	0.00509887	0.0426969	ZNF213
ENSG00000085662.14_AKR1B1	3084.83	-0.271237	0.0964834	-2.81123	0.00493527	0.041632	AKR1B1
ENSG00000085719.13_CPNE3	1663.05	-0.15229	0.0900684	-1.69083	0.0908699	0.286542	CPNE3
ENSG00000085721.13_RRN3	1438	0.20942	0.0942358	2.2223	0.0262632	0.130105	RRN3
ENSG00000085733.16_CTTN	3507.65	-0.25547	0.0684823	-3.73045	0.000191136	0.00376669	CTTN
ENSG00000085741.14_WNT11	310.843	0.102475	0.151658	0.675697	0.499233	0.749829	WNT11
ENSG00000085760.15_MTIF2	2214.58	-0.0499395	0.0781158	-0.639301	0.522627	0.765935	MTIF2
ENSG00000085788.14_DDHD2	1486.16	-0.30354	0.0859136	-3.53308	0.000410746	0.0068183	DDHD2
ENSG00000085831.16_TTC39A	254.386	-0.359853	0.169325	-2.12522	0.0335685	0.153605	TTC39A
ENSG00000085832.18_EPS15	1508.77	-0.0812164	0.0969139	-0.838026	0.402016	0.669595	EPS15
ENSG00000085840.13_ORC1	1357.69	0.209466	0.096628	2.16775	0.0301775	0.142905	ORC1
ENSG00000085871.9_MGST2	368.687	0.0389999	0.138442	0.281706	0.778169	0.912721	MGST2
ENSG00000085872.15_CHERP	3025.65	0.0424999	0.0794665	0.534815	0.592778	0.809398	CHERP
ENSG00000085978.22_ATG16L1	602.676	0.089508	0.122135	0.732861	0.463643	0.72096	ATG16L1
ENSG00000085982.16_USP40	737.693	0.0762989	0.103632	0.736247	0.46158	0.719851	USP40
ENSG00000085998.15_POMGNT1	810.377	-0.116892	0.102805	-1.13702	0.25553	0.529947	POMGNT1
ENSG00000085999.13_RAD54L	1386.07	0.00893119	0.0828462	0.107805	0.914151	0.969675	RAD54L
ENSG00000086015.23_MAST2	1342.82	0.0476206	0.0831321	0.57283	0.56676	0.79351	MAST2
ENSG00000086061.16_DNAJA1	3883.35	-0.0089511	0.11596	-0.0771914	0.938471	0.978668	DNAJA1
ENSG00000086062.13_B4GALT1	1808.04	-0.381994	0.100865	-3.7872	0.000152357	0.00320401	B4GALT1
ENSG00000086065.14_CHMP5	1129.79	-0.239828	0.0877177	-2.73409	0.00625529	0.0492345	CHMP5
ENSG00000086102.19_NFX1	2129.68	0.241956	0.0764942	3.16306	0.00156122	0.0182256	NFX1
ENSG00000086159.14_AQP6	15.9444	-0.536353	0.569602	-0.941628	0.346383	NA	AQP6
ENSG00000086189.11_DIMT1	590.826	0.0821164	0.13175	0.623274	0.533105	0.773095	DIMT1
ENSG00000086200.17_IPO11	1317.01	-0.0385256	0.0895217	-0.430349	0.666942	0.852769	IPO11
ENSG00000086205.18_FOLH1	14.8421	-0.450592	0.575337	-0.783179	0.433522	NA	FOLH1
ENSG00000086232.13_EIF2AK1	3813.38	-0.202493	0.0707643	-2.86152	0.00421619	0.0372717	EIF2AK1
ENSG00000086288.12_NME8	0	NA	NA	NA	NA	NA	NME8
ENSG00000086289.13_EPDR1	170.939	-0.108617	0.179928	-0.603668	0.546064	0.780891	EPDR1
ENSG00000086300.17_SNX10	244.505	-0.429588	0.160911	-2.66973	0.00759114	0.0557792	SNX10
ENSG00000086475.15_SEPHS1	1546	0.013057	0.0899406	0.145173	0.884574	0.957888	SEPHS1
ENSG00000086504.18_MRPL28	2376.93	-0.00493158	0.085508	-0.0576739	0.954008	0.98439	MRPL28
ENSG00000086506.3_HBQ1	65.6509	-0.730184	0.282884	-2.58122	0.00984531	0.066516	HBQ1
ENSG00000086544.4_ITPKC	340.456	0.192699	0.149393	1.28988	0.197092	0.455265	ITPKC
ENSG00000086548.9_CEACAM6	0.831254	0.366462	2.60709	0.140563	0.888215	NA	CEACAM6
ENSG00000086570.13_FAT2	2.08045	-0.207143	1.50192	-0.137919	0.890304	NA	FAT2
ENSG00000086589.12_RBM22	1531.38	0.174165	0.0905553	1.9233	0.0544422	0.209019	RBM22
ENSG00000086598.11_TMED2	4558.9	-0.182306	0.0697031	-2.61547	0.00891057	0.062083	TMED2
ENSG00000086619.15_ERO1B	450.388	-0.268433	0.142289	-1.88653	0.0592233	0.219759	ERO1B
ENSG00000086666.19_ZFAND6	827.964	-0.0833755	0.109394	-0.76216	0.445965	0.70644	ZFAND6
ENSG00000086696.11_HSD17B2	0	NA	NA	NA	NA	NA	HSD17B2
ENSG00000086712.13_TXLNG	2921.12	0.0672928	0.0767874	0.876353	0.380838	0.650602	TXLNG
ENSG00000086717.19_PPEF1	12.5204	-0.244706	0.638223	-0.383419	0.701409	NA	PPEF1
ENSG00000086730.17_LAT2	15.2359	-0.963164	0.663464	-1.45172	0.146579	NA	LAT2
ENSG00000086758.17_HUWE1	19371.2	-0.109378	0.0681175	-1.60573	0.108333	0.317534	HUWE1
ENSG00000086827.9_ZW10	959.625	0.217406	0.104972	2.07109	0.0383506	0.16802	ZW10
ENSG00000086848.15_ALG9	457.428	0.0125224	0.128092	0.0977604	0.922123	0.973068	ALG9
ENSG00000086967.10_MYBPC2	11.5089	0.595617	0.646258	0.921639	0.356717	NA	MYBPC2
ENSG00000086991.13_NOX4	0.566571	2.58584	3.53079	0.732369	0.463944	NA	NOX4
ENSG00000087008.16_ACOX3	253.735	-0.196997	0.18498	-1.06496	0.286894	0.562745	ACOX3
ENSG00000087053.20_MTMR2	1507.19	0.0843002	0.0849081	0.992841	0.320787	0.596993	MTMR2
ENSG00000087074.9_PPP1R15A	1937.39	0.0892583	0.125551	0.710935	0.477125	0.732284	PPP1R15A
ENSG00000087076.9_HSD17B14	112.582	-0.479375	0.223344	-2.14635	0.0318451	0.147986	HSD17B14
ENSG00000087077.14_TRIP6	1564.3	0.0390677	0.123136	0.317273	0.751036	0.896952	TRIP6
ENSG00000087085.16_ACHE	129.382	0.695863	0.207084	3.3603	0.000778592	0.010804	ACHE
ENSG00000087086.15_FTL	4819.75	-0.43954	0.0877863	-5.00694	5.53028e-07	3.51373e-05	FTL
ENSG00000087087.20_SRRT	7264.16	0.444638	0.211548	2.10183	0.035568	0.159527	SRRT
ENSG00000087088.21_BAX	934.546	0.101963	0.10694	0.953464	0.340355	0.6134	BAX
ENSG00000087095.13_NLK	331.311	0.204205	0.141444	1.44371	0.14882	0.385904	NLK
ENSG00000087111.22_PIGS	2611.59	-0.117163	0.0851082	-1.37664	0.168624	0.414646	PIGS
ENSG00000087116.17_ADAMTS2	388.906	-0.478581	0.13646	-3.50713	0.000452971	0.00733548	ADAMTS2
ENSG00000087128.10_TMPRSS11E	0	NA	NA	NA	NA	NA	TMPRSS11E
ENSG00000087152.16_ATXN7L3	1286.79	-0.0388451	0.0984971	-0.394379	0.693302	0.867167	ATXN7L3
ENSG00000087157.19_PGS1	623.61	0.382941	0.116255	3.29398	0.000987796	0.0129149	PGS1
ENSG00000087191.14_PSMC5	3608.95	-0.00961987	0.0761769	-0.126283	0.899508	0.964172	PSMC5
ENSG00000087206.17_UIMC1	1257.5	0.52808	0.0909338	5.8073	6.34872e-09	9.20319e-07	UIMC1
ENSG00000087237.12_CETP	0.380573	-2.09225	3.7626	-0.556066	0.578166	NA	CETP
ENSG00000087245.13_MMP2	272.175	-0.331396	0.168	-1.97259	0.0485421	0.194624	MMP2
ENSG00000087250.9_MT3	0	NA	NA	NA	NA	NA	MT3
ENSG00000087253.13_LPCAT2	363.716	-0.189209	0.140668	-1.34508	0.178599	0.428518	LPCAT2
ENSG00000087258.17_GNAO1	140.965	-0.234538	0.231915	-1.01131	0.311869	0.587715	GNAO1
ENSG00000087263.17_OGFOD1	1350.88	-0.0498806	0.0874856	-0.570158	0.568571	0.794509	OGFOD1
ENSG00000087266.18_SH3BP2	1112.17	-0.186045	0.102251	-1.81948	0.0688377	0.241612	SH3BP2
ENSG00000087269.16_NOP14	6306.75	0.194474	0.0706	2.75459	0.00587665	0.0469221	NOP14
ENSG00000087274.19_ADD1	4050.54	-0.0739811	0.0753376	-0.981993	0.326103	0.60253	ADD1
ENSG00000087299.12_L2HGDH	815.49	-0.270565	0.0994353	-2.72102	0.00650812	0.0505319	L2HGDH
ENSG00000087301.9_TXNDC16	695.352	-0.190738	0.106708	-1.78748	0.0738606	0.252253	TXNDC16
ENSG00000087302.9_RTRAF	2951.51	-0.039346	0.0910321	-0.432221	0.665581	0.852078	RTRAF
ENSG00000087303.19_NID2	1318.01	-0.543751	0.107895	-5.03961	4.66483e-07	3.05485e-05	NID2
ENSG00000087338.5_GMCL1	876.145	-0.160629	0.0962604	-1.66869	0.0951794	0.294473	GMCL1
ENSG00000087365.16_SF3B2	11268.5	-0.0992816	0.0715734	-1.38713	0.165402	0.409827	SF3B2
ENSG00000087448.11_KLHL42	439.73	-0.0346979	0.135176	-0.256686	0.797421	0.921754	KLHL42
ENSG00000087460.29_GNAS	25141.2	-0.189872	0.063141	-3.00711	0.00263747	0.0267891	GNAS
ENSG00000087470.21_DNM1L	2670.36	-0.132692	0.0821908	-1.61444	0.106432	0.313872	DNM1L
ENSG00000087494.16_PTHLH	14.7988	-0.193671	0.584113	-0.331565	0.740218	NA	PTHLH
ENSG00000087495.17_PHACTR3	180.743	0.150847	0.172748	0.873218	0.382545	0.651731	PHACTR3
ENSG00000087502.19_ERGIC2	933.892	-0.0331621	0.102148	-0.324648	0.745447	0.894932	ERGIC2
ENSG00000087510.7_TFAP2C	294.211	0.12831	0.155268	0.826381	0.408588	0.674401	TFAP2C
ENSG00000087586.18_AURKA	1845.11	0.276859	0.0941095	2.94189	0.00326221	0.0309454	AURKA
ENSG00000087589.17_CASS4	52.1254	0.456824	0.332027	1.37586	0.168864	0.414662	CASS4
ENSG00000087842.11_PIR	241.964	-0.260815	0.165647	-1.57452	0.115367	0.33031	PIR
ENSG00000087884.16_AAMDC	177.167	-0.392694	0.198779	-1.97553	0.0482075	0.193792	AAMDC
ENSG00000087903.13_RFX2	693.321	0.440977	0.11222	3.92959	8.50902e-05	0.00207595	RFX2
ENSG00000087995.16_METTL2A	979.323	0.120914	0.0950437	1.2722	0.203303	0.463509	METTL2A
ENSG00000088002.12_SULT2B1	31.0422	-0.0687929	0.439361	-0.156575	0.87558	0.955091	SULT2B1
ENSG00000088035.18_ALG6	601.347	-0.0663231	0.130702	-0.507438	0.611848	0.819951	ALG6
ENSG00000088038.20_CNOT3	3508.78	0.313178	0.0797302	3.92798	8.56639e-05	0.00208314	CNOT3
ENSG00000088053.11_GP6	11.0128	-0.115613	0.689668	-0.167635	0.86687	NA	GP6
ENSG00000088179.9_PTPN4	552.928	-0.0280361	0.112871	-0.24839	0.803833	0.923716	PTPN4
ENSG00000088205.13_DDX18	2260.5	0.115993	0.0794797	1.45941	0.144453	0.37979	DDX18
ENSG00000088247.19_KHSRP	15615.4	-0.182033	0.0758417	-2.40017	0.0163876	0.0944723	KHSRP
ENSG00000088256.9_GNA11	1900.52	0.0423739	0.0840175	0.504345	0.614019	0.821335	GNA11
ENSG00000088280.21_ASAP3	620.671	-0.111375	0.110527	-1.00768	0.313608	0.589882	ASAP3
ENSG00000088298.13_EDEM2	303.105	-0.224605	0.141819	-1.58375	0.113251	0.326254	EDEM2
ENSG00000088305.19_DNMT3B	1635.89	-0.0435941	0.0847955	-0.514109	0.607176	0.817522	DNMT3B
ENSG00000088320.4_REM1	0	NA	NA	NA	NA	NA	REM1
ENSG00000088325.16_TPX2	6888.13	0.00183972	0.0722988	0.0254461	0.979699	0.992913	TPX2
ENSG00000088340.18_FER1L4	1.14568	-3.72621	2.73879	-1.36053	0.173662	NA	FER1L4
[truncated: 61,315 more rows]

## Sheet: Supplemental Table S6
Supplemental Table S6: Summary of cardiomyopathy DEGs (by disease type) and their overlap with SPC and SNC genes
[truncated: 4,181 more rows]

[truncated: 4 more sheets: Supplemental Table S7, Supplemental Table S8, Supplemental Table S9, Supplemental Table S10]
